# Supplementary material for: Room temperature, open-flask C–H arylation of electron-deficient heteroarenes with triazenes: rapid synthesis of heterobiaryls
Source: Royal Society of Chemistry journal article supplement (doi:10.1039/c4qo00213j), 2014-01-01

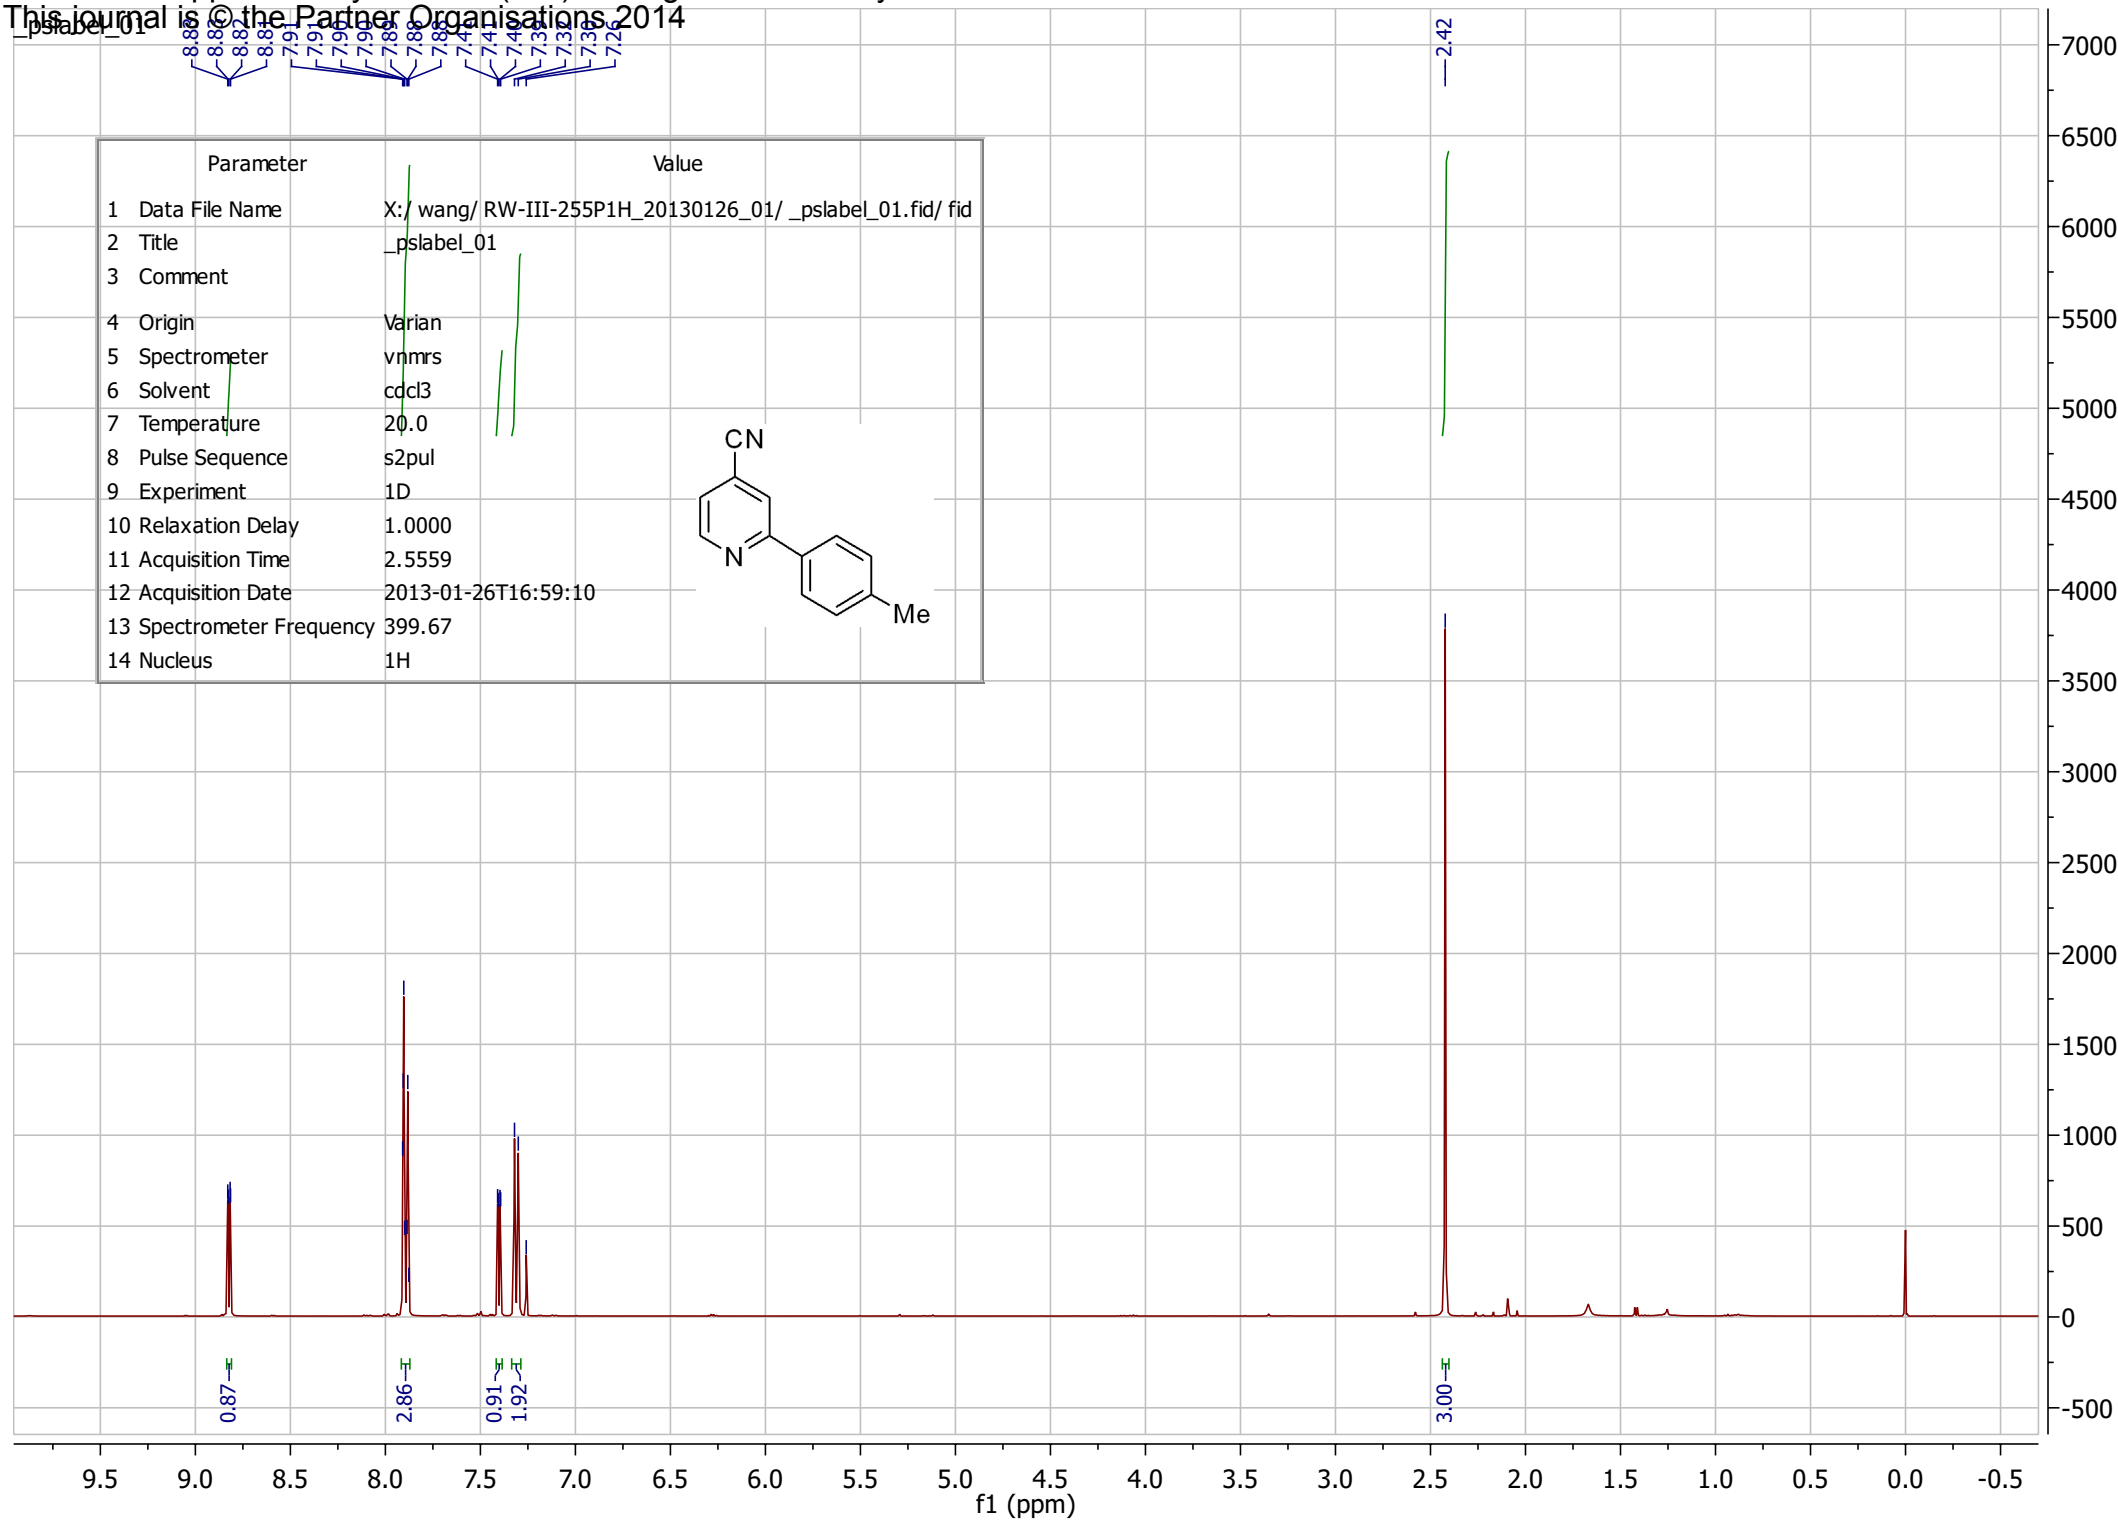

158.70

150.52

140.49

134.46

129.80

126.82

121.08

116.80

77.35  
77.04  
76.72

21.34

| Parameter                 | Value                   |
|---------------------------|-------------------------|
| 1 Data File Name          | Z:/ wang/ RW-III-255P1C |
| 2 Title                   |                         |
| 3 Origin                  | vnmrs                   |
| 4 Owner                   |                         |
| 5 Solvent                 | cdcl3                   |
| 6 Pulse Sequence          | s2pul                   |
| 7 Acquisition Date        | 2013-01-27T17:45:40     |
| 8 Modification Date       |                         |
| 9 Temperature             | 20.0                    |
| 10 Number of Scans        | 650                     |
| 11 Spectrometer Frequency | 100.51                  |
| 12 Spectral Width         | 21186.4                 |
| 13 Lowest Frequency       | -1046.0                 |
| 14 Nucleus                | 13C                     |
| 15 Acquired Size          | 32768                   |
| 16 Spectral Size          | 65536                   |

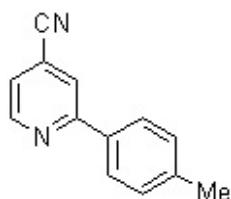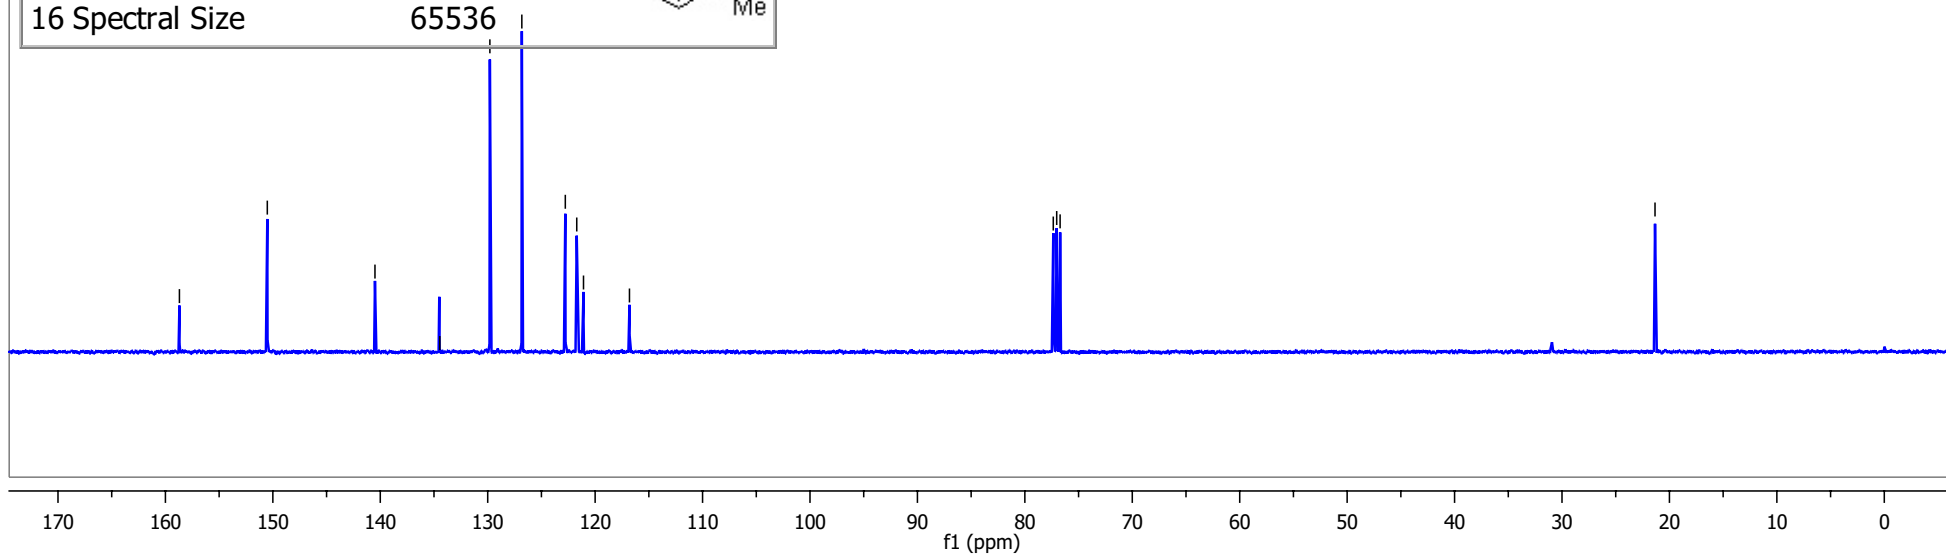

\_pslabel\_01

8.85  
8.73  
8.71

7.61  
7.60  
7.49  
7.47  
7.36  
7.34  
7.26

2.44

| Parameter                 | Value                                                     |
|---------------------------|-----------------------------------------------------------|
| 1 Data File Name          | X:/ wang/ RW-III-255P2H_20130126_01/ _pslabel_01.fid/ fid |
| 2 Title                   | _pslabel_01                                               |
| 3 Comment                 |                                                           |
| 4 Origin                  | Varian                                                    |
| 5 Spectrometer            | vnmrs                                                     |
| 6 Solvent                 | cdcl3                                                     |
| 7 Temperature             | 20.0                                                      |
| 8 Pulse Sequence          | s2pul                                                     |
| 9 Experiment              | 1D                                                        |
| 10 Relaxation Delay       | 1.0000                                                    |
| 11 Acquisition Time       | 2.5559                                                    |
| 12 Acquisition Date       | 2013-01-26T17:03:04                                       |
| 13 Spectrometer Frequency | 399.67                                                    |
| 14 Nucleus                | 1H                                                        |

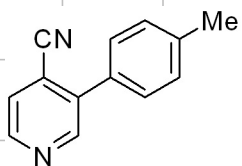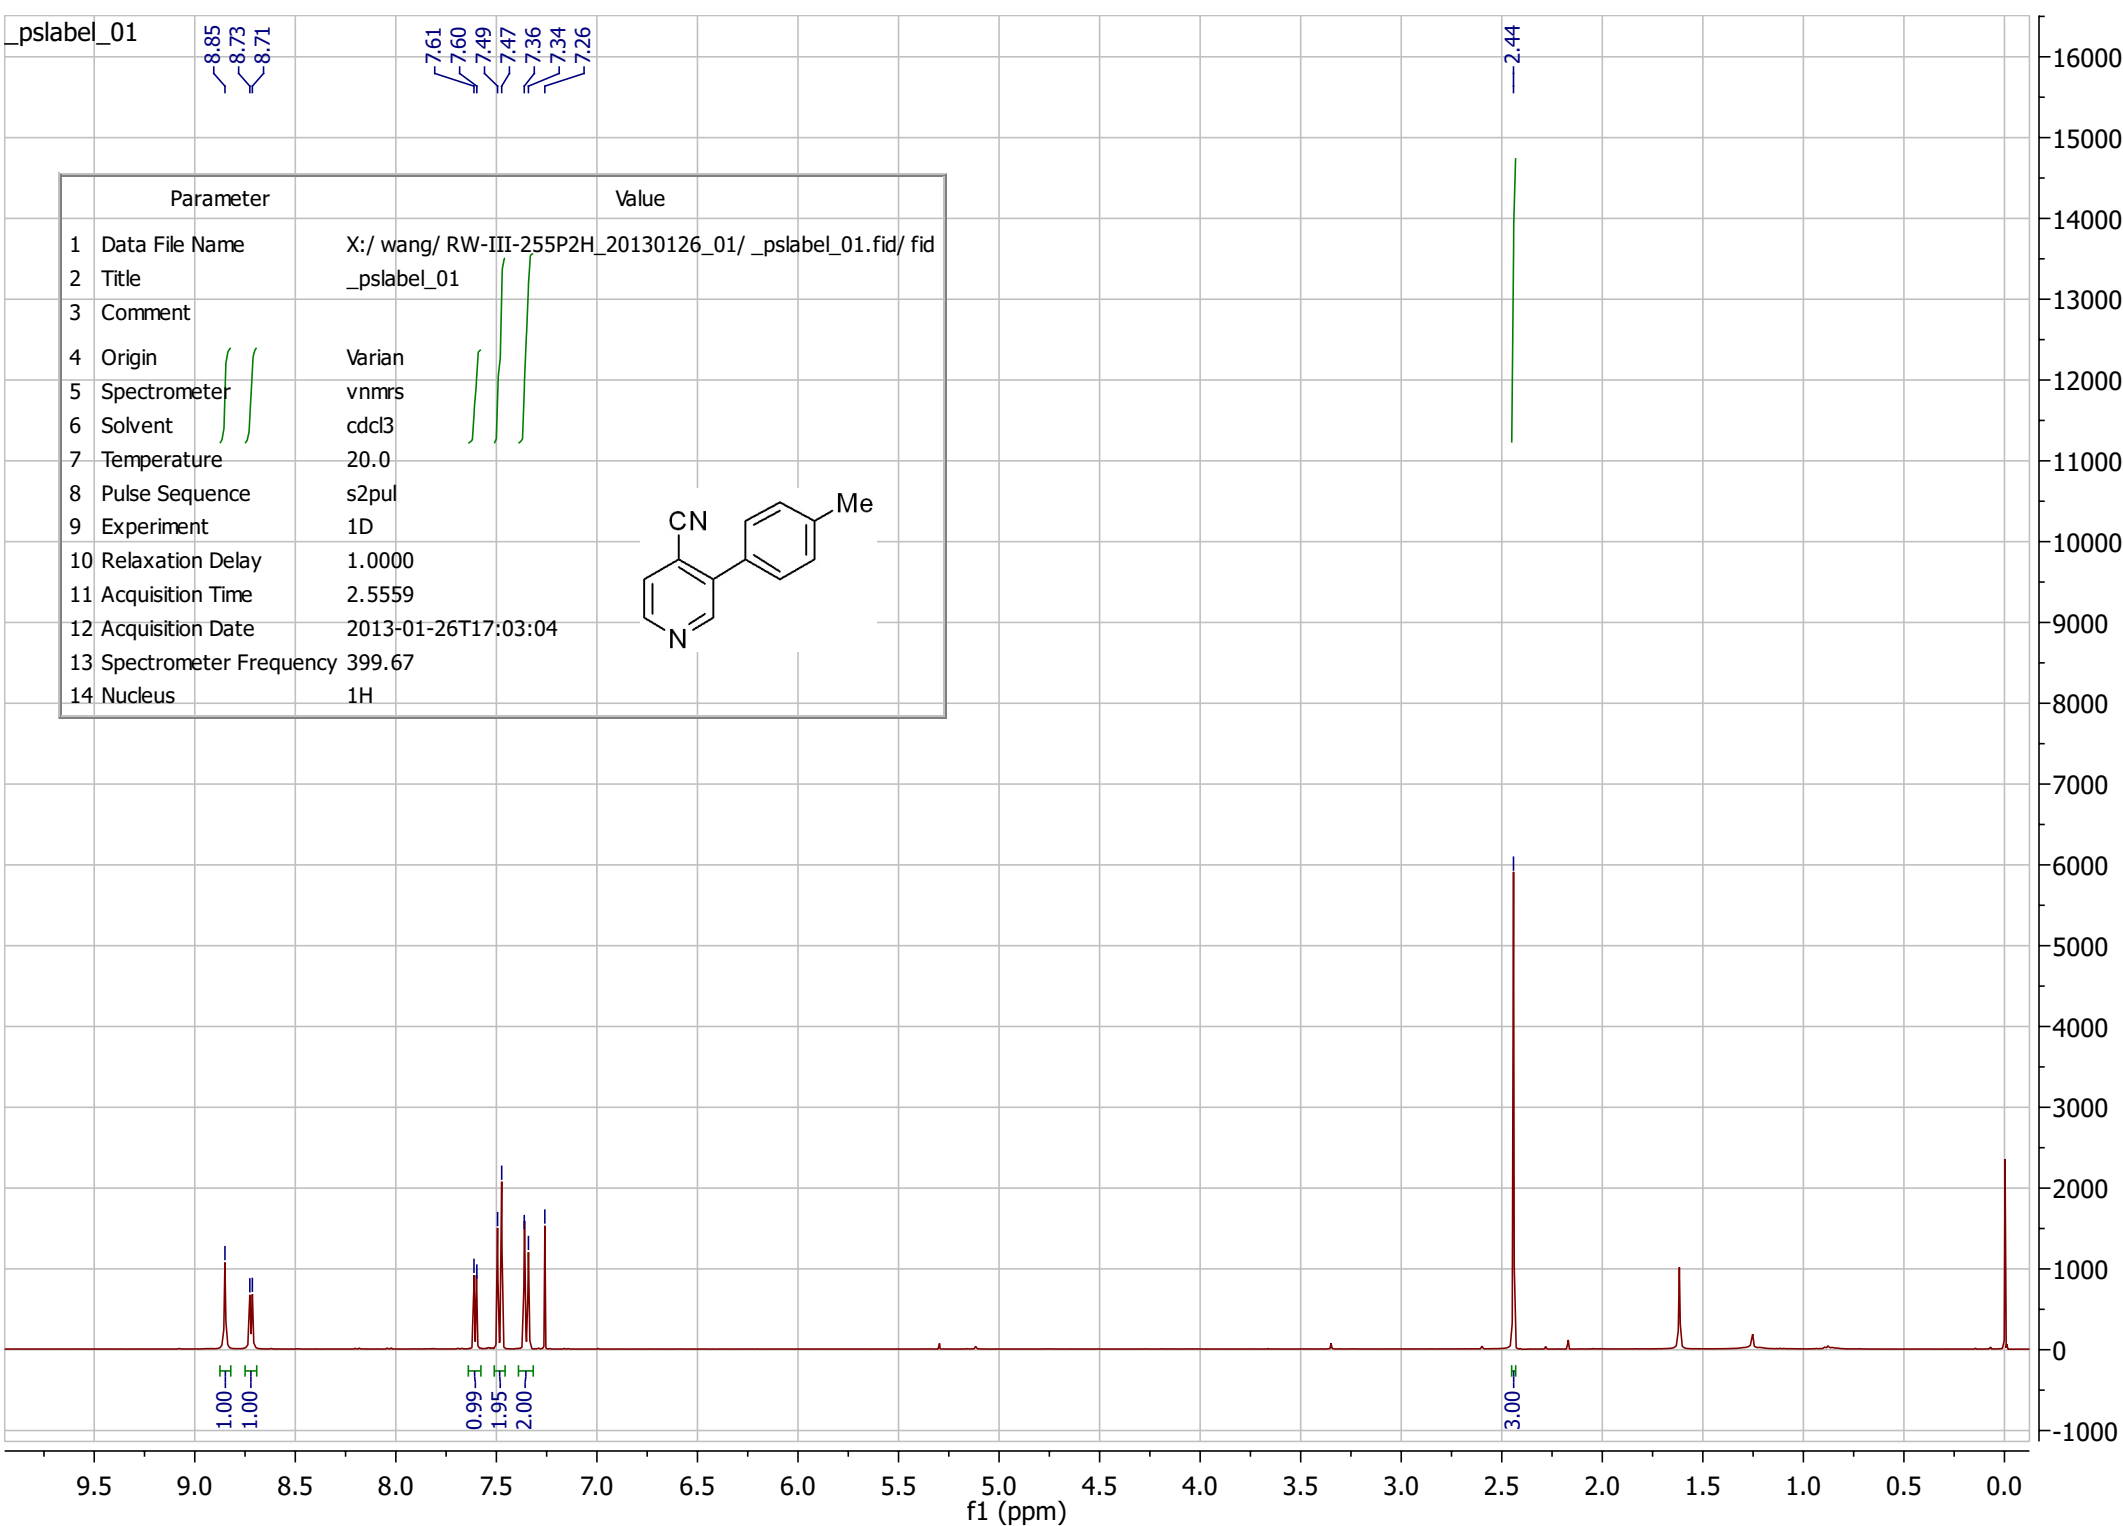

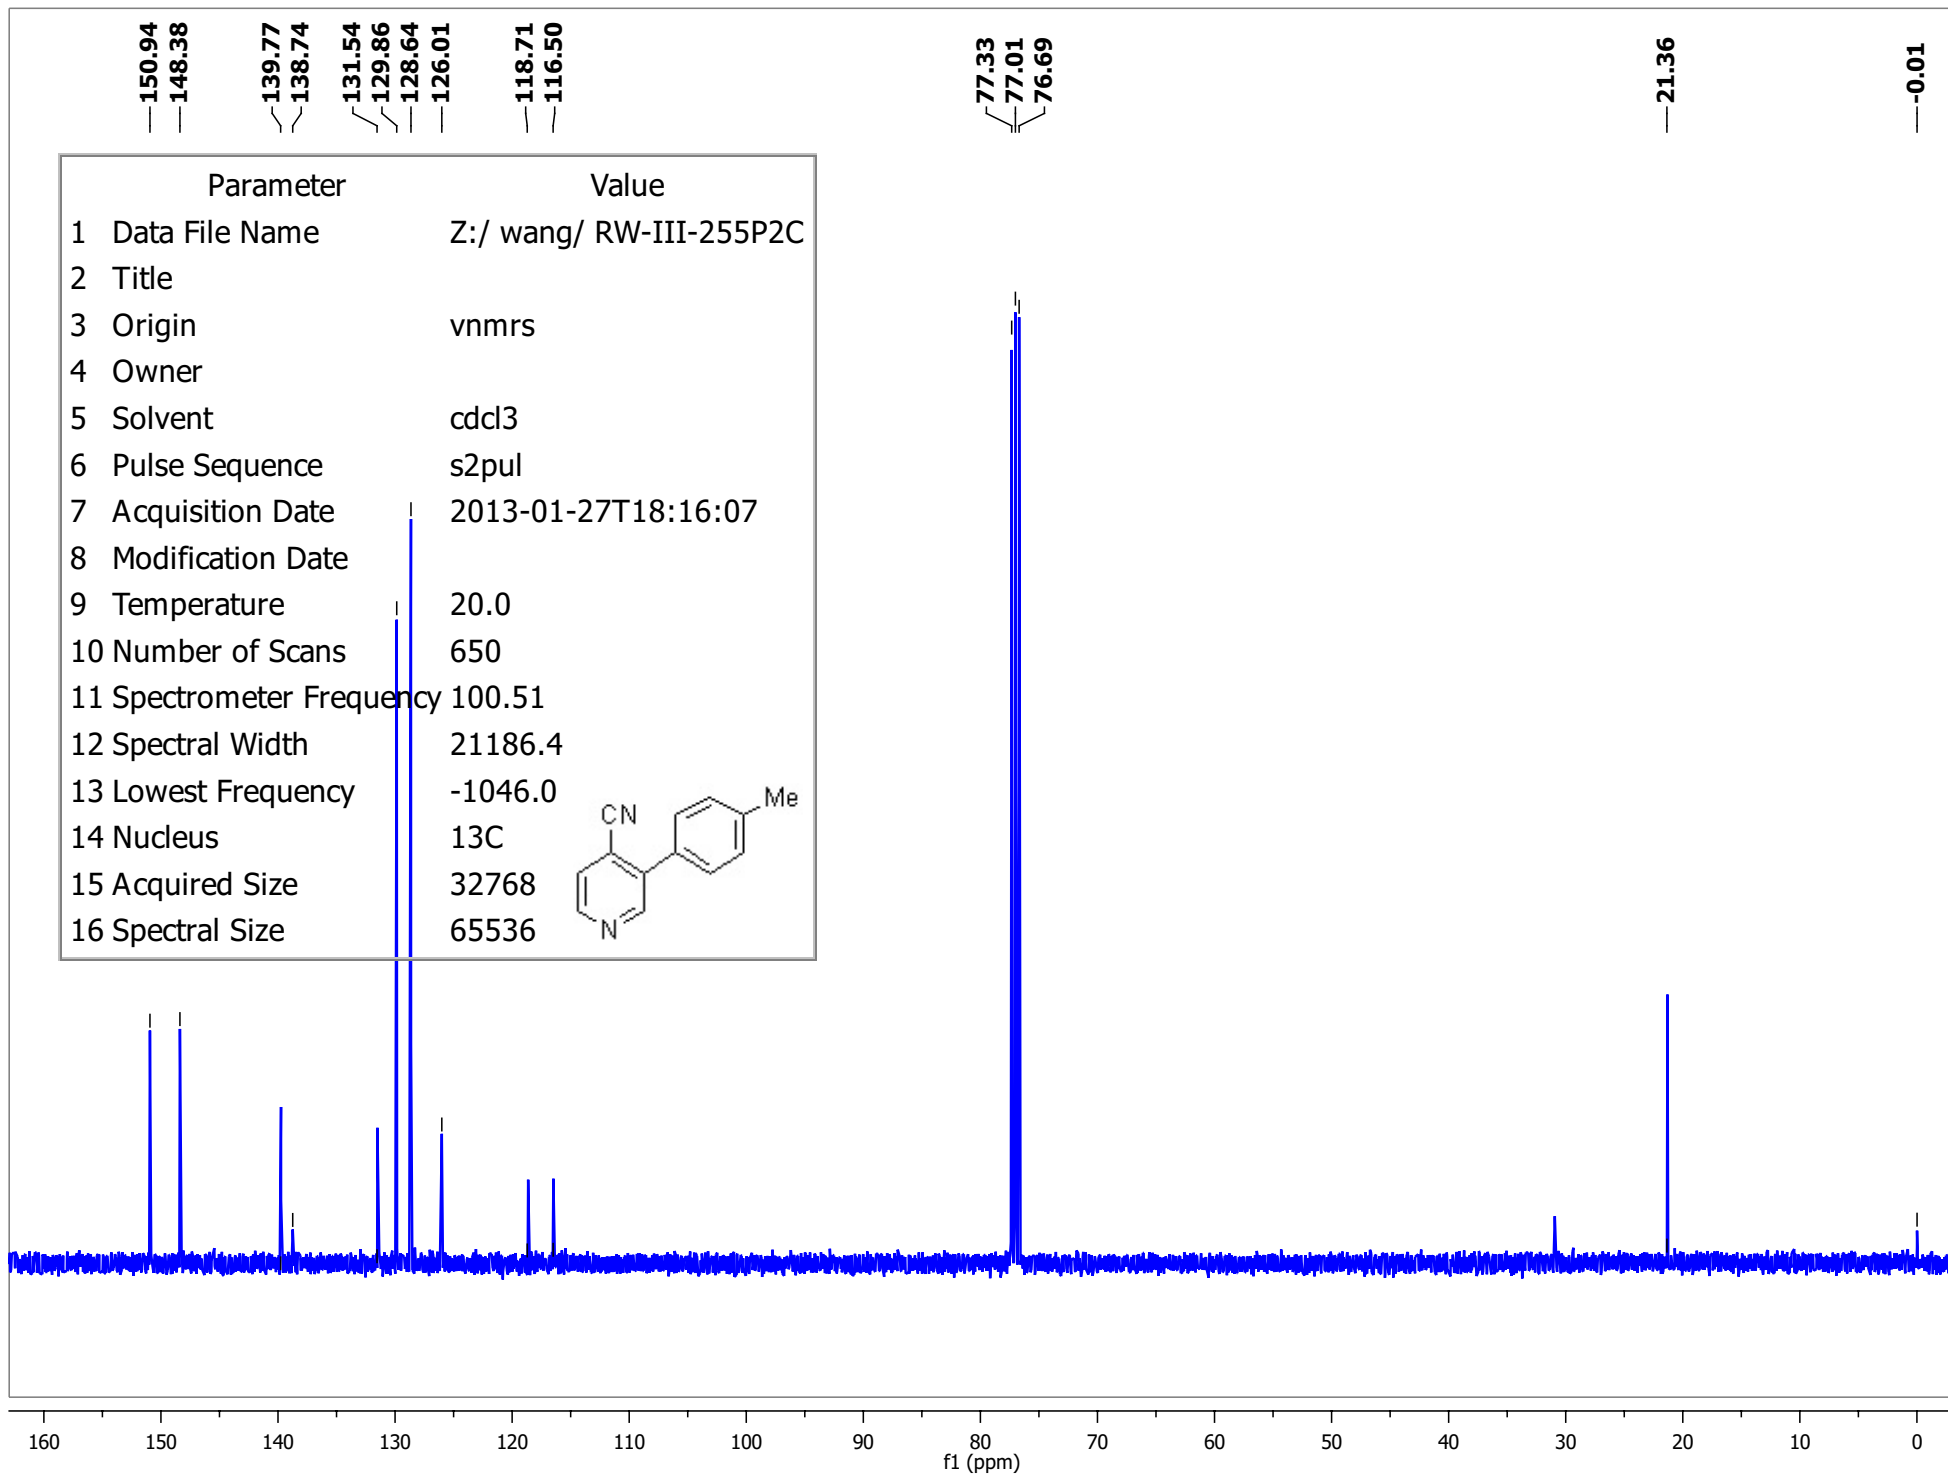

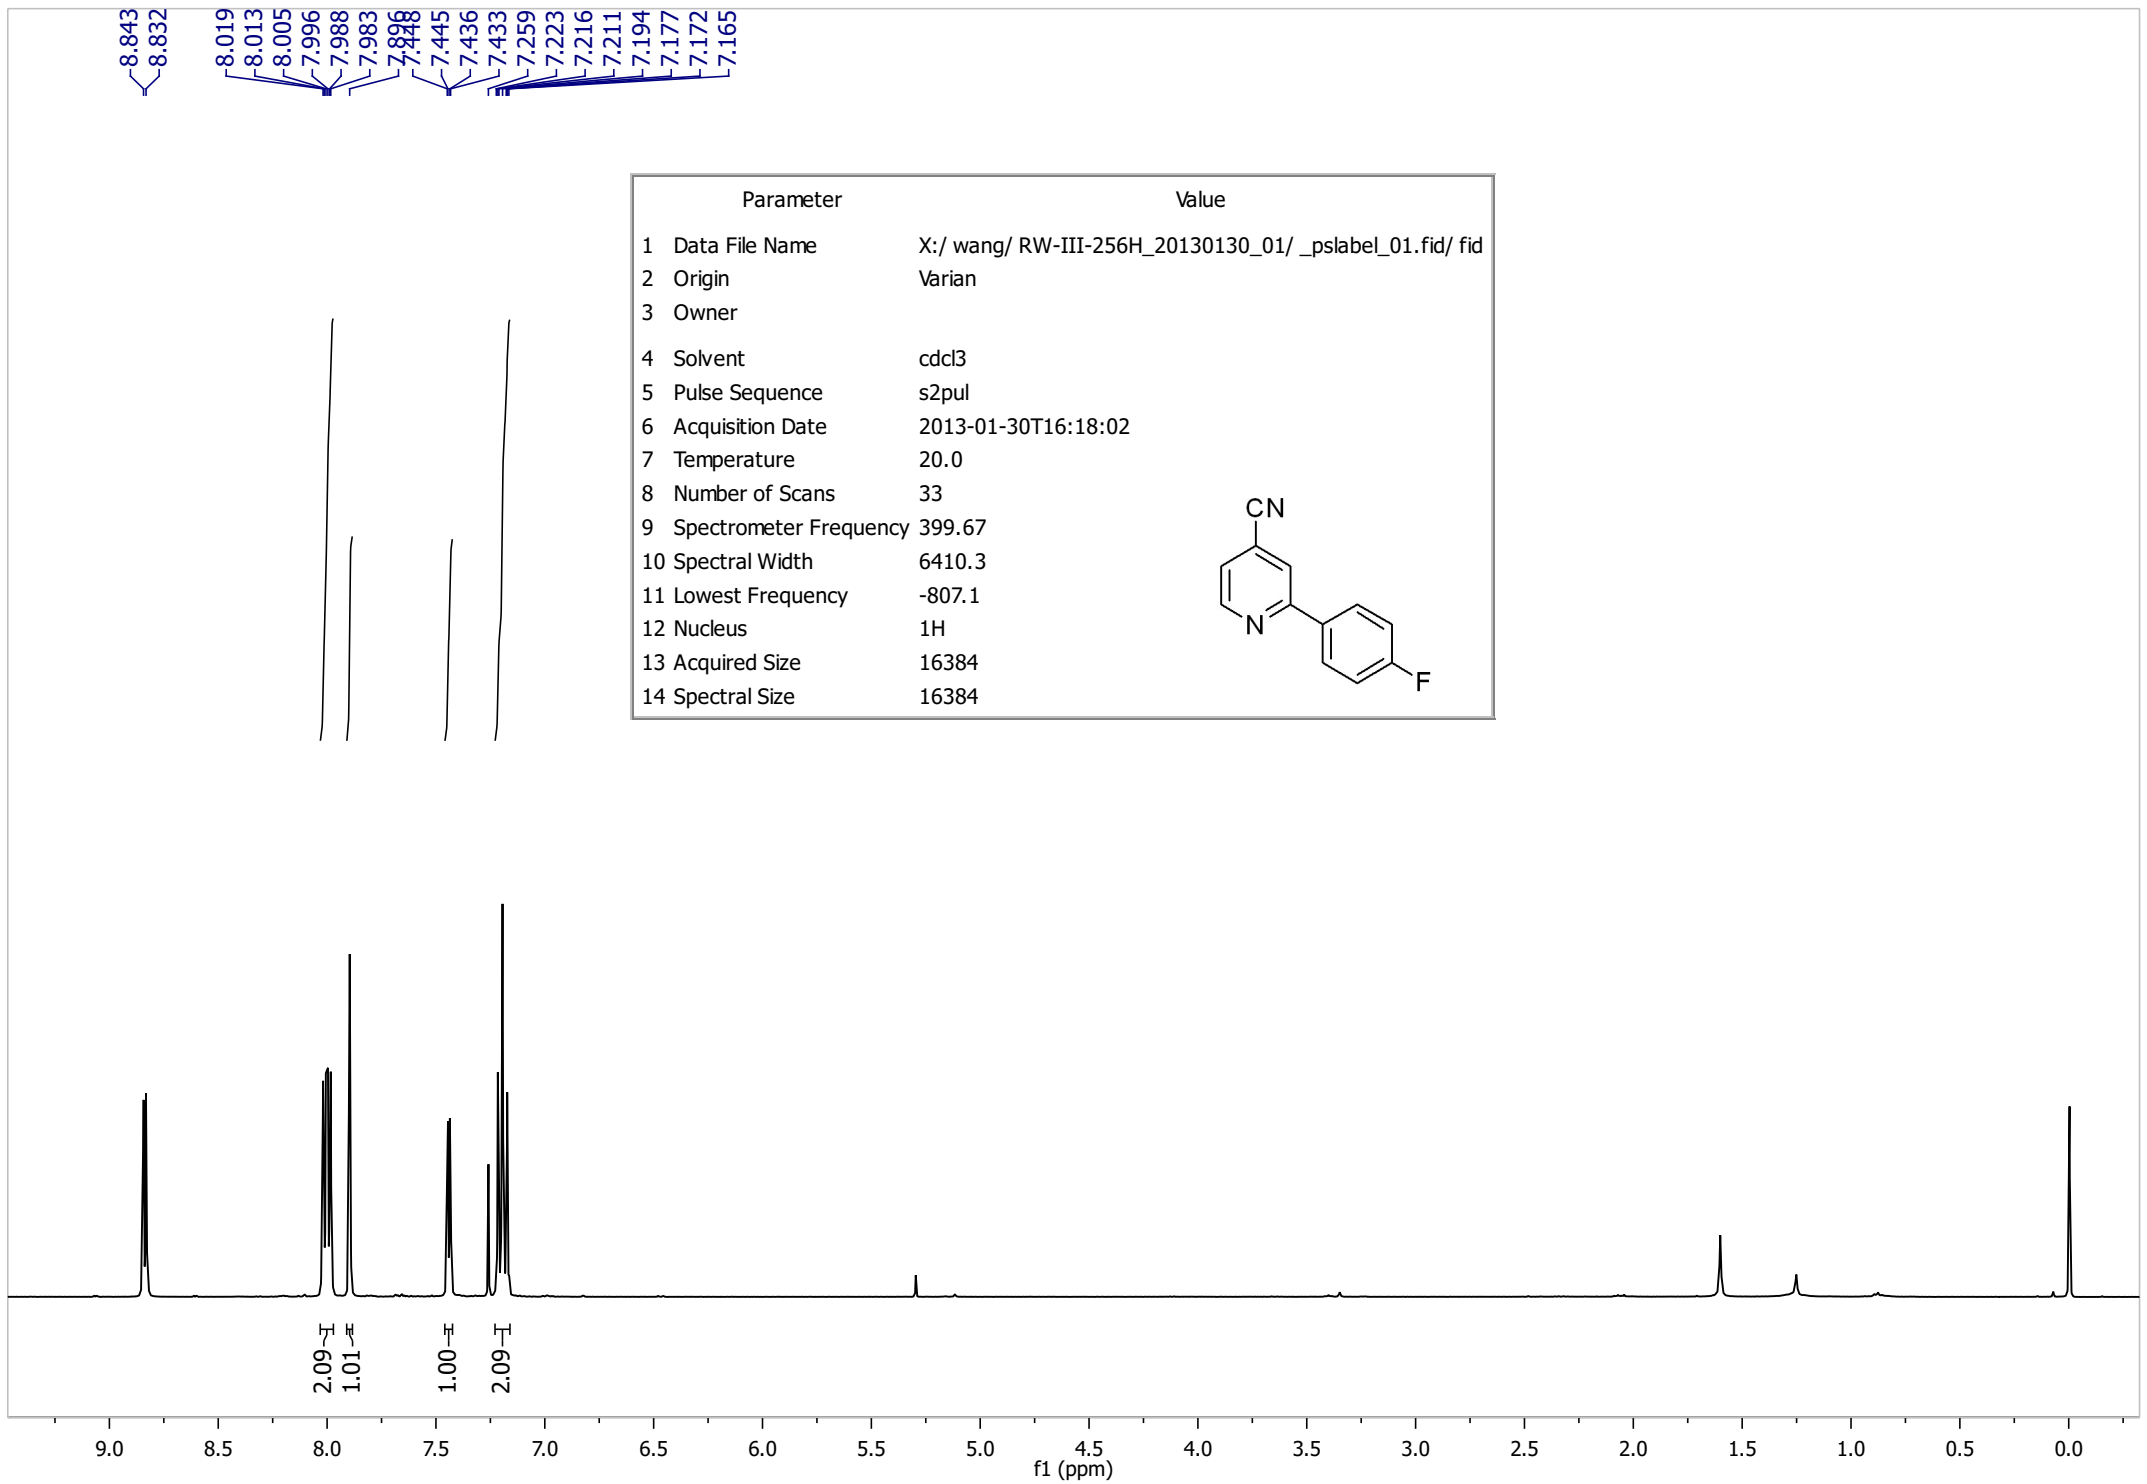

8.843  
8.832  
8.019  
8.013  
8.005  
7.996  
7.988  
7.983  
7.896  
7.888  
7.445  
7.436  
7.433  
7.259  
7.223  
7.216  
7.211  
7.194  
7.177  
7.172  
7.165

| Parameter                | Value                                                  |
|--------------------------|--------------------------------------------------------|
| 1 Data File Name         | X:/ wang/ RW-III-256H_20130130_01/_pslabel_01.fid/ fid |
| 2 Origin                 | Varian                                                 |
| 3 Owner                  |                                                        |
| 4 Solvent                | cdcl3                                                  |
| 5 Pulse Sequence         | s2pul                                                  |
| 6 Acquisition Date       | 2013-01-30T16:18:02                                    |
| 7 Temperature            | 20.0                                                   |
| 8 Number of Scans        | 33                                                     |
| 9 Spectrometer Frequency | 399.67                                                 |
| 10 Spectral Width        | 6410.3                                                 |
| 11 Lowest Frequency      | -807.1                                                 |
| 12 Nucleus               | 1H                                                     |
| 13 Acquired Size         | 16384                                                  |
| 14 Spectral Size         | 16384                                                  |

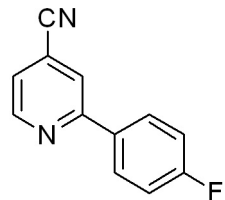

2.09  
1.01  
1.00  
2.09

f1 (ppm)

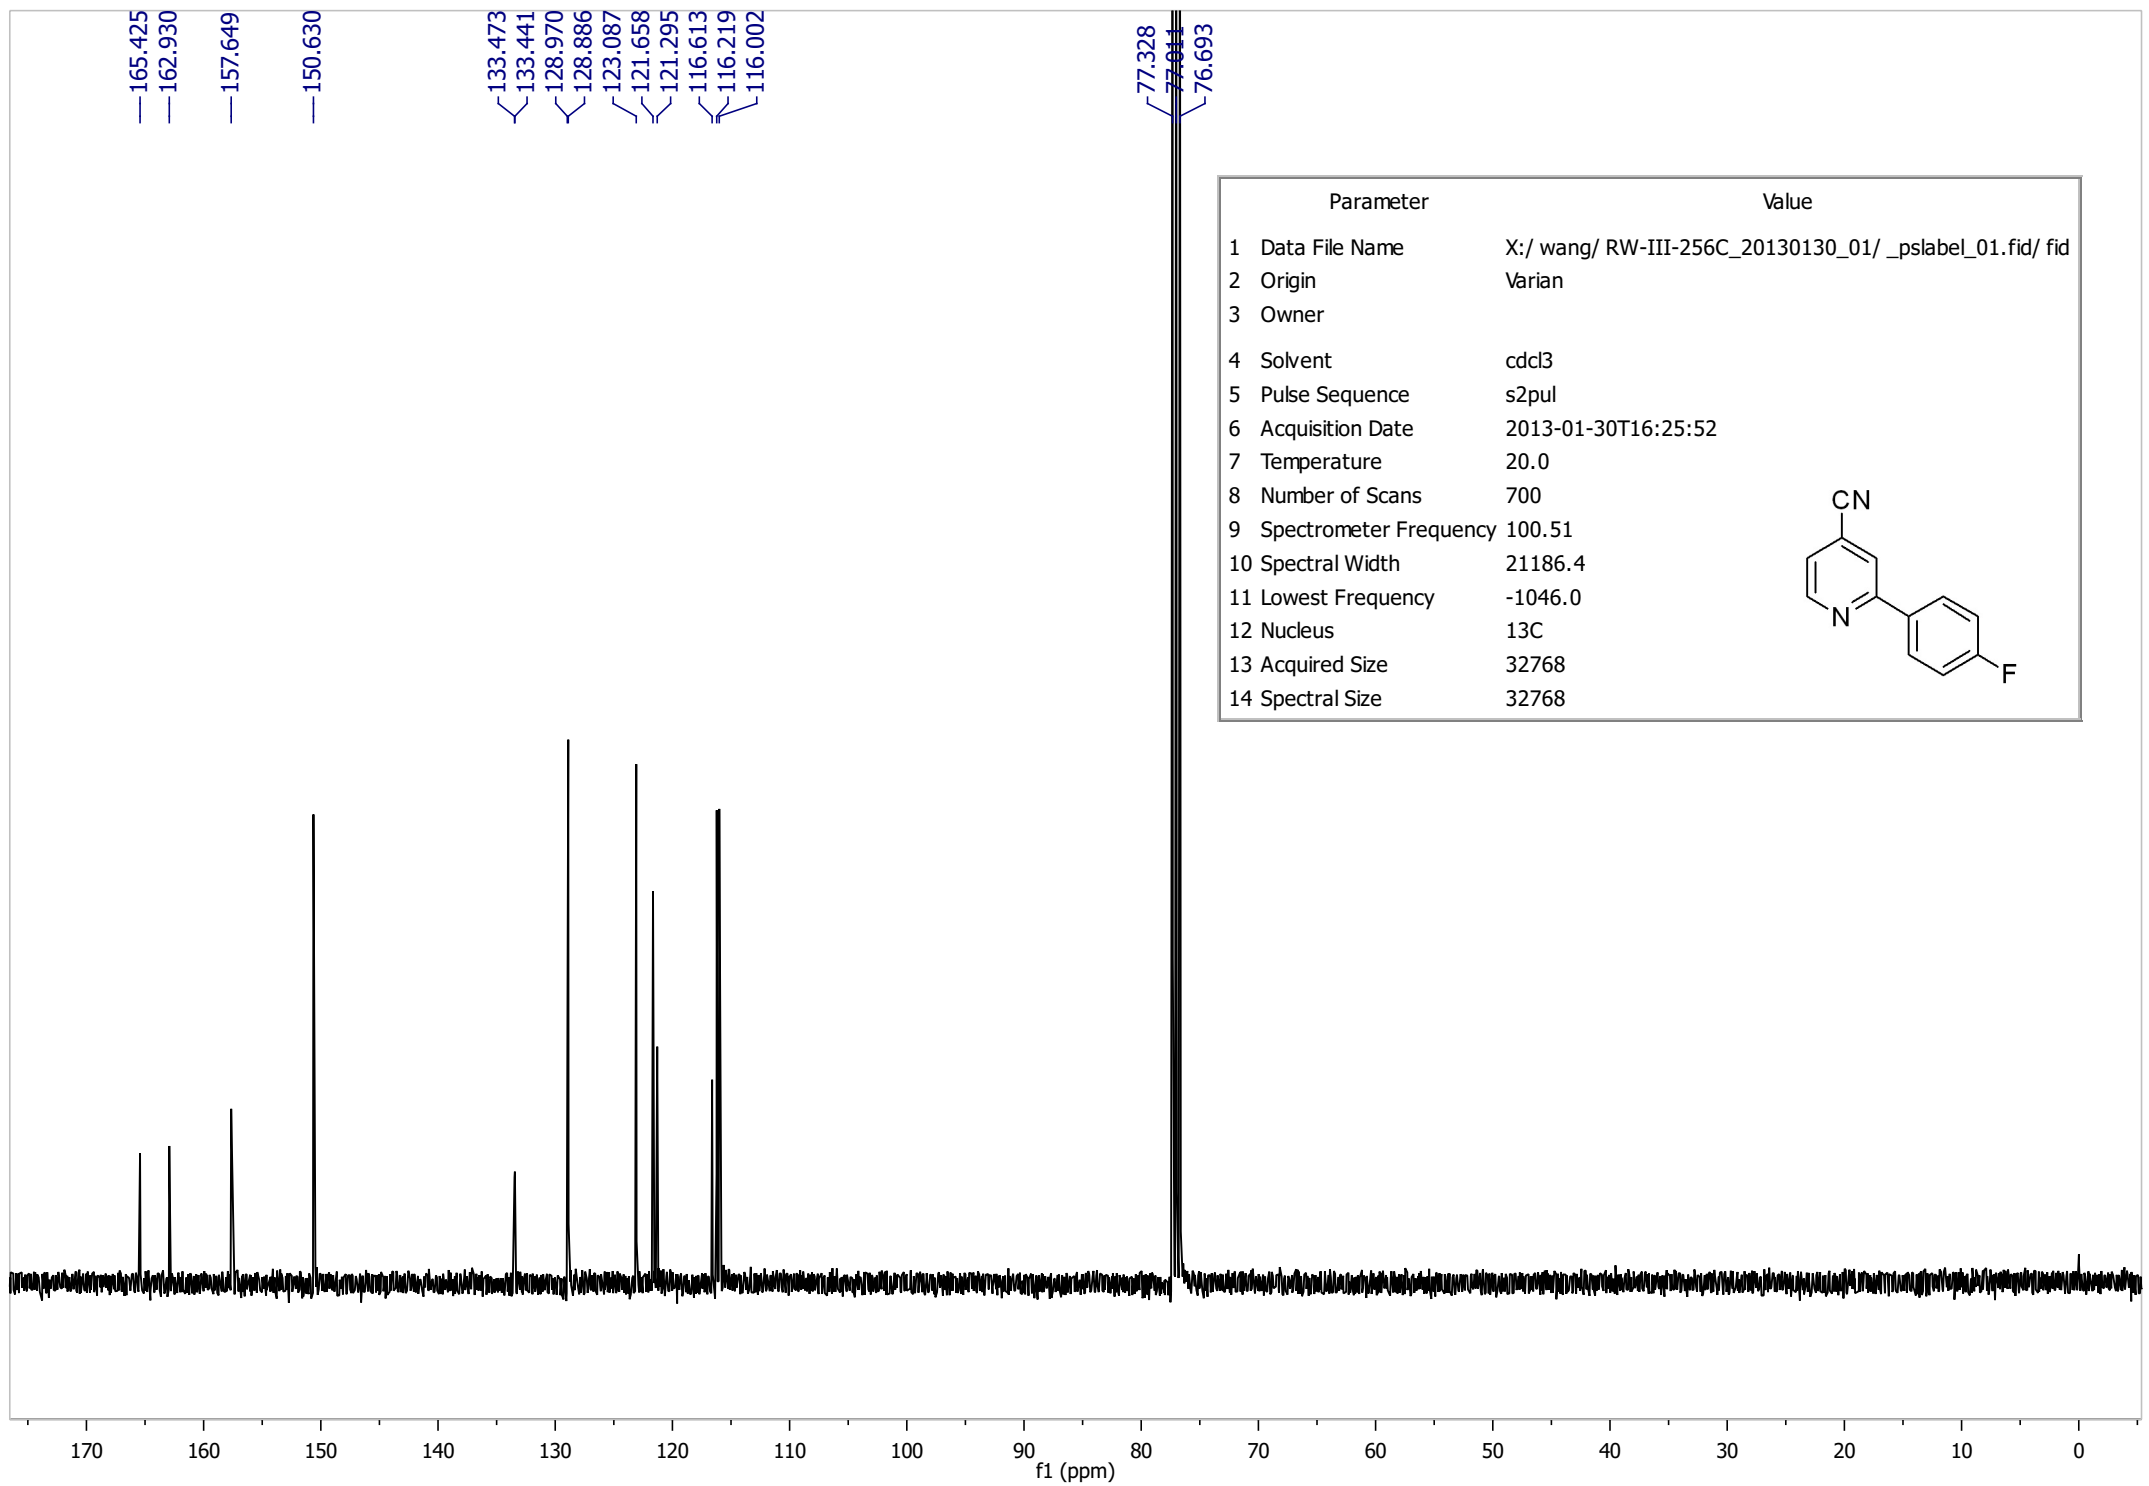

— 165.425  
 — 162.930  
 — 157.649  
 — 150.630

133.473  
 133.441  
 128.970  
 128.886  
 123.087  
 121.658  
 121.295  
 116.613  
 116.219  
 116.002

77.328  
 77.011  
 76.693

| Parameter                | Value                                                   |
|--------------------------|---------------------------------------------------------|
| 1 Data File Name         | X:/ wang/ RW-III-256C_20130130_01/ _pslabel_01.fid/ fid |
| 2 Origin                 | Varian                                                  |
| 3 Owner                  |                                                         |
| 4 Solvent                | cdcl3                                                   |
| 5 Pulse Sequence         | s2pul                                                   |
| 6 Acquisition Date       | 2013-01-30T16:25:52                                     |
| 7 Temperature            | 20.0                                                    |
| 8 Number of Scans        | 700                                                     |
| 9 Spectrometer Frequency | 100.51                                                  |
| 10 Spectral Width        | 21186.4                                                 |
| 11 Lowest Frequency      | -1046.0                                                 |
| 12 Nucleus               | 13C                                                     |
| 13 Acquired Size         | 32768                                                   |
| 14 Spectral Size         | 32768                                                   |

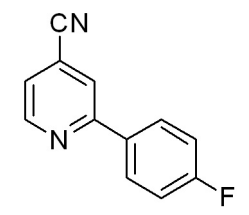

8.85  
8.84

7.96  
7.94  
7.91

7.46  
7.45  
7.26

| Parameter                 | Value                   |
|---------------------------|-------------------------|
| 1 Data File Name          | Z:/ wang/ RW-III-261P2H |
| 2 Title                   |                         |
| 3 Origin                  | vnmrs                   |
| 4 Owner                   |                         |
| 5 Solvent                 | cdcl3                   |
| 6 Pulse Sequence          | s2pul                   |
| 7 Acquisition Date        | 2013-02-02T23:07:42     |
| 8 Modification Date       |                         |
| 9 Temperature             | 20.0                    |
| 10 Number of Scans        | 33                      |
| 11 Spectrometer Frequency | 399.67                  |
| 12 Spectral Width         | 6410.3                  |
| 13 Lowest Frequency       | -807.1                  |
| 14 Nucleus                | 1H                      |
| 15 Acquired Size          | 16384                   |
| 16 Spectral Size          | 32768                   |

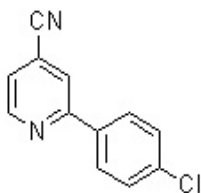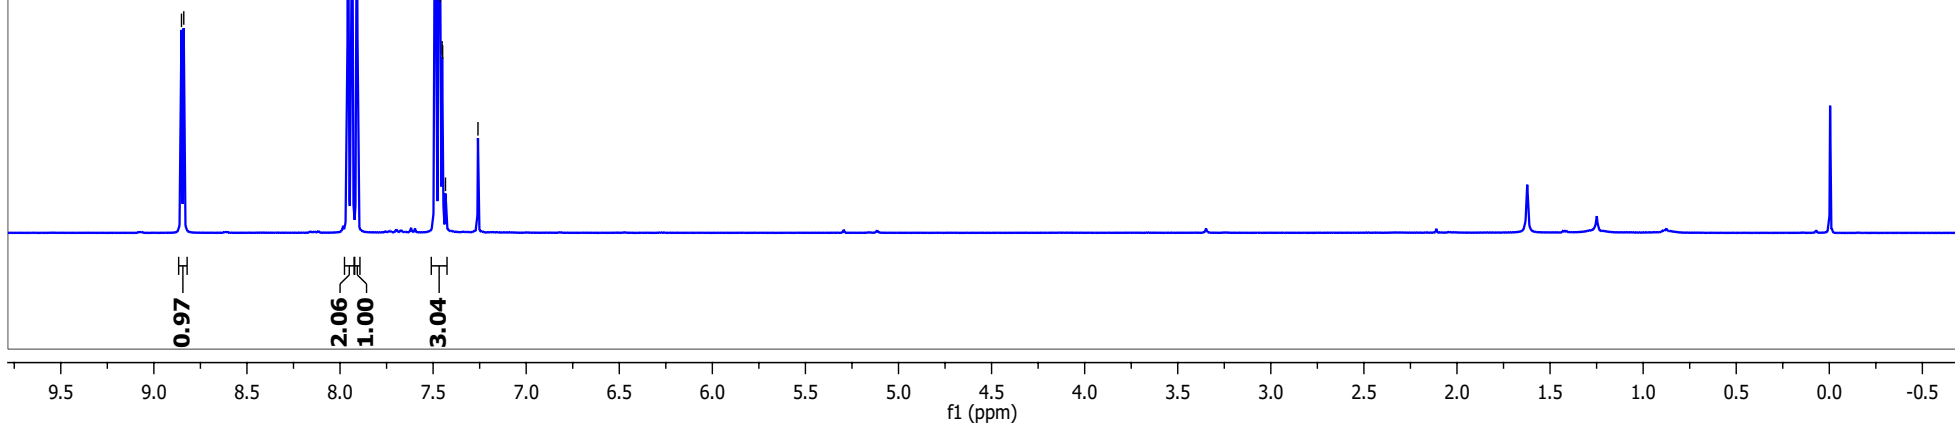

157.47

150.70

136.53

135.67

129.34

128.21

123.41

121.76

121.35

116.55

77.34

77.02

76.70

| Parameter                 | Value                   |
|---------------------------|-------------------------|
| 1 Data File Name          | Z:/ wang/ RW-III-261P2C |
| 2 Title                   |                         |
| 3 Origin                  | vnmrs                   |
| 4 Owner                   |                         |
| 5 Solvent                 | cdcl3                   |
| 6 Pulse Sequence          | s2pul                   |
| 7 Acquisition Date        | 2013-02-03T02:24:46     |
| 8 Modification Date       |                         |
| 9 Temperature             | 20.0                    |
| 10 Number of Scans        | 5000                    |
| 11 Spectrometer Frequency | 100.51                  |
| 12 Spectral Width         | 25510.2                 |
| 13 Lowest Frequency       | -966.7                  |
| 14 Nucleus                | 13C                     |
| 15 Acquired Size          | 32768                   |
| 16 Spectral Size          | 65536                   |

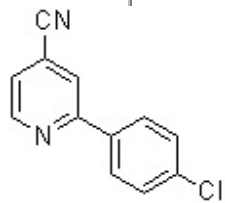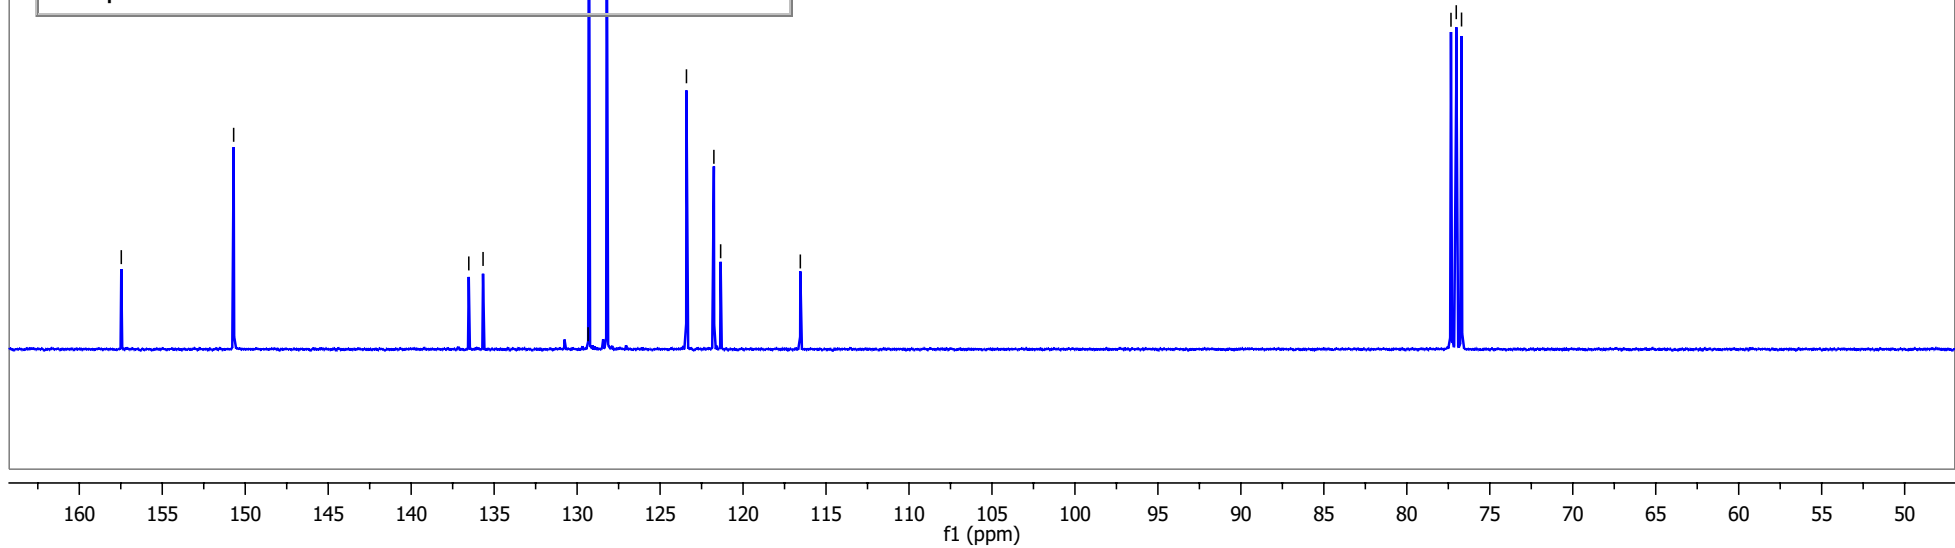



8.80  
8.80  
8.79  
8.79

7.95  
7.94  
7.87  
7.87  
7.87

7.35  
7.34  
7.33  
7.26  
7.11  
7.11  
7.10  
7.09  
7.08  
7.08

— 5.14

| Parameter                 | Value                  |
|---------------------------|------------------------|
| 1 Data File Name          | Z:/ wang/ RW-III-266P1 |
| 2 Title                   |                        |
| 3 Origin                  | vnmrs                  |
| 4 Owner                   |                        |
| 5 Solvent                 | cdcl3                  |
| 6 Pulse Sequence          | s2pul                  |
| 7 Acquisition Date        | 2013-02-08T00:30:52    |
| 8 Modification Date       |                        |
| 9 Temperature             | 20.0                   |
| 10 Number of Scans        | 33                     |
| 11 Spectrometer Frequency | 399.67                 |
| 12 Spectral Width         | 6410.3                 |
| 13 Lowest Frequency       | -807.1                 |
| 14 Nucleus                | 1H                     |
| 15 Acquired Size          | 16384                  |
| 16 Spectral Size          | 32768                  |

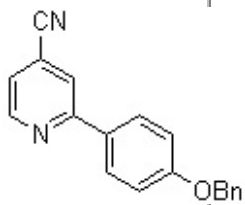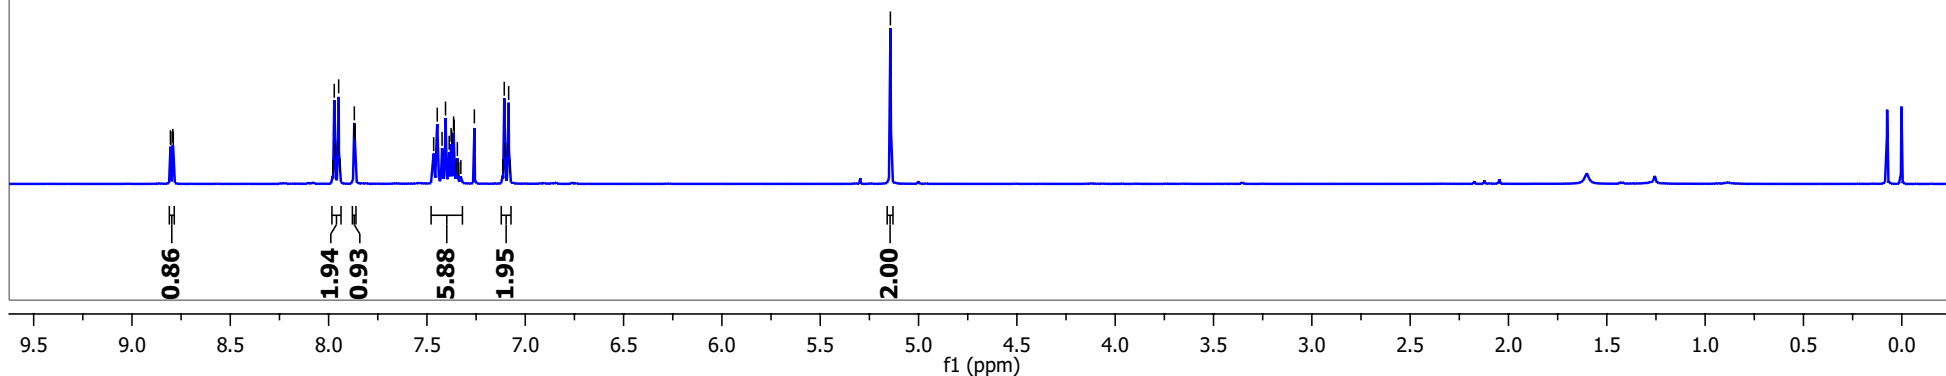

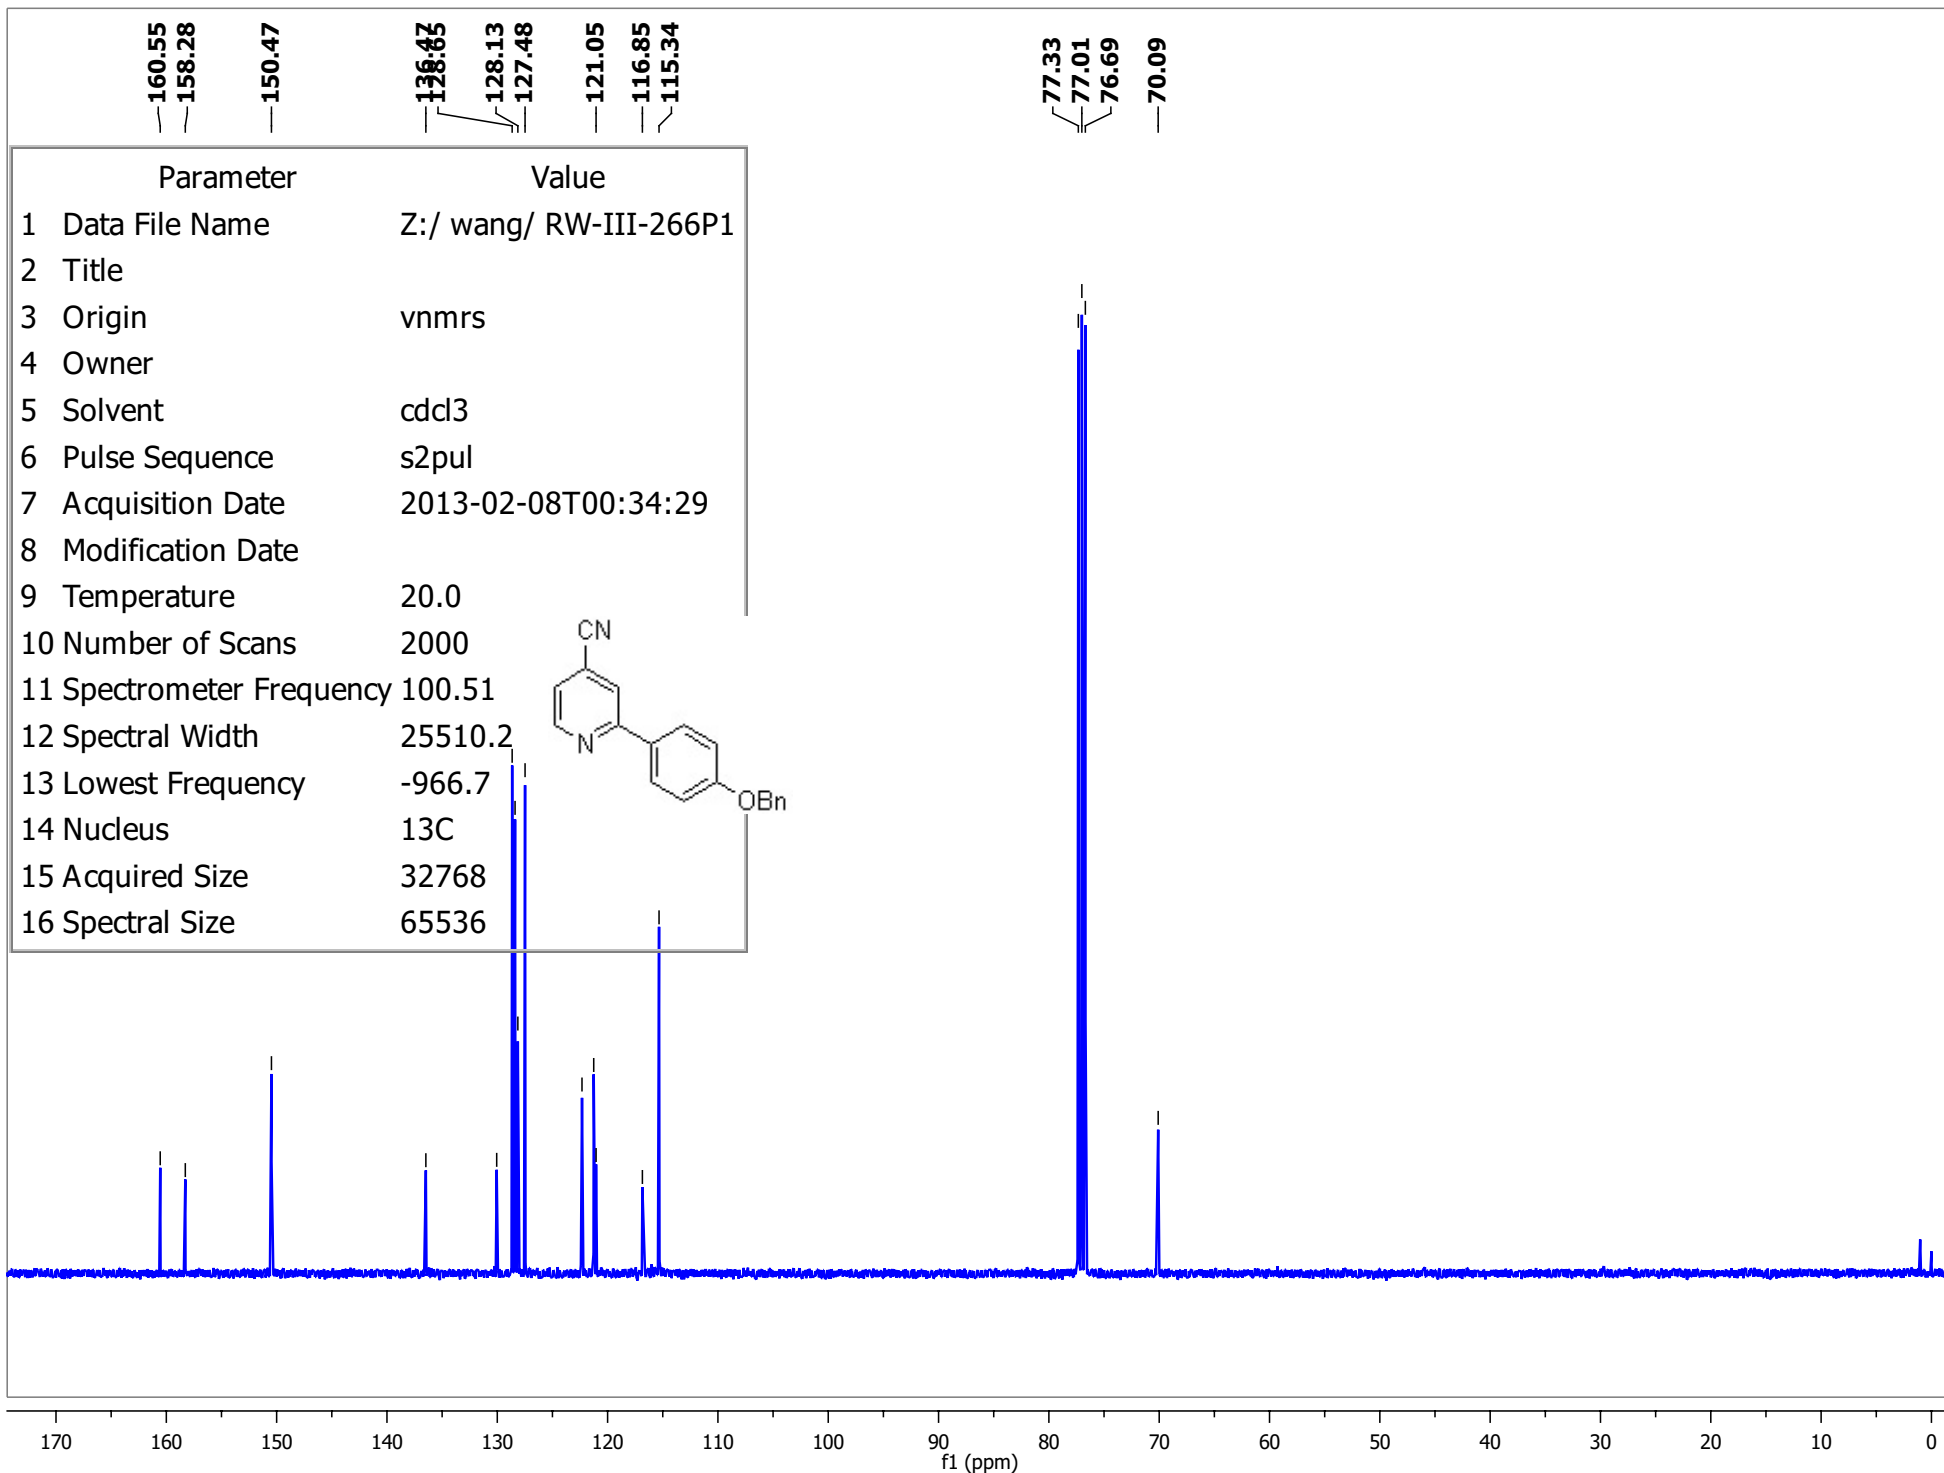

8.84  
8.70  
8.69  
7.60  
7.54  
7.53  
7.48  
7.45  
7.43  
7.42  
7.40  
7.37  
7.36  
7.35  
7.26  
7.15  
7.13  
7.12

5.14

| Parameter                 | Value                |
|---------------------------|----------------------|
| 1 Data File Name          | Z:/wang/RW-III-266P2 |
| 2 Title                   |                      |
| 3 Origin                  | vnmrs                |
| 4 Owner                   |                      |
| 5 Solvent                 | cdcl3                |
| 6 Pulse Sequence          | s2pul                |
| 7 Acquisition Date        | 2013-02-08T01:53:30  |
| 8 Modification Date       |                      |
| 9 Temperature             | 20.0                 |
| 10 Number of Scans        | 33                   |
| 11 Spectrometer Frequency | 399.67               |
| 12 Spectral Width         | 6410.3               |
| 13 Lowest Frequency       | -807.1               |
| 14 Nucleus                | 1H                   |
| 15 Acquired Size          | 16384                |
| 16 Spectral Size          | 32768                |

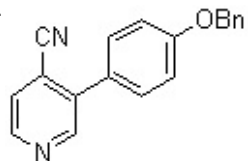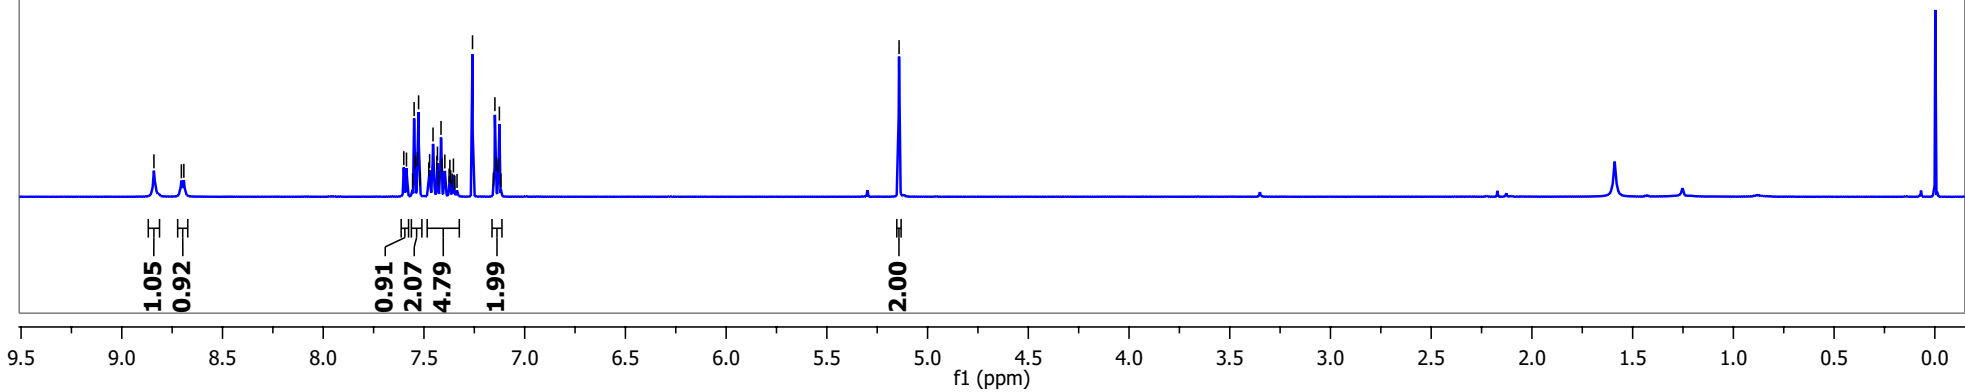

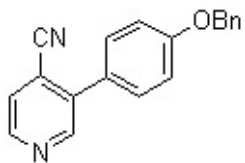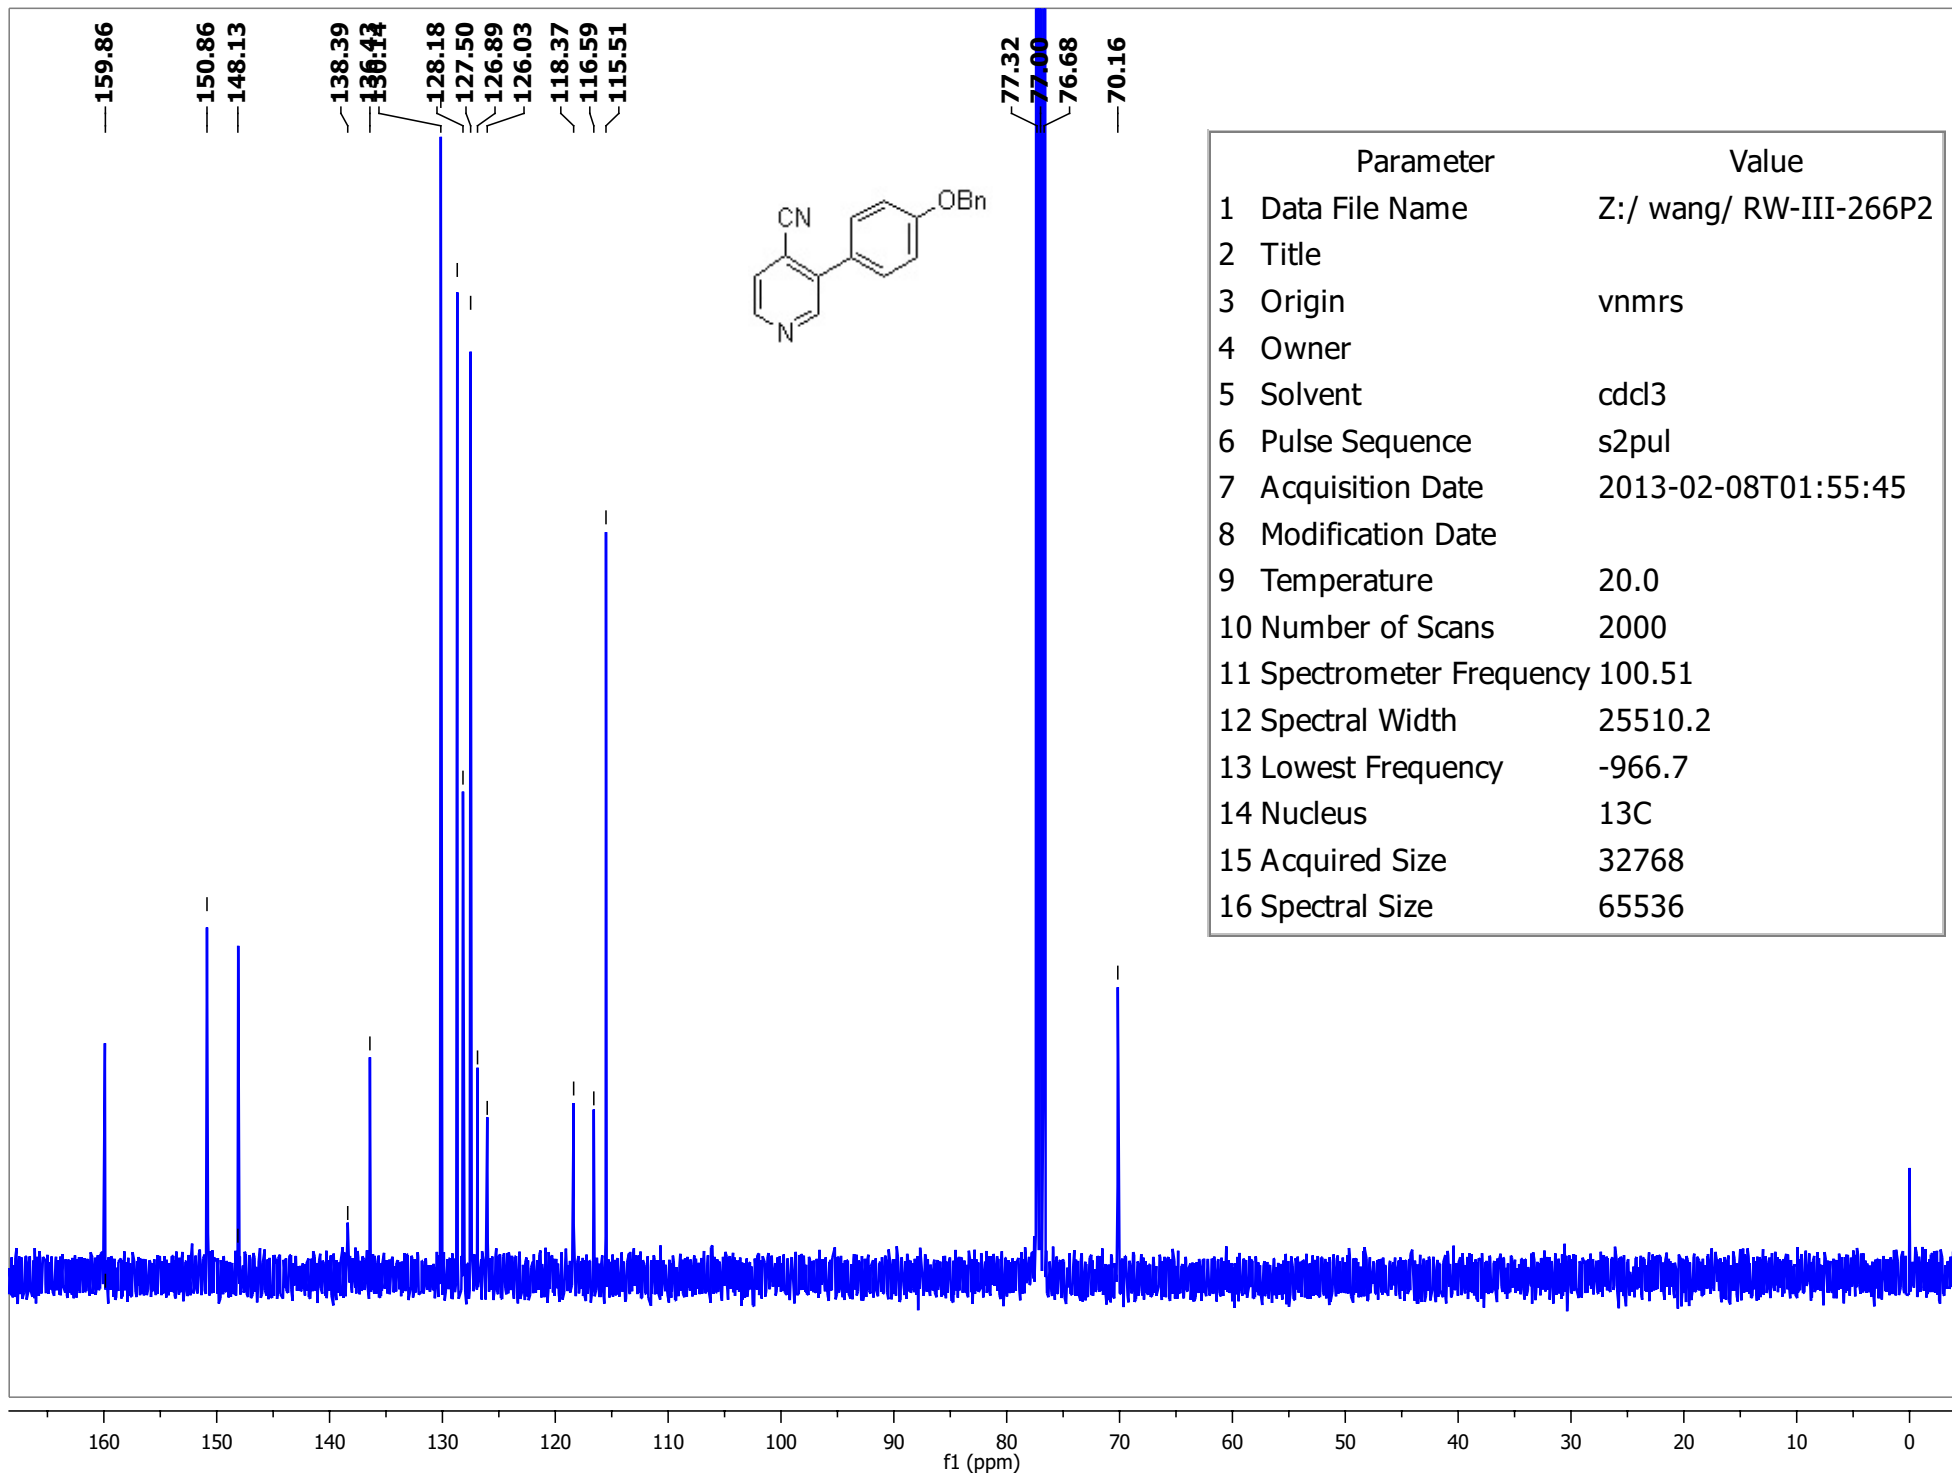

8.92  
8.90  
8.12  
7.95  
7.93  
7.84  
7.83  
7.60  
7.52  
7.26

| Parameter                 | Value                  |
|---------------------------|------------------------|
| 1 Data File Name          | Z:/ wang/ RW-III-264P1 |
| 2 Title                   |                        |
| 3 Origin                  | vnmrs                  |
| 4 Owner                   |                        |
| 5 Solvent                 | cdcl3                  |
| 6 Pulse Sequence          | s2pul                  |
| 7 Acquisition Date        | 2013-02-07T22:01:33    |
| 8 Modification Date       |                        |
| 9 Temperature             | 20.0                   |
| 10 Number of Scans        | 33                     |
| 11 Spectrometer Frequency | 399.67                 |
| 12 Spectral Width         | 6410.3                 |
| 13 Lowest Frequency       | -807.1                 |
| 14 Nucleus                | 1H                     |
| 15 Acquired Size          | 16384                  |
| 16 Spectral Size          | 32768                  |

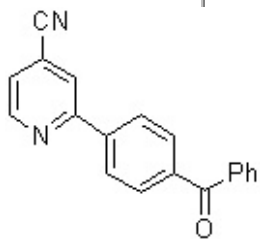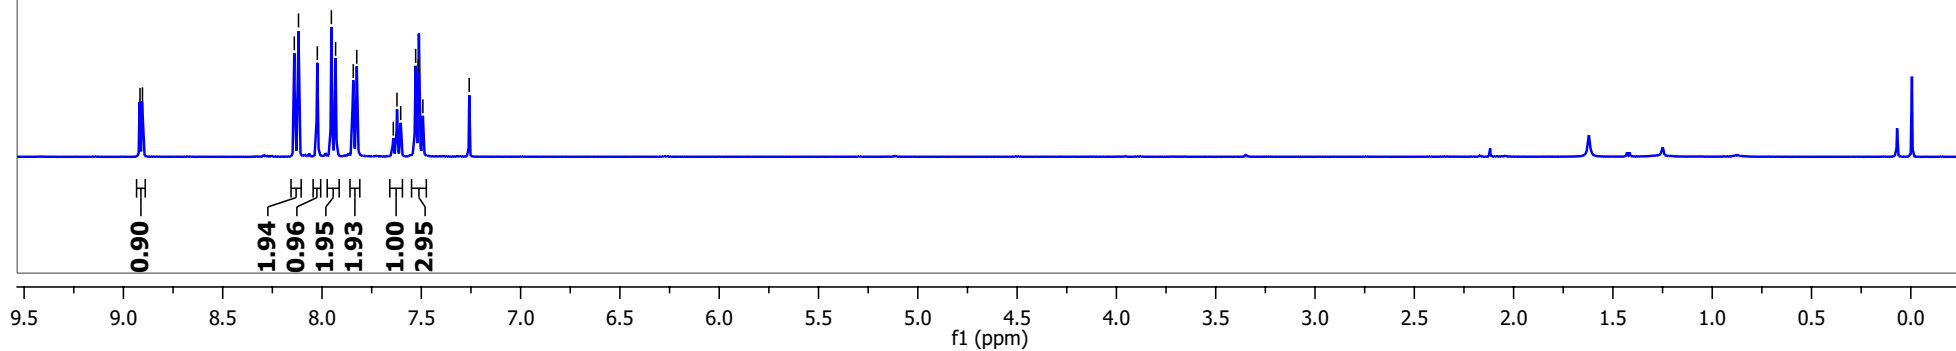

196.06

157.55

150.87

140.70

138.81

137.27

130.72

128.41

123.94

121.47

116.48

77.33

77.01

76.70

-0.01

Parameter

Value

|    |                        |                        |
|----|------------------------|------------------------|
| 1  | Data File Name         | Z:/ wang/ RW-III-264P1 |
| 2  | Title                  |                        |
| 3  | Origin                 | vnmrs                  |
| 4  | Owner                  |                        |
| 5  | Solvent                | cdcl3                  |
| 6  | Pulse Sequence         | s2pul                  |
| 7  | Acquisition Date       | 2013-02-07T22:03:50    |
| 8  | Modification Date      |                        |
| 9  | Temperature            | 20.0                   |
| 10 | Number of Scans        | 700                    |
| 11 | Spectrometer Frequency | 100.51                 |
| 12 | Spectral Width         | 25510.2                |
| 13 | Lowest Frequency       | -966.7                 |
| 14 | Nucleus                | 13C                    |
| 15 | Acquired Size          | 32768                  |
| 16 | Spectral Size          | 65536                  |

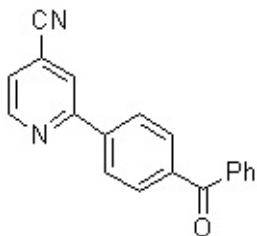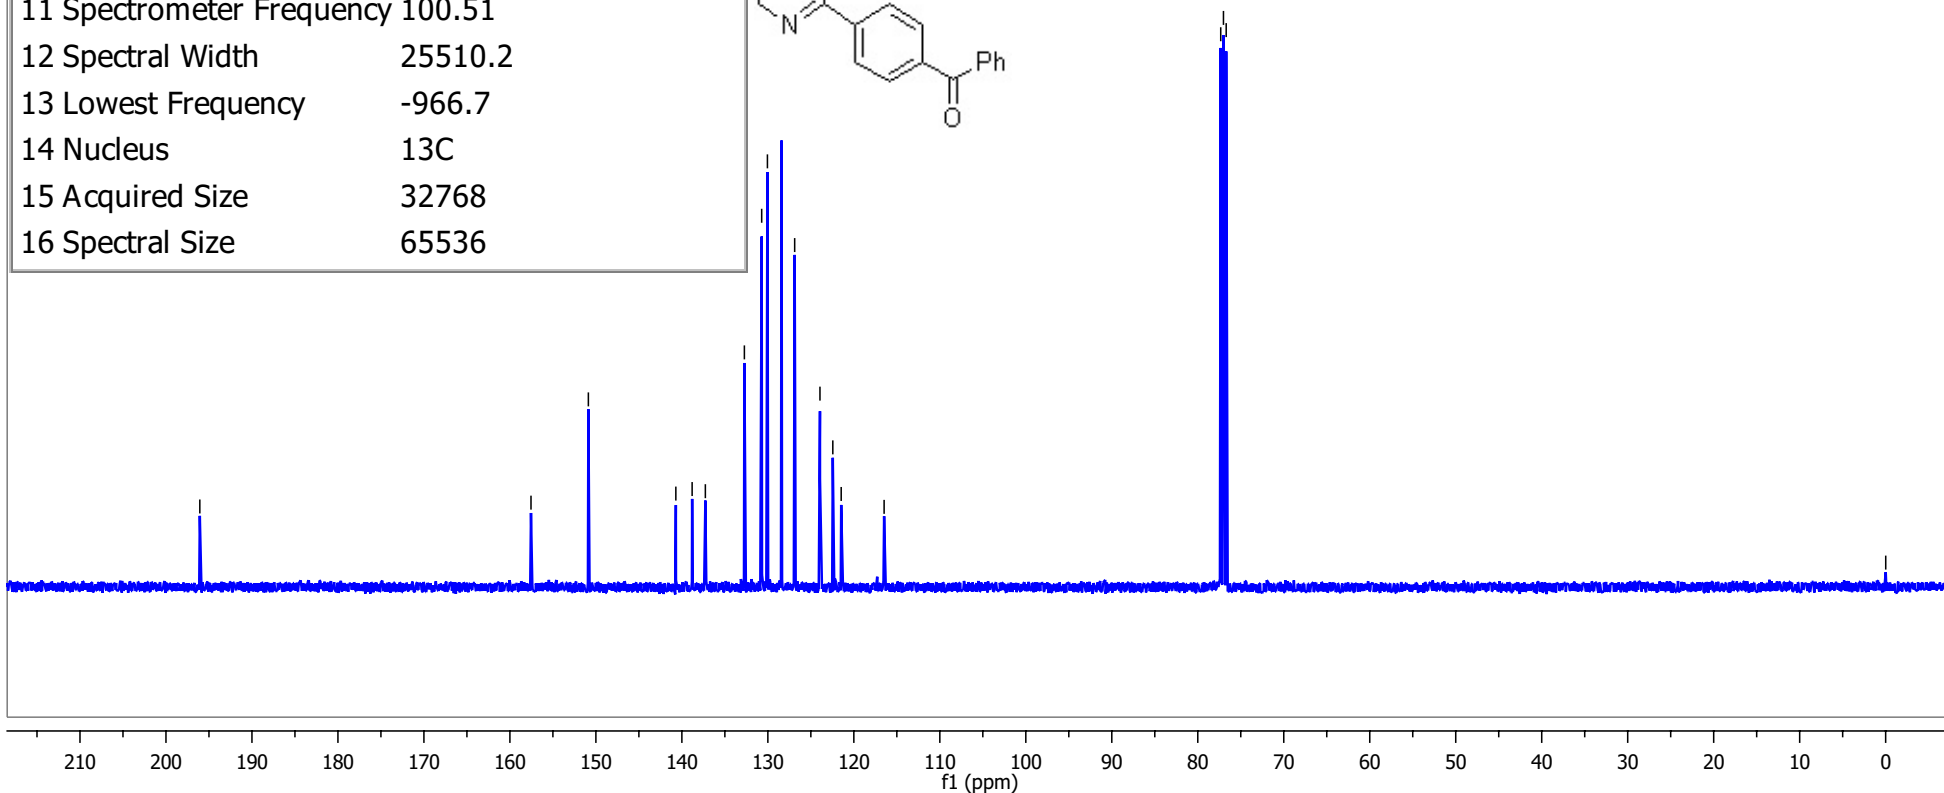

8.92  
8.83  
8.82  
7.99  
7.85  
7.71  
7.67  
7.63  
7.54  
7.51  
7.26

| Parameter                 | Value                   |
|---------------------------|-------------------------|
| 1 Data File Name          | Z:/ wang/ RW-III-264P2H |
| 2 Title                   |                         |
| 3 Origin                  | vnmrs                   |
| 4 Owner                   |                         |
| 5 Solvent                 | cdcl3                   |
| 6 Pulse Sequence          | s2pul                   |
| 7 Acquisition Date        | 2013-02-07T22:33:29     |
| 8 Modification Date       |                         |
| 9 Temperature             | 20.0                    |
| 10 Number of Scans        | 33                      |
| 11 Spectrometer Frequency | 399.67                  |
| 12 Spectral Width         | 6410.3                  |
| 13 Lowest Frequency       | -807.1                  |
| 14 Nucleus                | 1H                      |
| 15 Acquired Size          | 16384                   |
| 16 Spectral Size          | 32768                   |

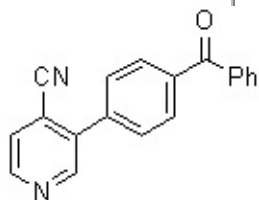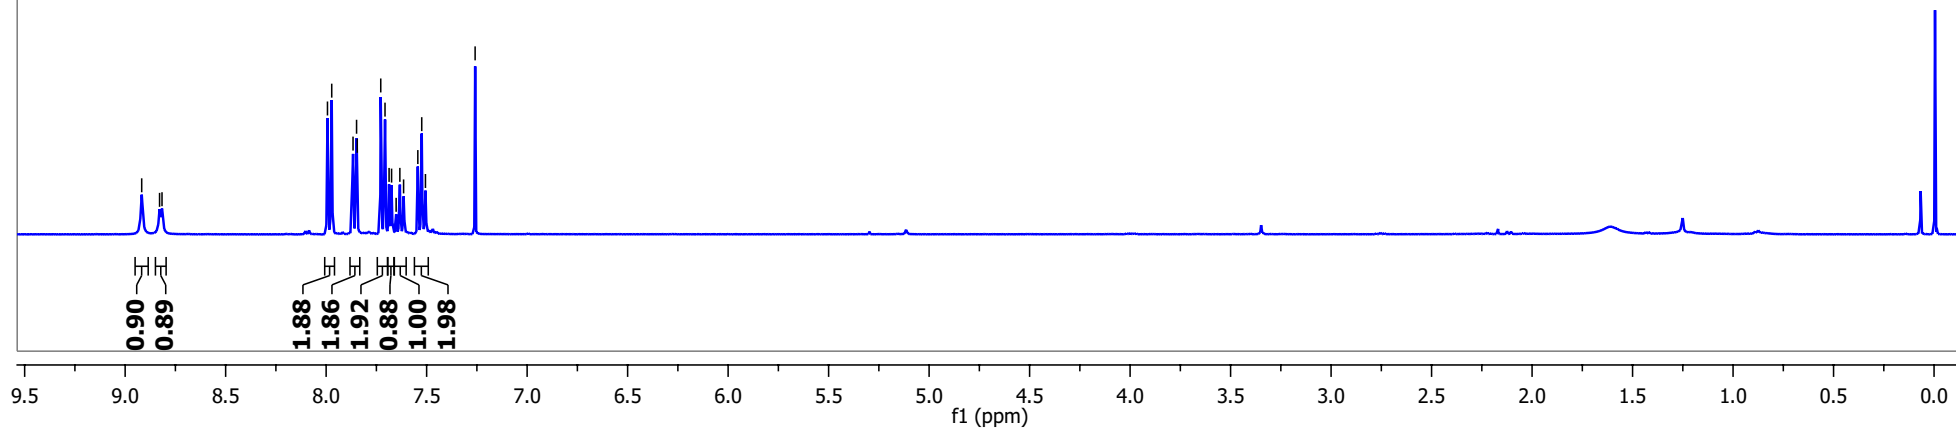

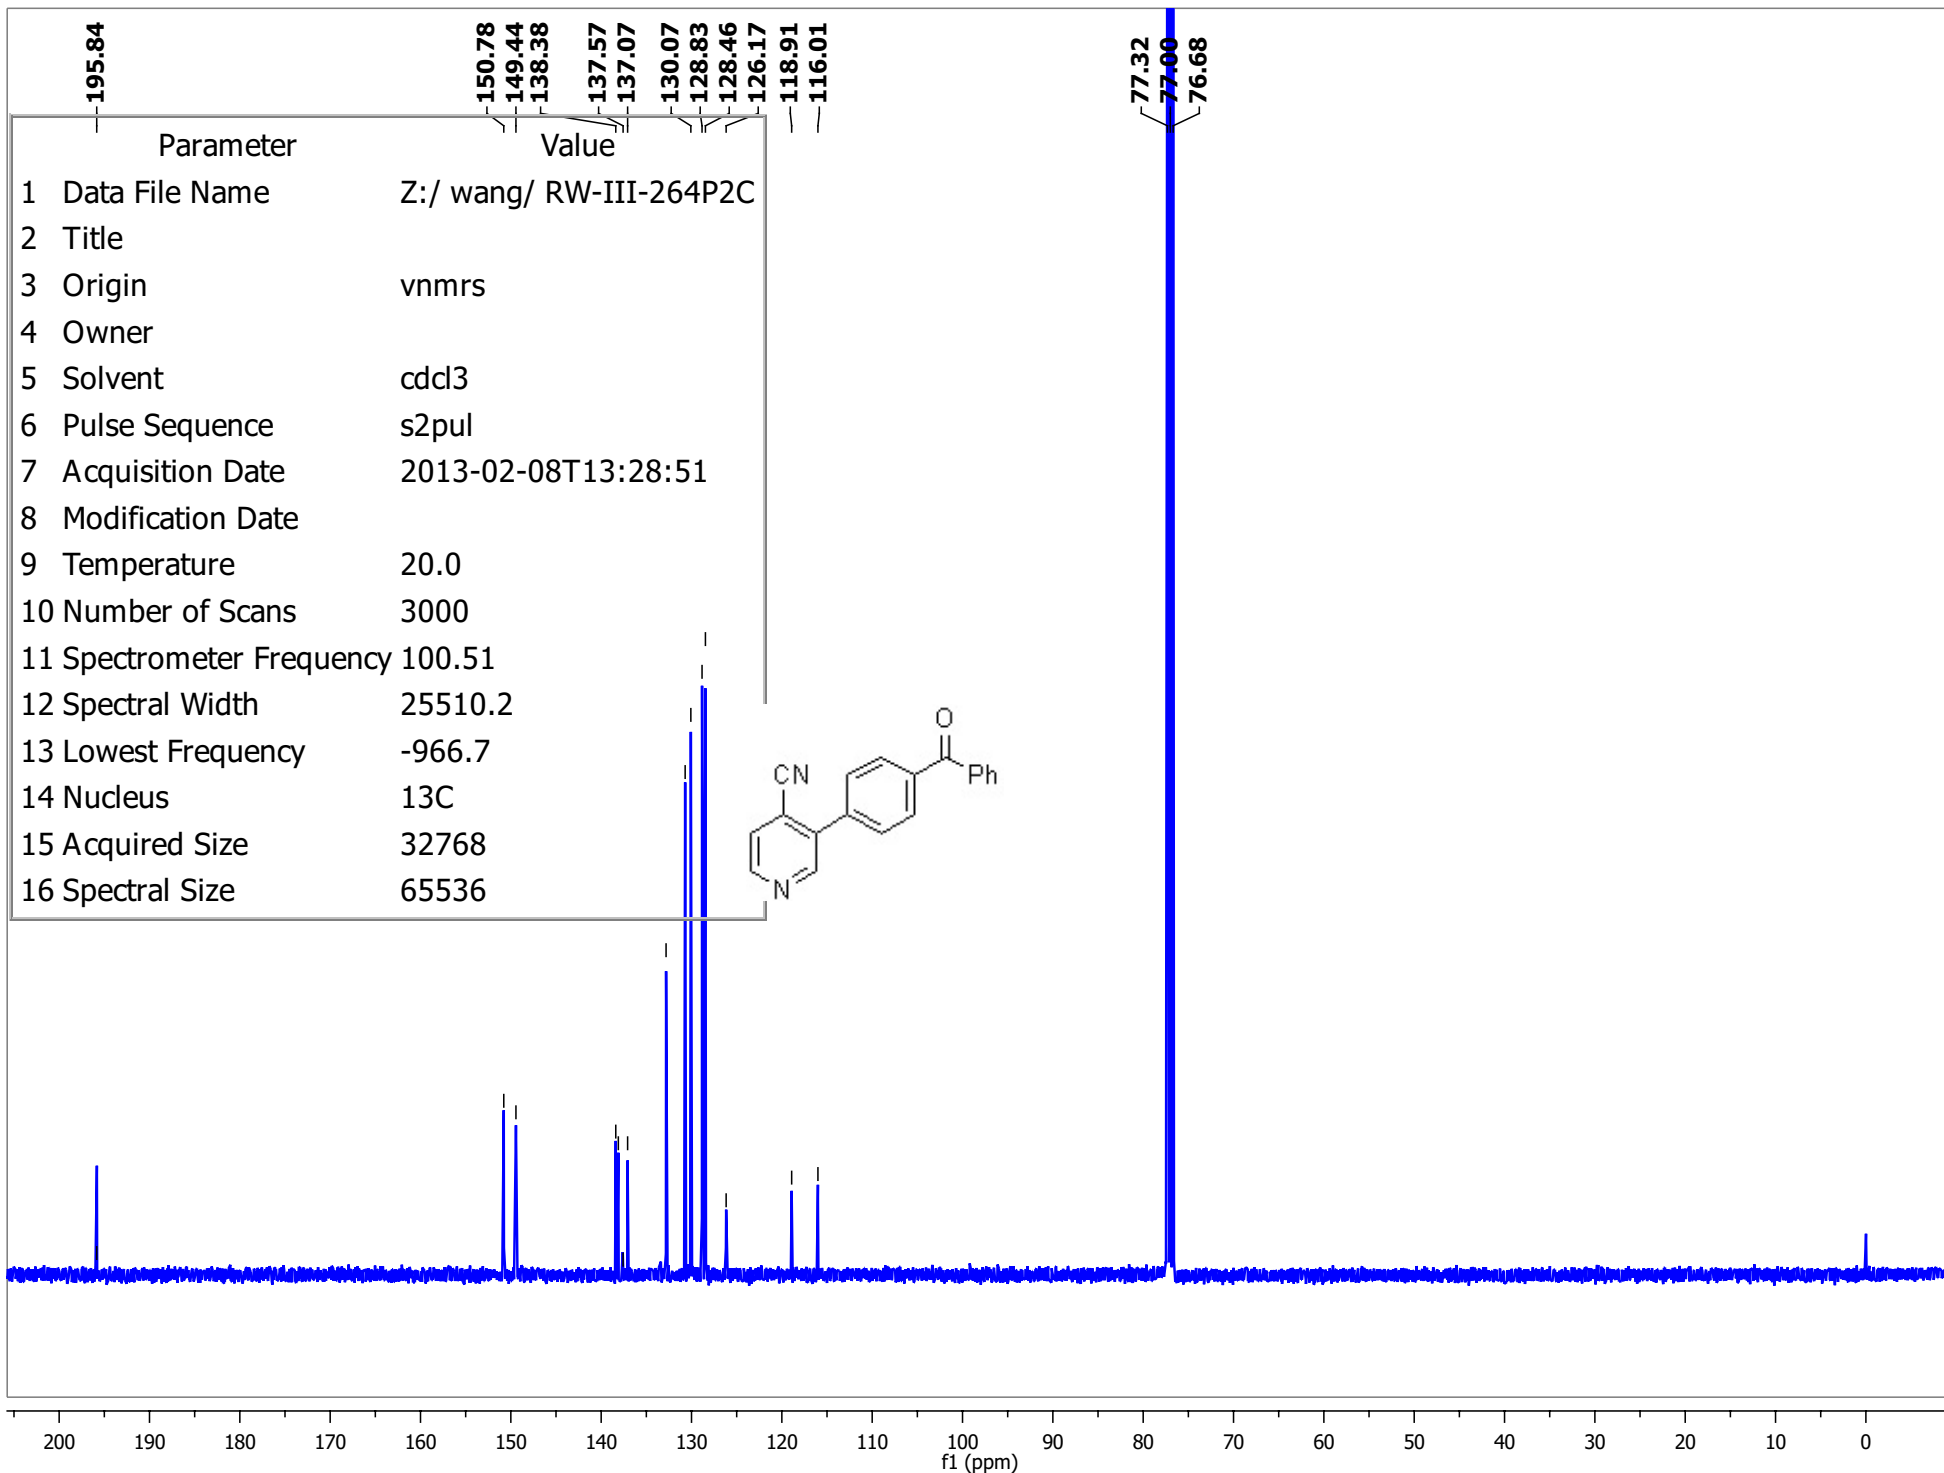

| Parameter                 | Value                   |
|---------------------------|-------------------------|
| 1 Data File Name          | Z:/ wang/ RW-III-264P2C |
| 2 Title                   |                         |
| 3 Origin                  | vnmrs                   |
| 4 Owner                   |                         |
| 5 Solvent                 | cdcl3                   |
| 6 Pulse Sequence          | s2pul                   |
| 7 Acquisition Date        | 2013-02-08T13:28:51     |
| 8 Modification Date       |                         |
| 9 Temperature             | 20.0                    |
| 10 Number of Scans        | 3000                    |
| 11 Spectrometer Frequency | 100.51                  |
| 12 Spectral Width         | 25510.2                 |
| 13 Lowest Frequency       | -966.7                  |
| 14 Nucleus                | 13C                     |
| 15 Acquired Size          | 32768                   |
| 16 Spectral Size          | 65536                   |



8.90  
8.89  
8.19  
8.17  
8.09  
8.07  
8.00  
7.51  
7.50  
7.26

3.96

| Parameter                 | Value                     |
|---------------------------|---------------------------|
| 1 Data File Name          | \\z:/ wang/ RW-III-262P2H |
| 2 Title                   |                           |
| 3 Origin                  | vnmrs                     |
| 4 Owner                   |                           |
| 5 Solvent                 | cdcl3                     |
| 6 Pulse Sequence          | s2pul                     |
| 7 Acquisition Date        | 2013-02-02T23:02:39       |
| 8 Modification Date       |                           |
| 9 Temperature             | 20.0                      |
| 10 Number of Scans        | 34                        |
| 11 Spectrometer Frequency | 399.67                    |
| 12 Spectral Width         | 6410.3                    |
| 13 Lowest Frequency       | -807.1                    |
| 14 Nucleus                | 1H                        |
| 15 Acquired Size          | 16384                     |
| 16 Spectral Size          | 32768                     |

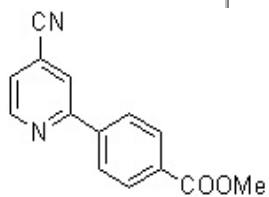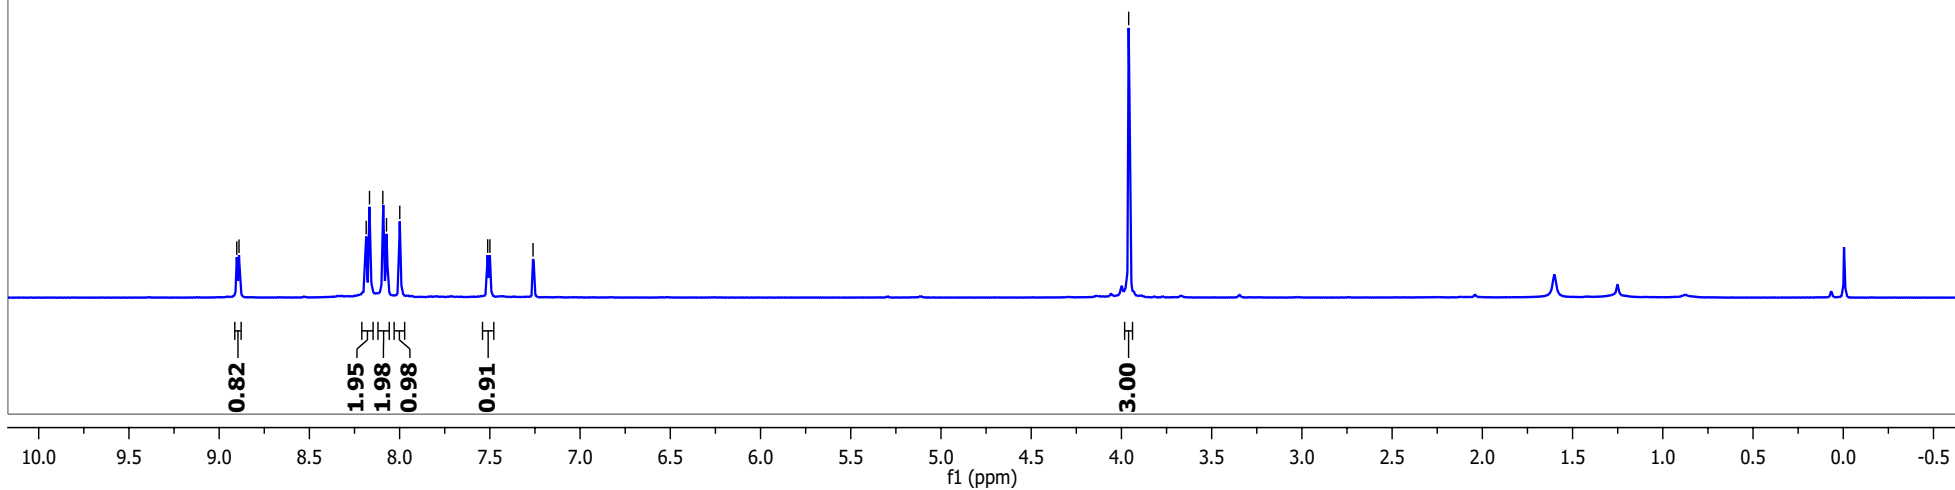

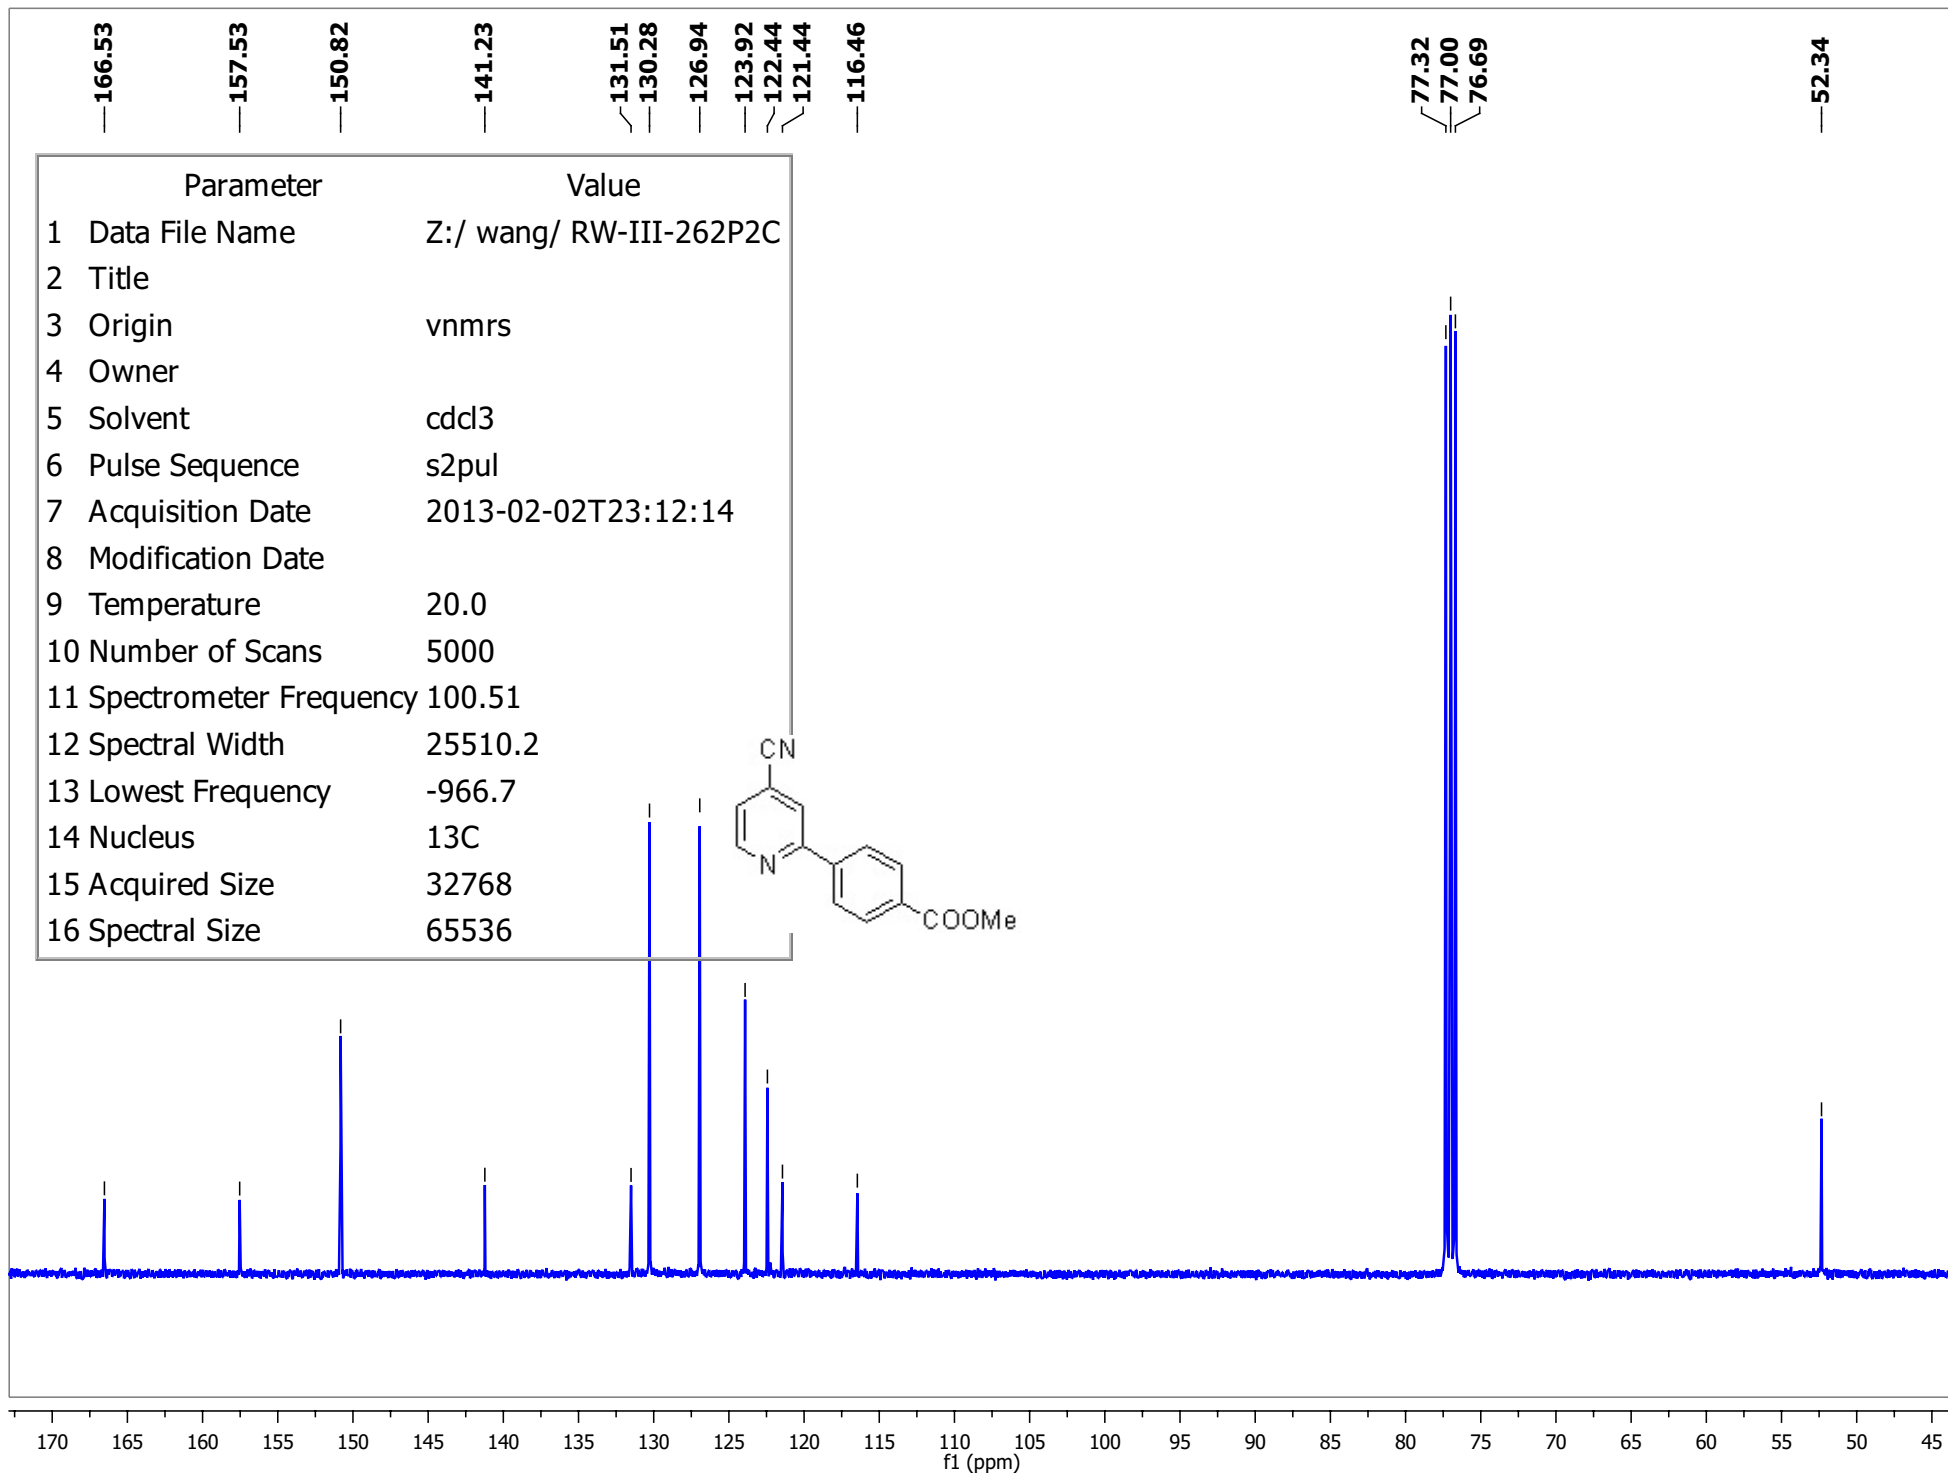

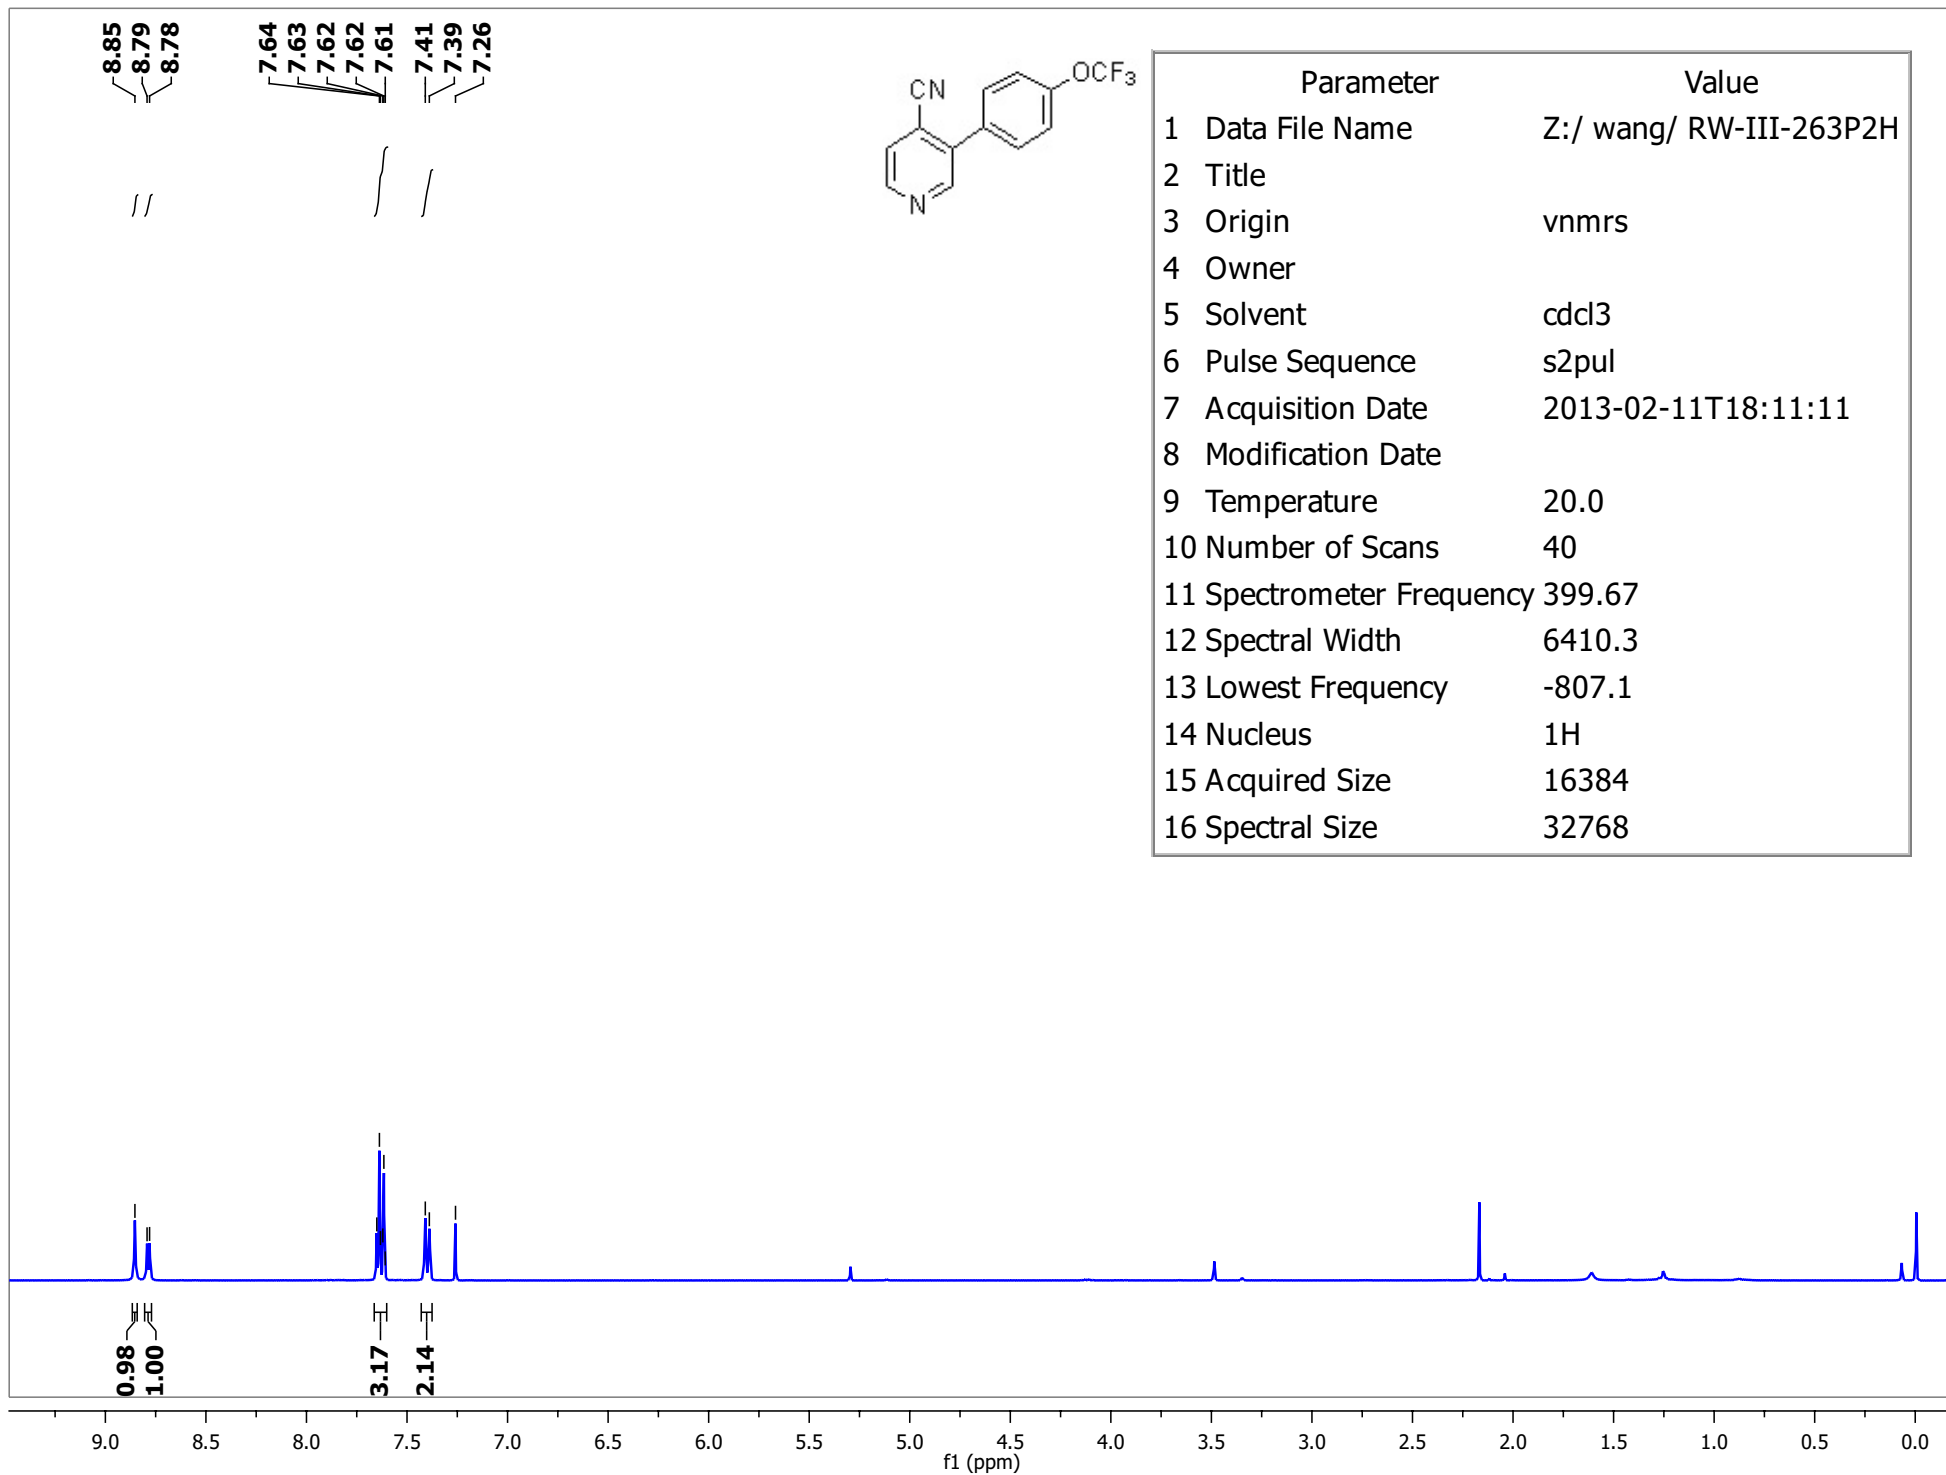

150.77  
150.22  
149.20  
137.25  
132.87  
130.39  
126.06  
124.23  
121.66  
121.46  
119.09  
118.83  
116.08  
116.01

77.43  
77.00  
76.68

| Parameter                 | Value                  |
|---------------------------|------------------------|
| 1 Data File Name          | Z:/ wang/ RW-III-263P2 |
| 2 Title                   |                        |
| 3 Origin                  | vnmrs                  |
| 4 Owner                   |                        |
| 5 Solvent                 | cdcl3                  |
| 6 Pulse Sequence          | s2pul                  |
| 7 Acquisition Date        | 2013-02-11T19:51:03    |
| 8 Modification Date       |                        |
| 9 Temperature             | 20.0                   |
| 10 Number of Scans        | 650                    |
| 11 Spectrometer Frequency | 100.51                 |
| 12 Spectral Width         | 25510.2                |
| 13 Lowest Frequency       | -966.7                 |
| 14 Nucleus                | <sup>13</sup> C        |
| 15 Acquired Size          | 32768                  |
| 16 Spectral Size          | 65536                  |

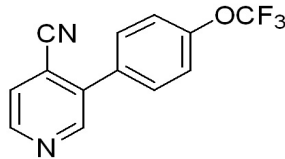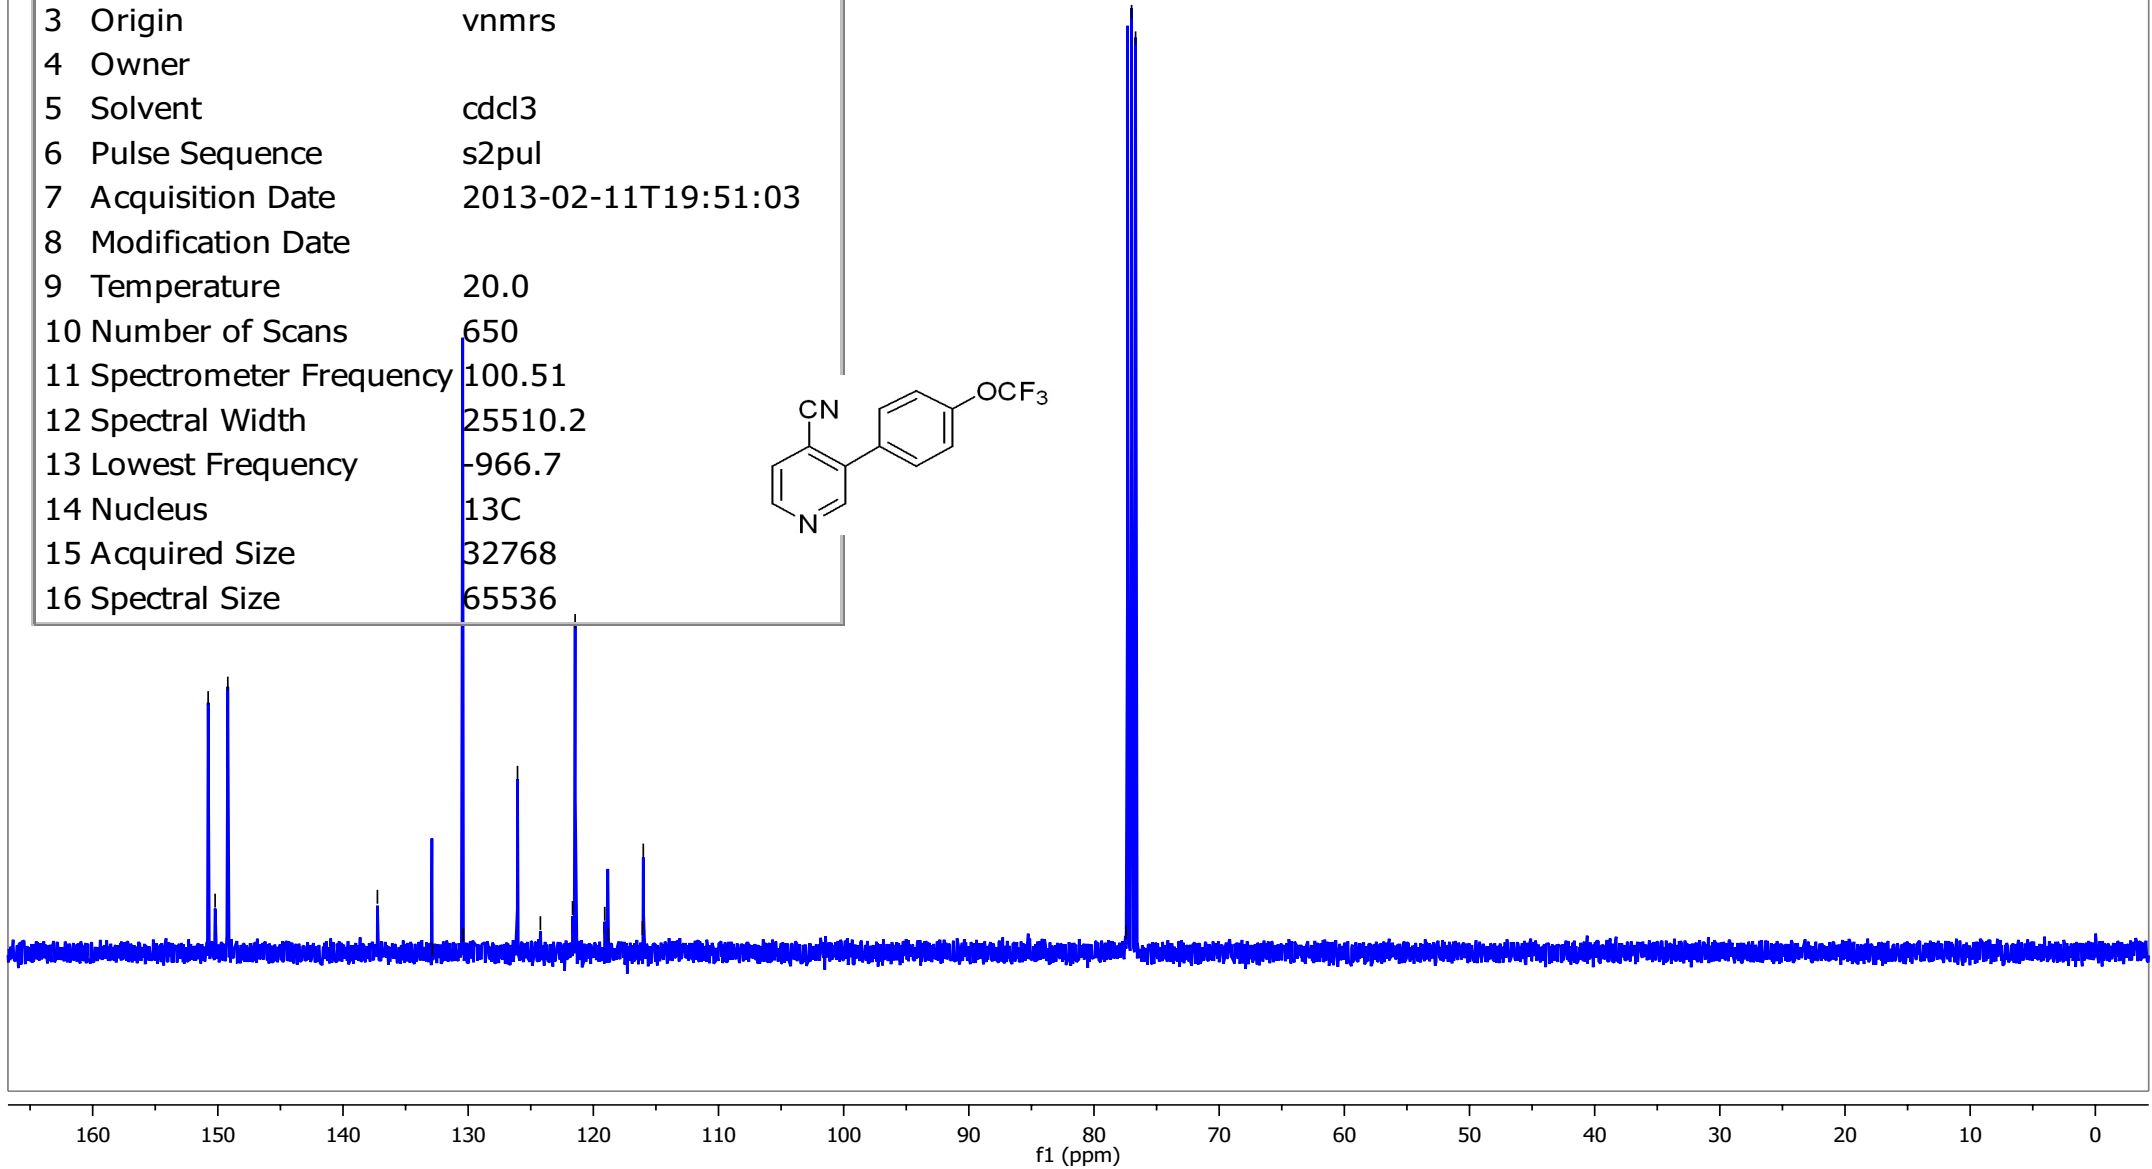

—57.81

| Parameter                 | Value                  |
|---------------------------|------------------------|
| 1 Data File Name          | Z:/ wang/ RW-III-263P2 |
| 2 Title                   |                        |
| 3 Origin                  | vnmrs                  |
| 4 Owner                   |                        |
| 5 Solvent                 | cdcl3                  |
| 6 Pulse Sequence          | s2pul                  |
| 7 Acquisition Date        | 2013-02-11T19:51:03    |
| 8 Modification Date       |                        |
| 9 Temperature             | 20.0                   |
| 10 Number of Scans        | 650                    |
| 11 Spectrometer Frequency | 100.51                 |
| 12 Spectral Width         | 25510.2                |
| 13 Lowest Frequency       | -966.7                 |
| 14 Nucleus                | <sup>13</sup> C        |
| 15 Acquired Size          | 32768                  |
| 16 Spectral Size          | 65536                  |

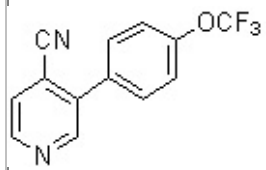

30 20 10 0 -10 -20 -30 -40 -50 -60 -70 -80 -90 -100 -120 -140 -160 -180 -200 -220 -240 -260 -280  
f1 (ppm)

8.87  
8.87  
8.85  
8.85  
7.99  
7.95  
7.95  
7.94  
7.90  
7.46  
7.44  
7.26

| Parameter                 | Value                  |
|---------------------------|------------------------|
| 1 Data File Name          | Z:\wang\ RW-III-270P1H |
| 2 Title                   |                        |
| 3 Origin                  | vnmrs                  |
| 4 Owner                   |                        |
| 5 Solvent                 | cdcl3                  |
| 6 Pulse Sequence          | s2pul                  |
| 7 Acquisition Date        | 2013-02-12T15:13:56    |
| 8 Modification Date       |                        |
| 9 Temperature             | 20.0                   |
| 10 Number of Scans        | 33                     |
| 11 Spectrometer Frequency | 399.67                 |
| 12 Spectral Width         | 6410.3                 |
| 13 Lowest Frequency       | -807.1                 |
| 14 Nucleus                | 1H                     |
| 15 Acquired Size          | 16384                  |
| 16 Spectral Size          | 32768                  |

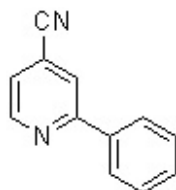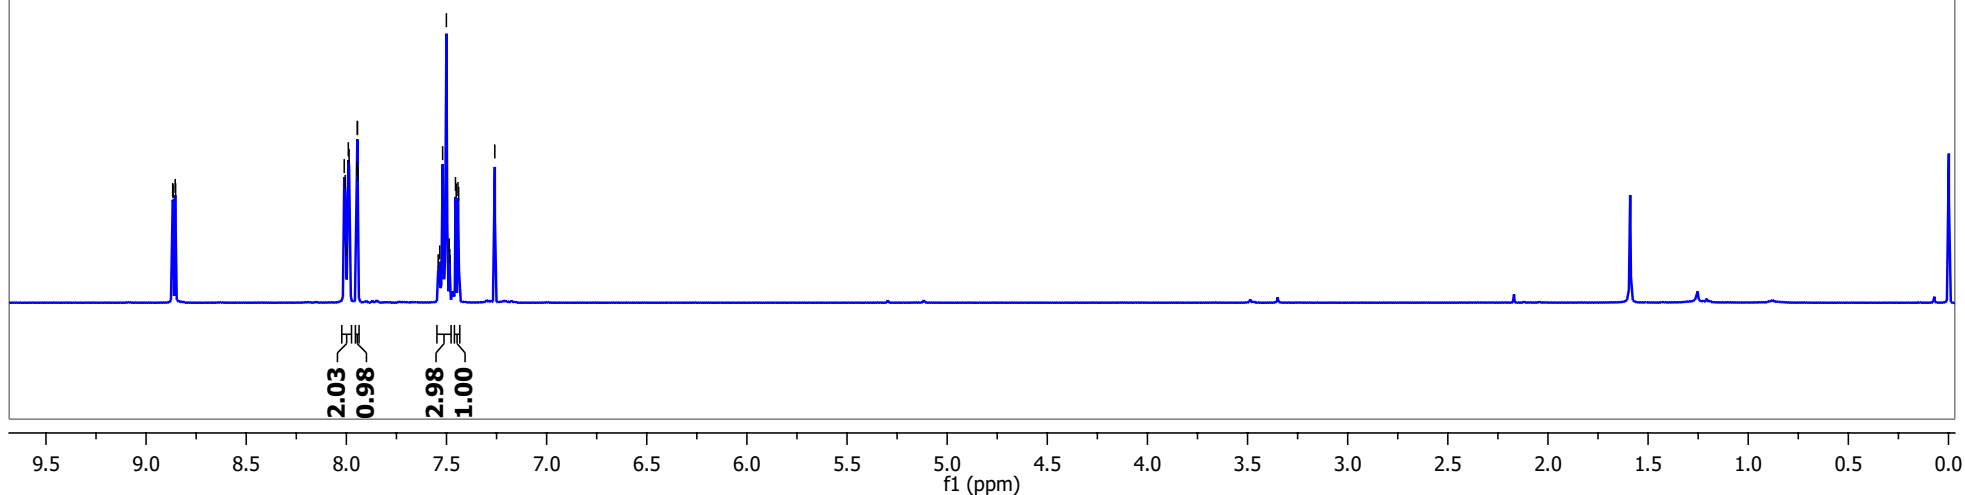

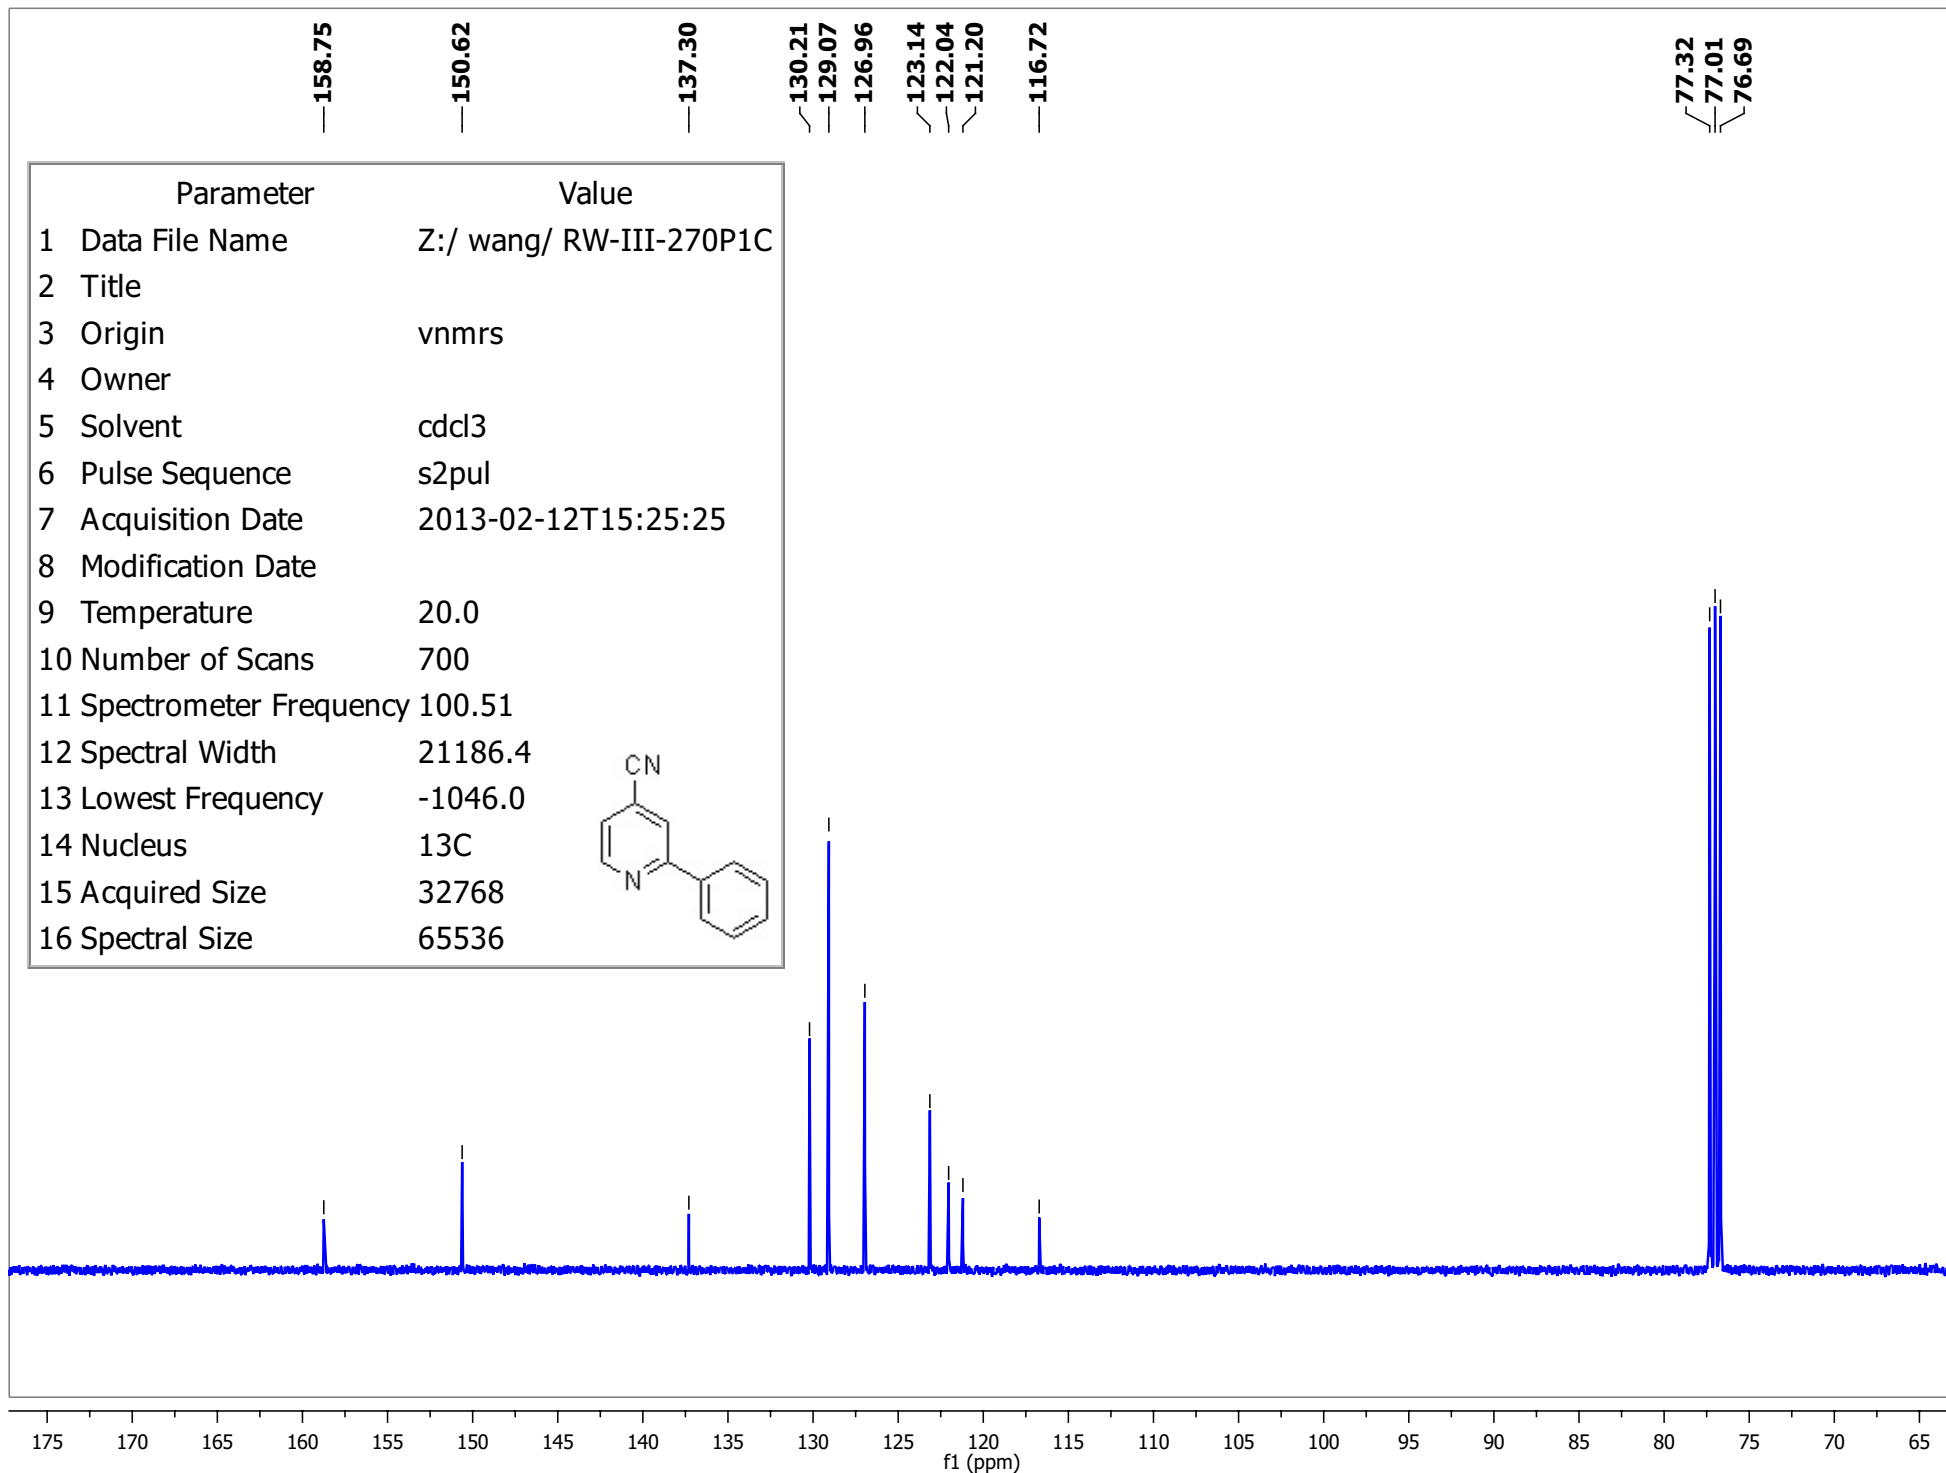

| Parameter                 | Value                   |
|---------------------------|-------------------------|
| 1 Data File Name          | Z:/ wang/ RW-III-270P1C |
| 2 Title                   |                         |
| 3 Origin                  | vnms                    |
| 4 Owner                   |                         |
| 5 Solvent                 | cdcl3                   |
| 6 Pulse Sequence          | s2pul                   |
| 7 Acquisition Date        | 2013-02-12T15:25:25     |
| 8 Modification Date       |                         |
| 9 Temperature             | 20.0                    |
| 10 Number of Scans        | 700                     |
| 11 Spectrometer Frequency | 100.51                  |
| 12 Spectral Width         | 21186.4                 |
| 13 Lowest Frequency       | -1046.0                 |
| 14 Nucleus                | 13C                     |
| 15 Acquired Size          | 32768                   |
| 16 Spectral Size          | 65536                   |

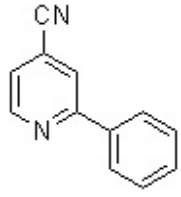

8.87  
8.76  
8.75  
7.64  
7.63  
7.62  
7.62  
7.60  
7.60  
7.59  
7.59  
7.58  
7.58  
7.57  
7.57  
7.55  
7.54  
7.53  
7.53  
7.52  
7.51

| Parameter                 | Value                   |
|---------------------------|-------------------------|
| 1 Data File Name          | Z:/ wang/ RW-III-270P2H |
| 2 Title                   |                         |
| 3 Origin                  | vnmrs                   |
| 4 Owner                   |                         |
| 5 Solvent                 | cdcl3                   |
| 6 Pulse Sequence          | s2pul                   |
| 7 Acquisition Date        | 2013-02-12T15:19:33     |
| 8 Modification Date       |                         |
| 9 Temperature             | 20.0                    |
| 10 Number of Scans        | 33                      |
| 11 Spectrometer Frequency | 399.67                  |
| 12 Spectral Width         | 6410.3                  |
| 13 Lowest Frequency       | -807.1                  |
| 14 Nucleus                | 1H                      |
| 15 Acquired Size          | 16384                   |
| 16 Spectral Size          | 32768                   |

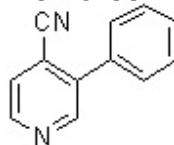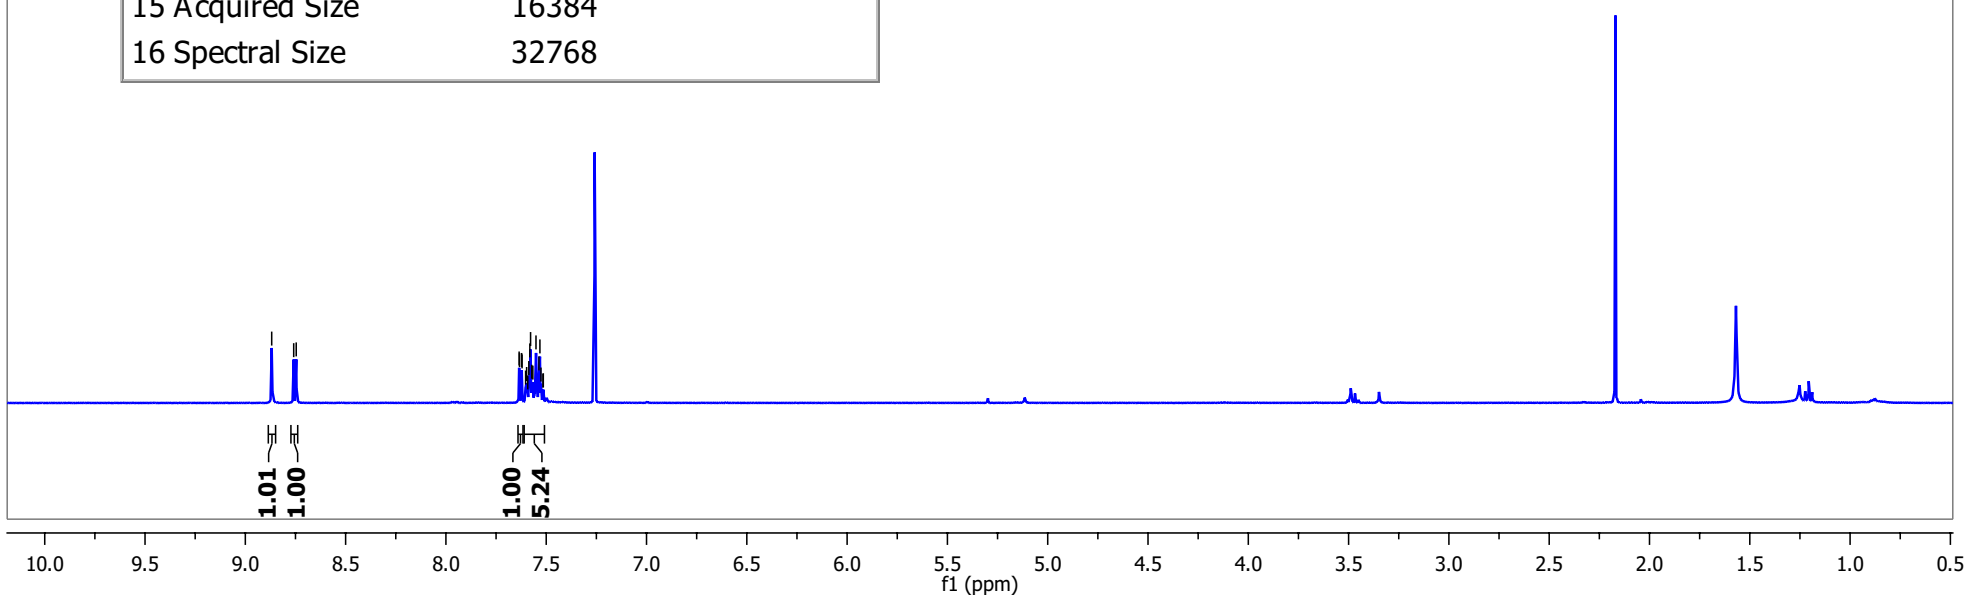



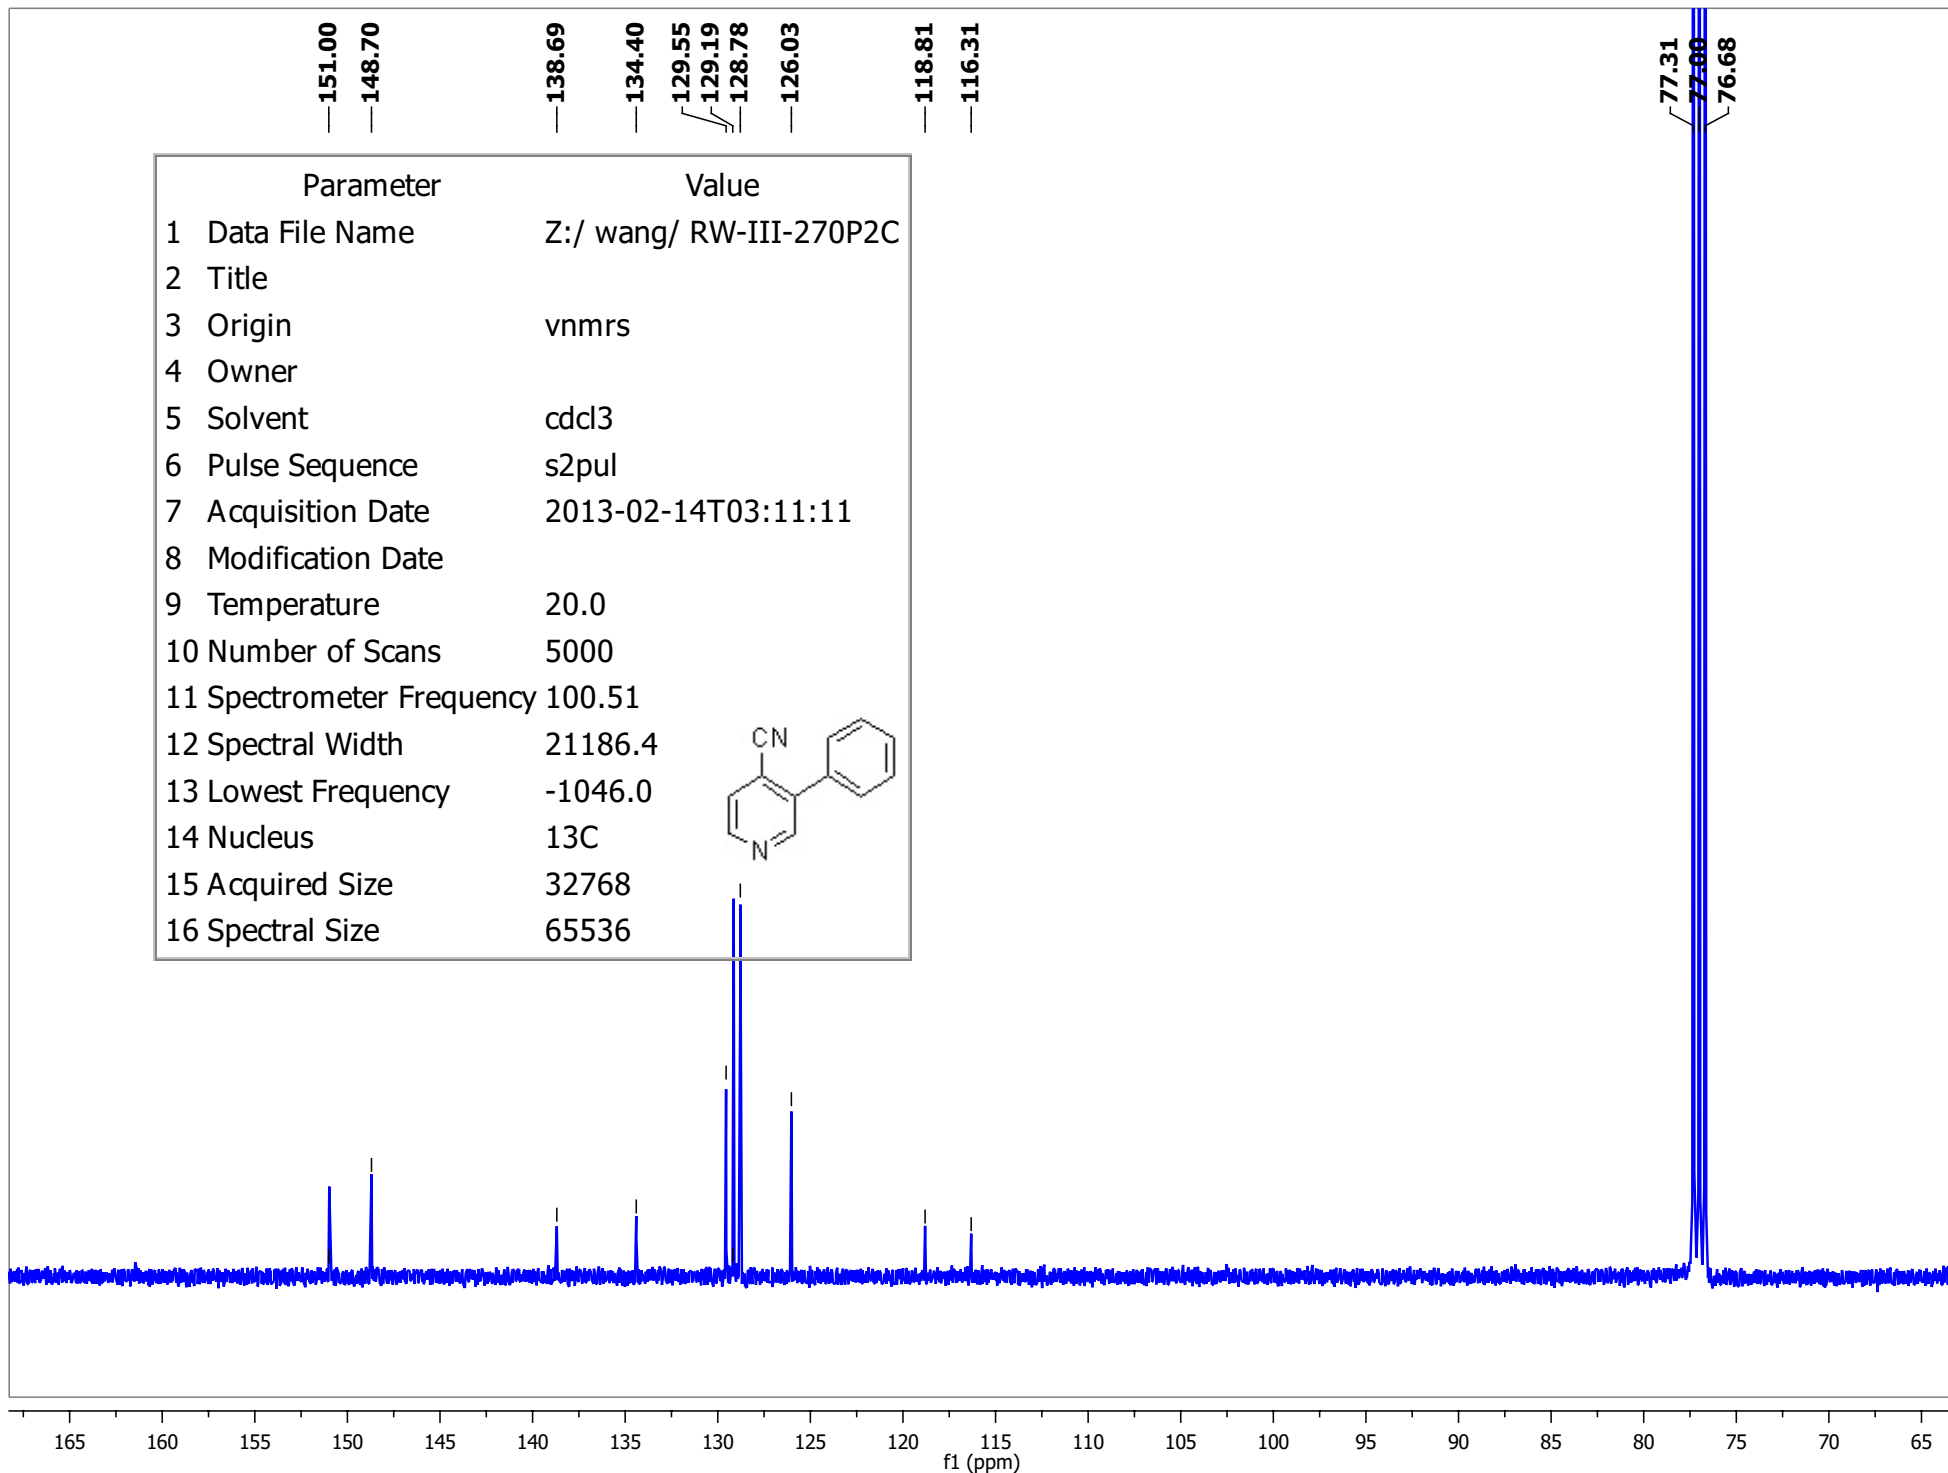

\_pslabel\_01

8.91  
8.89  
8.31  
8.19  
8.17  
7.99  
7.76  
7.74  
7.67  
7.65  
7.63  
7.52  
7.51  
7.26  
7.26

-0.00

| Parameter                 | Value                                                   |
|---------------------------|---------------------------------------------------------|
| 1 Data File Name          | X:/ wang/ RW-III-283P1_20130220_01/_pslabel_01.fid/ fid |
| 2 Title                   | _pslabel_01                                             |
| 3 Comment                 |                                                         |
| 4 Origin                  | Varian                                                  |
| 5 Spectrometer            | vnmrs                                                   |
| 6 Solvent                 | cdcl3                                                   |
| 7 Temperature             | 20.0                                                    |
| 8 Pulse Sequence          | s2pul                                                   |
| 9 Experiment              | 1D                                                      |
| 10 Relaxation Delay       | 1.0000                                                  |
| 11 Acquisition Time       | 2.5559                                                  |
| 12 Acquisition Date       | 2013-02-20T18:35:02                                     |
| 13 Spectrometer Frequency | 399.67                                                  |
| 14 Nucleus                | 1H                                                      |

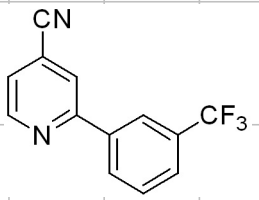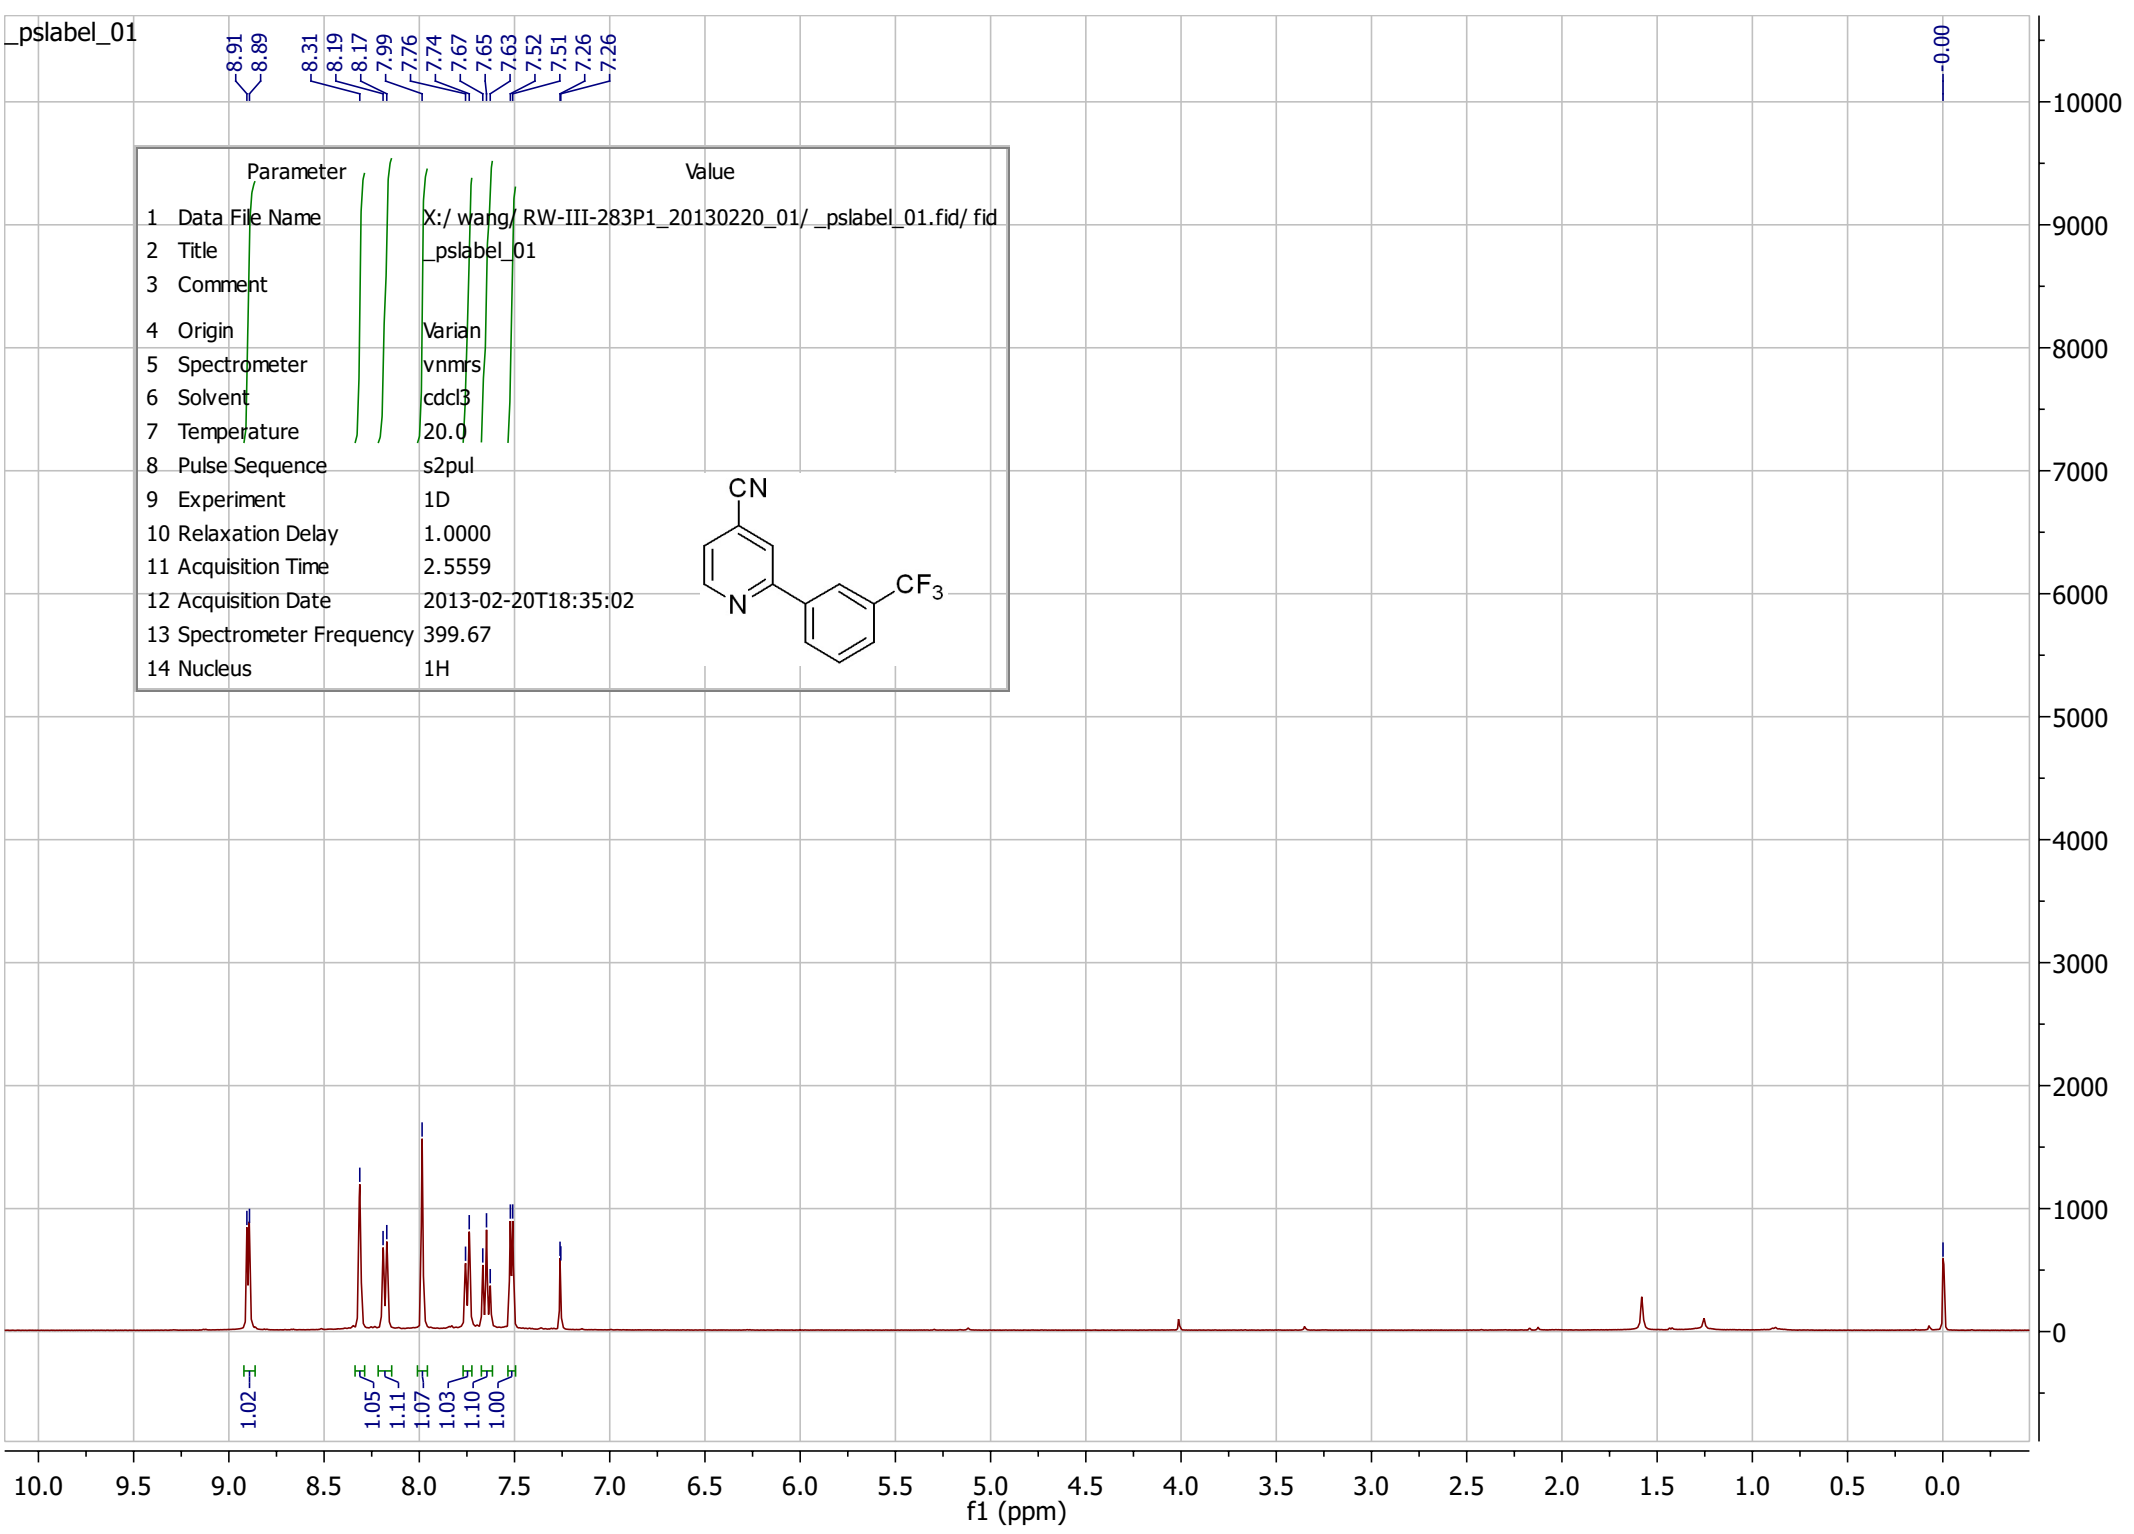

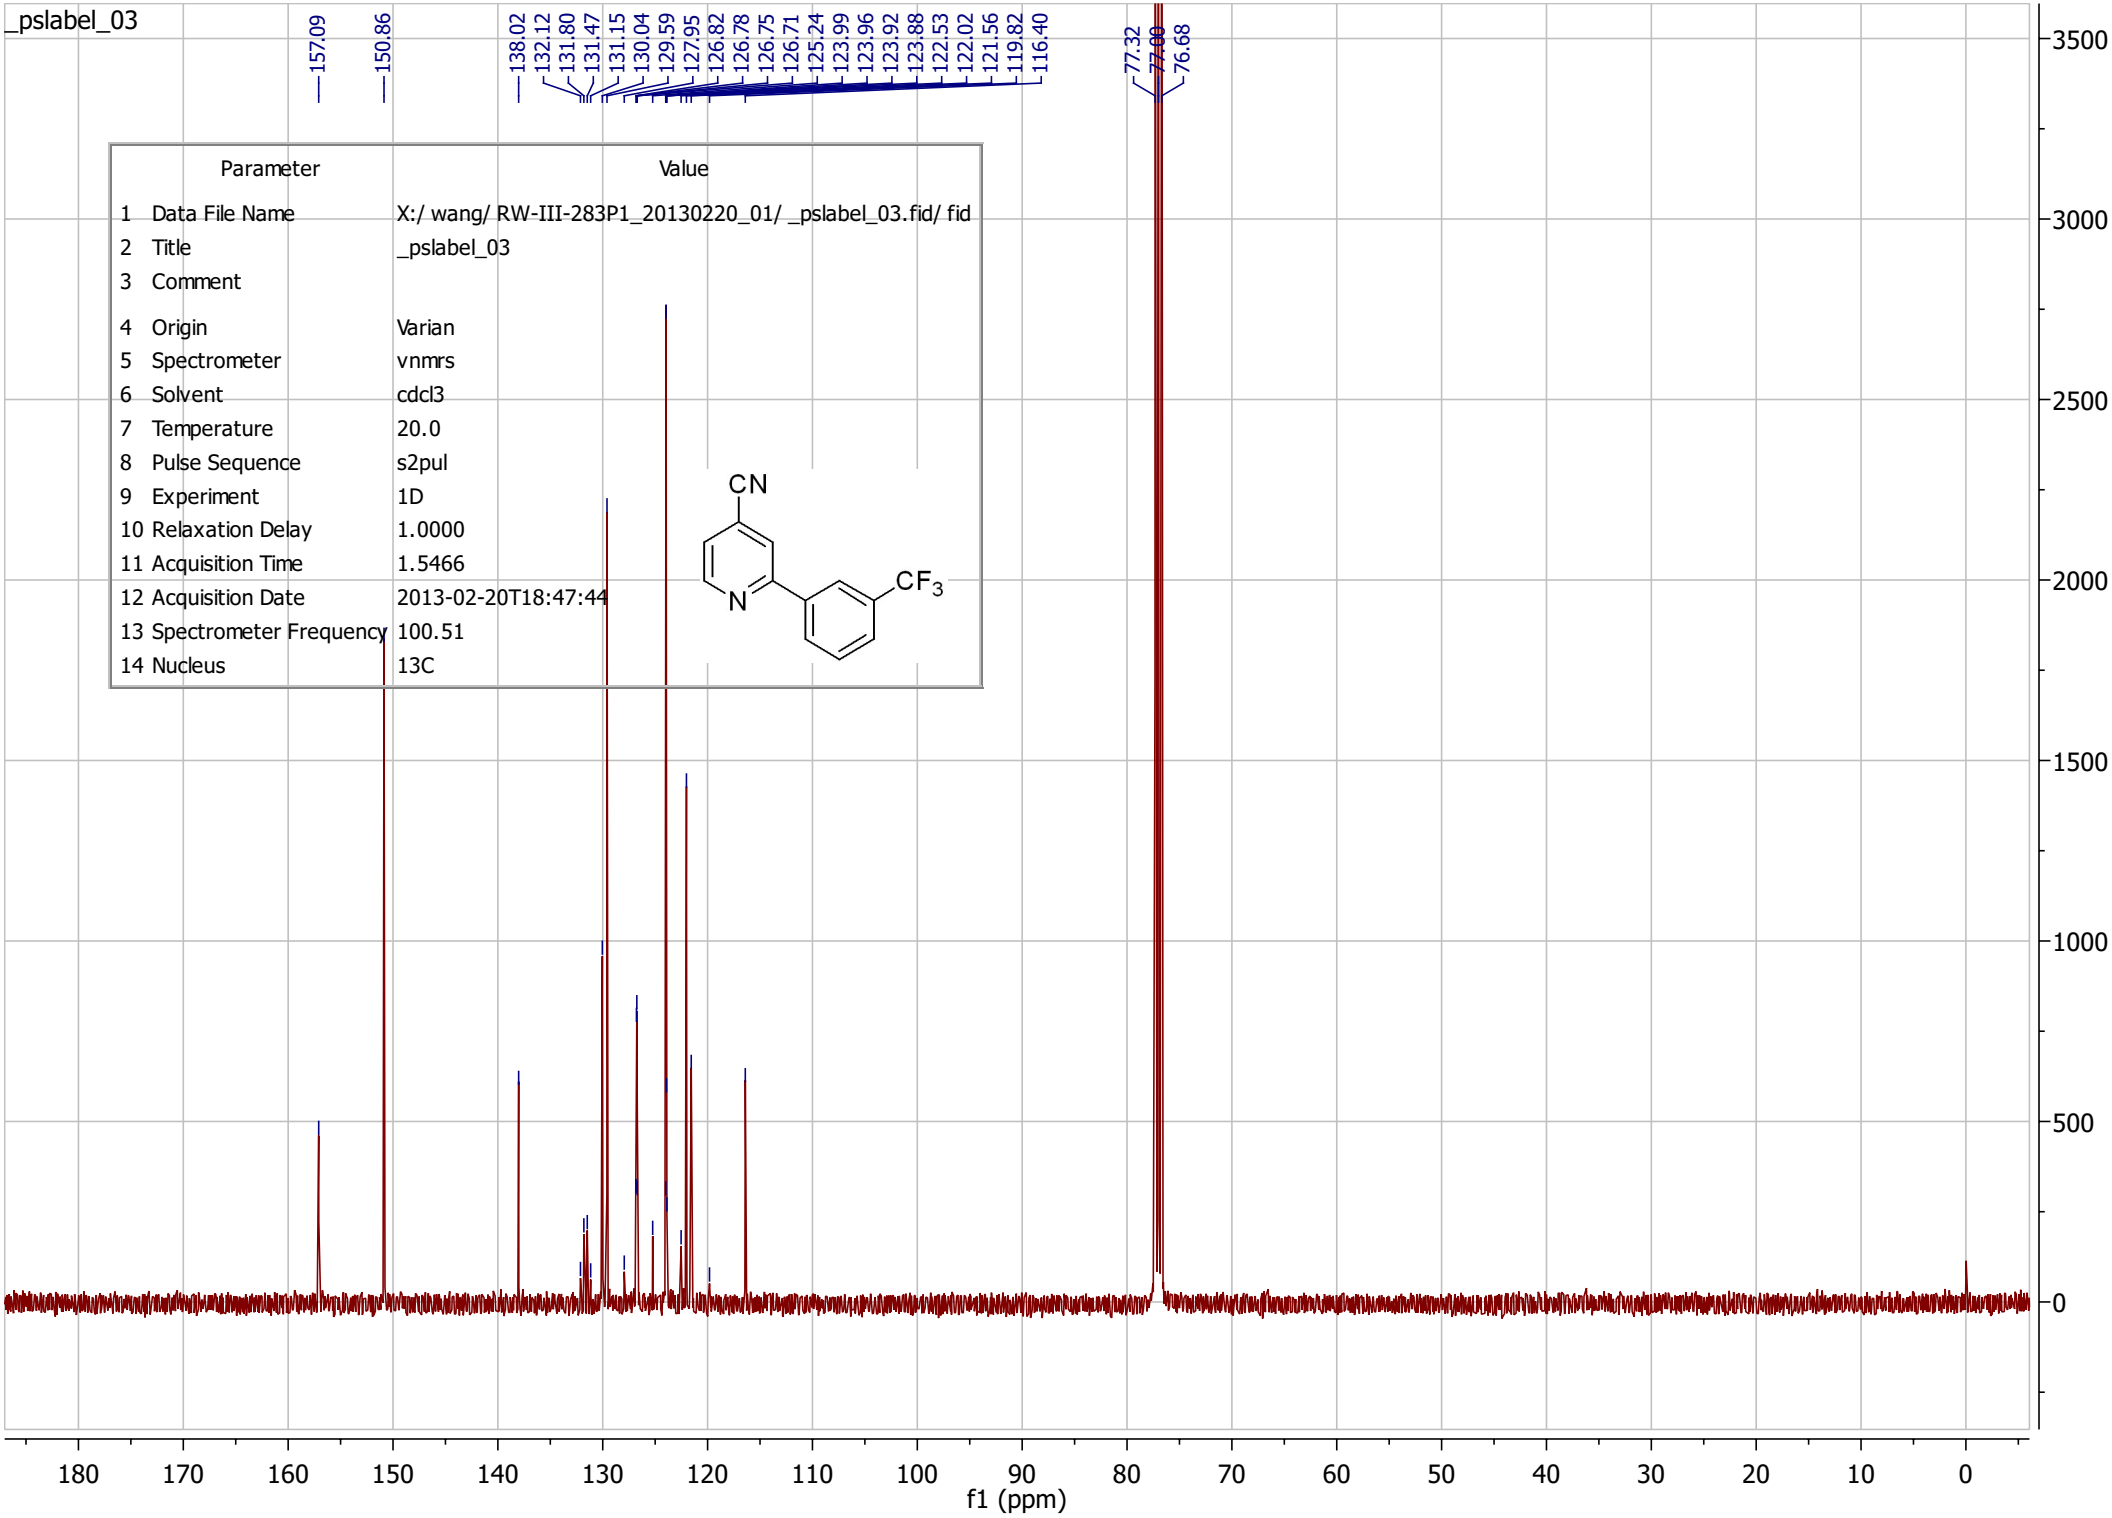

\_pslabel\_02

| Parameter                 | Value                                                    |
|---------------------------|----------------------------------------------------------|
| 1 Data File Name          | X:/ wang/ RW-III-283P1_20130220_01/ _pslabel_02.fid/ fid |
| 2 Title                   | _pslabel_02                                              |
| 3 Comment                 |                                                          |
| 4 Origin                  | Varian                                                   |
| 5 Spectrometer            | vnmrs                                                    |
| 6 Solvent                 | cdc3                                                     |
| 7 Temperature             | 20.0                                                     |
| 8 Pulse Sequence          | s2pul                                                    |
| 9 Experiment              | 1D                                                       |
| 10 Relaxation Delay       | 1.0000                                                   |
| 11 Acquisition Time       | 0.7340                                                   |
| 12 Acquisition Date       | 2013-02-20T18:39:37                                      |
| 13 Spectrometer Frequency | 376.03                                                   |
| 14 Nucleus                | 19F                                                      |

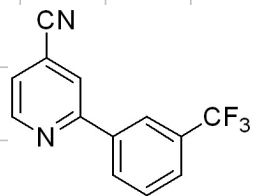

62.75

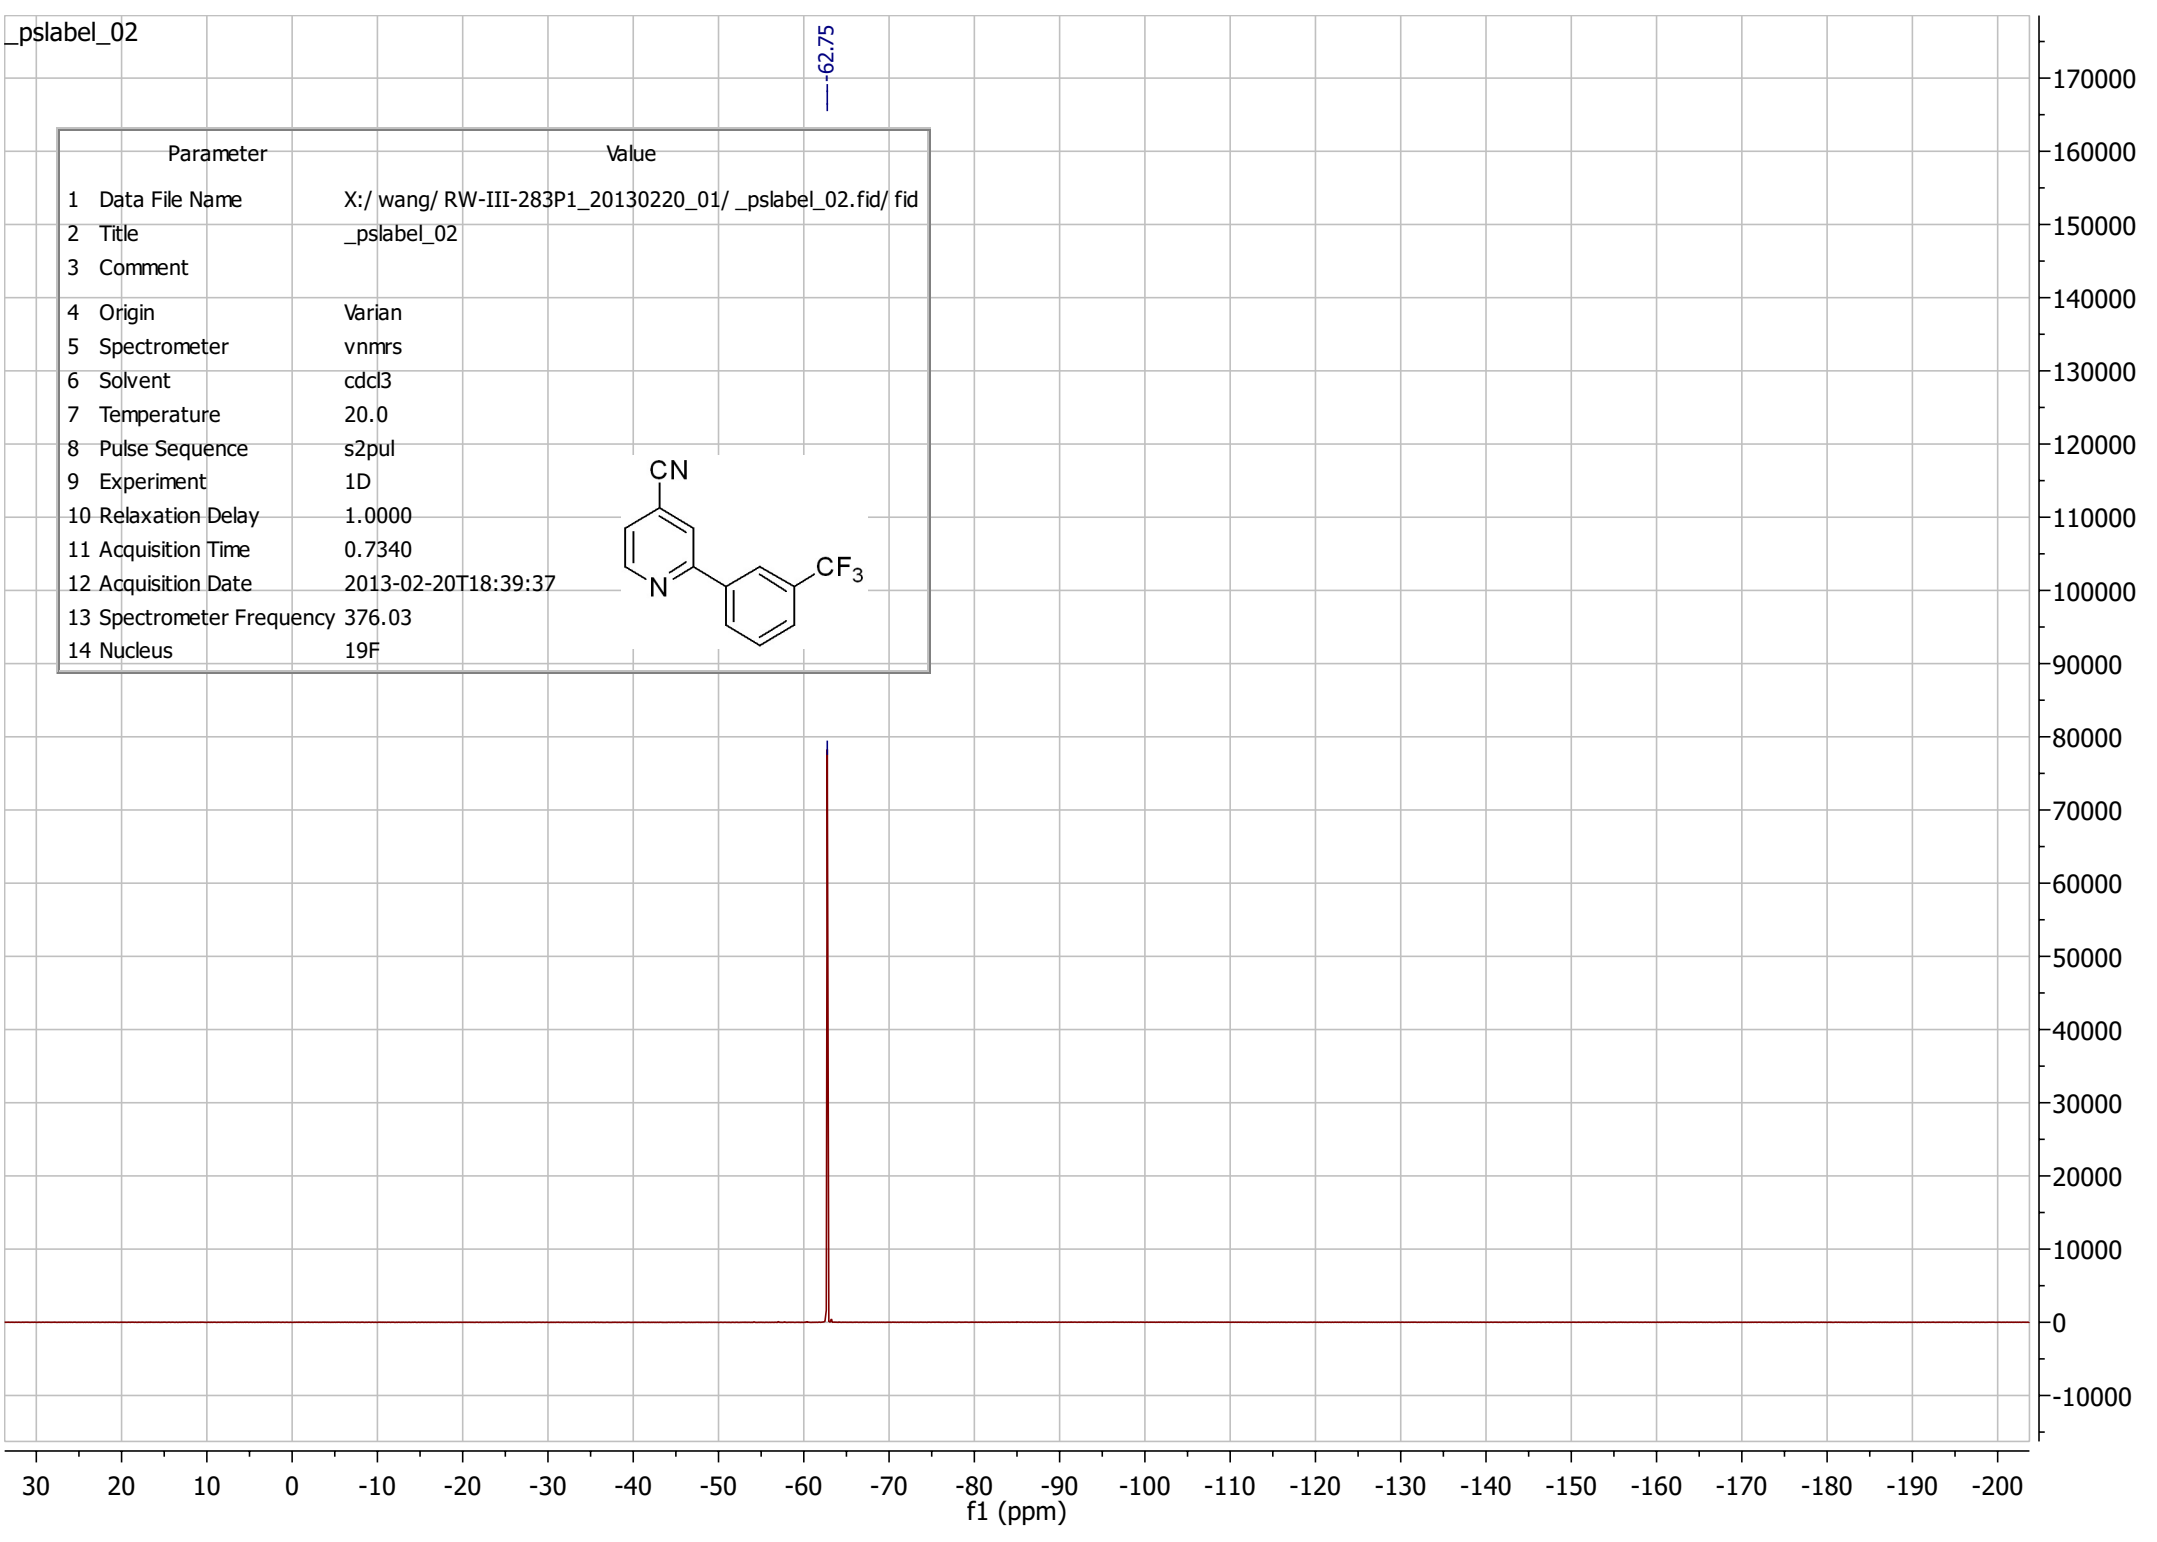

\_pslabel\_01

8.88  
8.83  
8.82

7.82  
7.81  
7.79  
7.72  
7.70  
7.68  
7.66  
7.26

0.00

| Parameter                 | Value                                                    |
|---------------------------|----------------------------------------------------------|
| 1 Data File Name          | X:/ wang/ RW-III-283P2H_20130221_01/_pslabel_01.fid/ fid |
| 2 Title                   | _pslabel_01                                              |
| 3 Comment                 |                                                          |
| 4 Origin                  | Varian                                                   |
| 5 Spectrometer            | vnmr5                                                    |
| 6 Solvent                 | cdcl3                                                    |
| 7 Temperature             | 20.0                                                     |
| 8 Pulse Sequence          | s2pul                                                    |
| 9 Experiment              | 1D                                                       |
| 10 Relaxation Delay       | 1.0000                                                   |
| 11 Acquisition Time       | 2.5559                                                   |
| 12 Acquisition Date       | 2013-02-21T08:54:42                                      |
| 13 Spectrometer Frequency | 399.67                                                   |
| 14 Nucleus                | 1H                                                       |

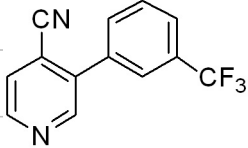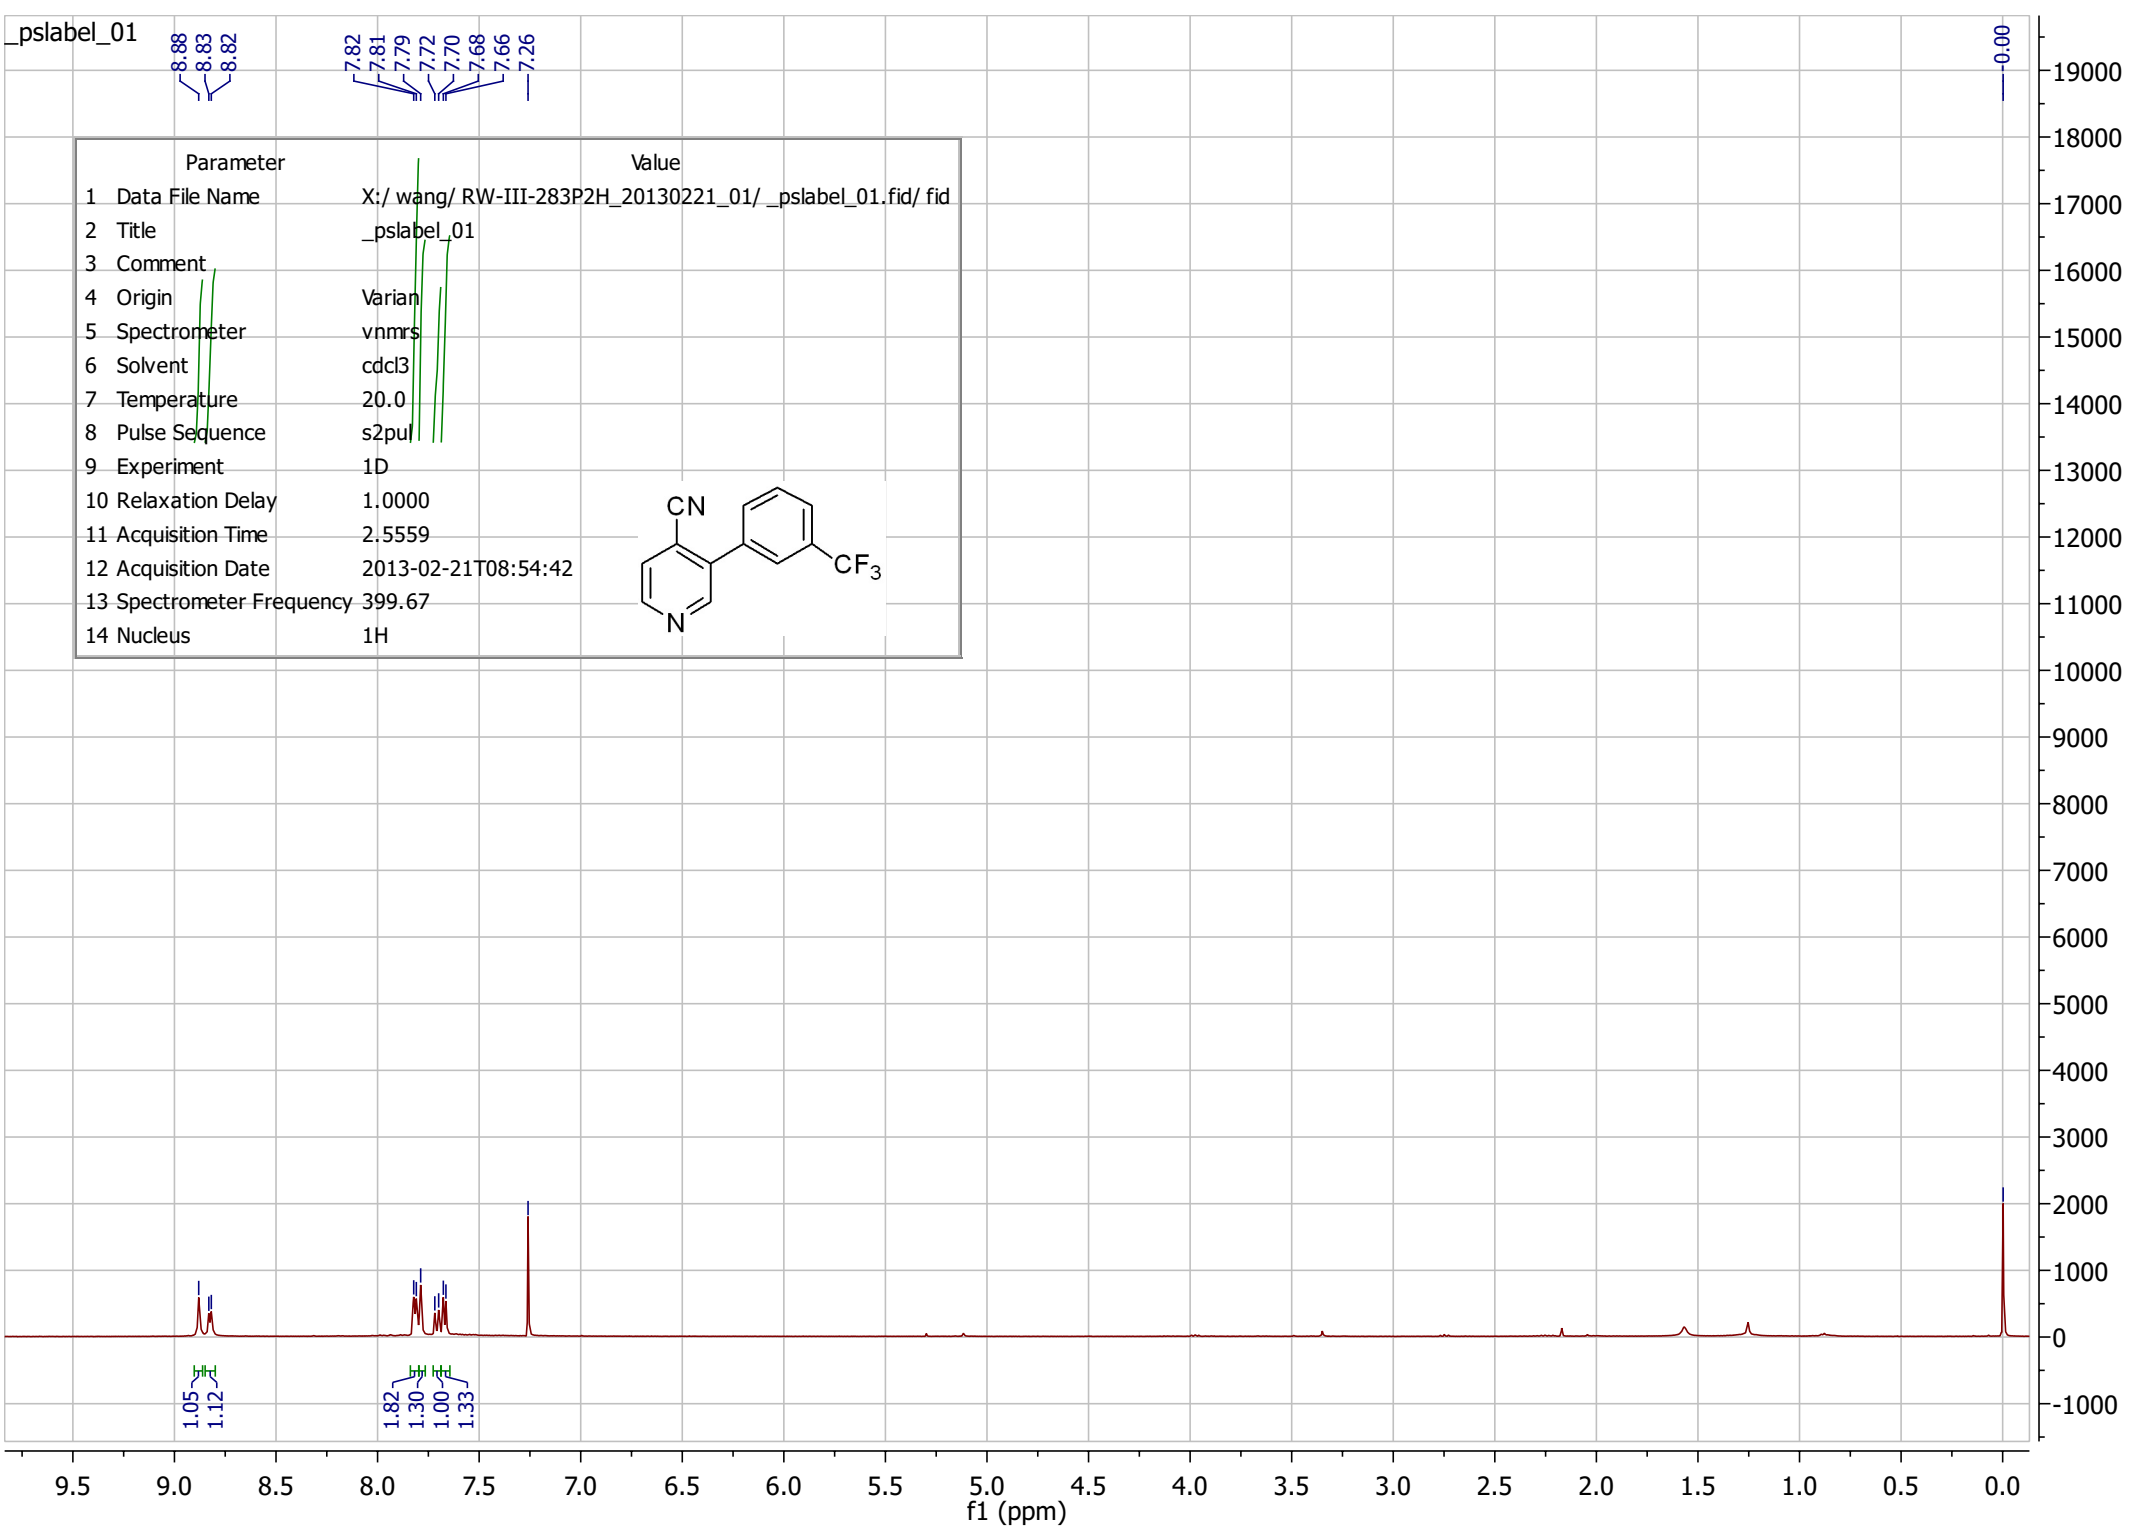

150.75  
149.59  
135.17  
132.22  
132.19  
131.90  
131.57  
131.25  
130.42  
129.71  
129.64  
127.71  
126.40  
126.36  
126.33  
126.29  
126.07  
125.71  
125.67  
125.63  
125.60  
125.00  
122.29  
119.09  
115.80

77.31  
76.99  
76.68

—0.12

| Parameter                 | Value                   |
|---------------------------|-------------------------|
| 1 Data File Name          | Z:/ wang/ RW-III-283P2C |
| 2 Title                   |                         |
| 3 Origin                  | vnmrs                   |
| 4 Owner                   |                         |
| 5 Solvent                 | cdcl3                   |
| 6 Pulse Sequence          | s2pul                   |
| 7 Acquisition Date        | 2013-03-08T00:04:10     |
| 8 Modification Date       |                         |
| 9 Temperature             | 20.0                    |
| 10 Number of Scans        | 10000                   |
| 11 Spectrometer Frequency | 100.51                  |
| 12 Spectral Width         | 21186.4                 |
| 13 Lowest Frequency       | -1046.0                 |
| 14 Nucleus                | 13C                     |
| 15 Acquired Size          | 32768                   |
| 16 Spectral Size          | 65536                   |

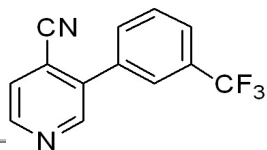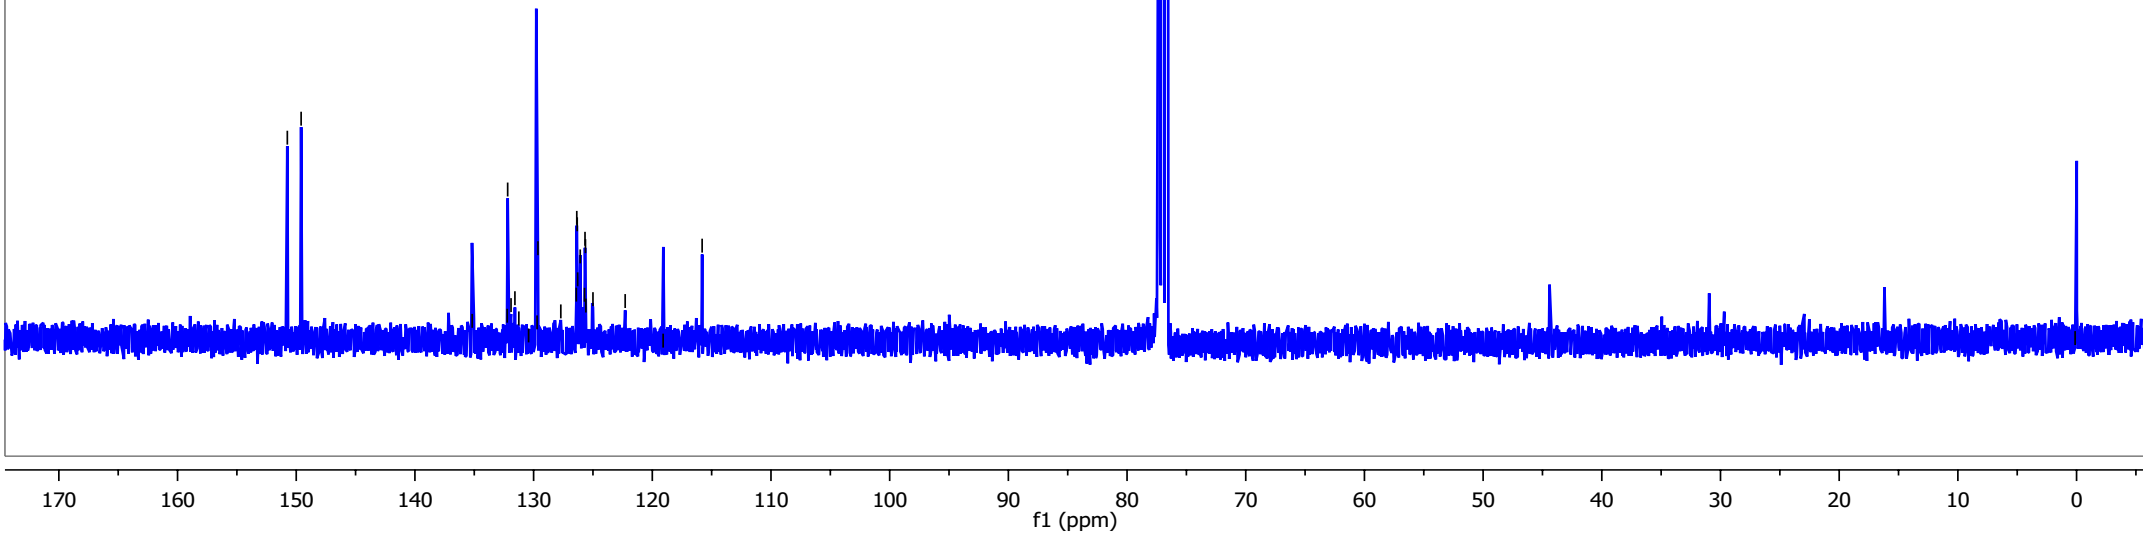

| Parameter                 | Value                                    |
|---------------------------|------------------------------------------|
| 1 Data File Name          | C:/Users/Falck_JRC/Desktop/RW-III-283P2F |
| 2 Title                   | _pslabel_02                              |
| 3 Comment                 |                                          |
| 4 Origin                  | Varian                                   |
| 5 Spectrometer            | vnmrs                                    |
| 6 Solvent                 | cdcl3                                    |
| 7 Temperature             | 20.0                                     |
| 8 Pulse Sequence          | s2pul                                    |
| 9 Experiment              | 1D                                       |
| 10 Relaxation Delay       | 1.0000                                   |
| 11 Acquisition Time       | 0.7340                                   |
| 12 Acquisition Date       | 2013-03-07T14:34:06                      |
| 13 Spectrometer Frequency | 376.03                                   |
| 14 Nucleus                | 19F                                      |

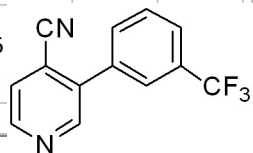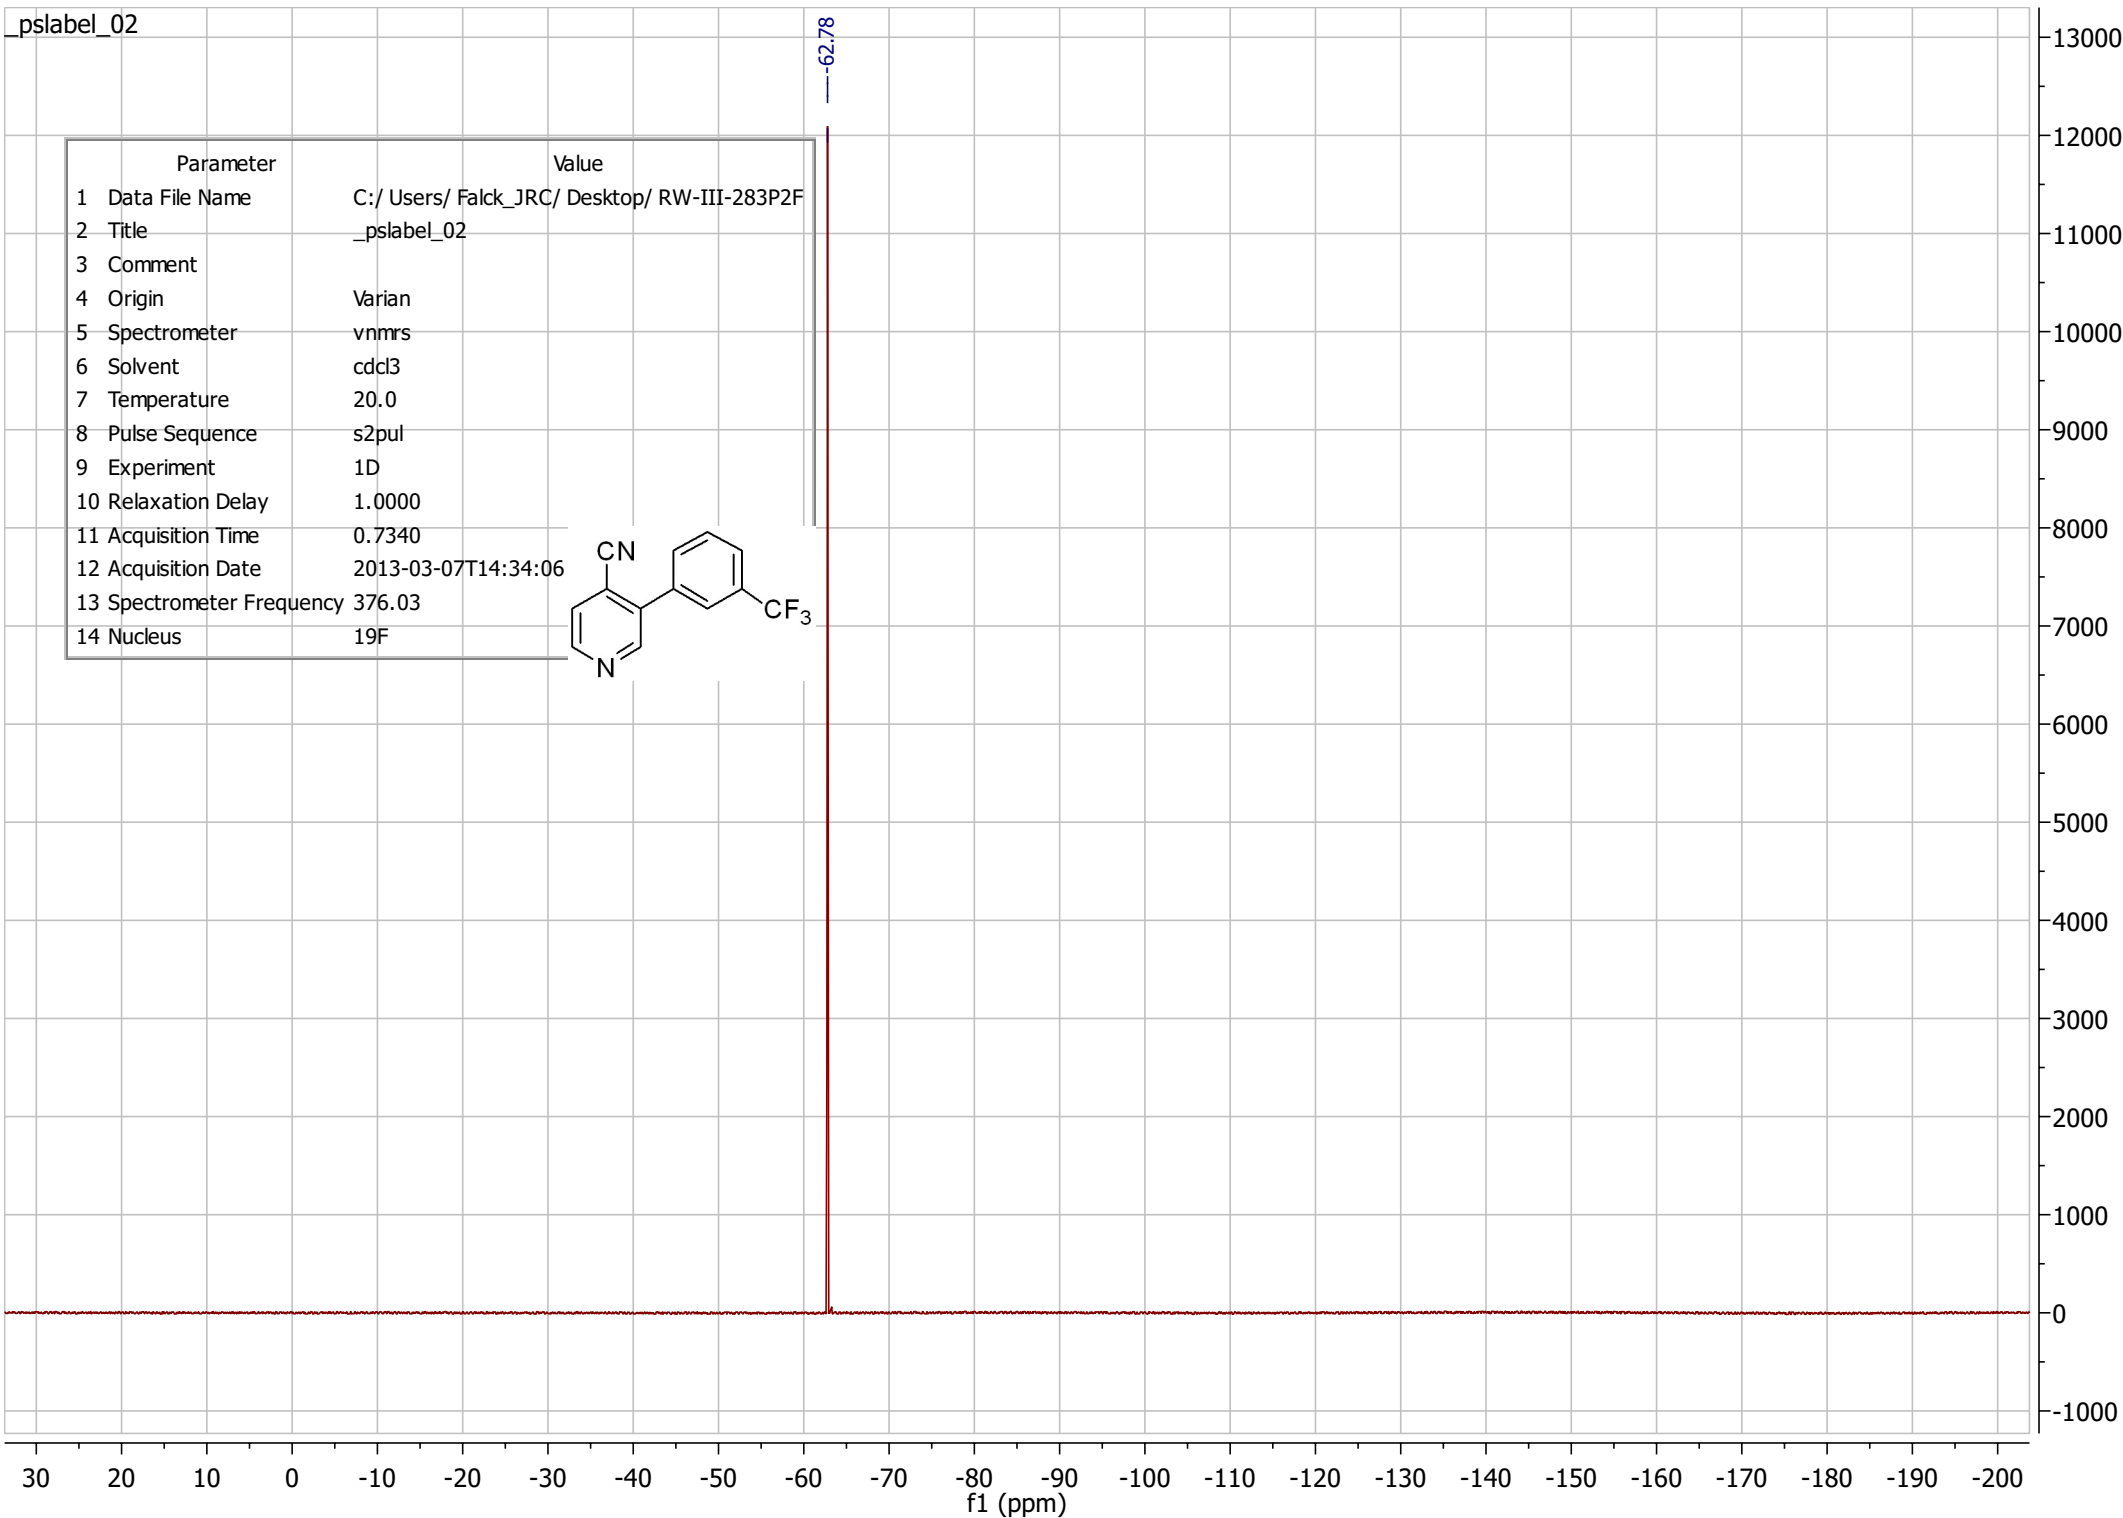

8.85  
8.85  
8.84  
8.83  
8.25  
8.24  
8.24  
8.24  
7.87  
7.83  
7.54  
7.49  
7.24  
7.22  
7.22  
7.21  
7.21  
7.20  
7.20  
7.19  
7.19

4.86

3.30

| Parameter                 | Value                  |
|---------------------------|------------------------|
| 1 Data File Name          | Z:/ wang/ RW-III-274P1 |
| 2 Title                   |                        |
| 3 Origin                  | vnMrs                  |
| 4 Owner                   |                        |
| 5 Solvent                 | cd3od                  |
| 6 Pulse Sequence          | s2pul                  |
| 7 Acquisition Date        | 2013-02-13T16:08:09    |
| 8 Modification Date       |                        |
| 9 Temperature             | 20.0                   |
| 10 Number of Scans        | 33                     |
| 11 Spectrometer Frequency | 399.67                 |
| 12 Spectral Width         | 6410.3                 |
| 13 Lowest Frequency       | -807.1                 |
| 14 Nucleus                | 1H                     |
| 15 Acquired Size          | 16384                  |
| 16 Spectral Size          | 32768                  |

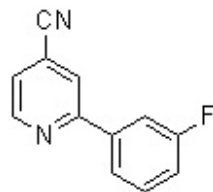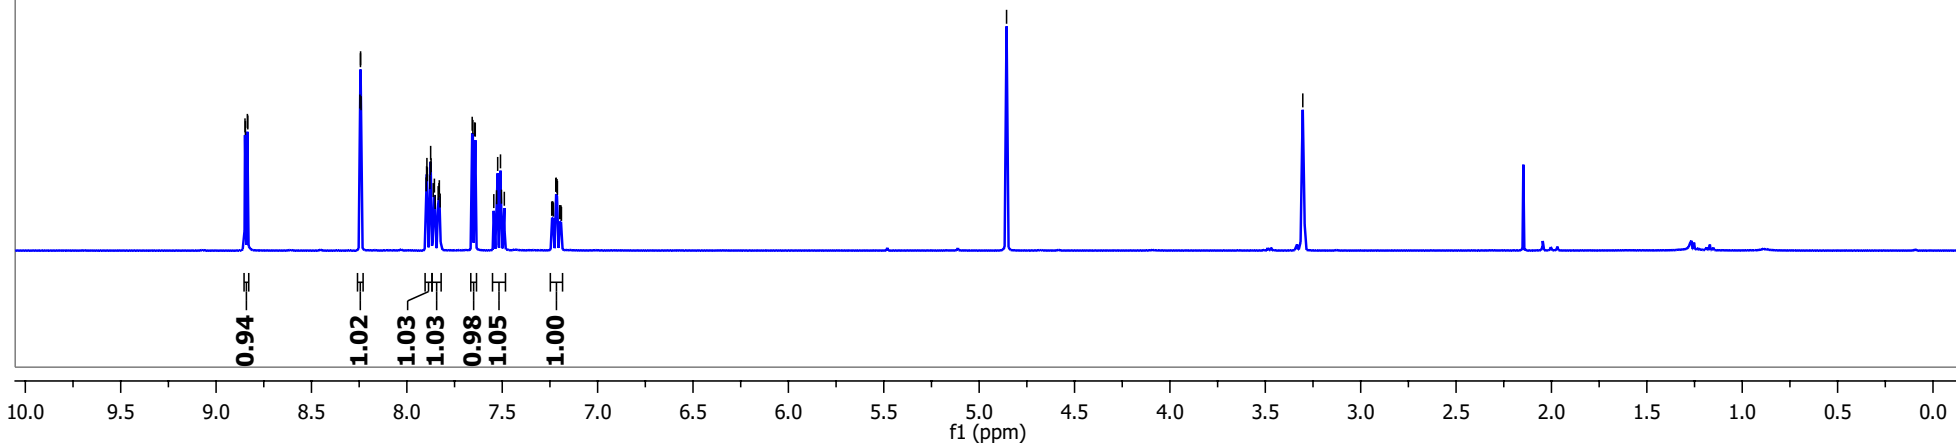



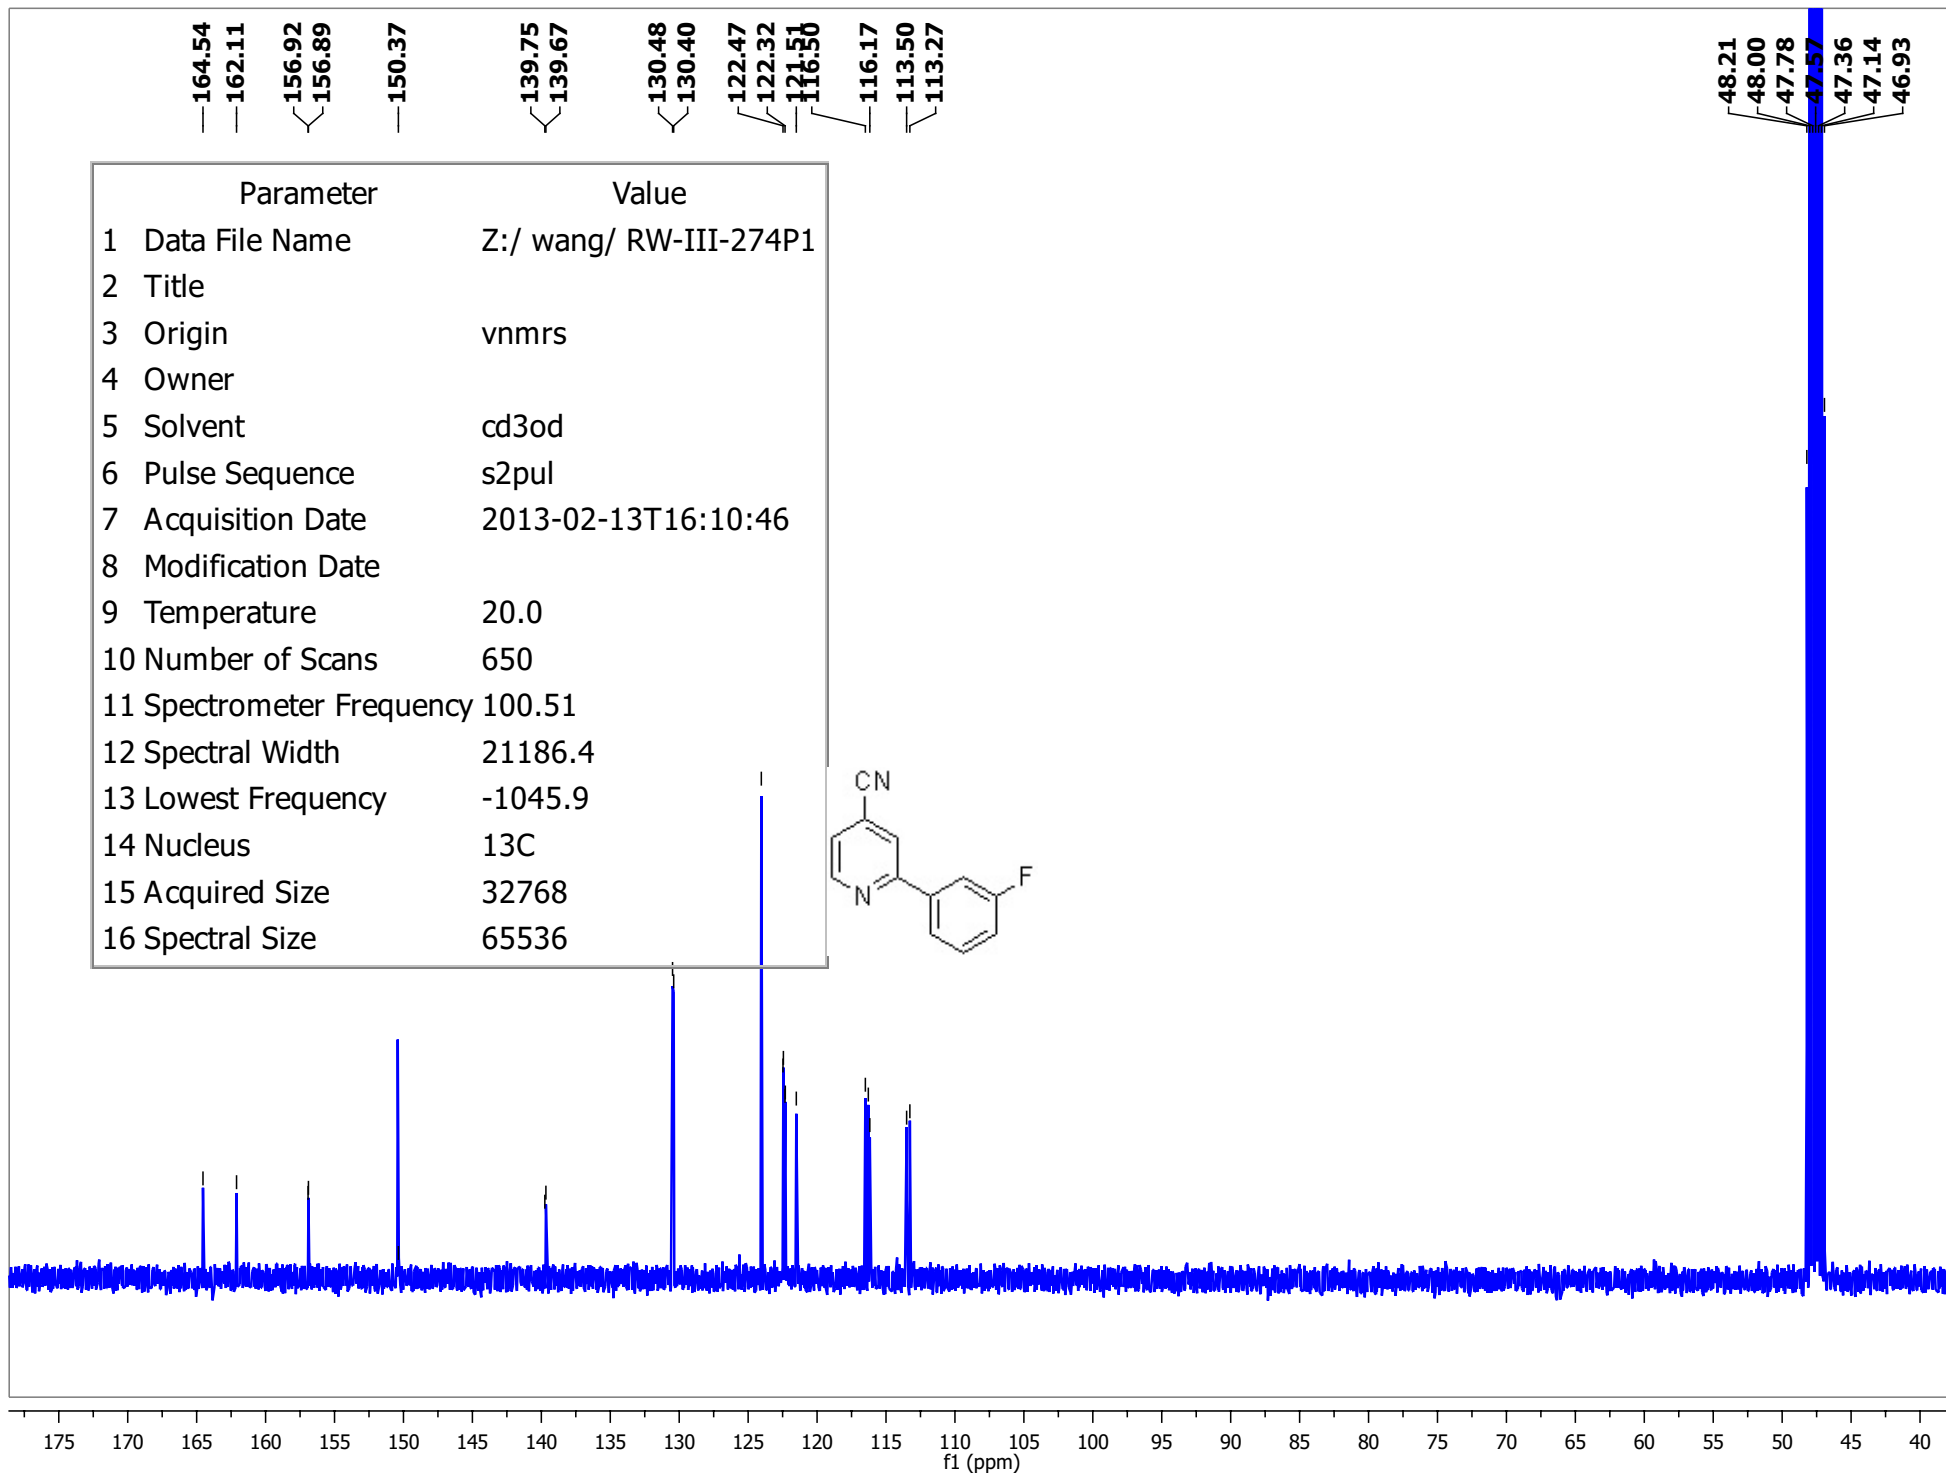

8.85  
8.78  
8.77

7.85  
7.83

7.47  
7.45  
7.42  
7.42  
7.41  
7.32  
7.31  
7.30  
7.29  
7.27  
7.27

4.86

3.30

| Parameter                 | Value                   |
|---------------------------|-------------------------|
| 1 Data/File Name          | Z:/ wang/ RW-III-274P2H |
| 2 Title                   |                         |
| 3 Origin                  | vnmrs                   |
| 4 Owner                   |                         |
| 5 Solvent                 | cd3od                   |
| 6 Pulse Sequence          | s2pul                   |
| 7 Acquisition Date        | 2013-02-13T15:39:46     |
| 8 Modification Date       |                         |
| 9 Temperature             | 20.0                    |
| 10 Number of Scans        | 33                      |
| 11 Spectrometer Frequency | 399.67                  |
| 12 Spectral Width         | 6410.3                  |
| 13 Lowest Frequency       | -807.1                  |
| 14 Nucleus                | 1H                      |
| 15 Acquired Size          | 16384                   |
| 16 Spectral Size          | 32768                   |

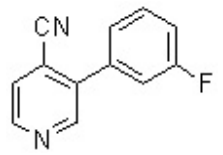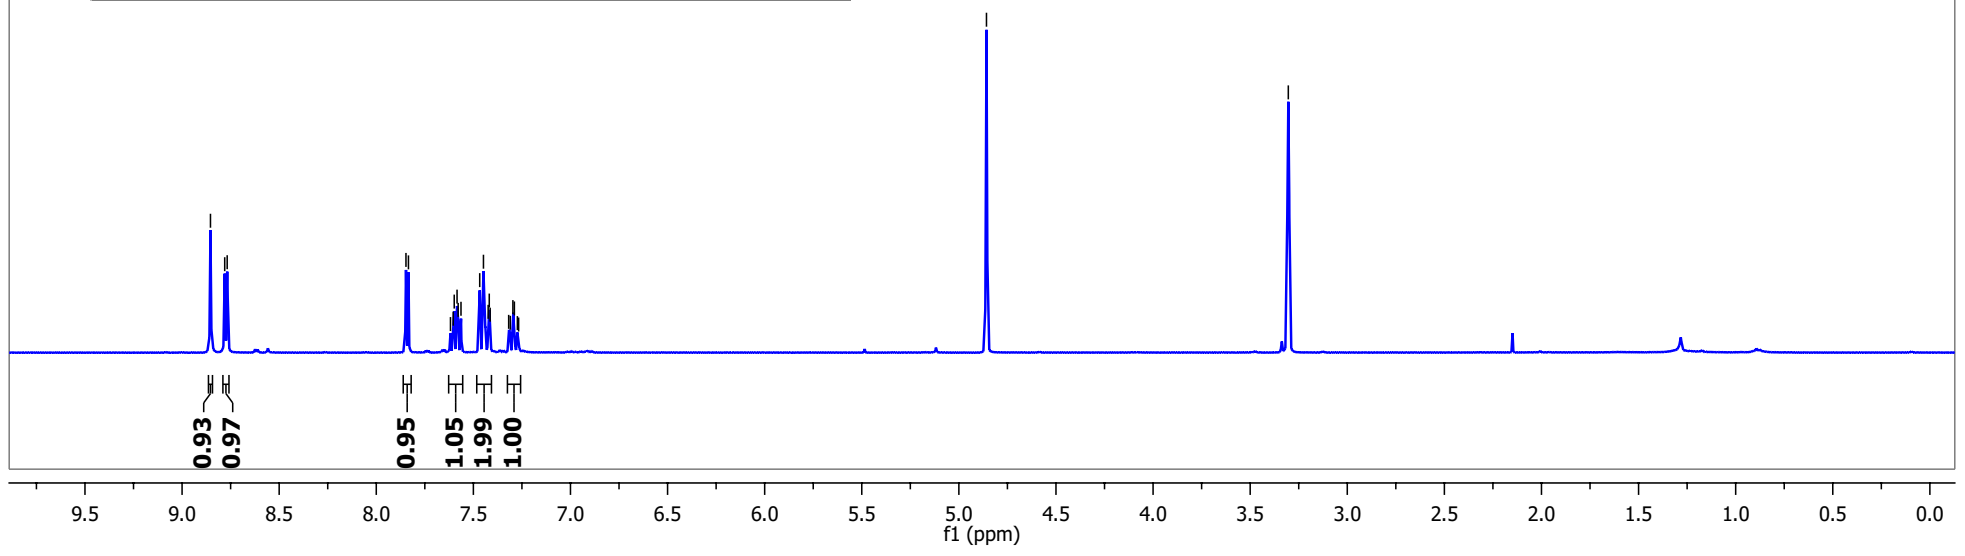

0.93  
0.97

0.95

1.05  
1.99  
1.00

4.86

3.30

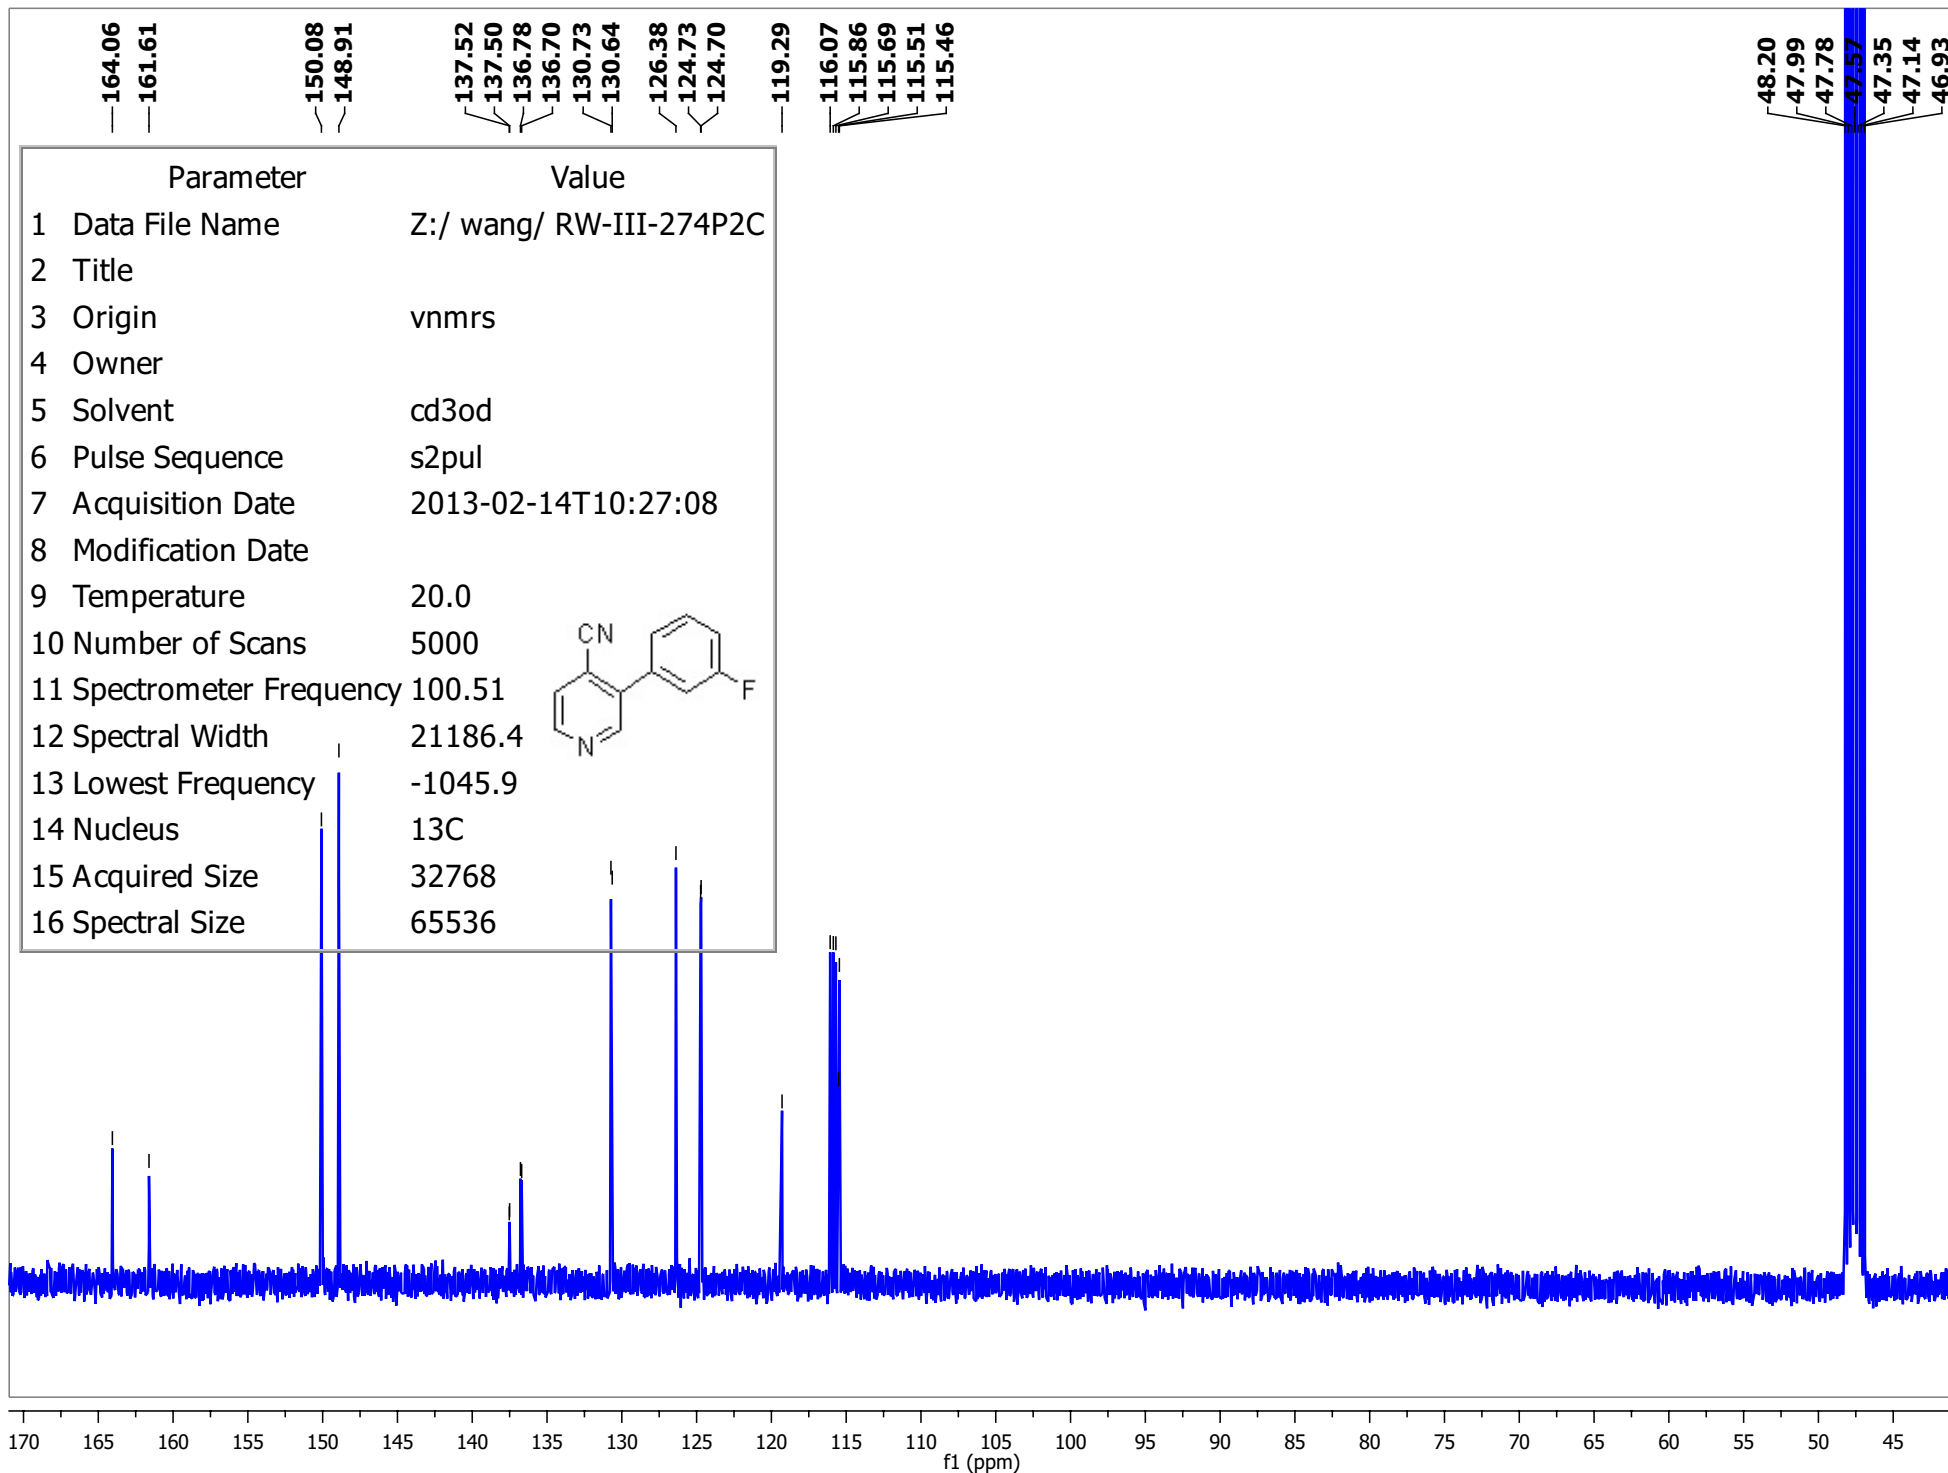

\_pslabel\_02

| Parameter                 | Value                                                     |
|---------------------------|-----------------------------------------------------------|
| 1 Data File Name          | X:/ wang/ RW-III-274P2C_20130213_02/ _pslabel_02.fid/ fid |
| 2 Title                   | _pslabel_02                                               |
| 3 Comment                 |                                                           |
| 4 Origin                  | Varian                                                    |
| 5 Spectrometer            | vnmrs                                                     |
| 6 Solvent                 | cd3od                                                     |
| 7 Temperature             | 20.0                                                      |
| 8 Pulse Sequence          | s2pul                                                     |
| 9 Experiment              | 1D                                                        |
| 10 Relaxation Delay       | 1.0000                                                    |
| 11 Acquisition Time       | 0.7340                                                    |
| 12 Acquisition Date       | 2013-02-13T12:28:02                                       |
| 13 Spectrometer Frequency | 376.04                                                    |
| 14 Nucleus                | 19F                                                       |

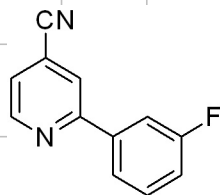

-113.98  
-114.00  
-114.01  
-114.02  
-114.03  
-114.05

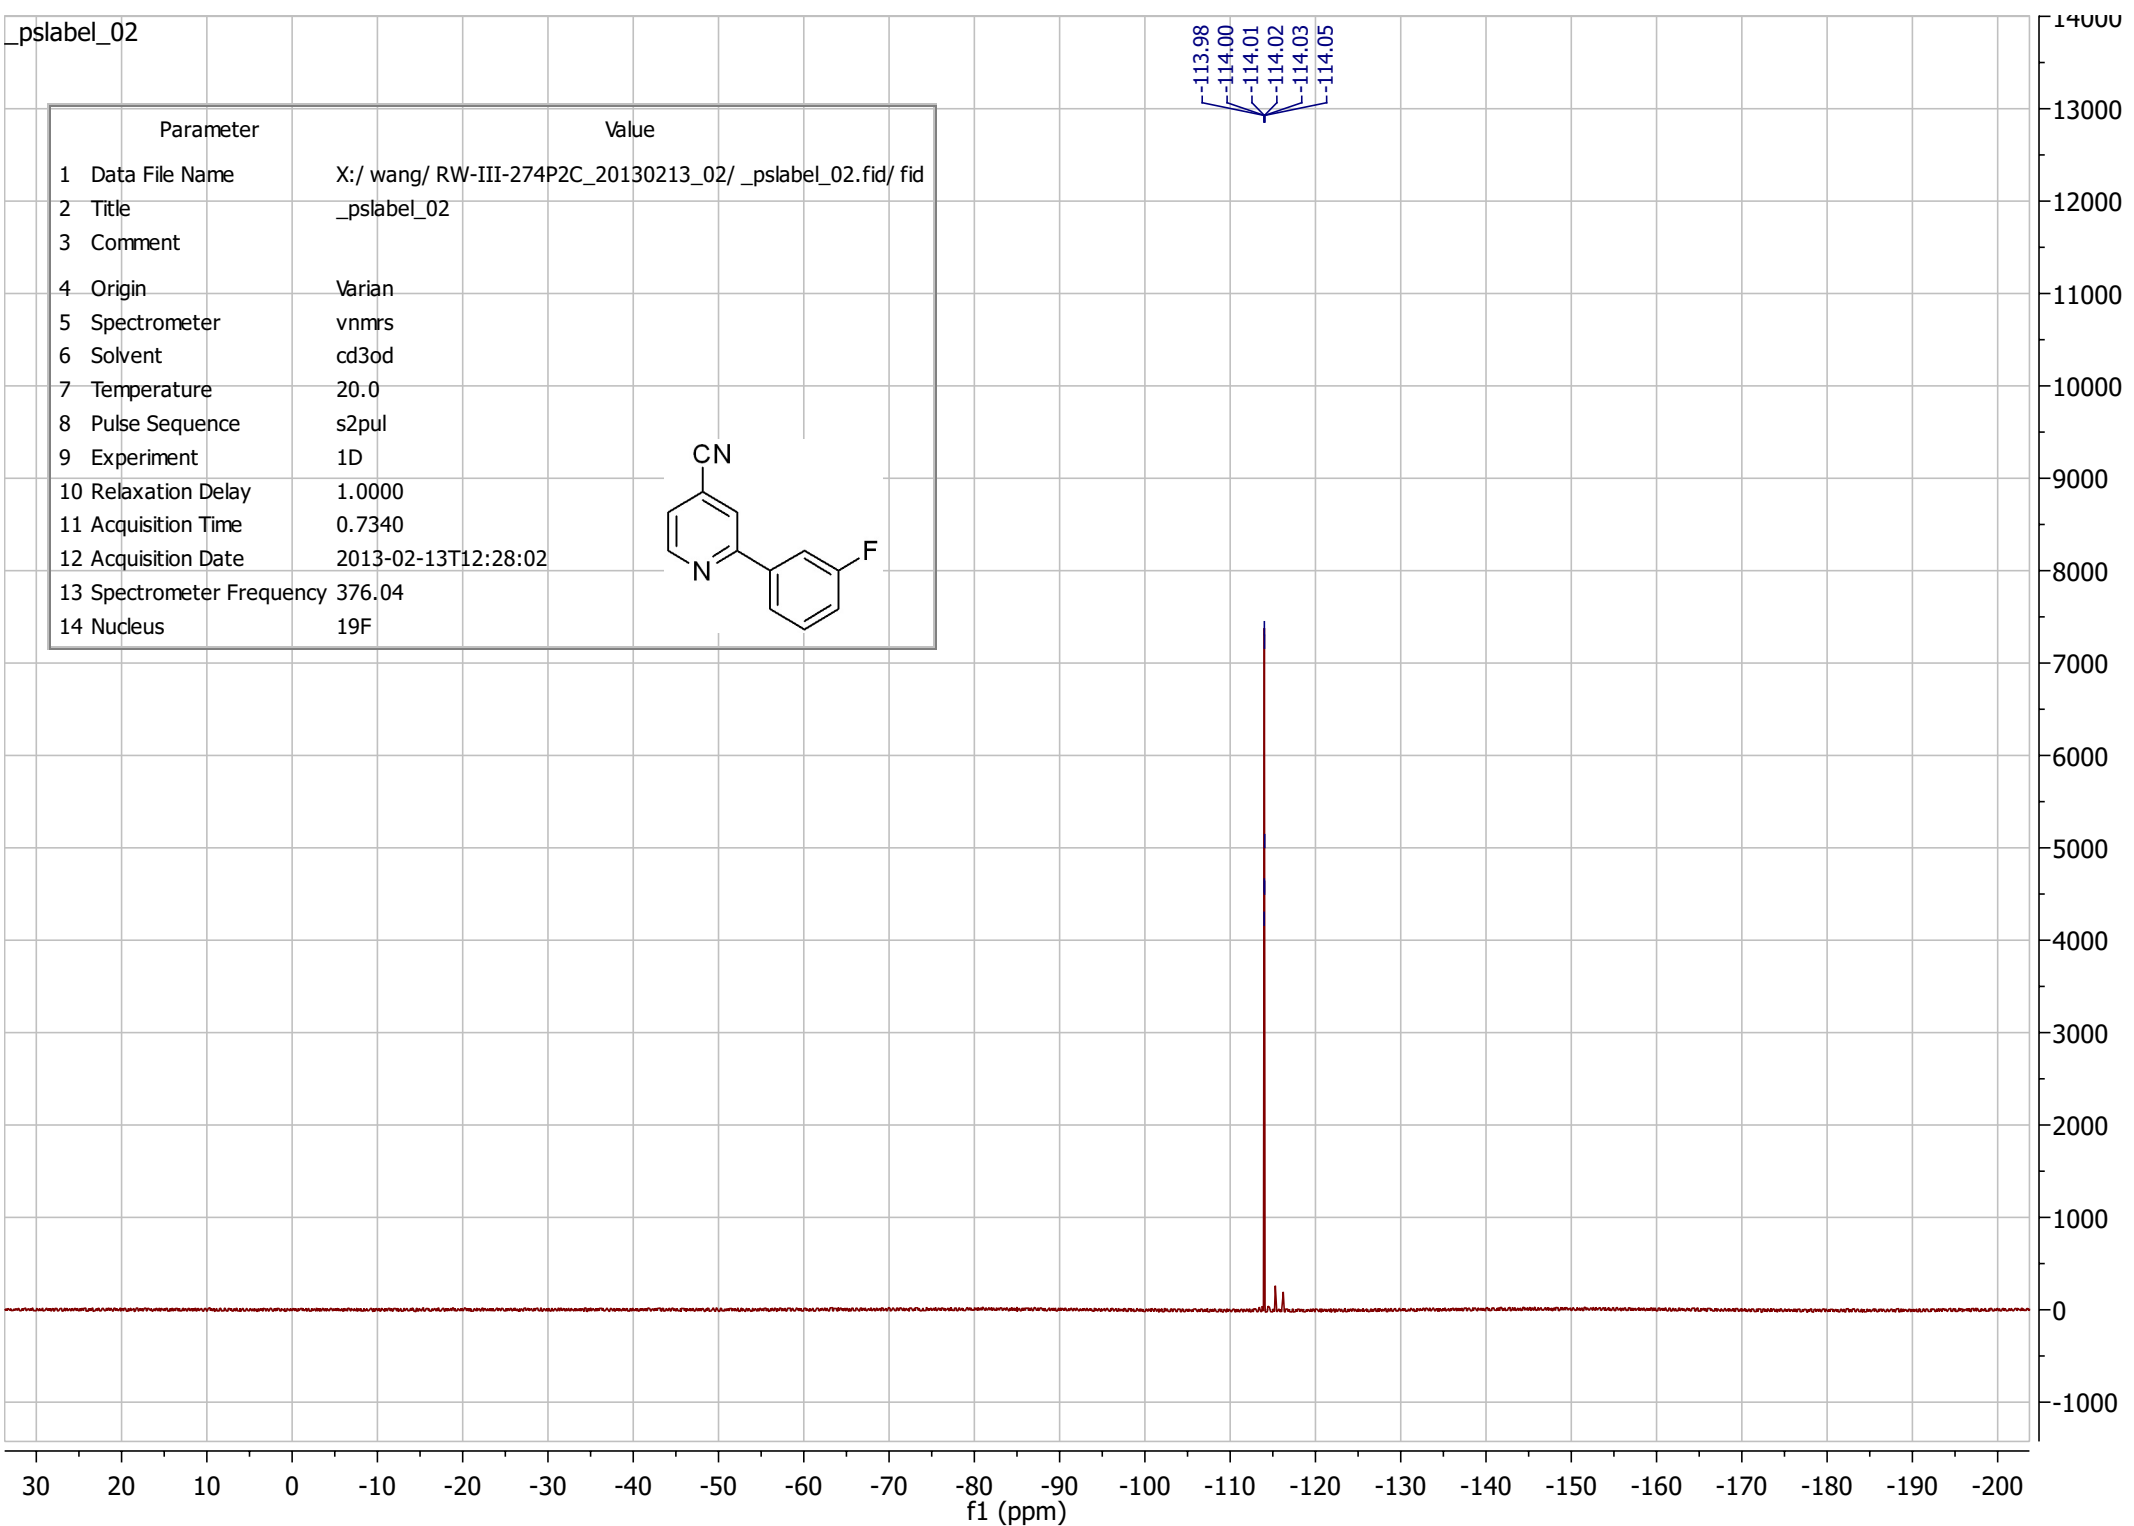

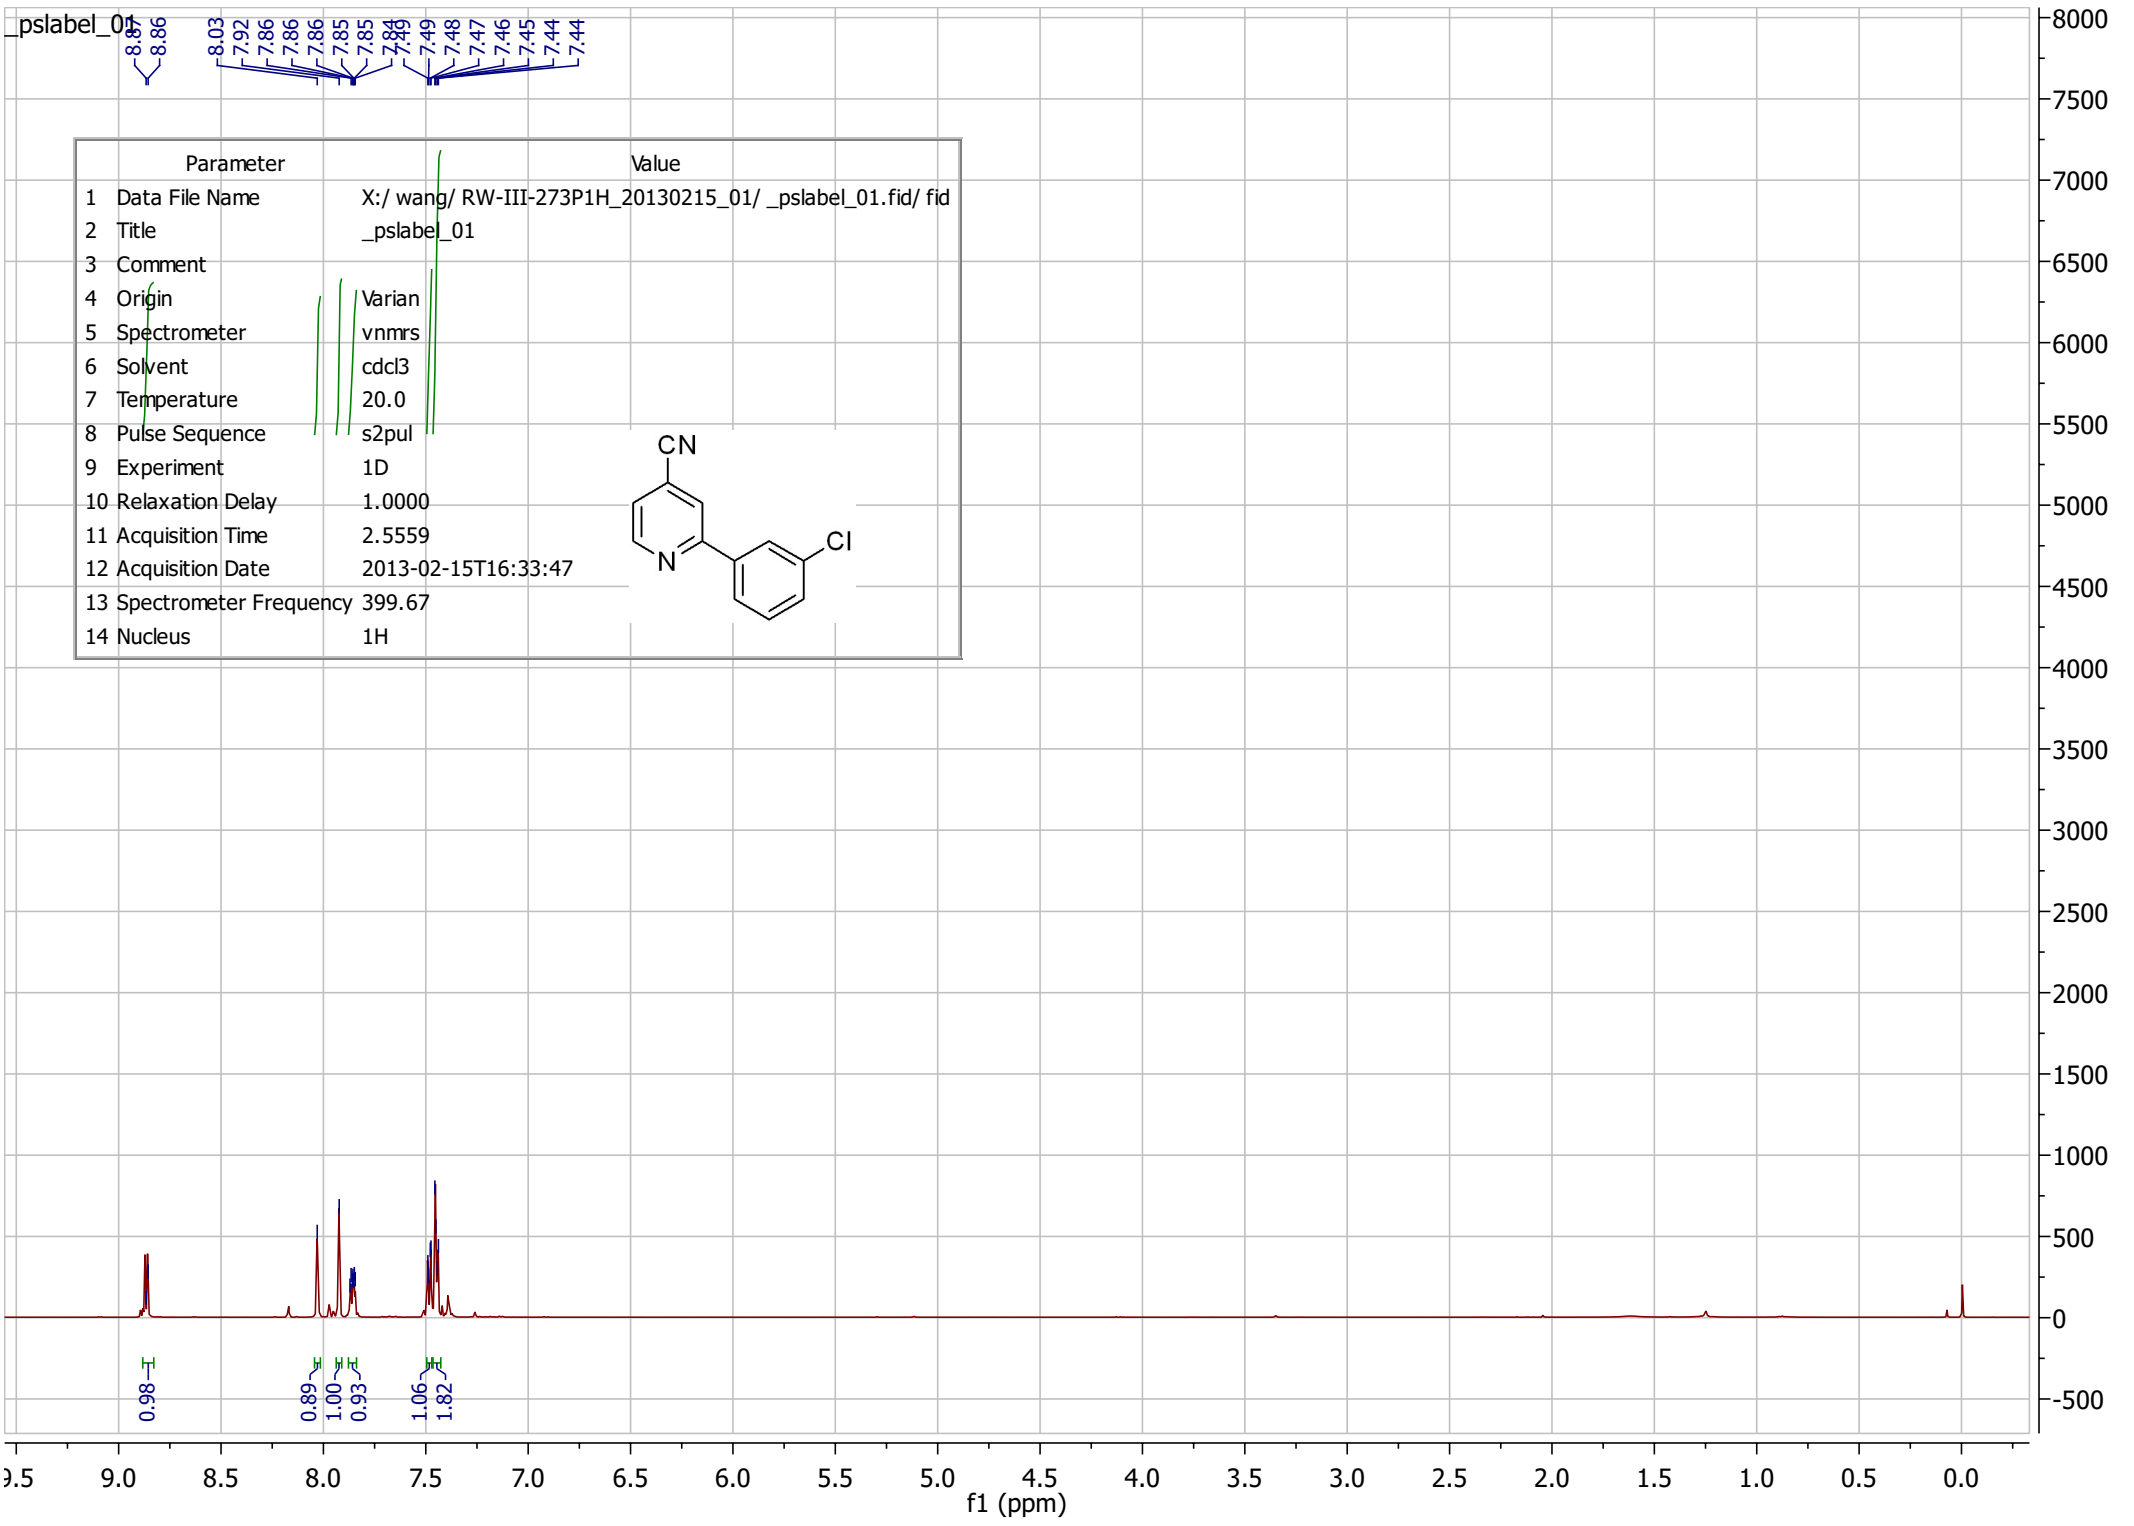

| Parameter                 | Value                                                    |
|---------------------------|----------------------------------------------------------|
| 1 Data File Name          | X:/ wang/ RW-III-273P1H_20130215_01/_pslabel_01.fid/ fid |
| 2 Title                   | _pslabel_01                                              |
| 3 Comment                 |                                                          |
| 4 Origin                  | Varian                                                   |
| 5 Spectrometer            | vnmrs                                                    |
| 6 Solvent                 | cdcl3                                                    |
| 7 Temperature             | 20.0                                                     |
| 8 Pulse Sequence          | s2pul                                                    |
| 9 Experiment              | 1D                                                       |
| 10 Relaxation Delay       | 1.0000                                                   |
| 11 Acquisition Time       | 2.5559                                                   |
| 12 Acquisition Date       | 2013-02-15T16:33:47                                      |
| 13 Spectrometer Frequency | 399.67                                                   |
| 14 Nucleus                | 1H                                                       |

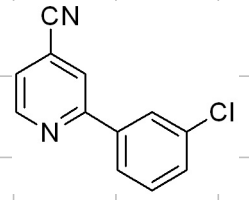

0.98

0.89

1.00

0.93

1.06

1.82

f1 (ppm)

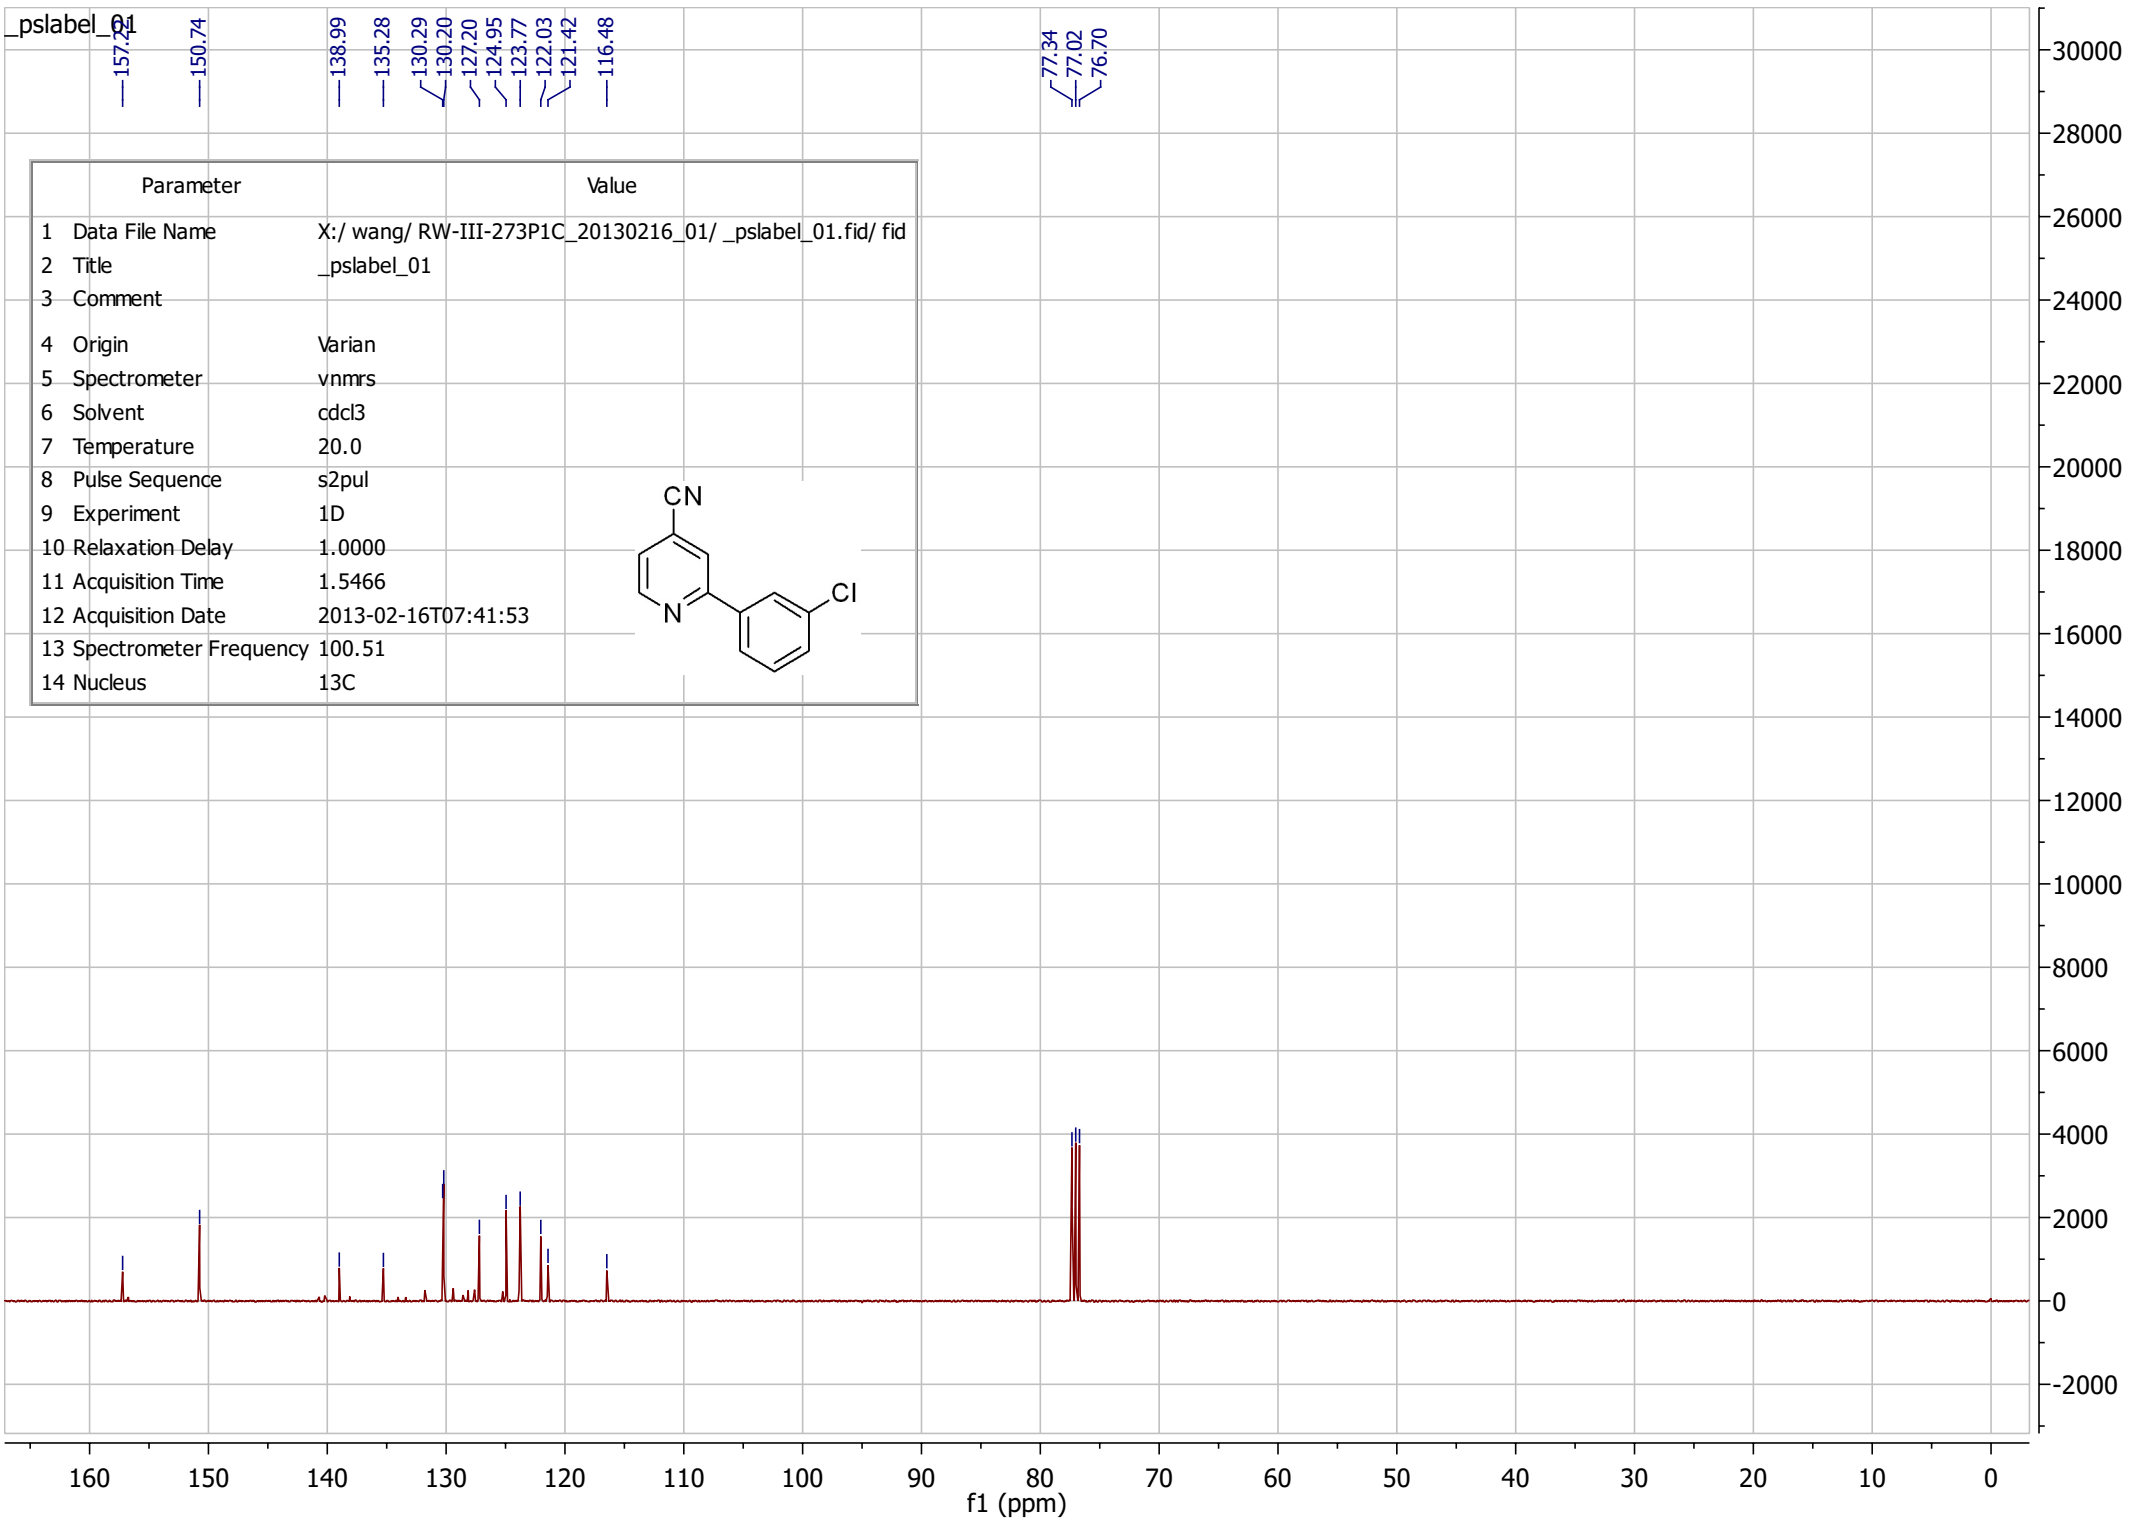

\_pslabel\_01

8.85  
8.80  
8.79

7.65  
7.64  
7.56  
7.55  
7.51  
7.50  
7.49  
7.49  
7.48

-0.00

| Parameter                 | Value                                                    |
|---------------------------|----------------------------------------------------------|
| 1 Data File Name          | X:/ wang/ RW-III-273P2H_20130215_01/_pslabel_01.fid/ fid |
| 2 Title                   | _pslabel_01                                              |
| 3 Comment                 |                                                          |
| 4 Origin                  | Varian                                                   |
| 5 Spectrometer            | vnmrs                                                    |
| 6 Solvent                 | cdcl3                                                    |
| 7 Temperature             | 20.0                                                     |
| 8 Pulse Sequence          | s2pul                                                    |
| 9 Experiment              | 1D                                                       |
| 10 Relaxation Delay       | 1.0000                                                   |
| 11 Acquisition Time       | 2.5559                                                   |
| 12 Acquisition Date       | 2013-02-15T16:39:58                                      |
| 13 Spectrometer Frequency | 399.67                                                   |
| 14 Nucleus                | 1H                                                       |

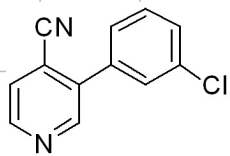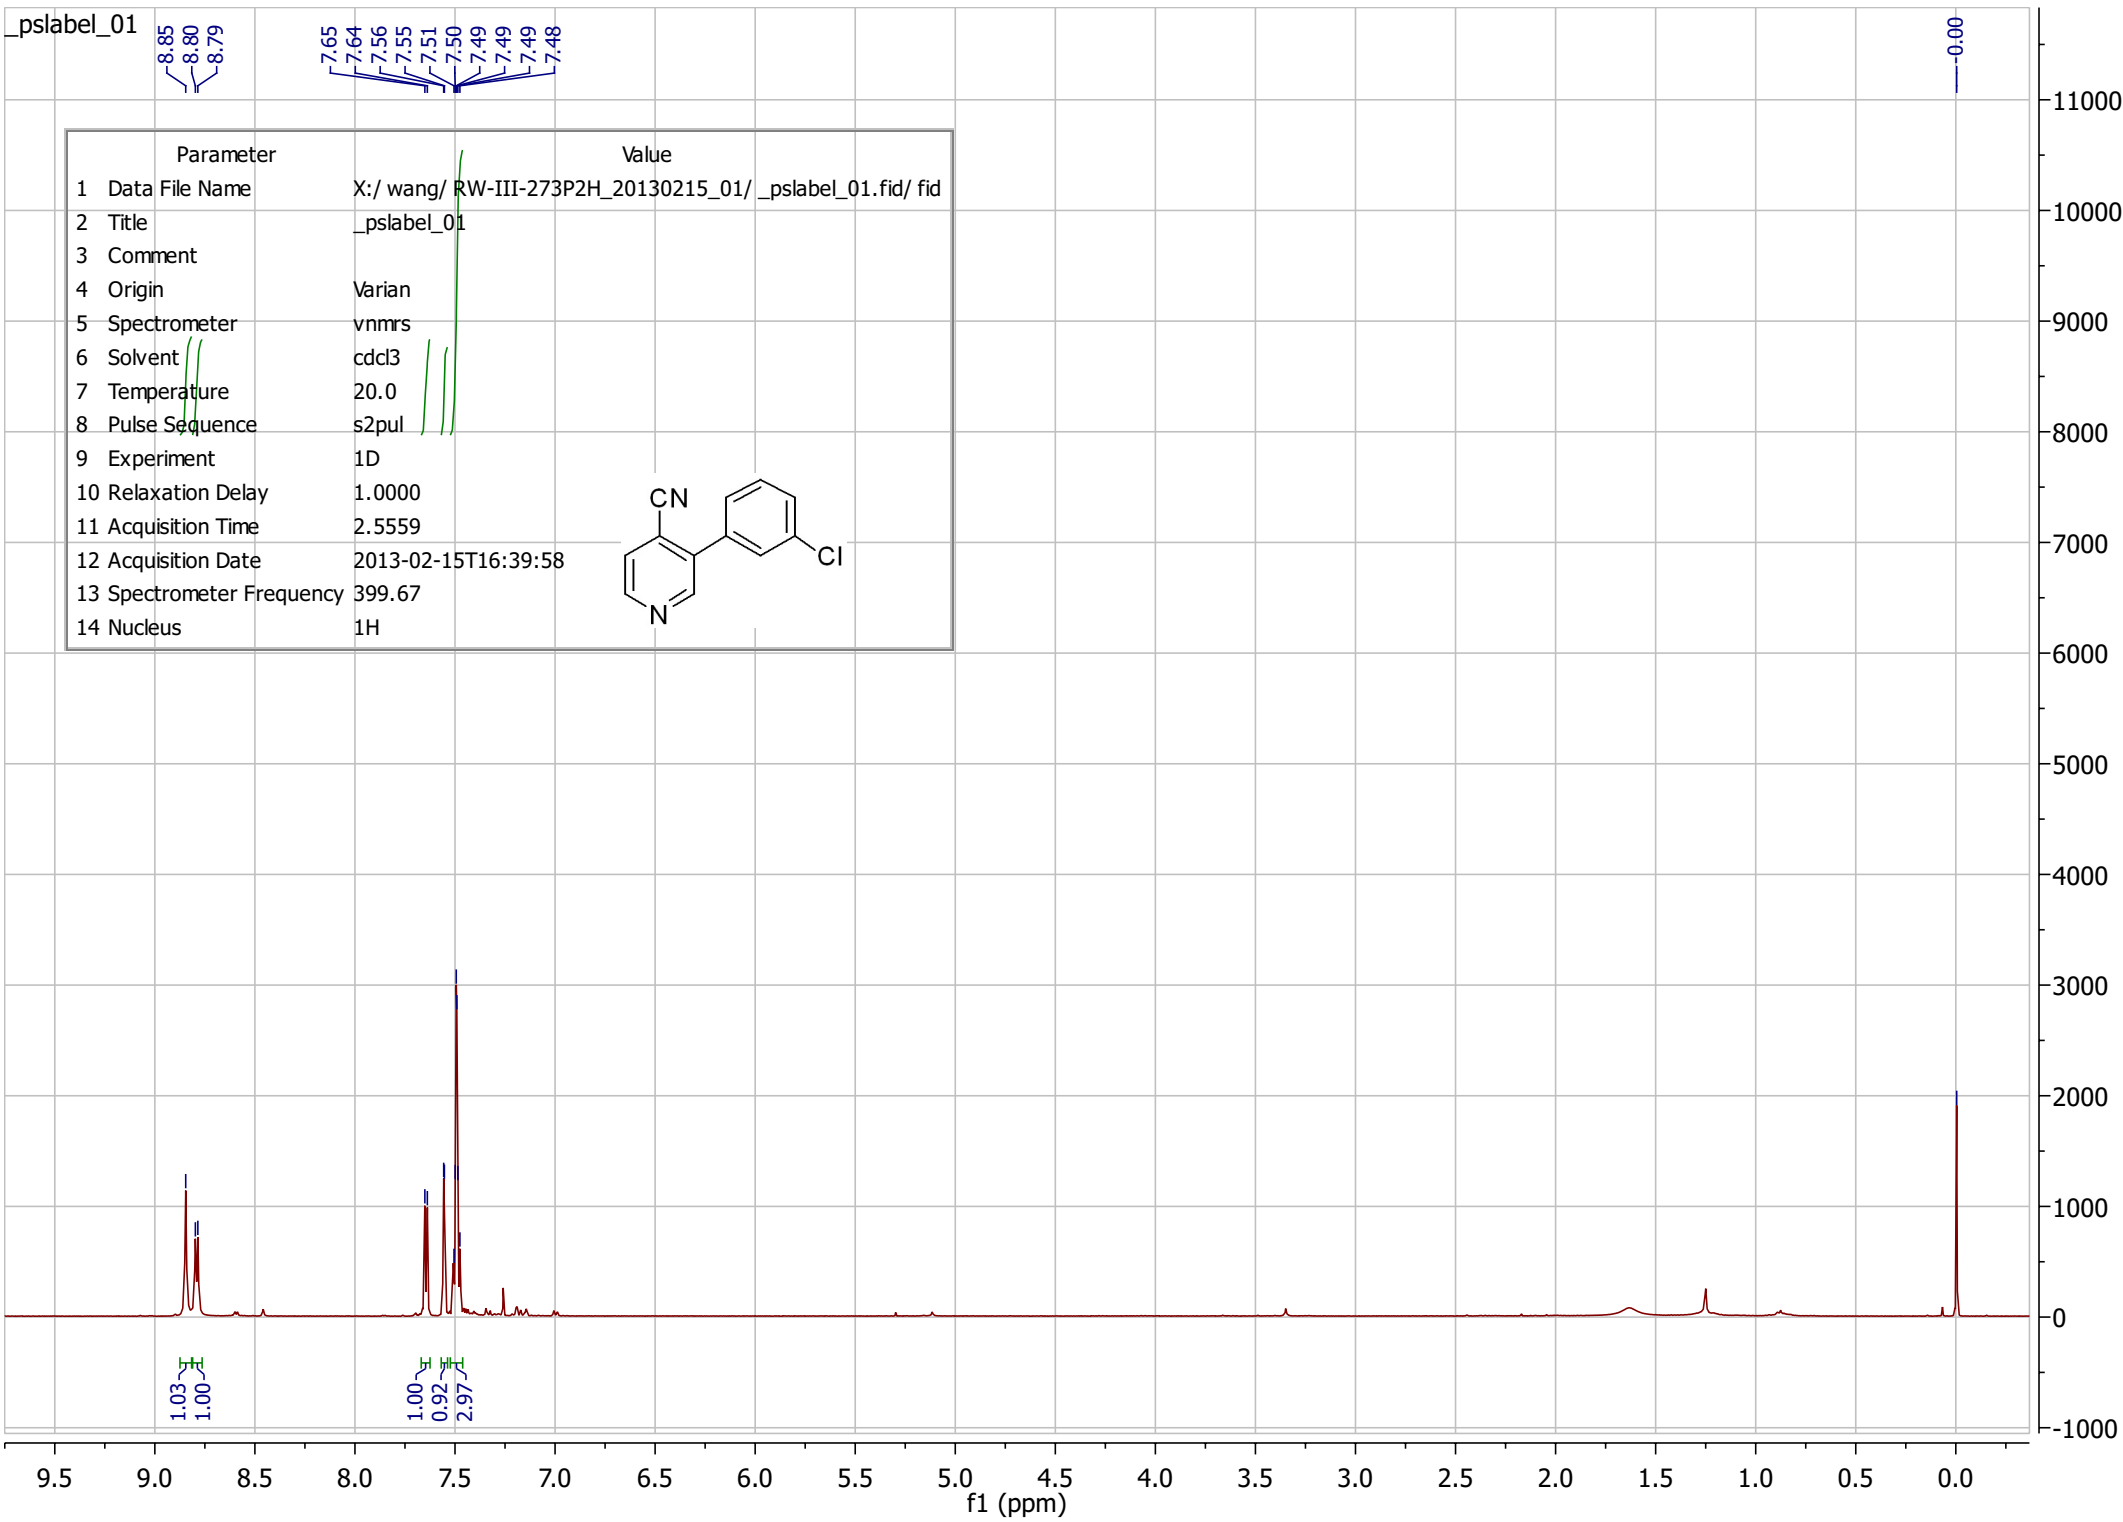

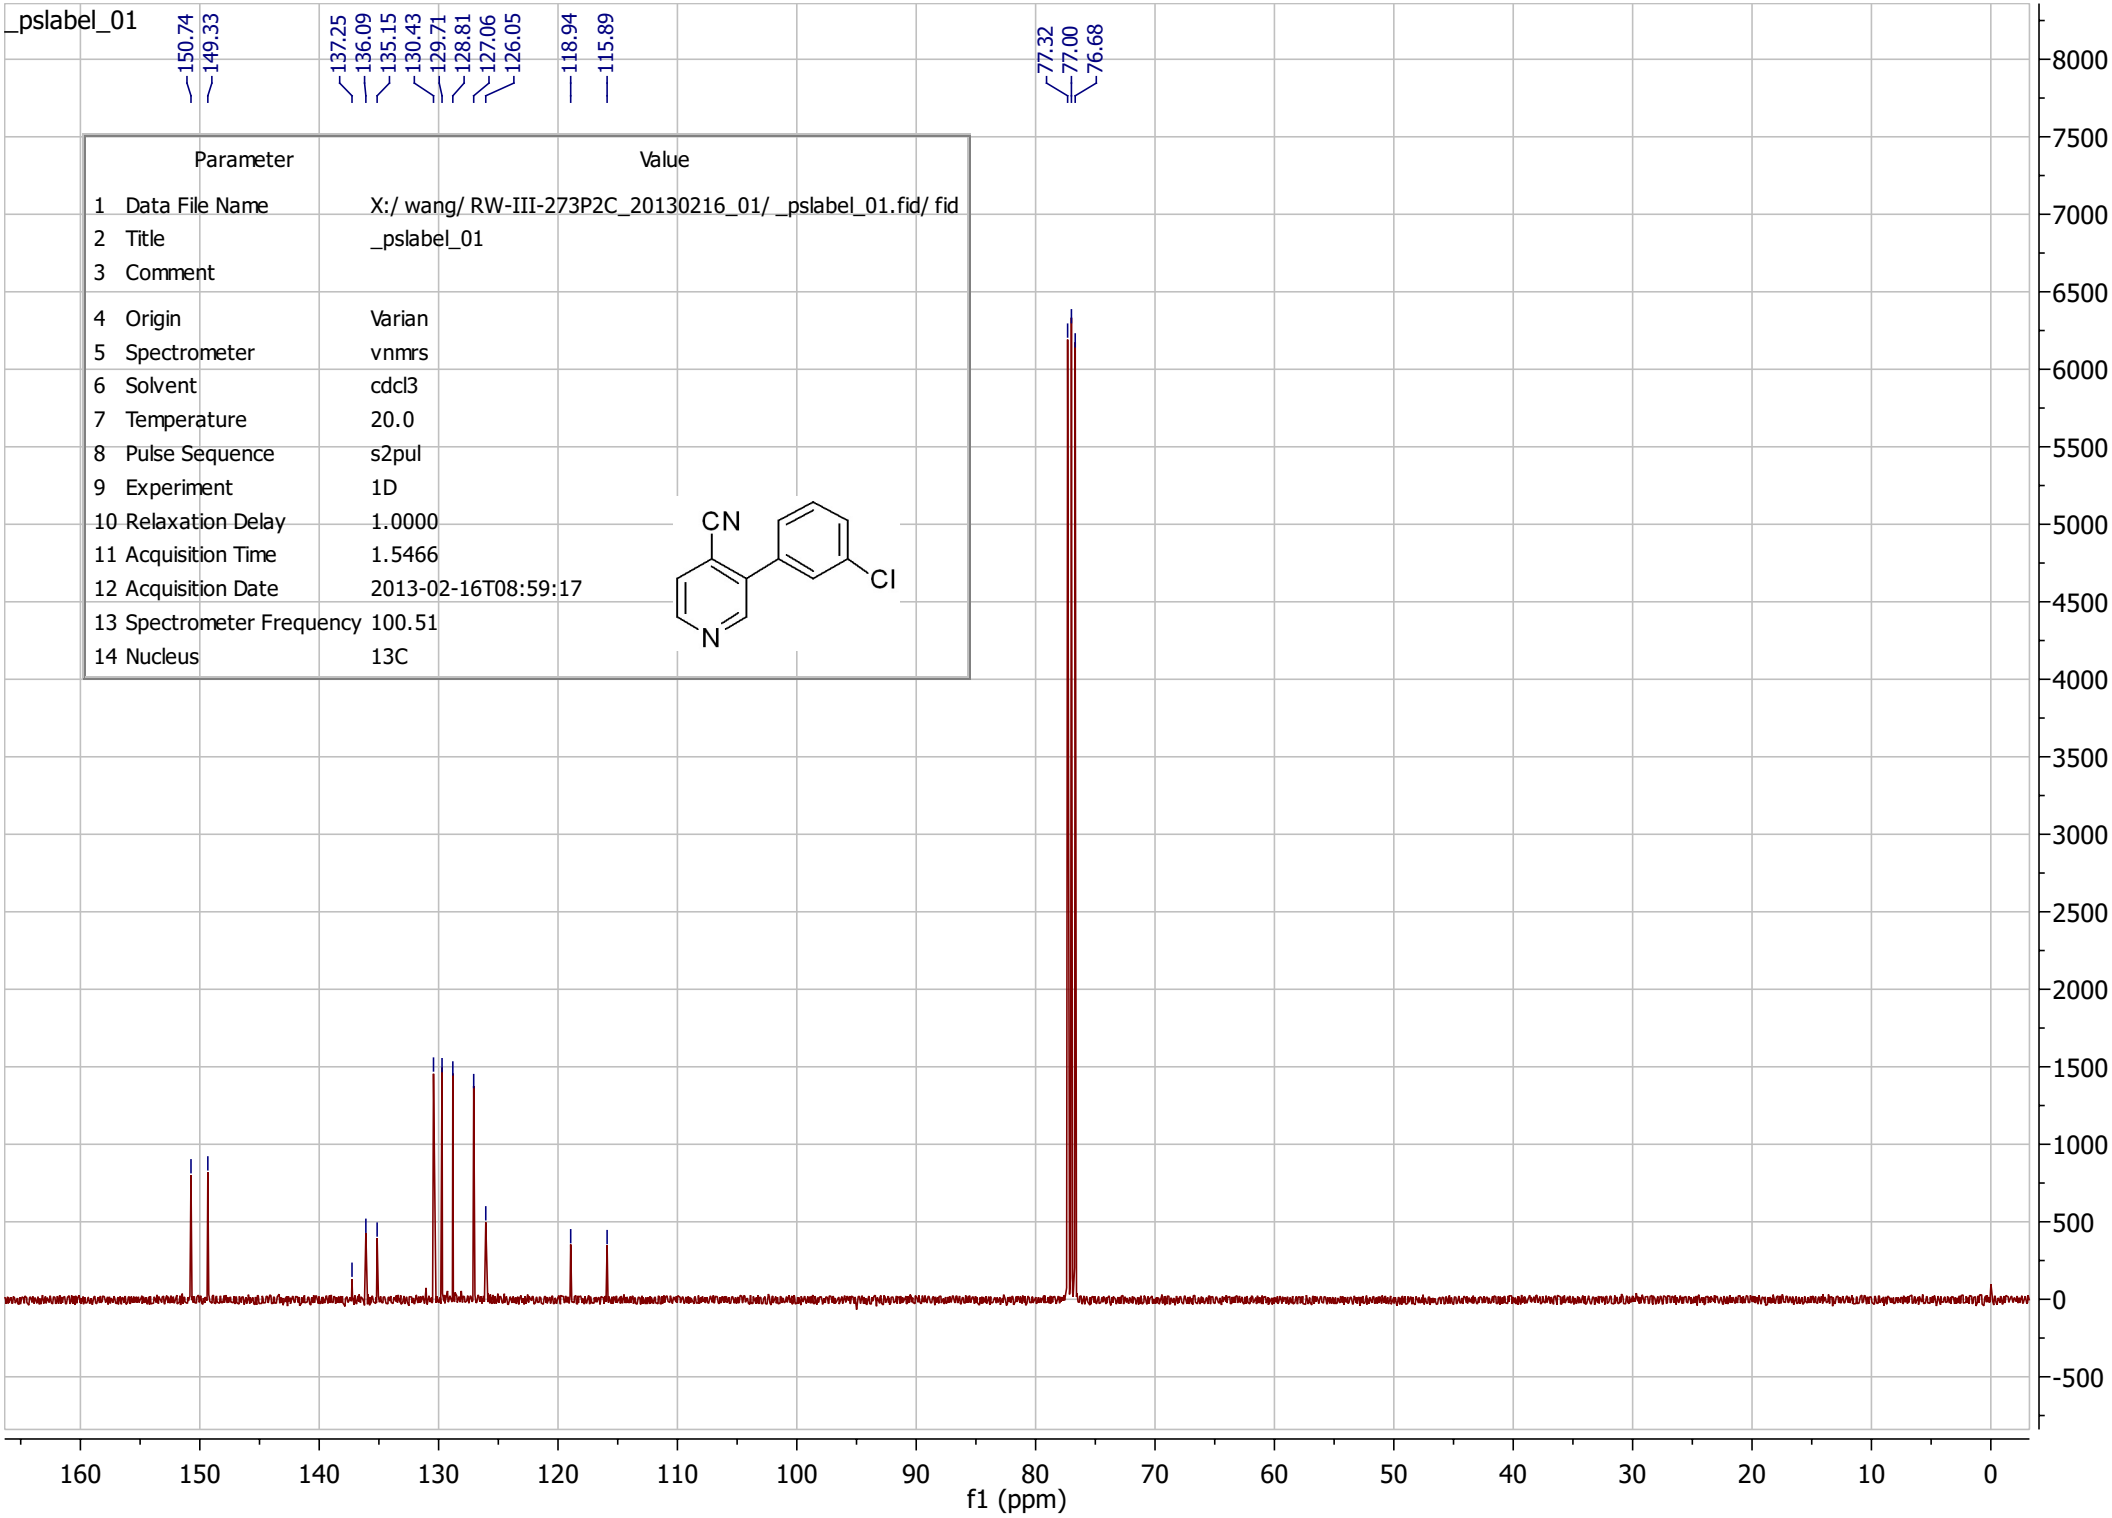



8.90  
8.89  
8.88  
8.88  
8.64  
8.63  
8.22  
8.16  
9.82  
7.50  
7.48  
7.26

4.46  
4.45  
4.43  
4.41

1.46  
1.44  
1.42

| Parameter                 | Value                   |
|---------------------------|-------------------------|
| 1 Data File Name          | Z:/ wang/ RW-III-275P2H |
| 2 Title                   |                         |
| 3 Origin                  | vnMrs                   |
| 4 Owner                   |                         |
| 5 Solvent                 | cdCl3                   |
| 6 Pulse Sequence          | s2pul                   |
| 7 Acquisition Date        | 2013-02-19T20:51:43     |
| 8 Modification Date       |                         |
| 9 Temperature             | 20.0                    |
| 10 Number of Scans        | 33                      |
| 11 Spectrometer Frequency | 399.67                  |
| 12 Spectral Width         | 6410.3                  |
| 13 Lowest Frequency       | -807.1                  |
| 14 Nucleus                | 1H                      |
| 15 Acquired Size          | 16384                   |
| 16 Spectral Size          | 32768                   |

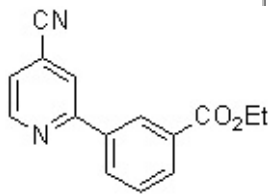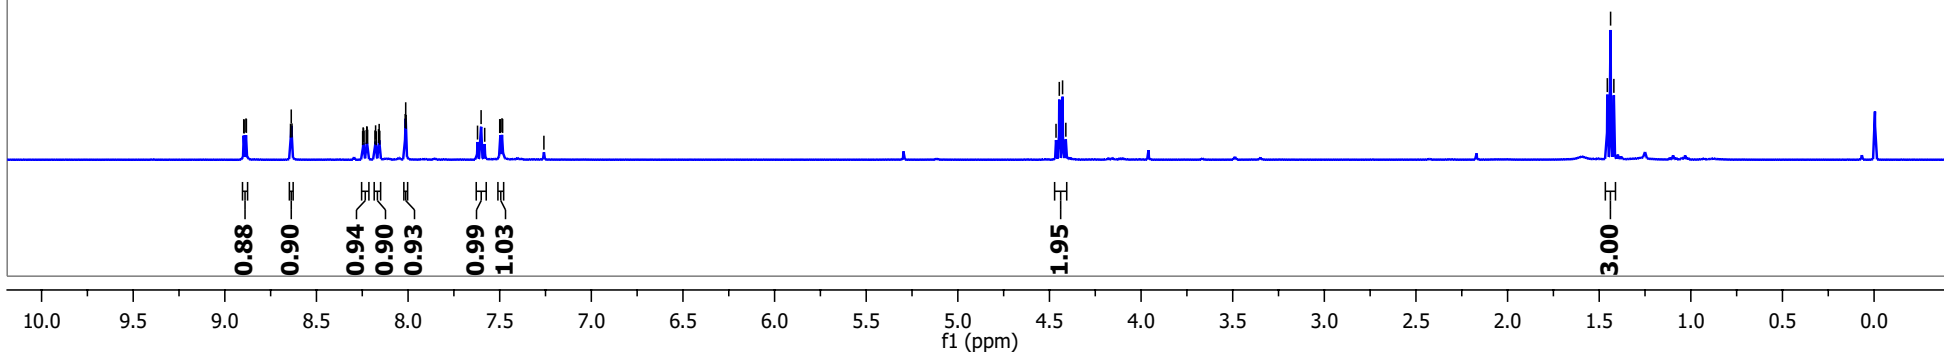

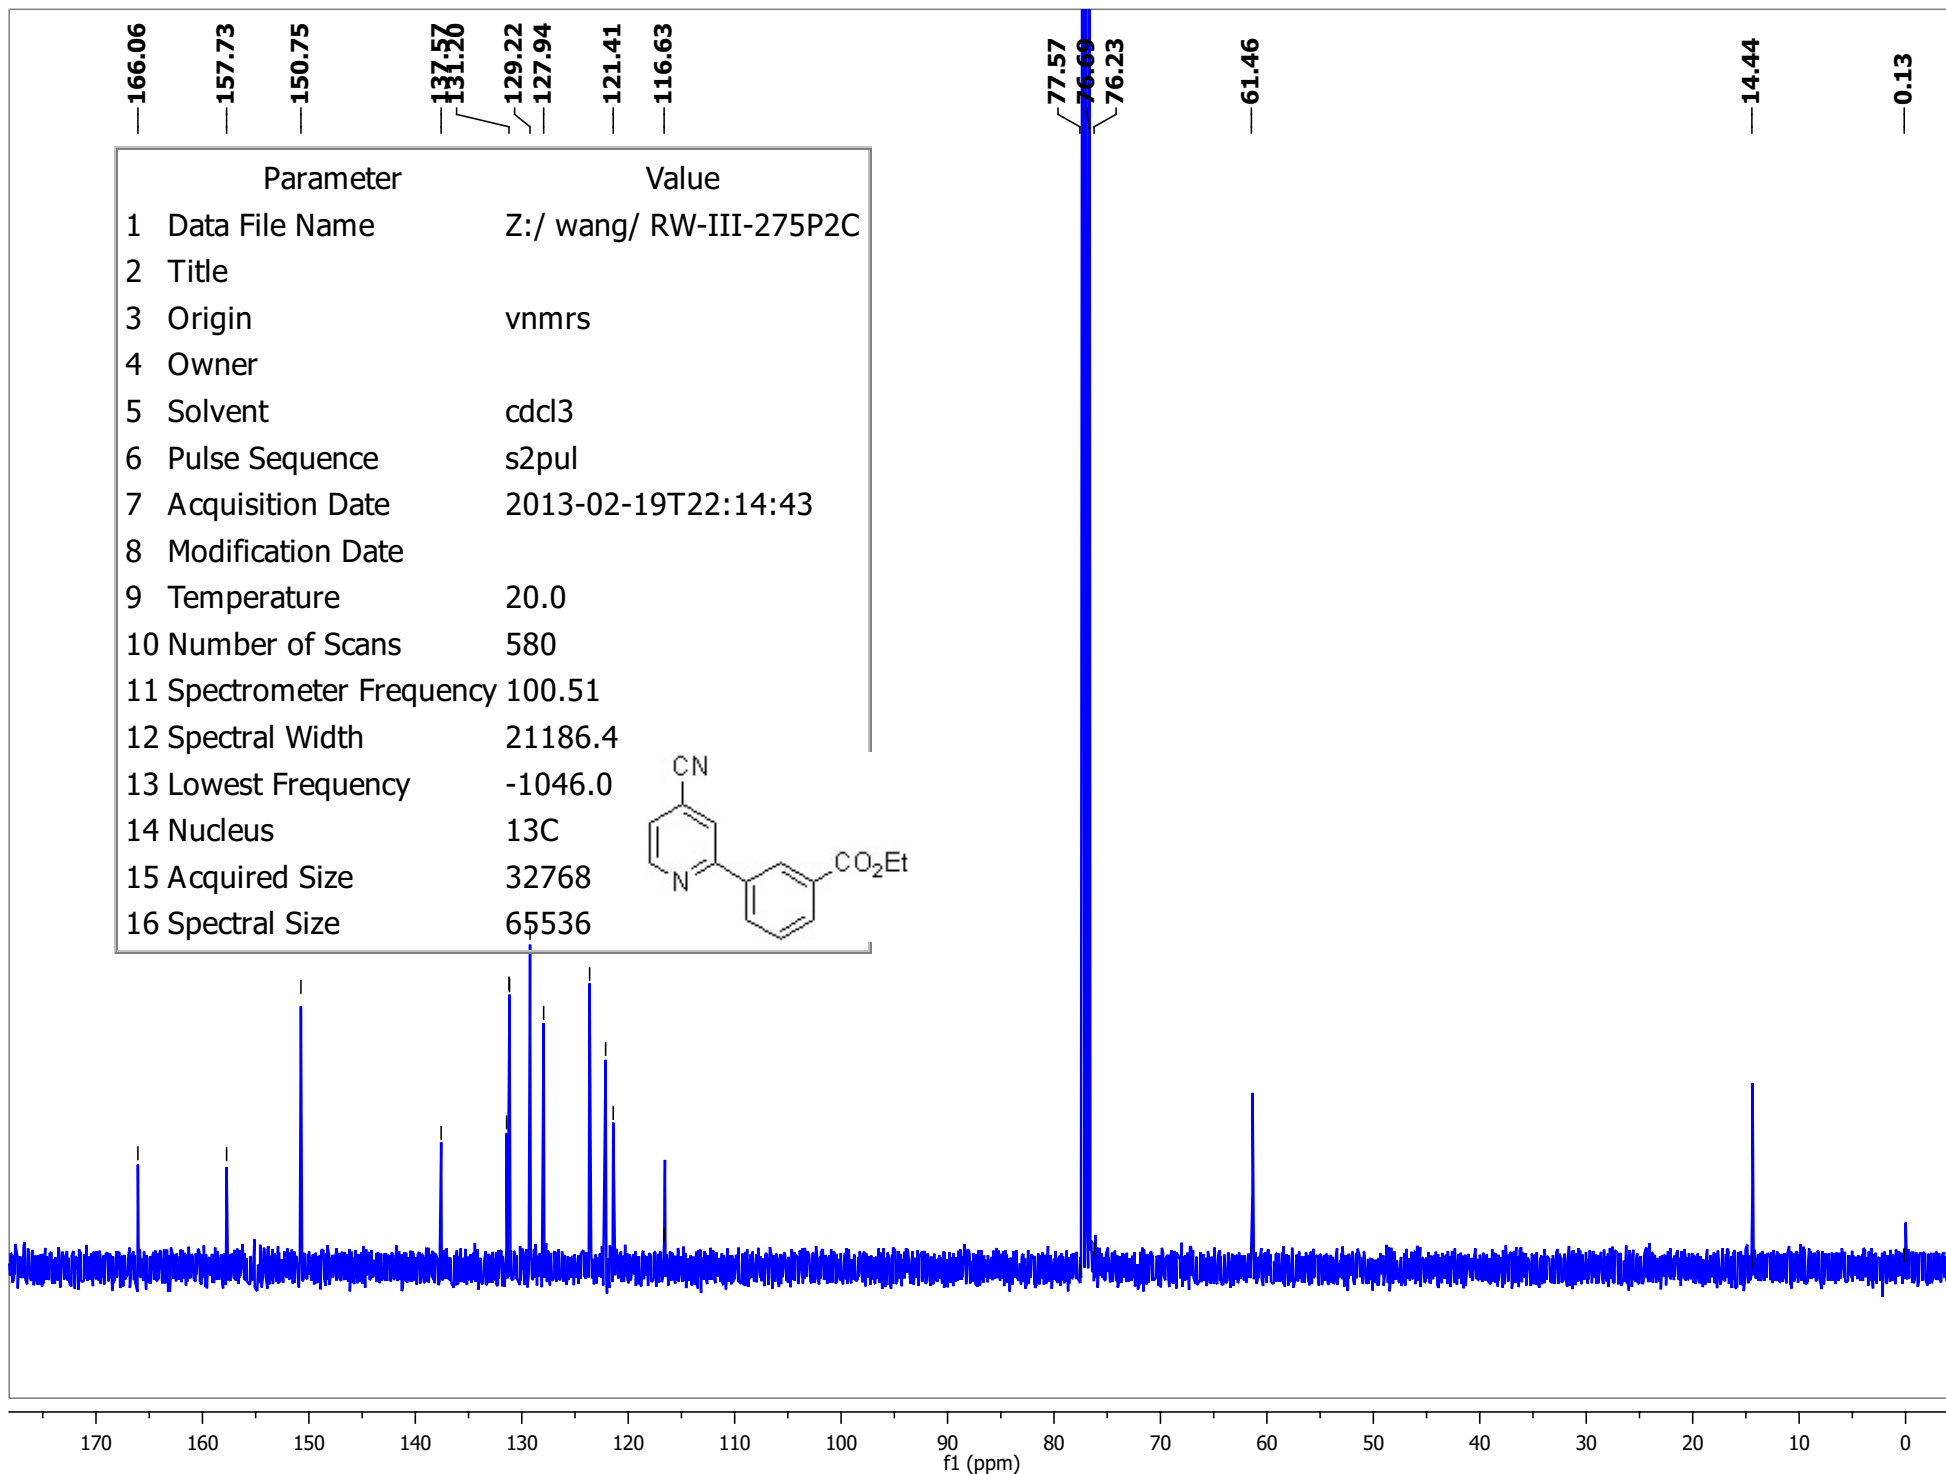

\_pslabel\_01

8.86  
8.85  
7.94  
7.94  
7.93  
7.59  
7.59  
7.58  
7.55  
7.53  
7.45  
7.44  
7.42  
7.40  
7.26  
7.05  
7.04  
7.03  
7.02

3.90

1.55

-0.00

| Parameter                 | Value                                                    |
|---------------------------|----------------------------------------------------------|
| 1 Data File Name          | X:/ wang/ RW-III-279P1H_20130308_01/_pslabel_01.fid/ fid |
| 2 Title                   | _pslabel_01                                              |
| 3 Comment                 |                                                          |
| 4 Origin                  | Varian                                                   |
| 5 Spectrometer            | vnmrs                                                    |
| 6 Solvent                 | cdcl3                                                    |
| 7 Temperature             | 20.0                                                     |
| 8 Pulse Sequence          | s2pul                                                    |
| 9 Experiment              | 1D                                                       |
| 10 Relaxation Delay       | 1.0000                                                   |
| 11 Acquisition Time       | 2.5559                                                   |
| 12 Acquisition Date       | 2013-03-08T08:58:22                                      |
| 13 Spectrometer Frequency | 399.67                                                   |
| 14 Nucleus                | 1H                                                       |

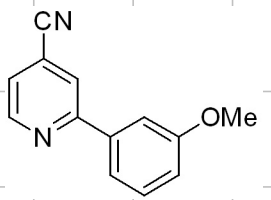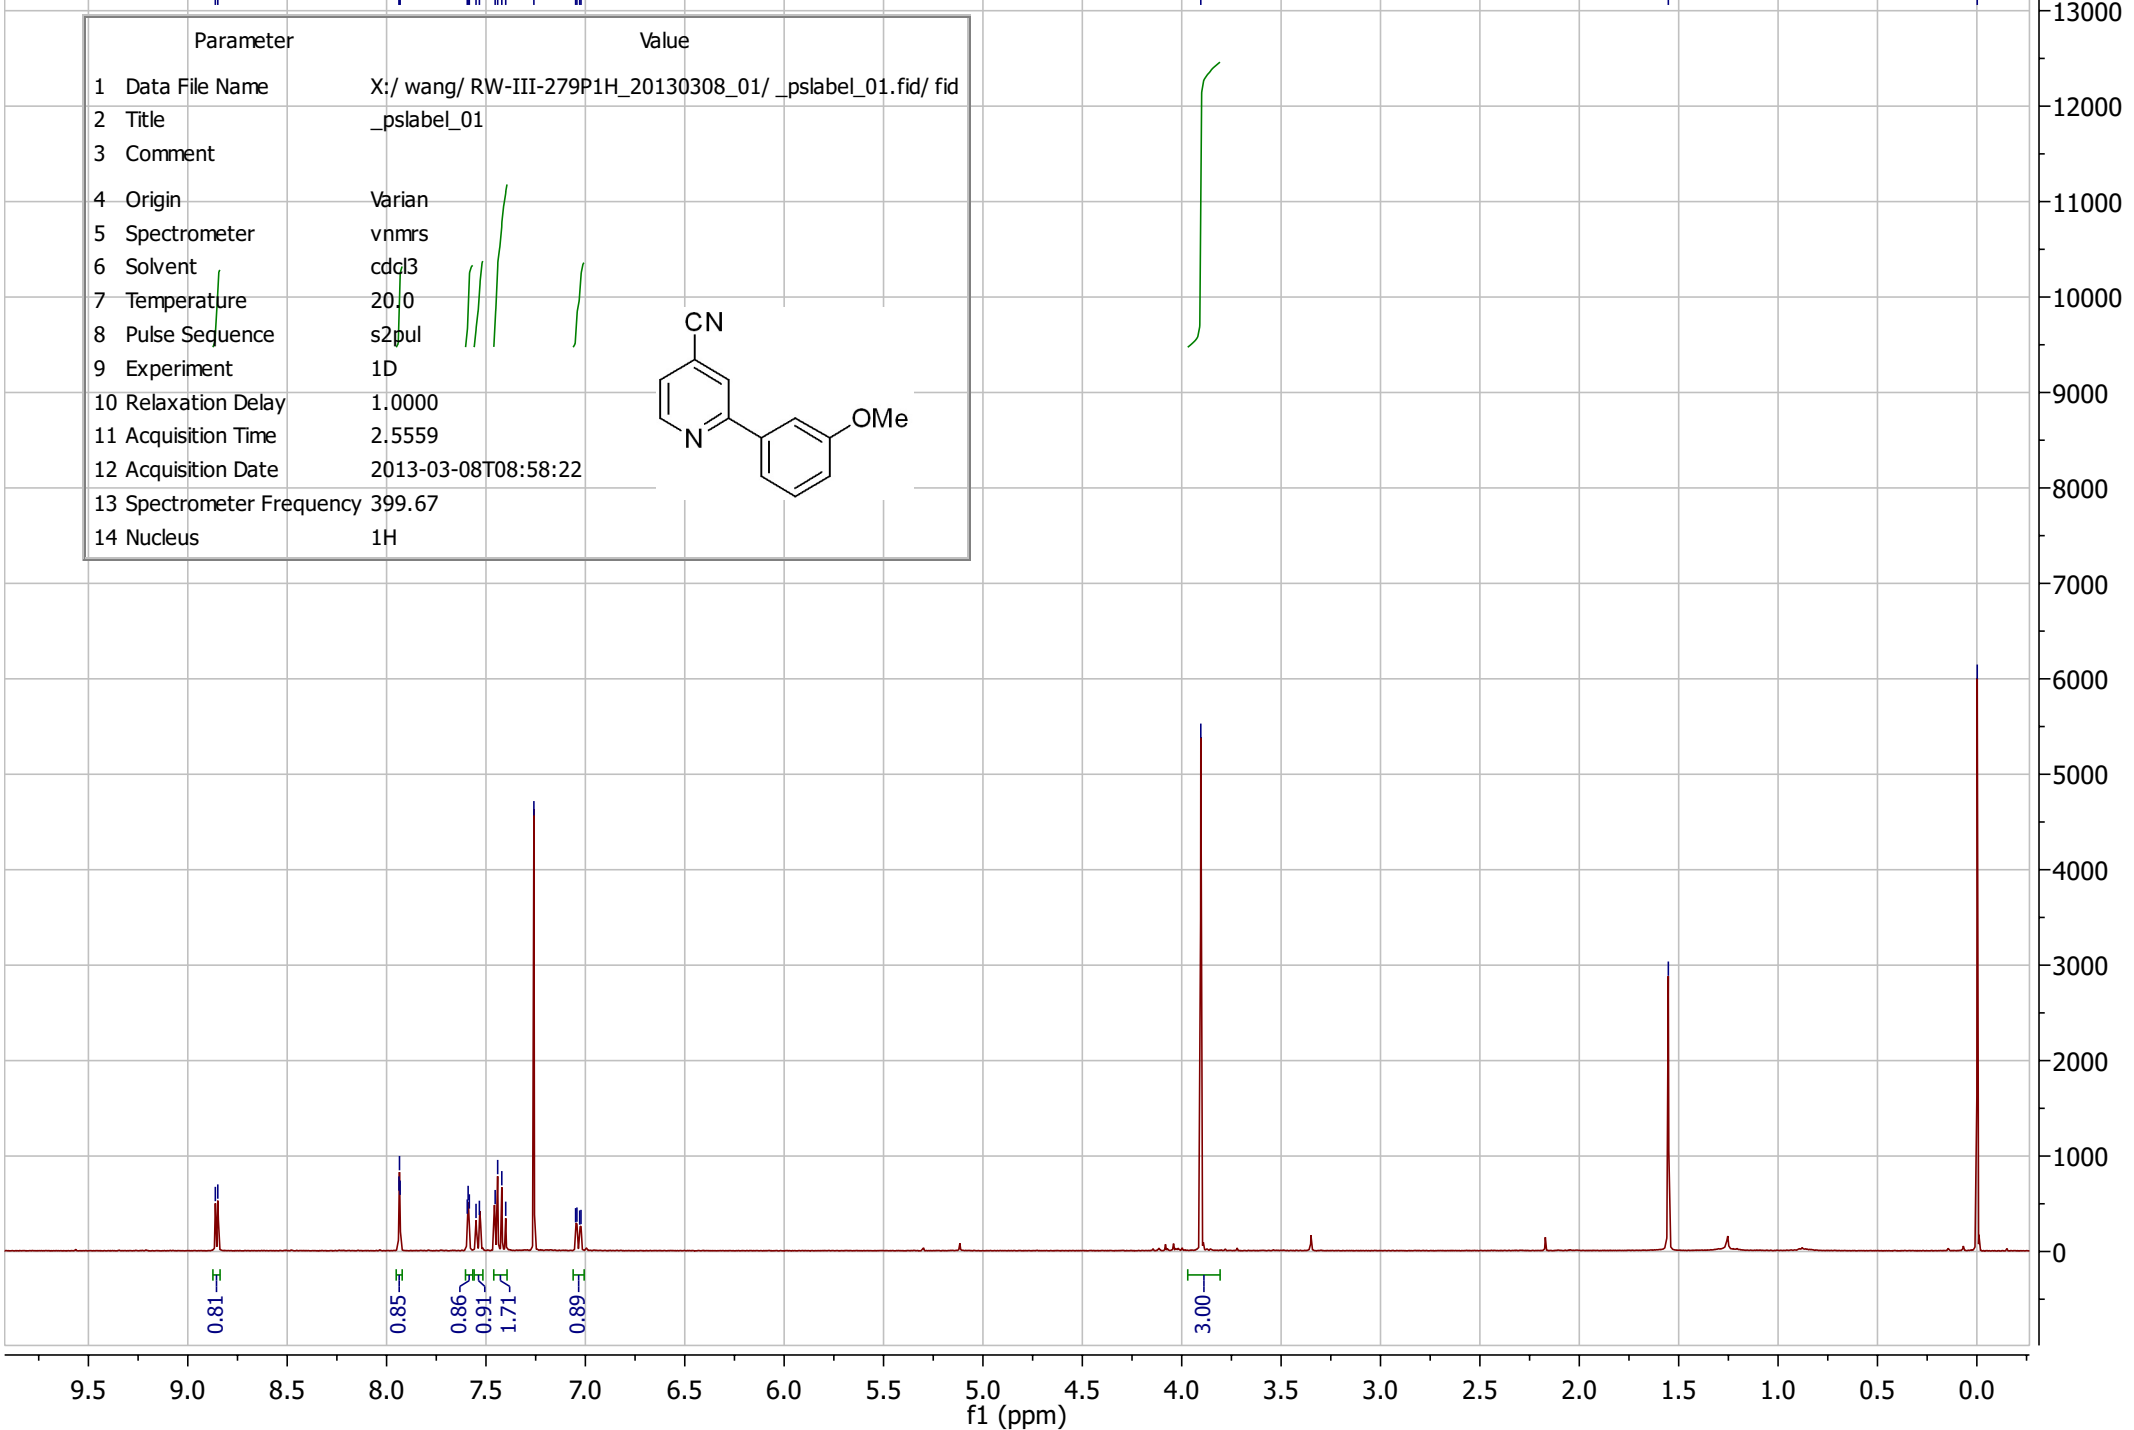

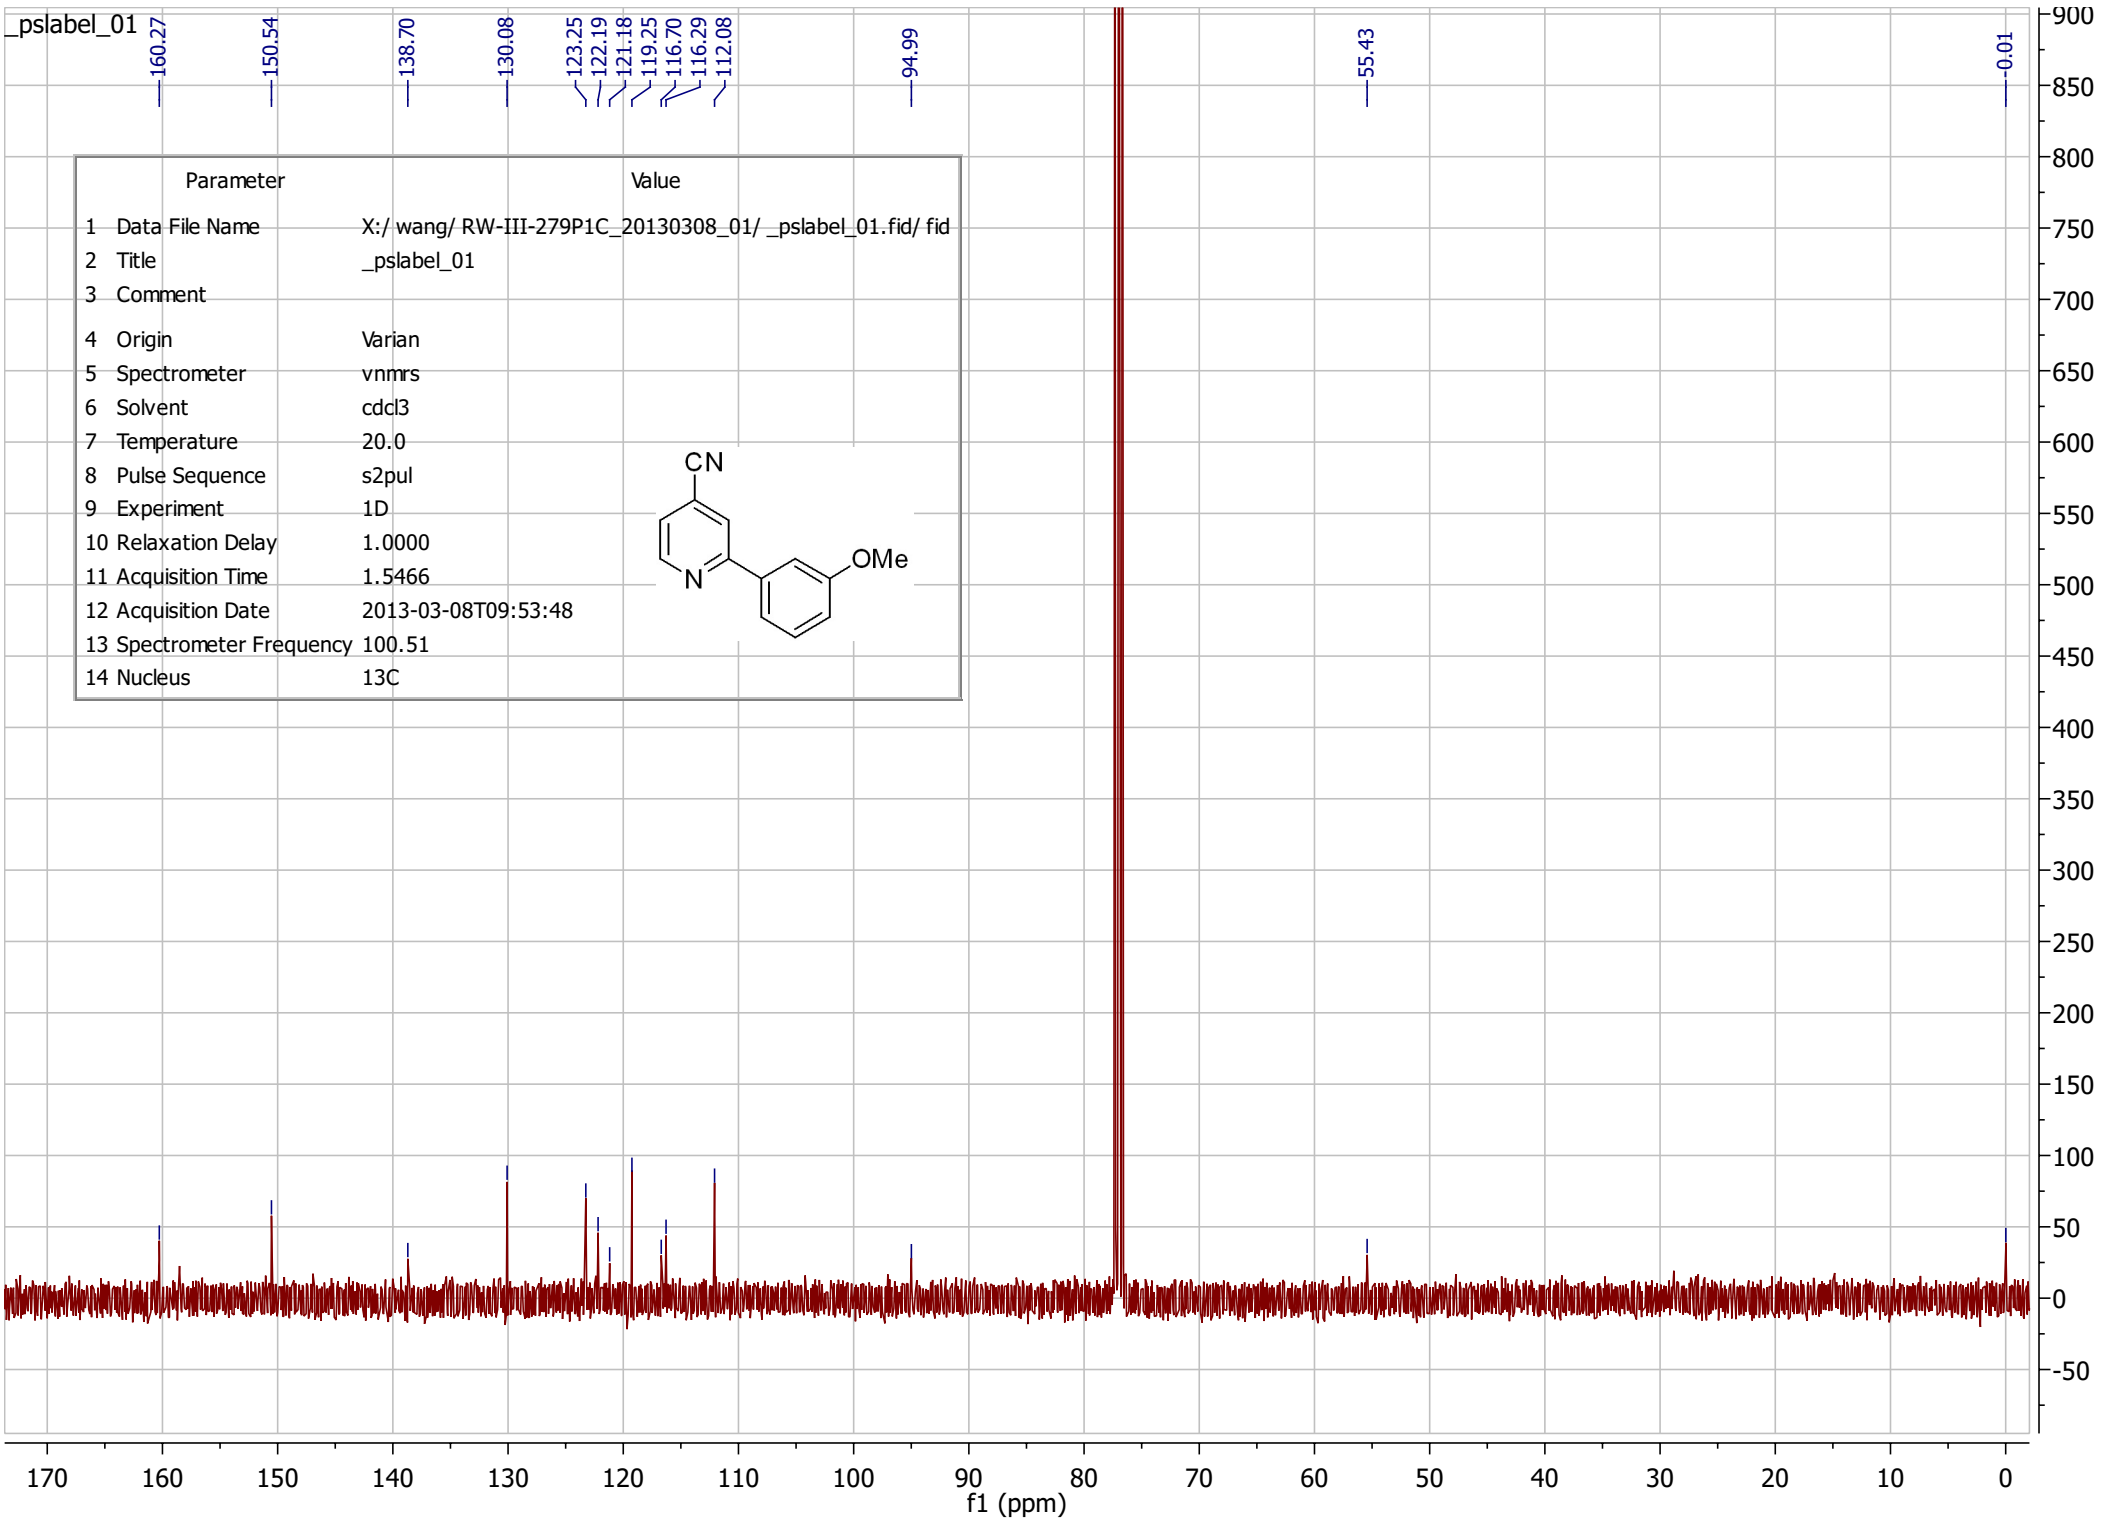

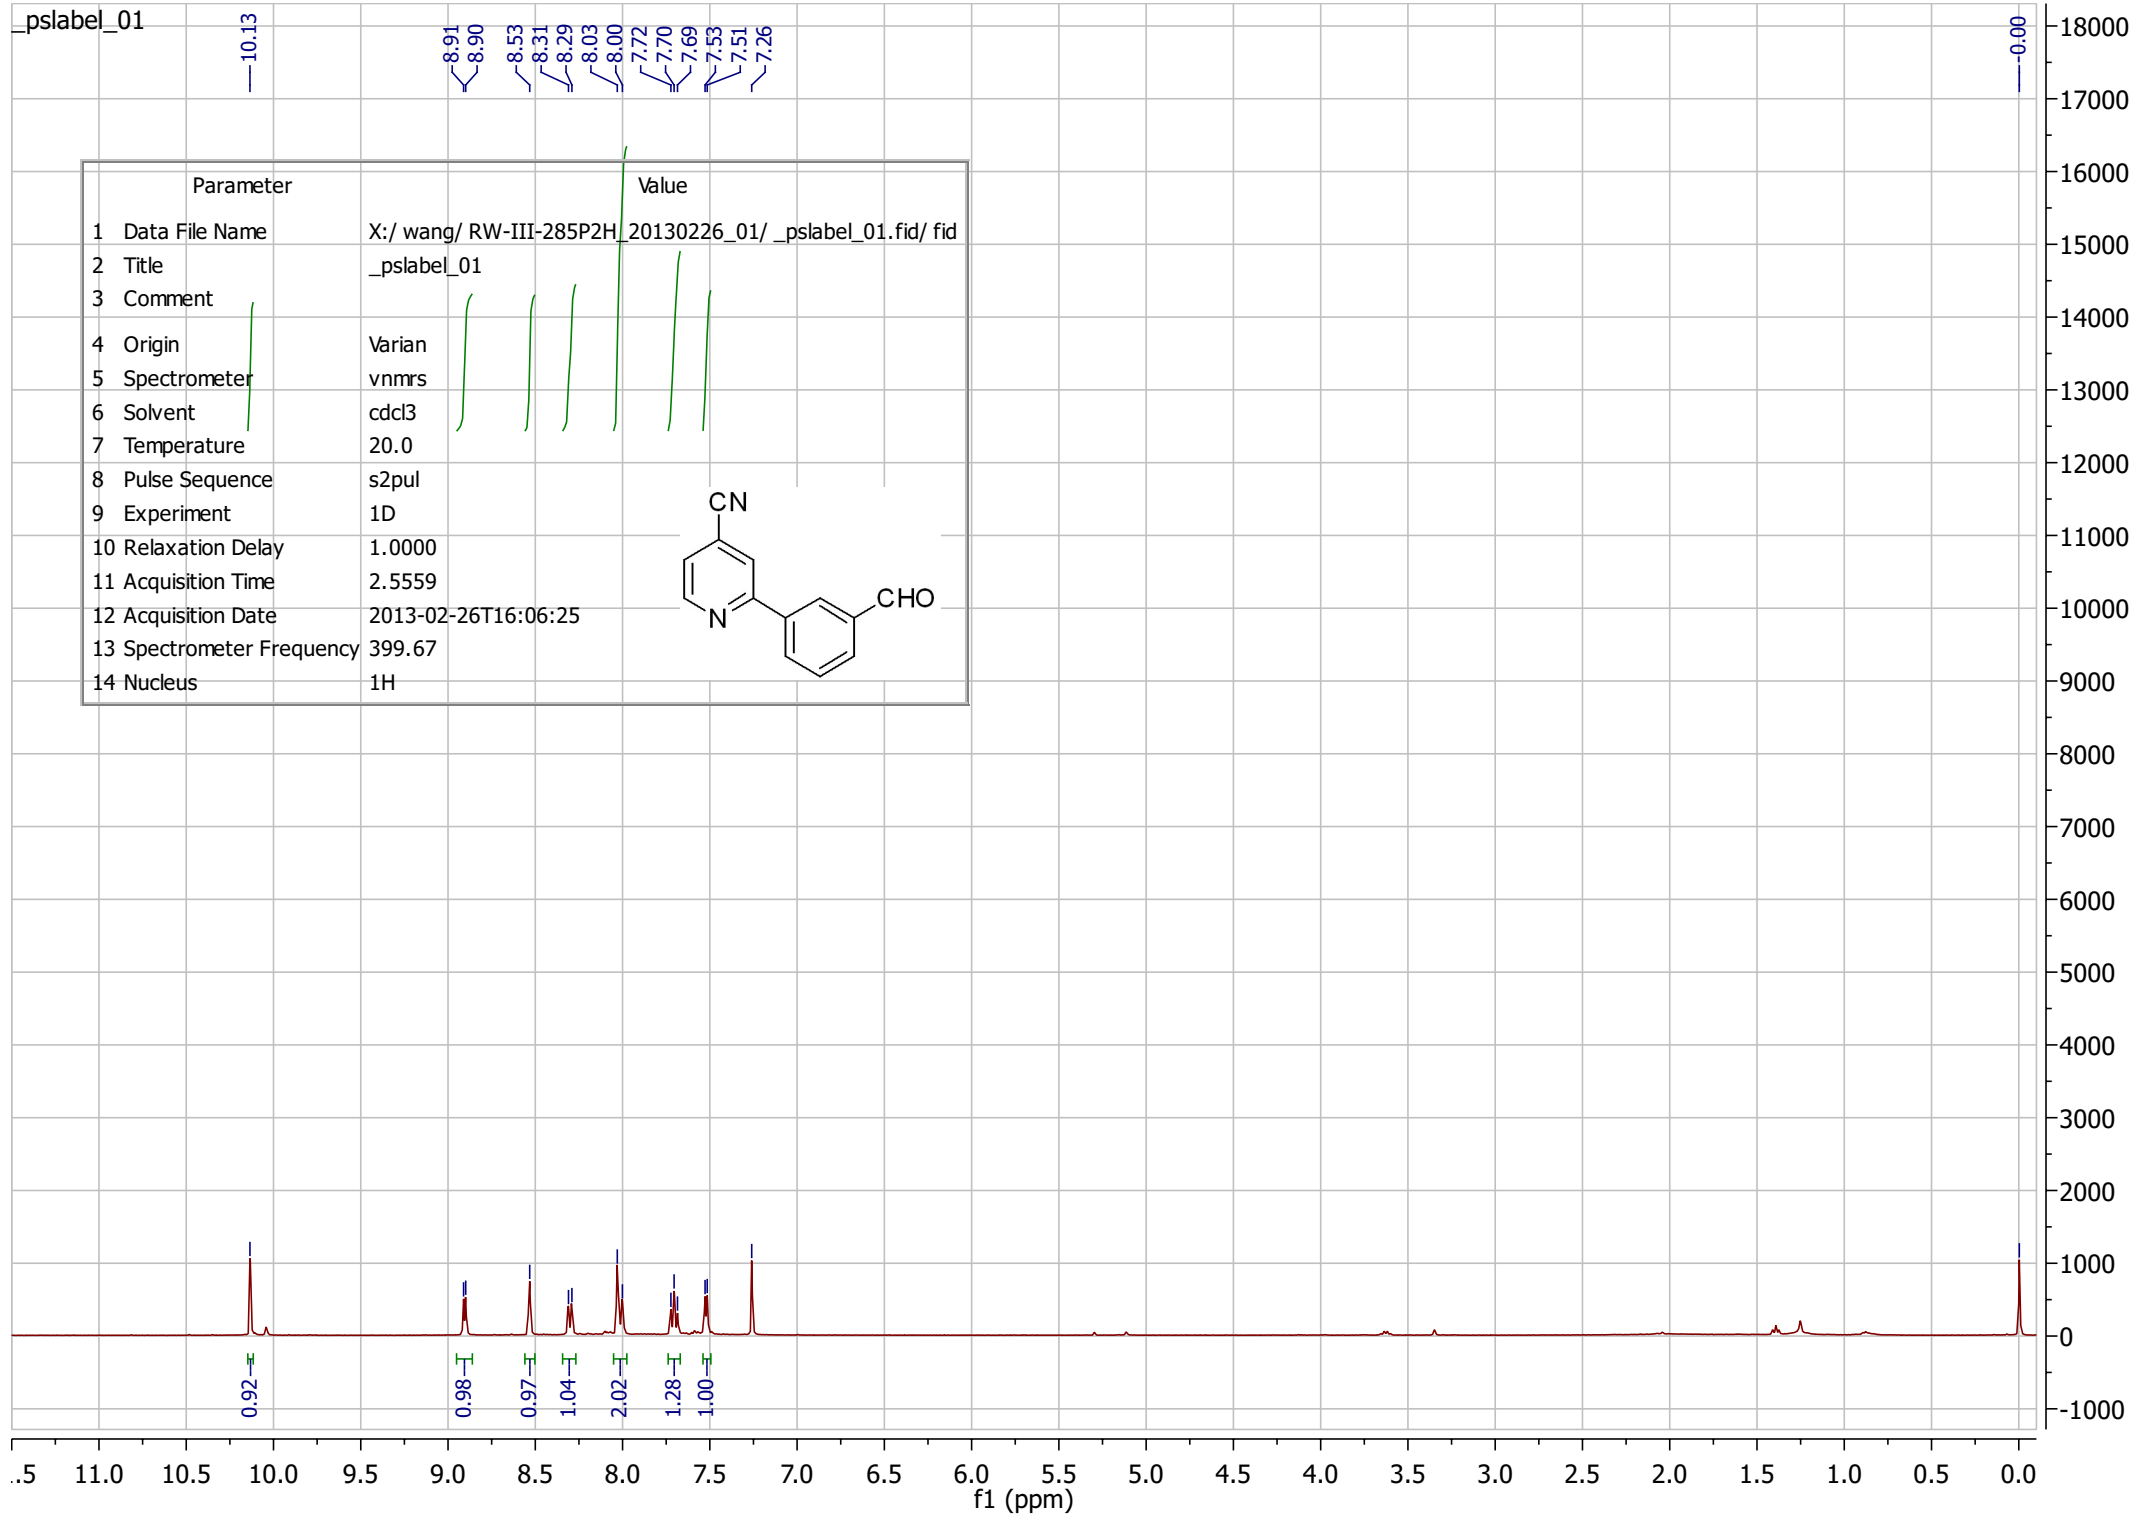

\_pslabel\_01

191.72

157.21

150.85

138.25

137.09

132.59

131.01

129.86

128.23

123.93

122.04

121.57

116.41

77.31

77.00

76.68

| Parameter                 | Value                                                    |
|---------------------------|----------------------------------------------------------|
| 1 Data File Name          | X:/ wang/ RW-III-285P2C_20130226_01/_pslabel_01.fid/ fid |
| 2 Title                   | _pslabel_01                                              |
| 3 Comment                 |                                                          |
| 4 Origin                  | Varian                                                   |
| 5 Spectrometer            | vnmrs                                                    |
| 6 Solvent                 | cdcl3                                                    |
| 7 Temperature             | 20.0                                                     |
| 8 Pulse Sequence          | s2pul                                                    |
| 9 Experiment              | 1D                                                       |
| 10 Relaxation Delay       | 1.0000                                                   |
| 11 Acquisition Time       | 1.2845                                                   |
| 12 Acquisition Date       | 2013-02-26T18:22:20                                      |
| 13 Spectrometer Frequency | 100.51                                                   |
| 14 Nucleus                | 13C                                                      |

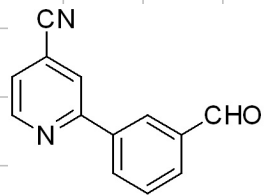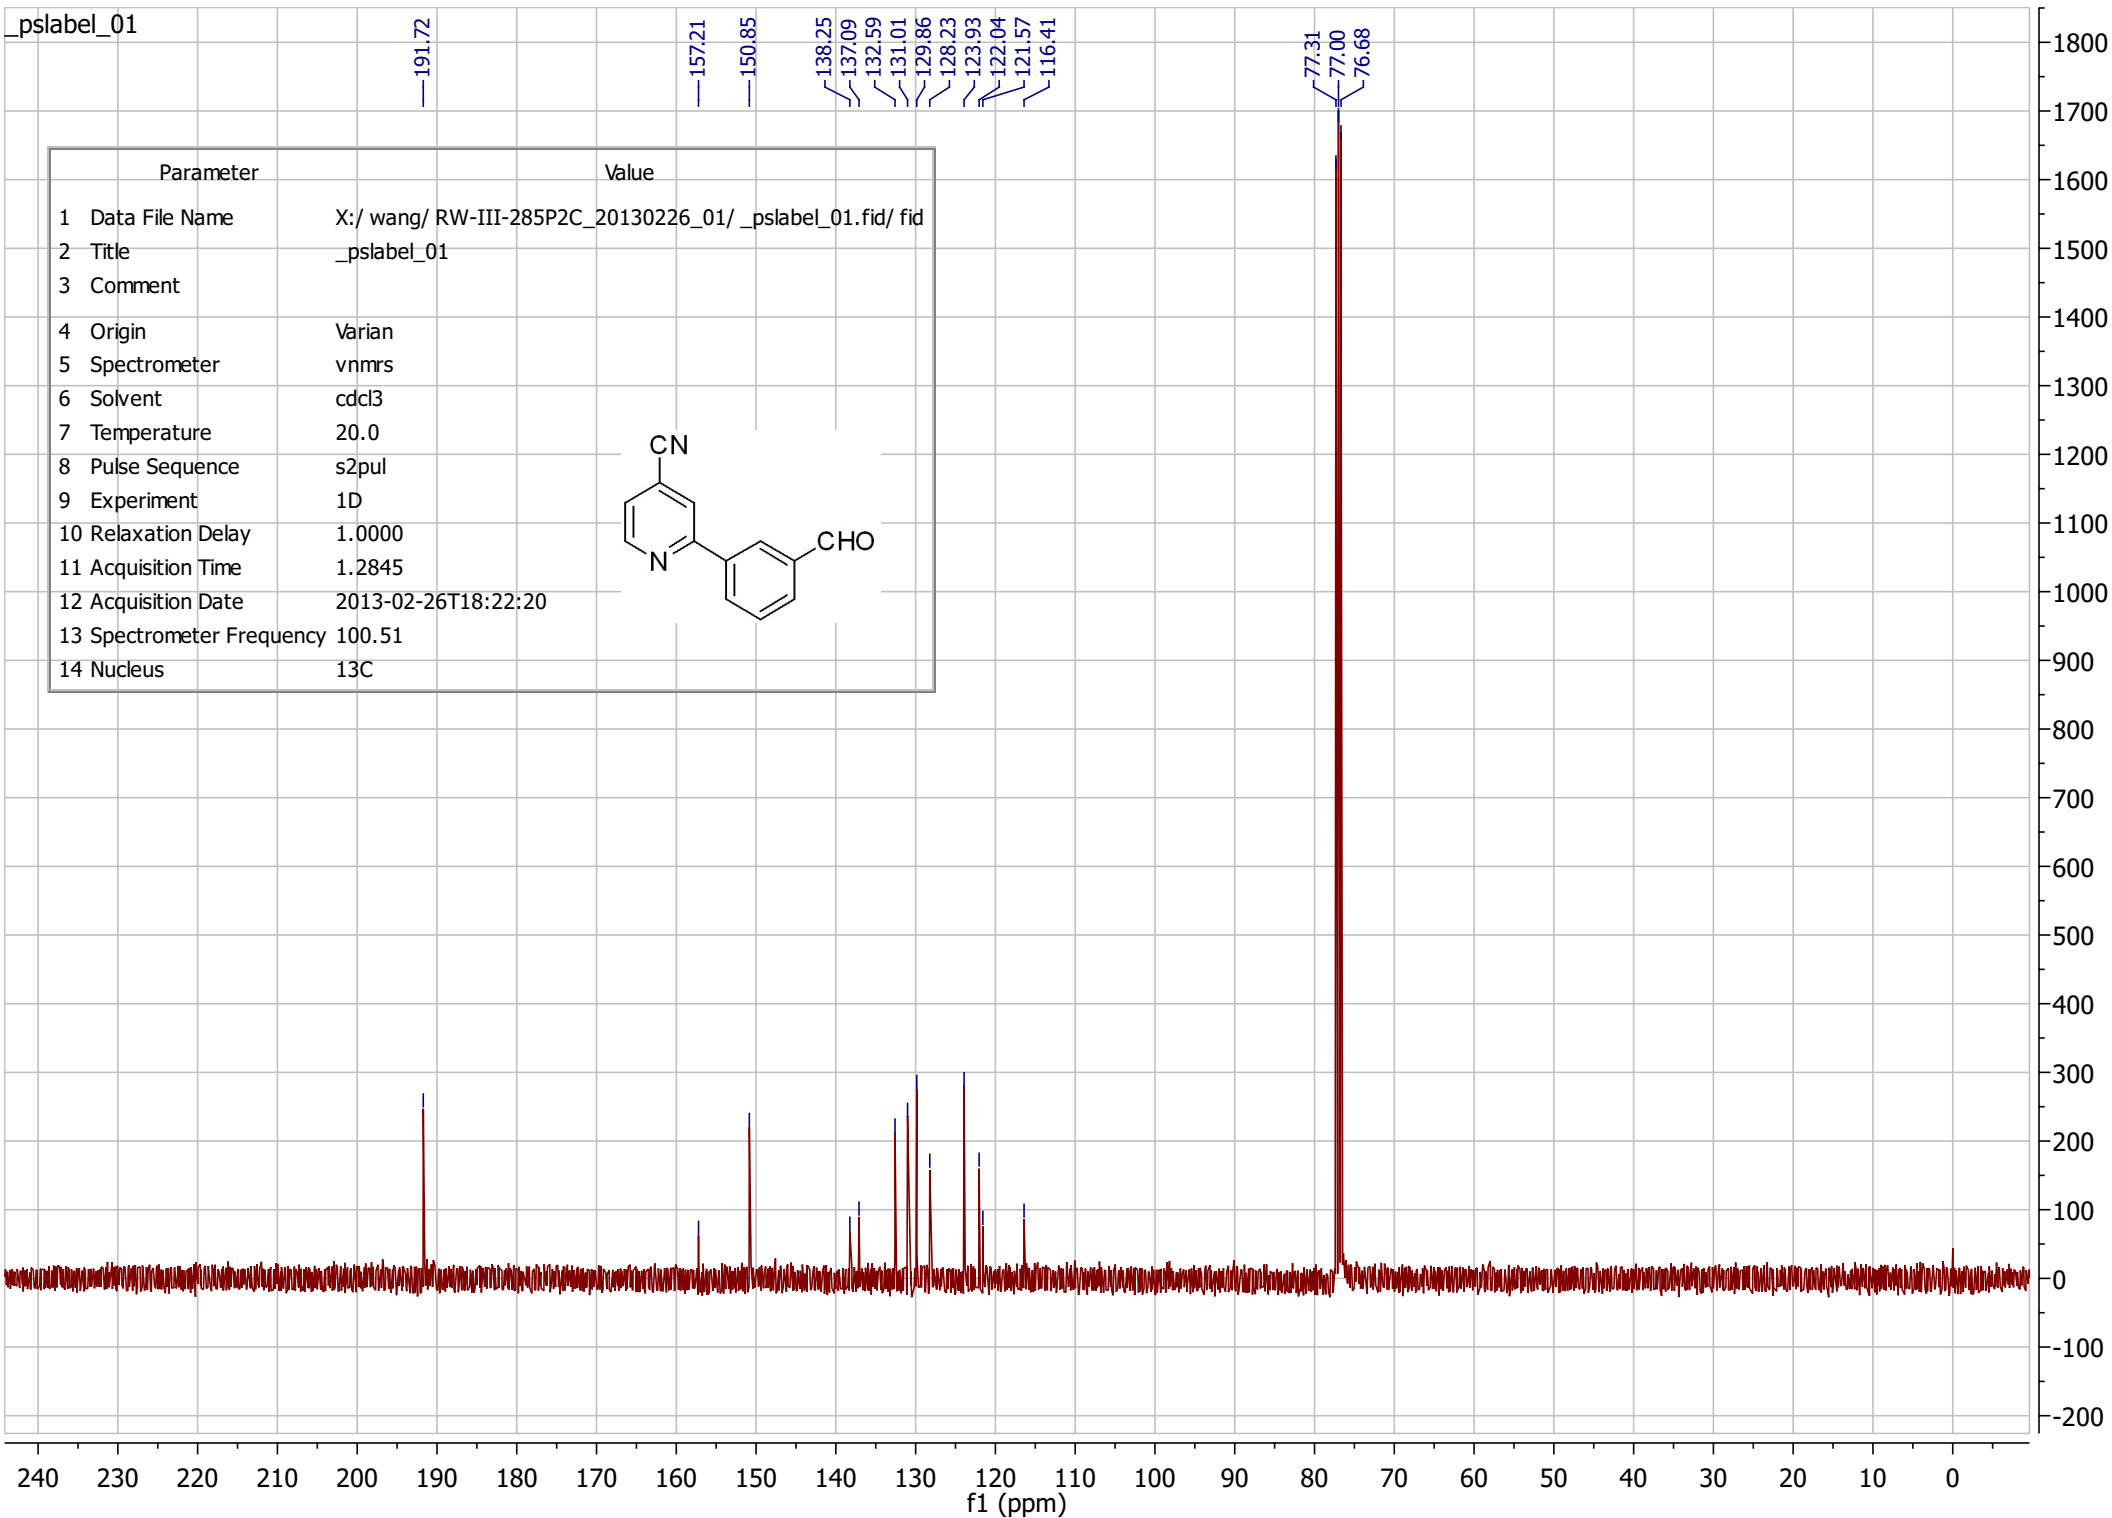

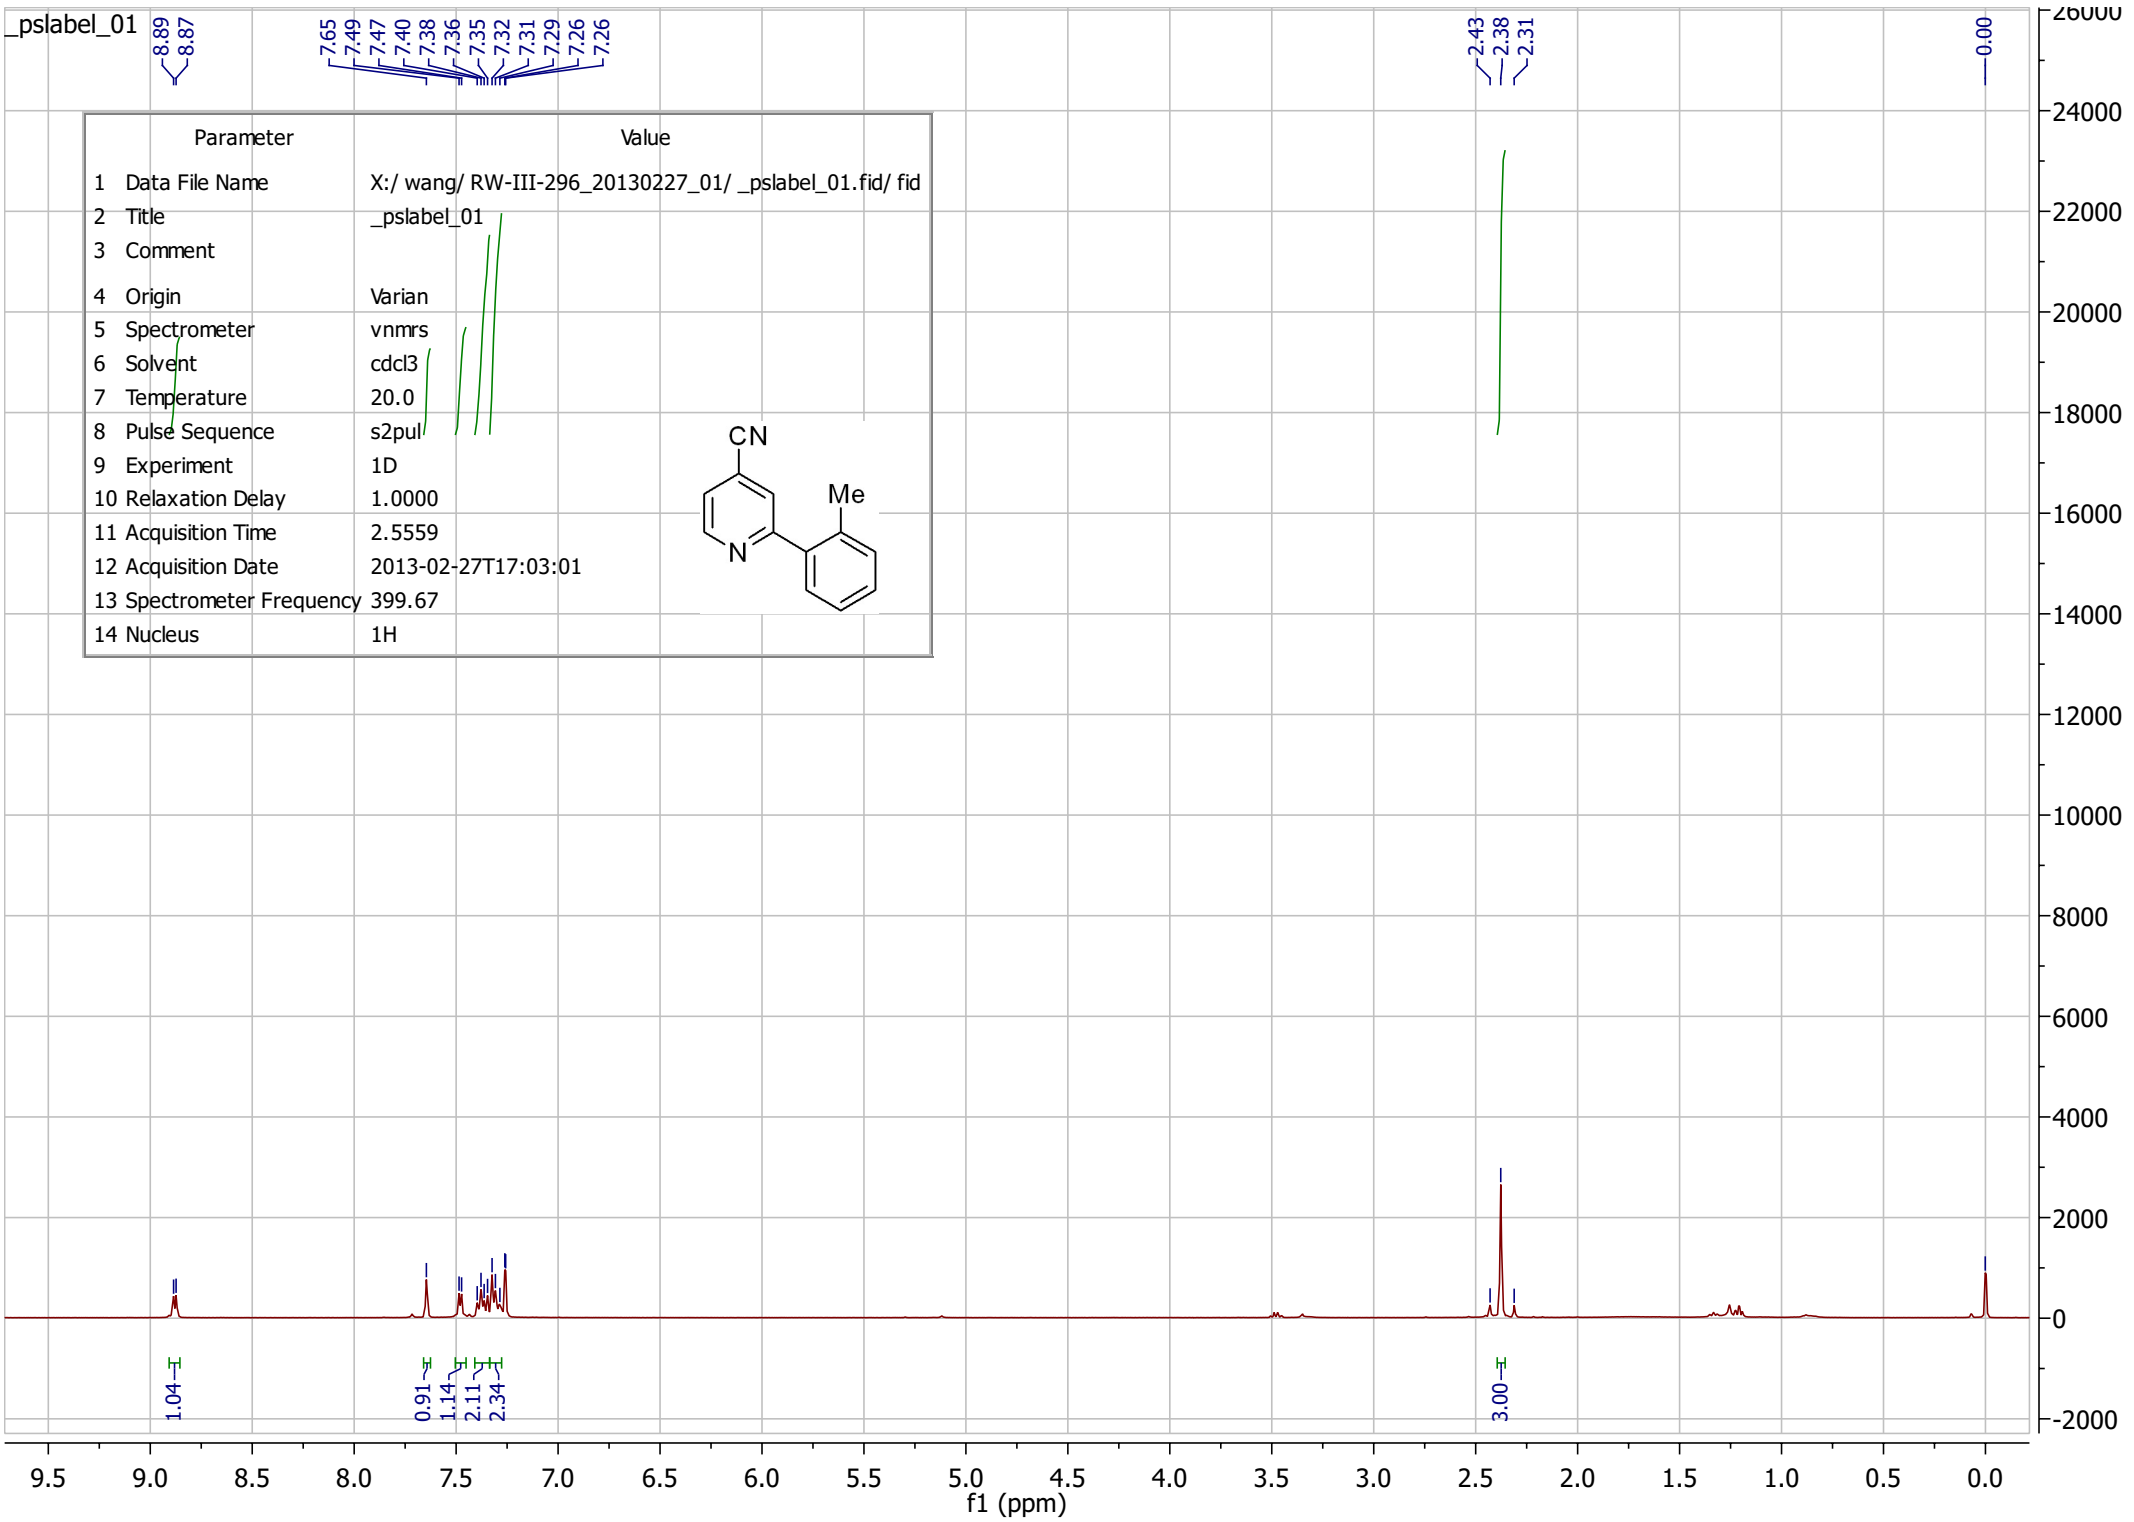

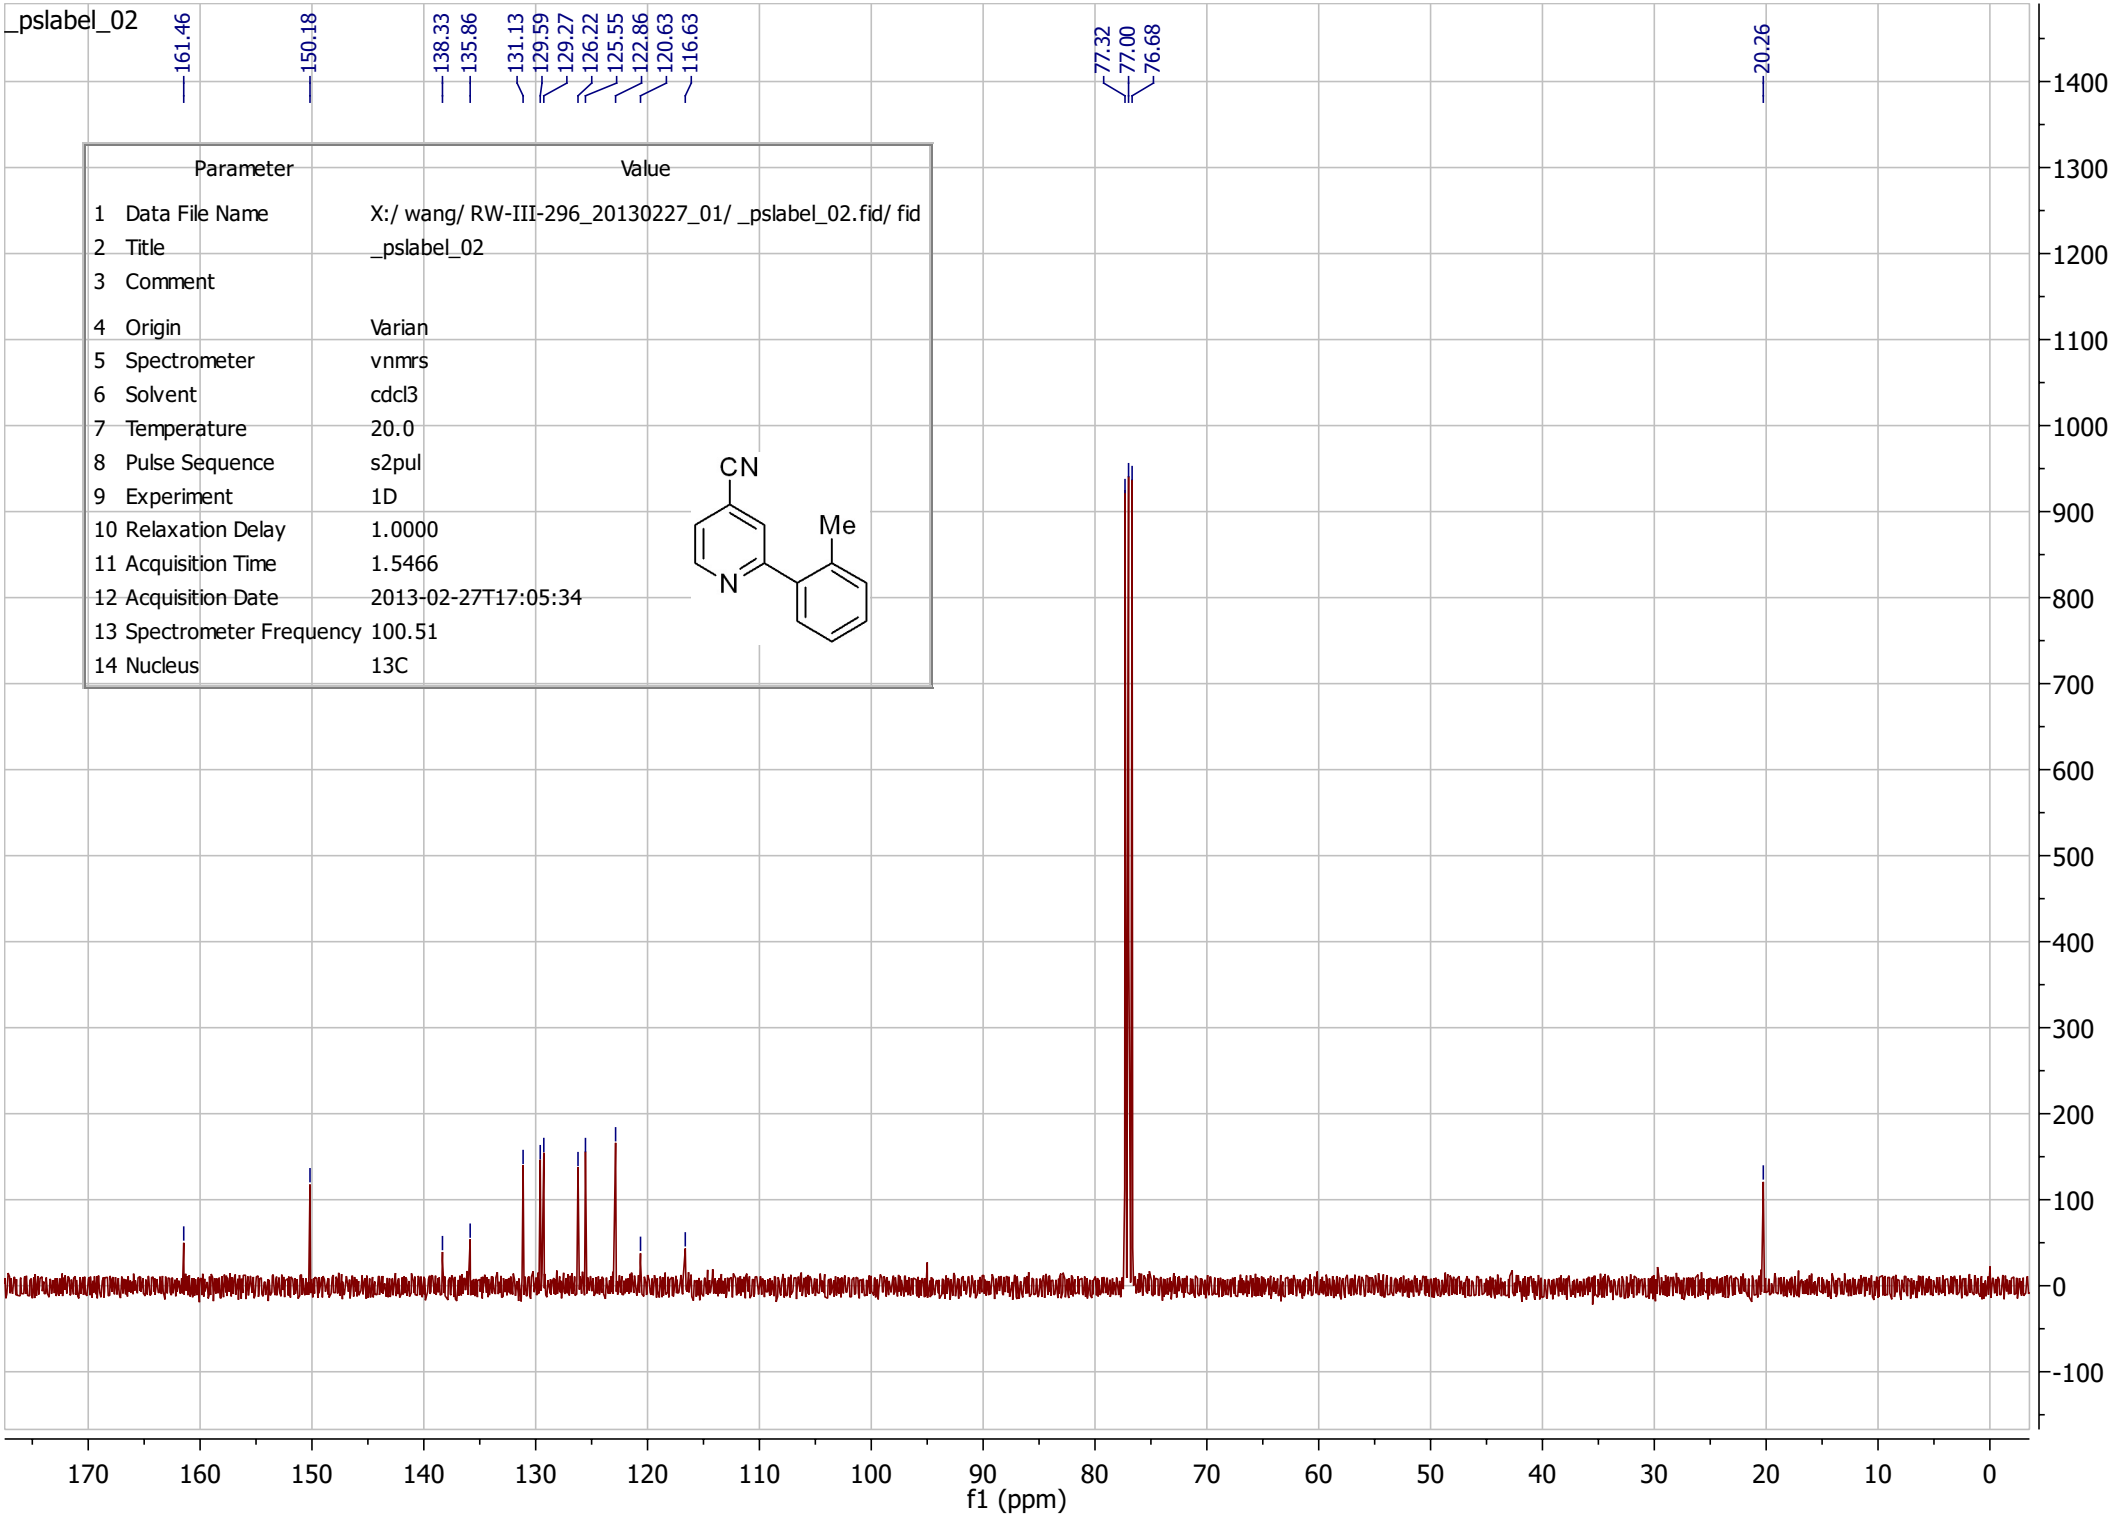



8.90  
8.89

7.88

7.59

7.47

7.45

7.43

7.34

7.32

7.30

6.01

5.38

1.56

0.00

| Parameter                 | Value               |
|---------------------------|---------------------|
| 1 Data File Name          | Z:/ wang/ RW-IV-2   |
| 2 Title                   |                     |
| 3 Origin                  | vnmrs               |
| 4 Owner                   |                     |
| 5 Solvent                 | cdcl3               |
| 6 Pulse Sequence          | s2pul               |
| 7 Acquisition Date        | 2013-03-04T17:08:12 |
| 8 Modification Date       |                     |
| 9 Temperature             | 20.0                |
| 10 Number of Scans        | 34                  |
| 11 Spectrometer Frequency | 399.67              |
| 12 Spectral Width         | 6410.3              |
| 13 Lowest Frequency       | -807.1              |
| 14 Nucleus                | 1H                  |
| 15 Acquired Size          | 16384               |
| 16 Spectral Size          | 32768               |

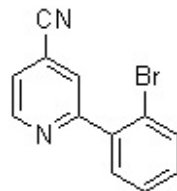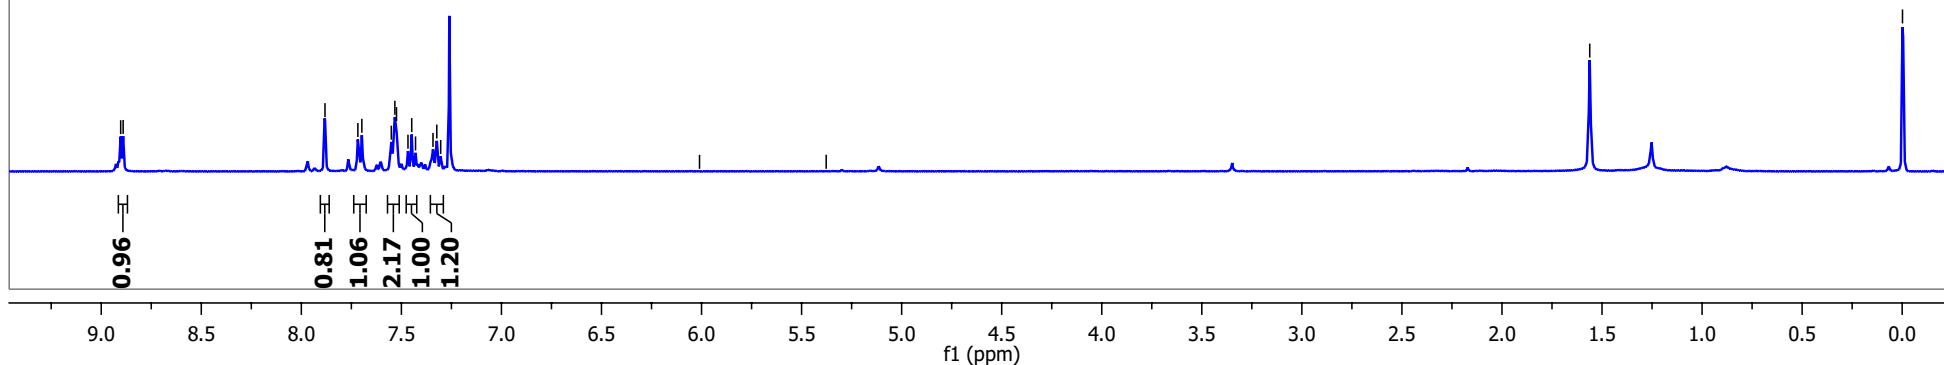

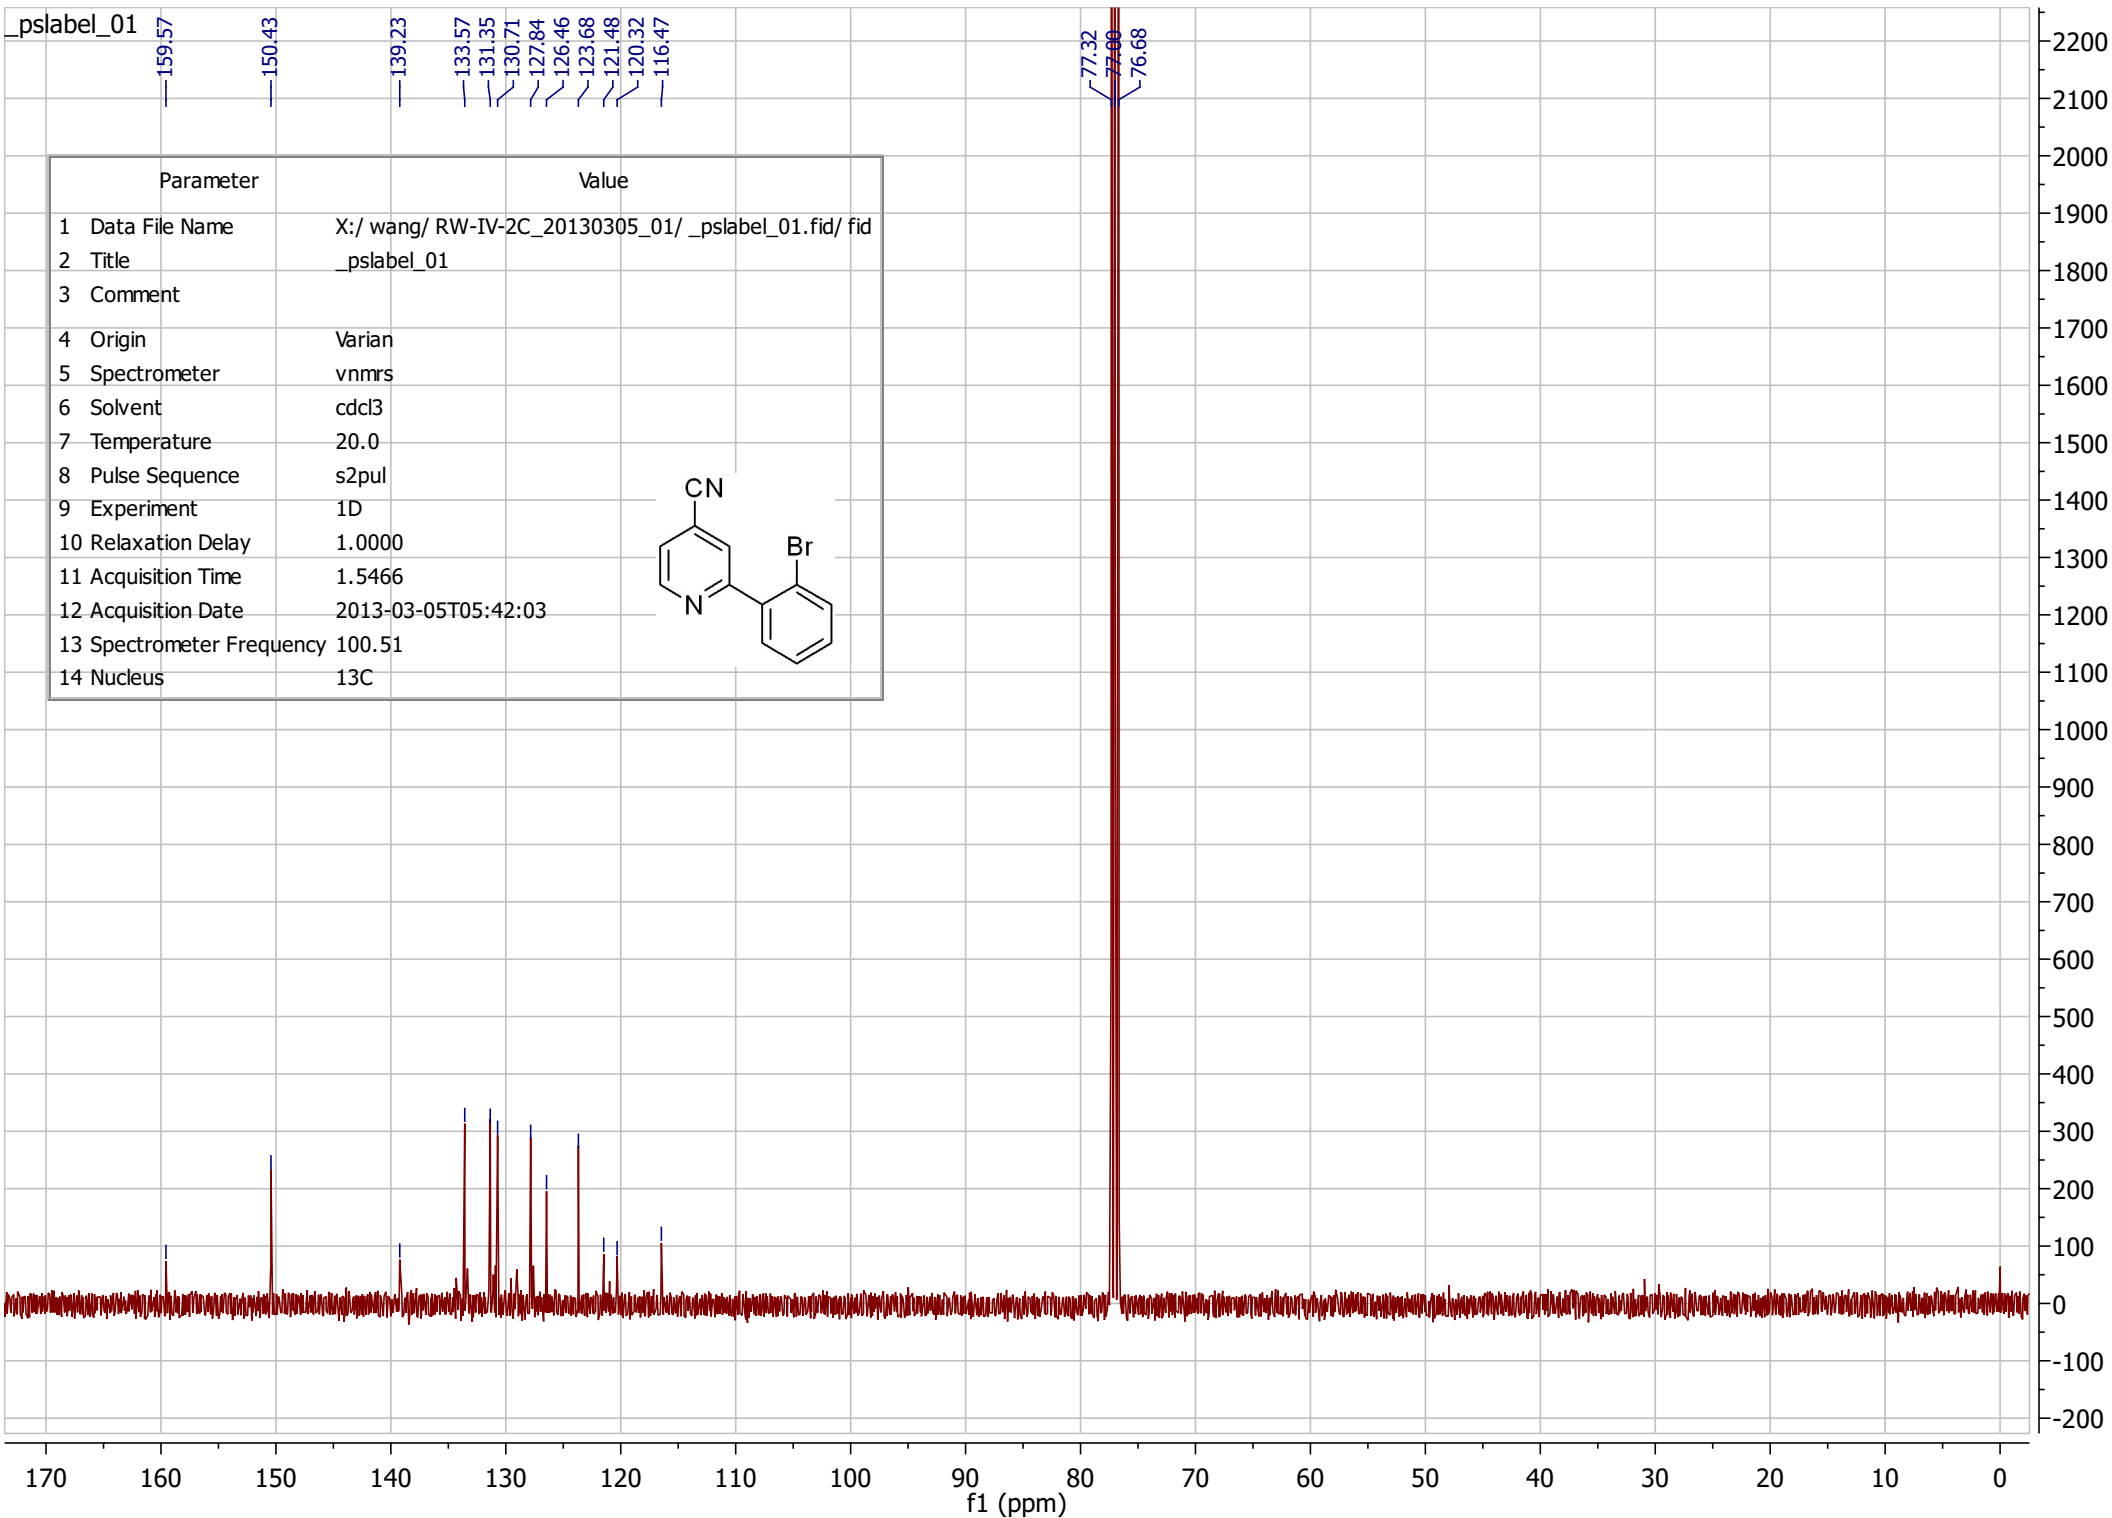

\_pslabel\_01

159.57  
150.43  
139.23  
133.57  
131.35  
130.71  
127.84  
126.46  
123.68  
121.48  
120.32  
116.47

77.32  
77.00  
76.68

| Parameter                 | Value                                                |
|---------------------------|------------------------------------------------------|
| 1 Data File Name          | X:/ wang/ RW-IV-2C_20130305_01/ _pslabel_01.fid/ fid |
| 2 Title                   | _pslabel_01                                          |
| 3 Comment                 |                                                      |
| 4 Origin                  | Varian                                               |
| 5 Spectrometer            | vnmrs                                                |
| 6 Solvent                 | cdcl3                                                |
| 7 Temperature             | 20.0                                                 |
| 8 Pulse Sequence          | s2pul                                                |
| 9 Experiment              | 1D                                                   |
| 10 Relaxation Delay       | 1.0000                                               |
| 11 Acquisition Time       | 1.5466                                               |
| 12 Acquisition Date       | 2013-03-05T05:42:03                                  |
| 13 Spectrometer Frequency | 100.51                                               |
| 14 Nucleus                | 13C                                                  |

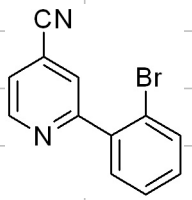

170 160 150 140 130 120 110 100 90 80 70 60 50 40 30 20 10 0

f1 (ppm)

2200  
2100  
2000  
1900  
1800  
1700  
1600  
1500  
1400  
1300  
1200  
1100  
1000  
900  
800  
700  
600  
500  
400  
300  
200  
100  
0  
-100  
-200

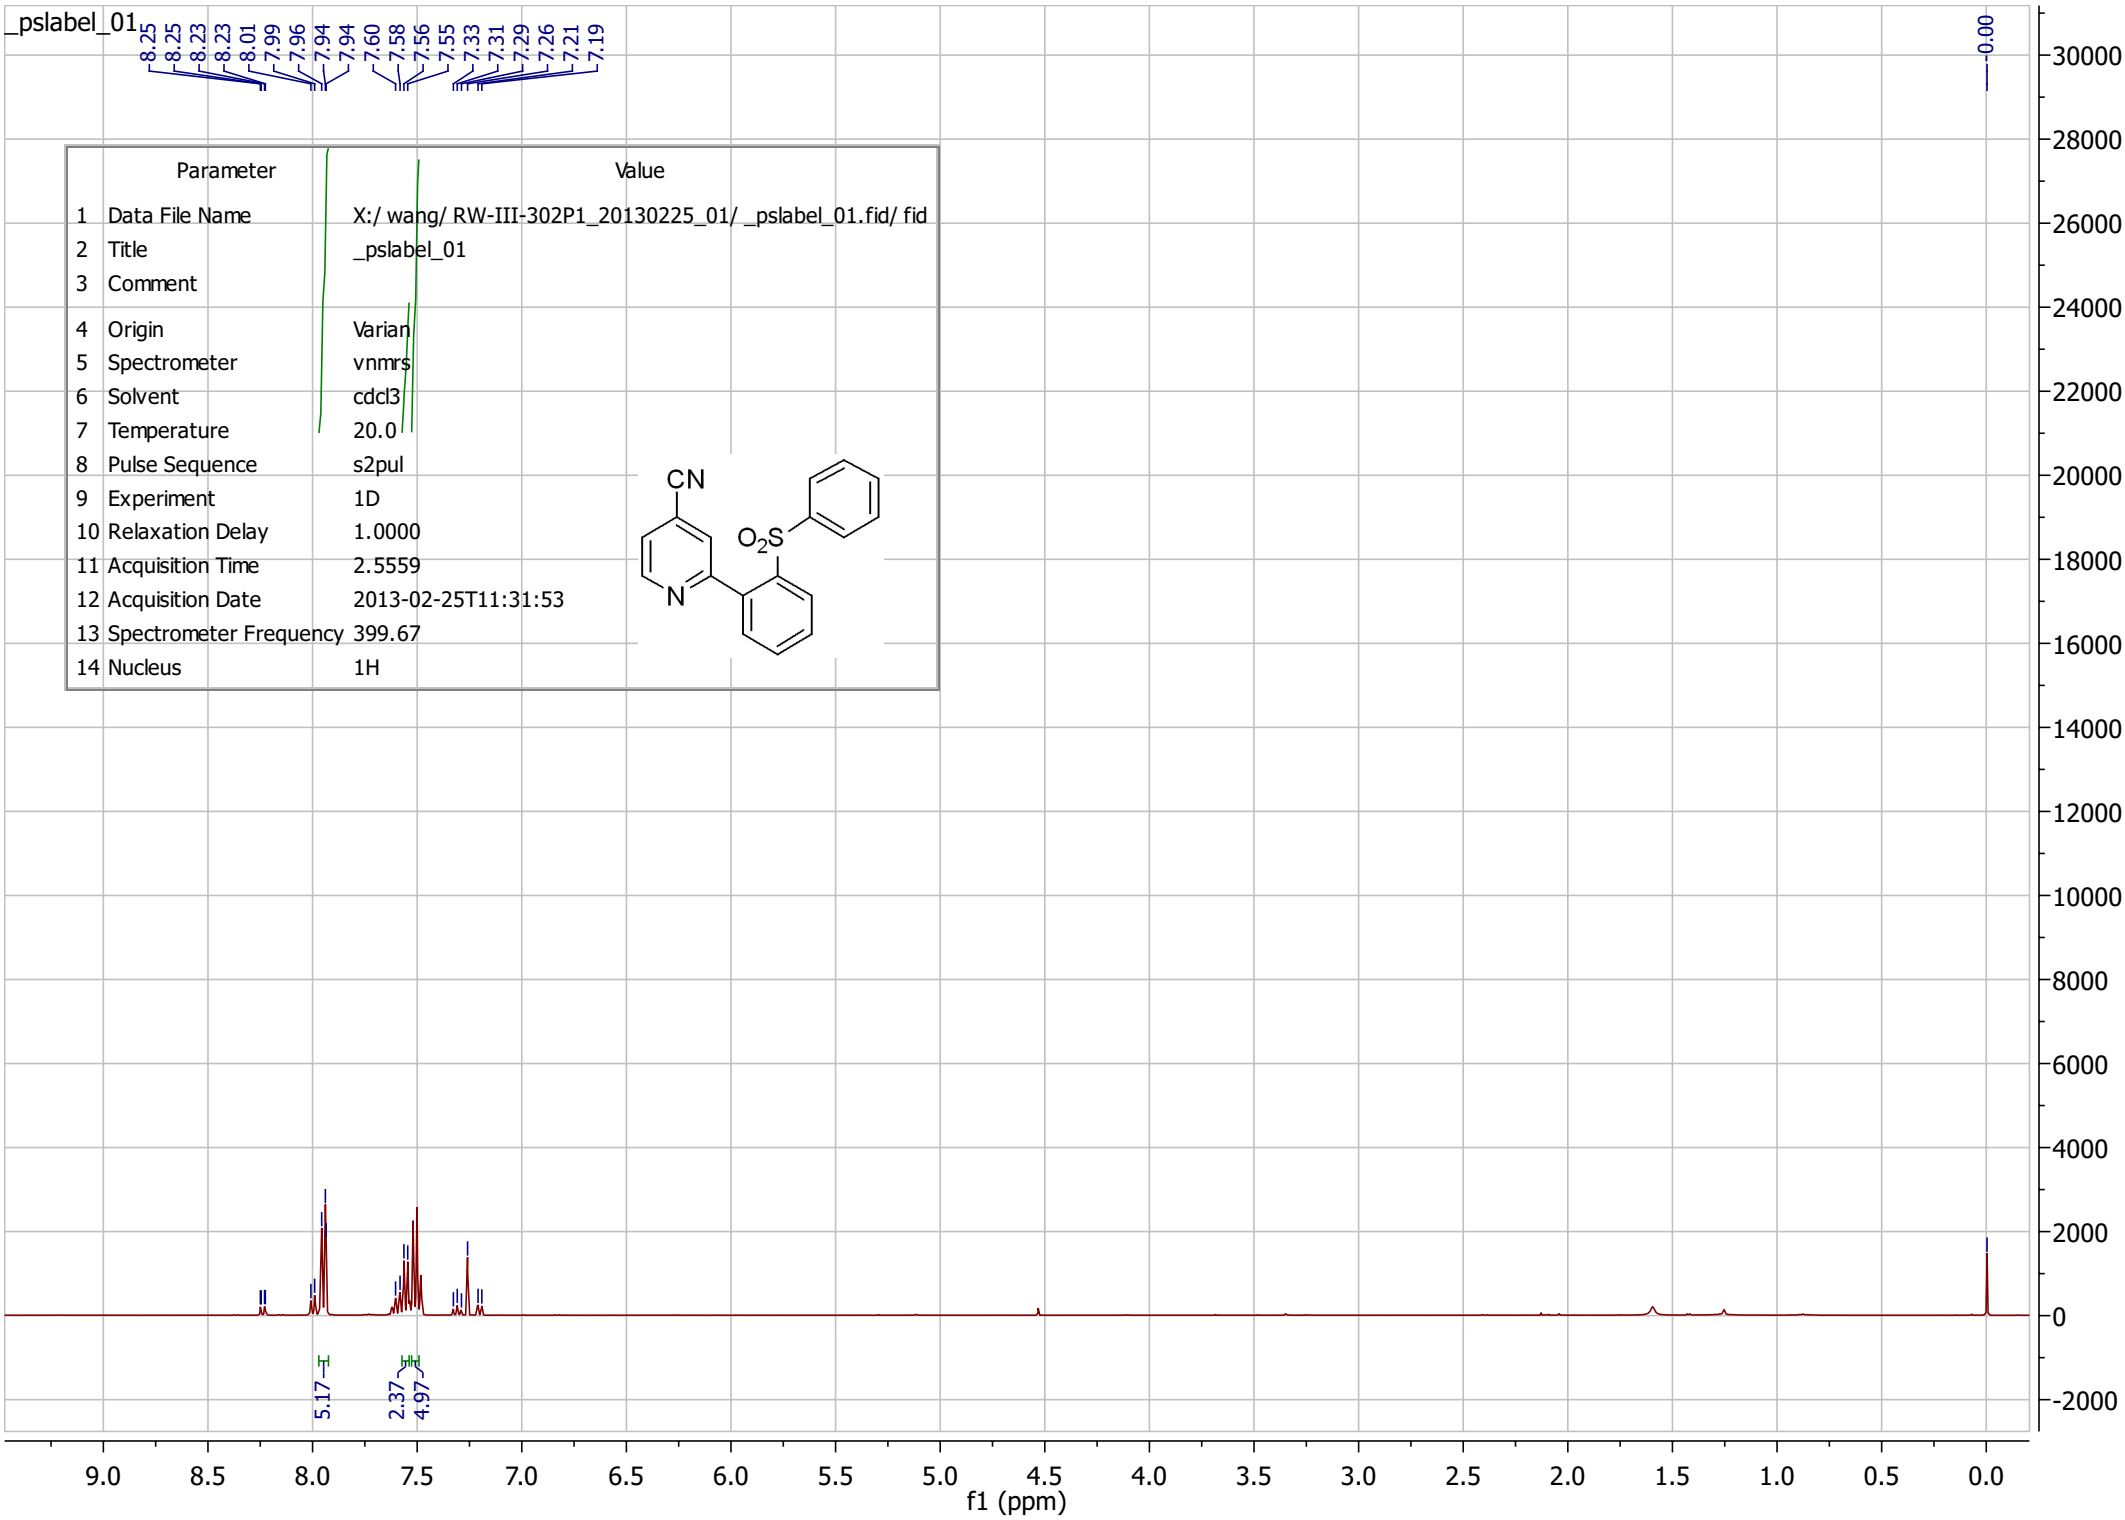

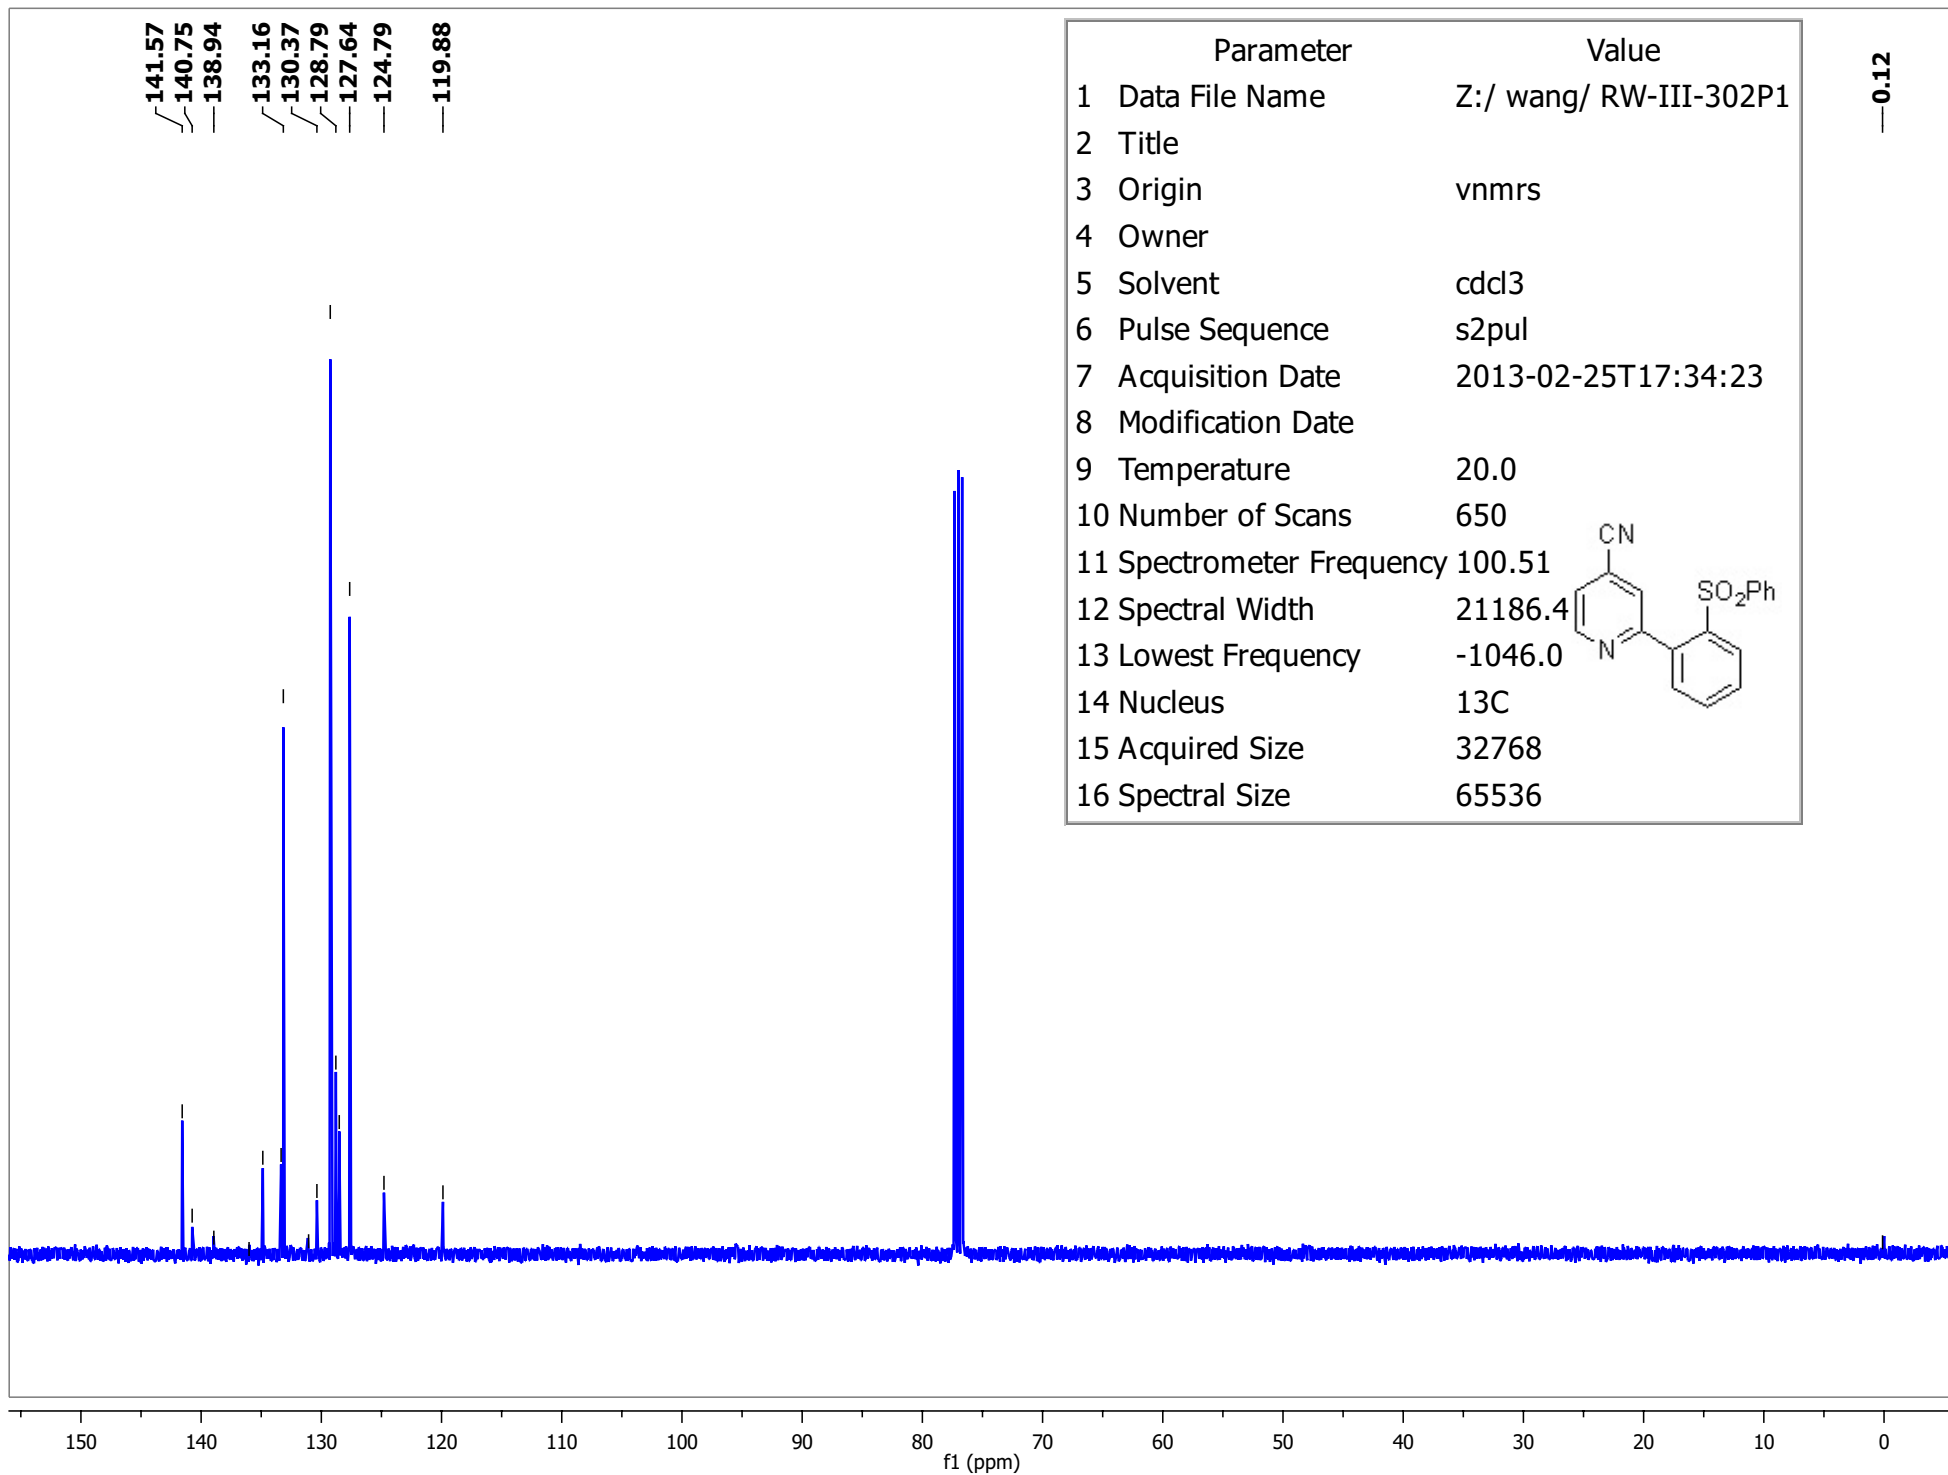

\_pslabel\_01

8.83  
8.81  
8.24  
8.17  
8.15  
7.94  
7.94  
7.93  
7.92  
7.80  
7.78  
7.78  
7.28  
7.26  
7.24  
7.23

4.00

-0.00

| Parameter                 | Value                                                    |
|---------------------------|----------------------------------------------------------|
| 1 Data File Name          | X:/ wang/ RW-III-282P1_20130222_01/ _pslabel_01.fid/ fid |
| 2 Title                   | _pslabel_01                                              |
| 3 Comment                 |                                                          |
| 4 Origin                  | Varian                                                   |
| 5 Spectrometer            | vnmr5                                                    |
| 6 Solvent                 | cdcl3                                                    |
| 7 Temperature             | 20.0                                                     |
| 8 Pulse Sequence          | s2pul                                                    |
| 9 Experiment              | 1D                                                       |
| 10 Relaxation Delay       | 1.0000                                                   |
| 11 Acquisition Time       | 2.5559                                                   |
| 12 Acquisition Date       | 2013-02-22T06:22:31                                      |
| 13 Spectrometer Frequency | 399.67                                                   |
| 14 Nucleus                | 1H                                                       |

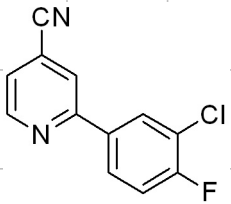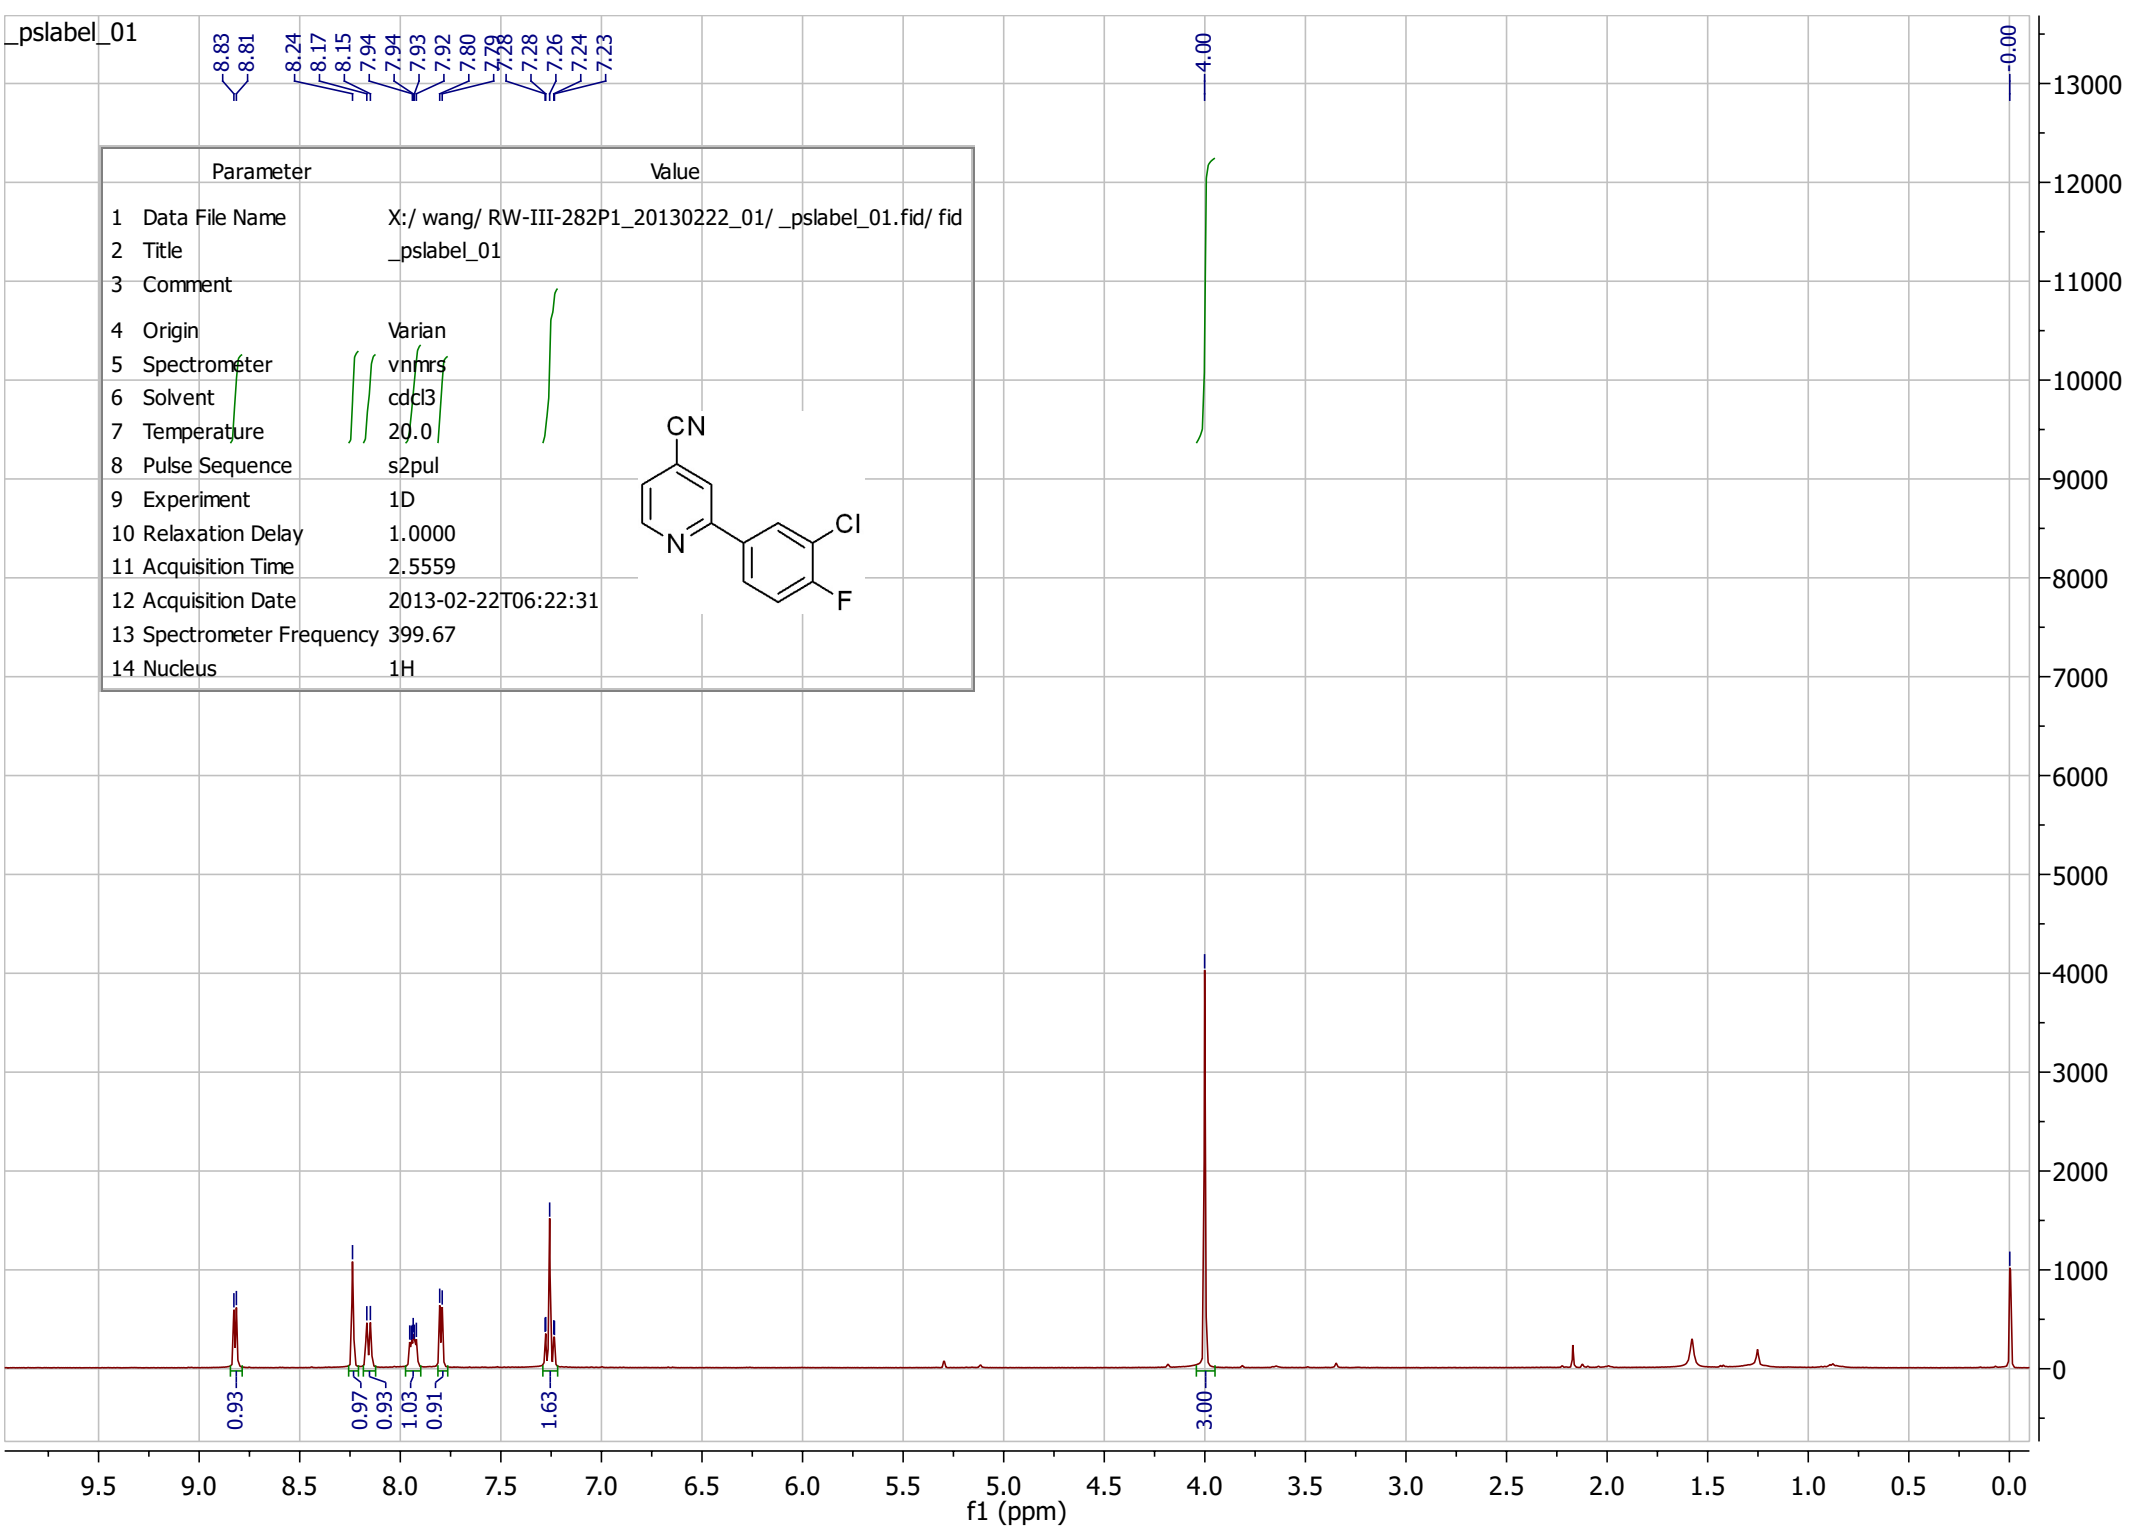

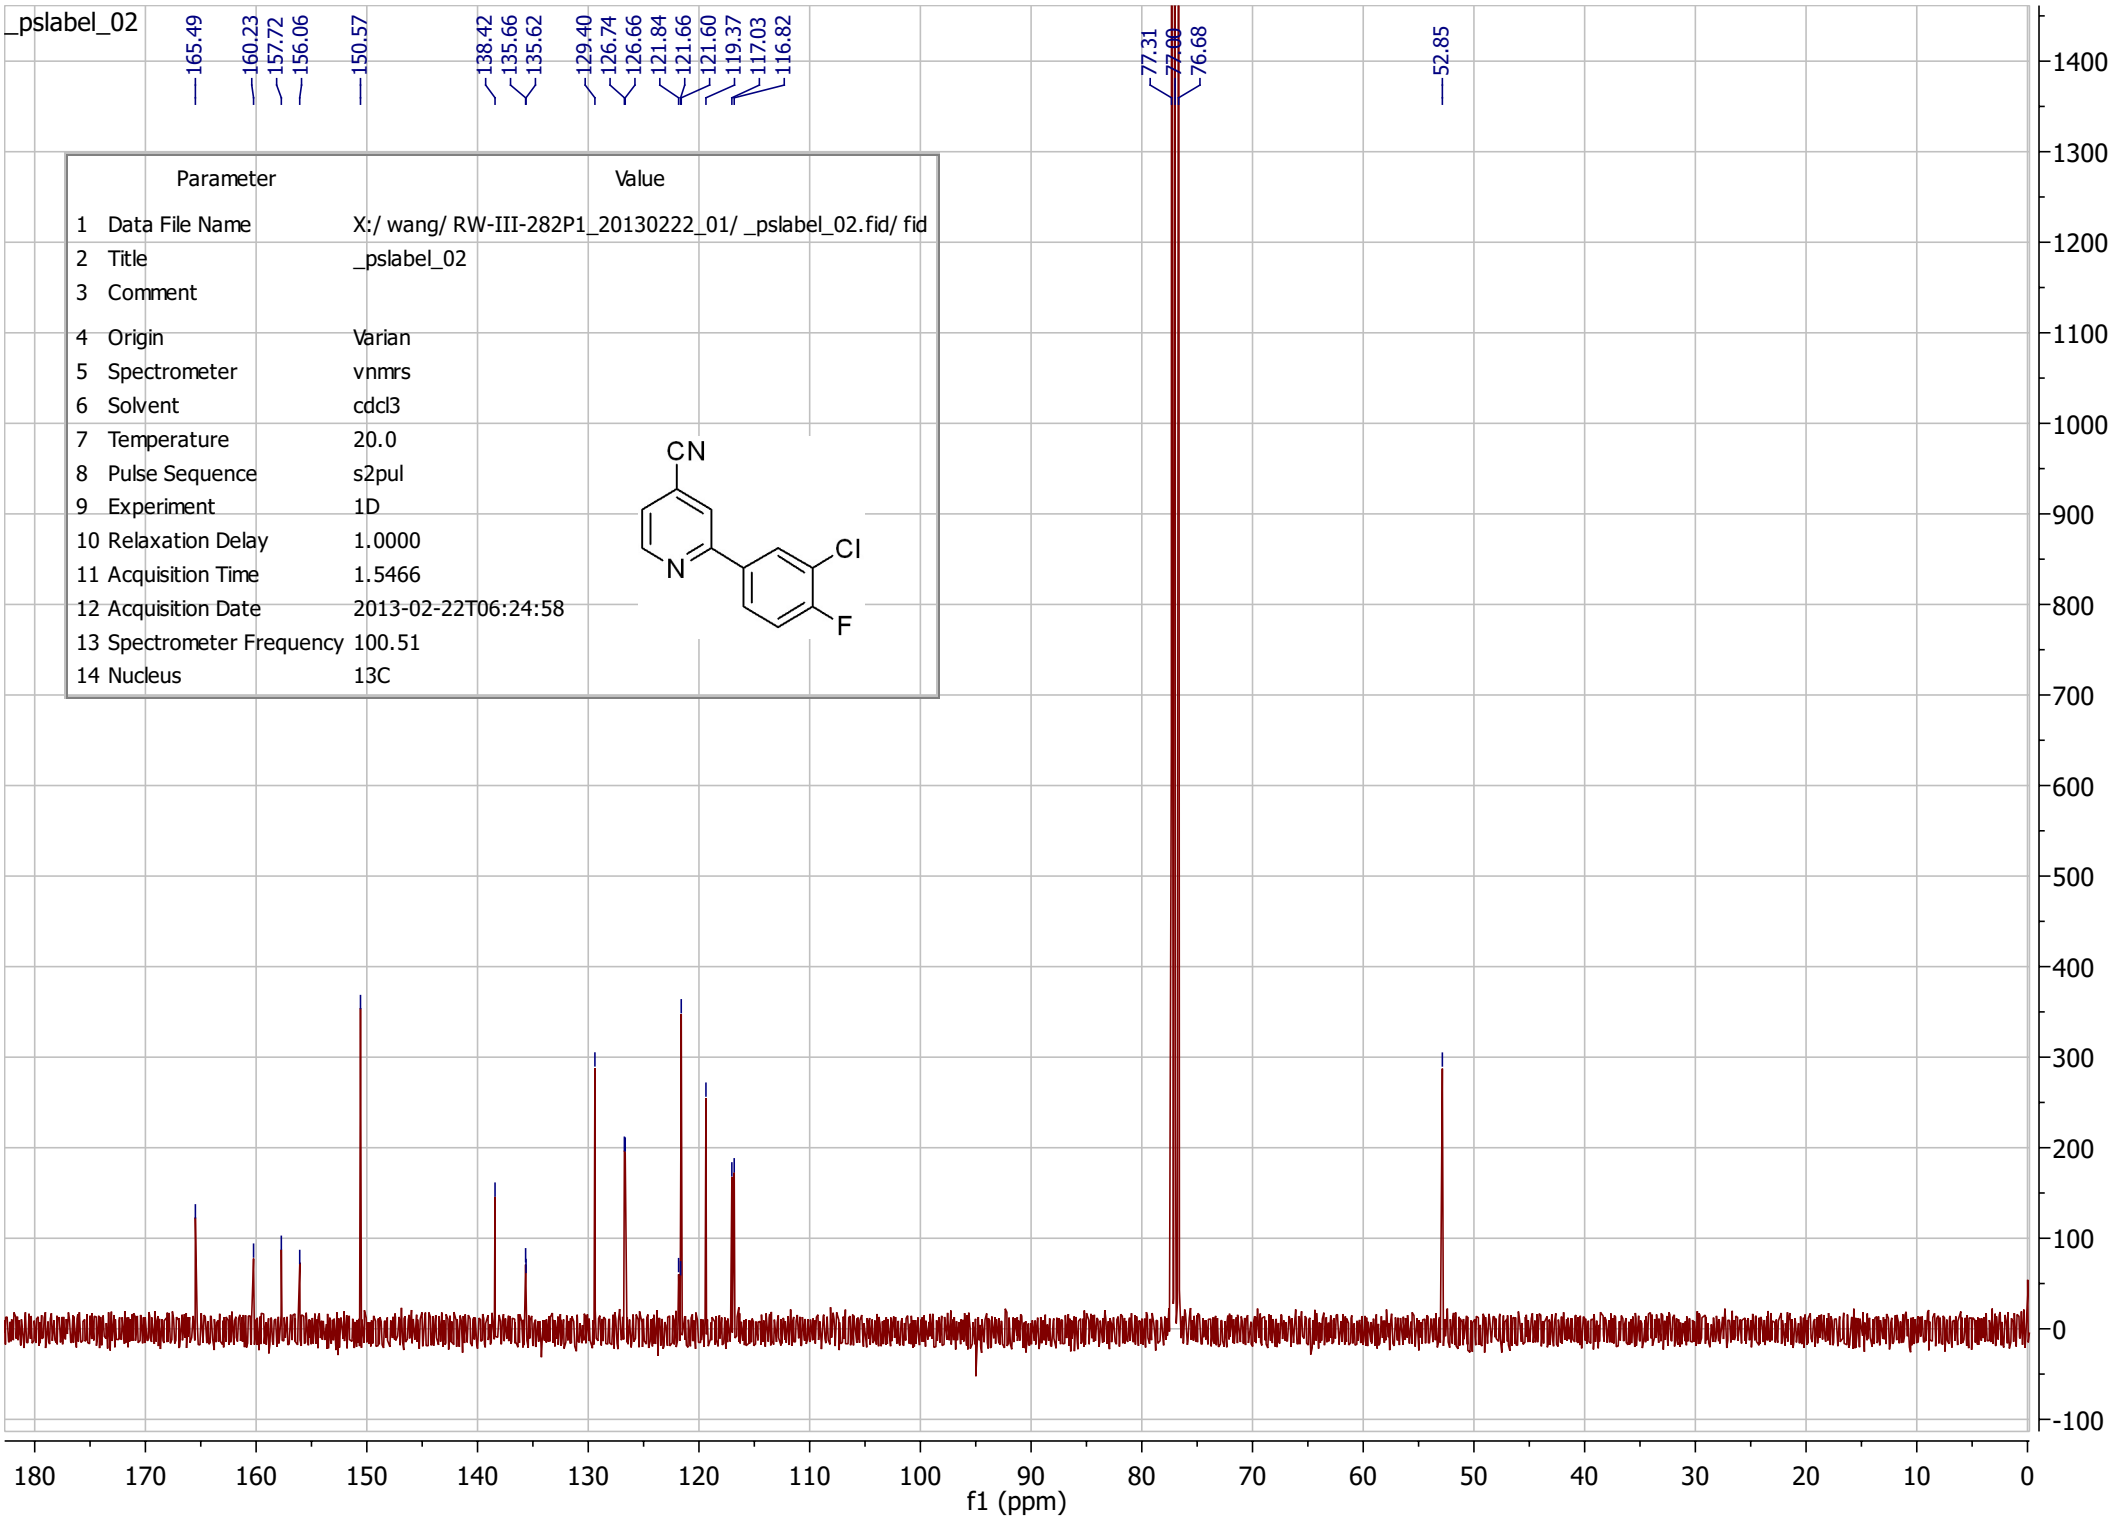

| Parameter                 | Value                                                   |
|---------------------------|---------------------------------------------------------|
| 1 Data File Name          | X:/ wang/ RW-III-282P1_20130222_01/_pslabel_02.fid/ fid |
| 2 Title                   | _pslabel_02                                             |
| 3 Comment                 |                                                         |
| 4 Origin                  | Varian                                                  |
| 5 Spectrometer            | vnmrs                                                   |
| 6 Solvent                 | cdcl3                                                   |
| 7 Temperature             | 20.0                                                    |
| 8 Pulse Sequence          | s2pul                                                   |
| 9 Experiment              | 1D                                                      |
| 10 Relaxation Delay       | 1.0000                                                  |
| 11 Acquisition Time       | 1.5466                                                  |
| 12 Acquisition Date       | 2013-02-22T06:24:58                                     |
| 13 Spectrometer Frequency | 100.51                                                  |
| 14 Nucleus                | 13C                                                     |

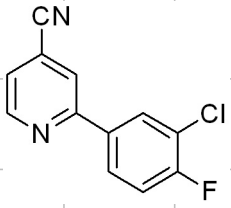

\_pslabel\_03

| Parameter                 | Value                                                    |
|---------------------------|----------------------------------------------------------|
| 1 Data File Name          | X:/ wang/ RW-III-282P1_20130222_01/ _pslabel_03.fid/ fid |
| 2 Title                   | _pslabel_03                                              |
| 3 Comment                 |                                                          |
| 4 Origin                  | Varian                                                   |
| 5 Spectrometer            | vnms                                                     |
| 6 Solvent                 | cdcl3                                                    |
| 7 Temperature             | 20.0                                                     |
| 8 Pulse Sequence          | s2pul                                                    |
| 9 Experiment              | 1D                                                       |
| 10 Relaxation Delay       | 1.0000                                                   |
| 11 Acquisition Time       | 0.7340                                                   |
| 12 Acquisition Date       | 2013-02-22T07:22:40                                      |
| 13 Spectrometer Frequency | 376.03                                                   |
| 14 Nucleus                | 19F                                                      |

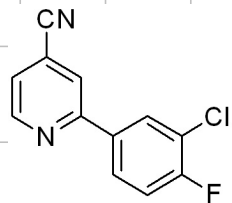

---114.52

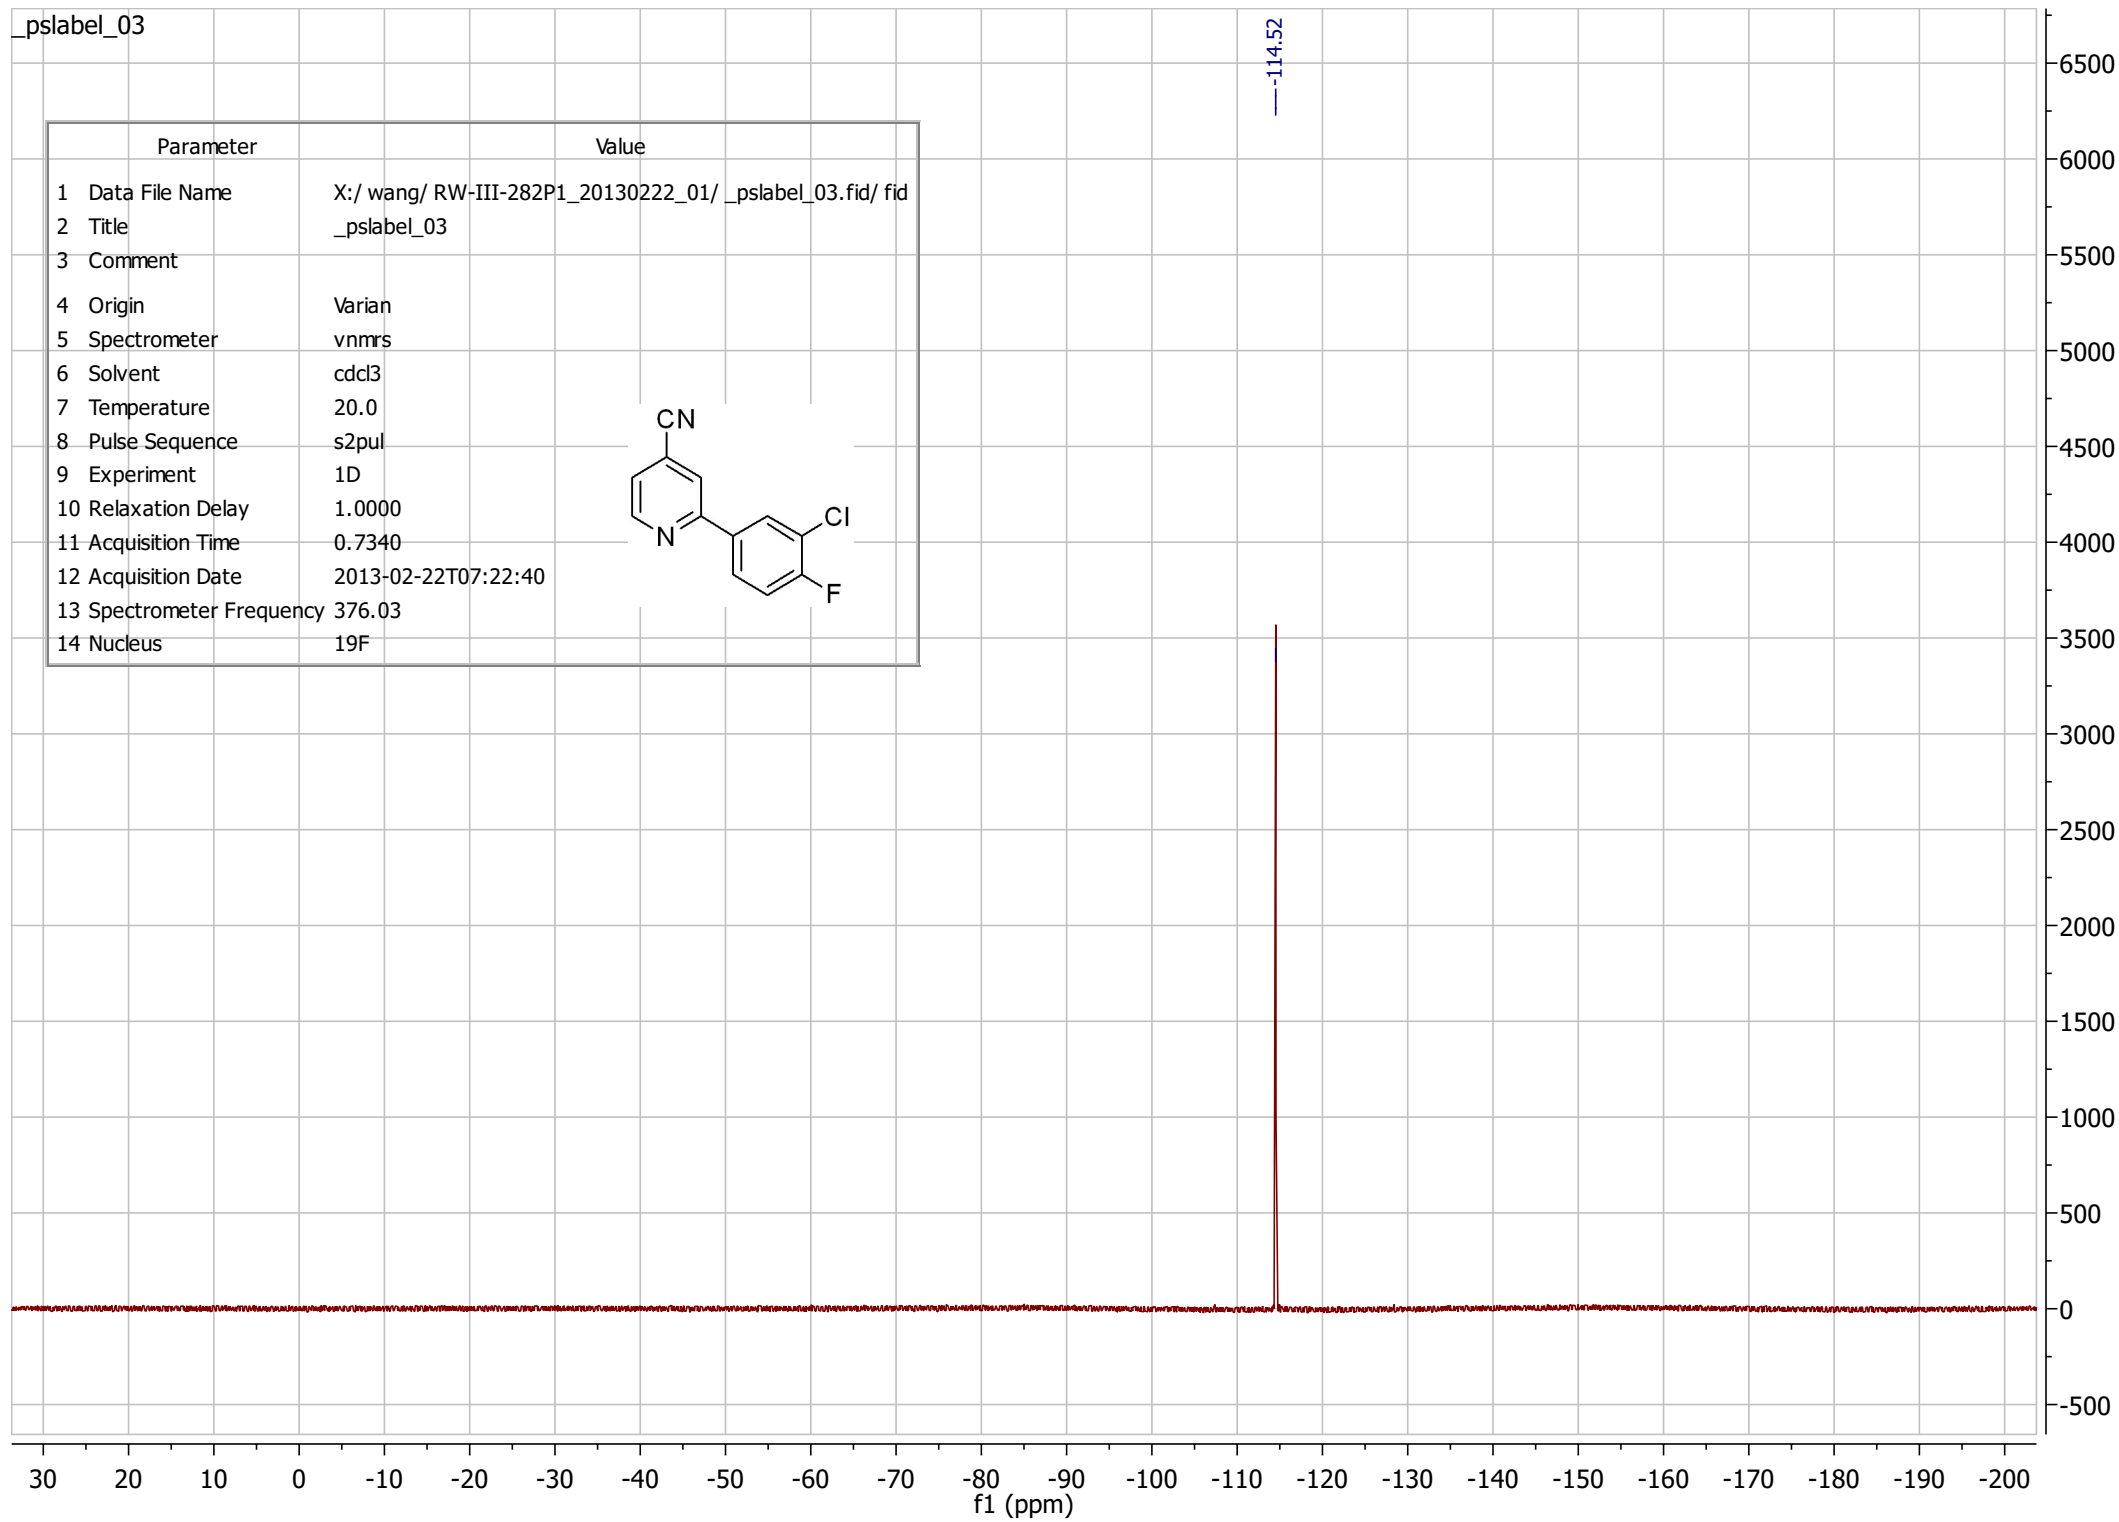

\_pslabel\_01

8.83  
8.80  
8.79  
7.65  
7.63  
7.62  
7.61  
7.49  
7.49  
7.48  
7.48  
7.47  
7.47  
7.46  
7.46  
7.35  
7.33  
7.31  
7.26  
7.26

-0.00

| Parameter                 | Value                                                    |
|---------------------------|----------------------------------------------------------|
| 1 Data File Name          | X:/ wang/ RW-III-282P2_20130222_01/ _pslabel_01.fid/ fid |
| 2 Title                   | _pslabel_01                                              |
| 3 Comment                 |                                                          |
| 4 Origin                  | Varian                                                   |
| 5 Spectrometer            | vnmrs                                                    |
| 6 Solvent                 | cdcl3                                                    |
| 7 Temperature             | 20.0                                                     |
| 8 Pulse Sequence          | s2pul                                                    |
| 9 Experiment              | 1D                                                       |
| 10 Relaxation Delay       | 1.0000                                                   |
| 11 Acquisition Time       | 2.5559                                                   |
| 12 Acquisition Date       | 2013-02-22T07:29:19                                      |
| 13 Spectrometer Frequency | 399.67                                                   |
| 14 Nucleus                | 1H                                                       |

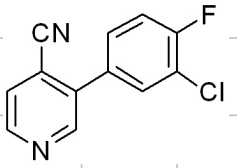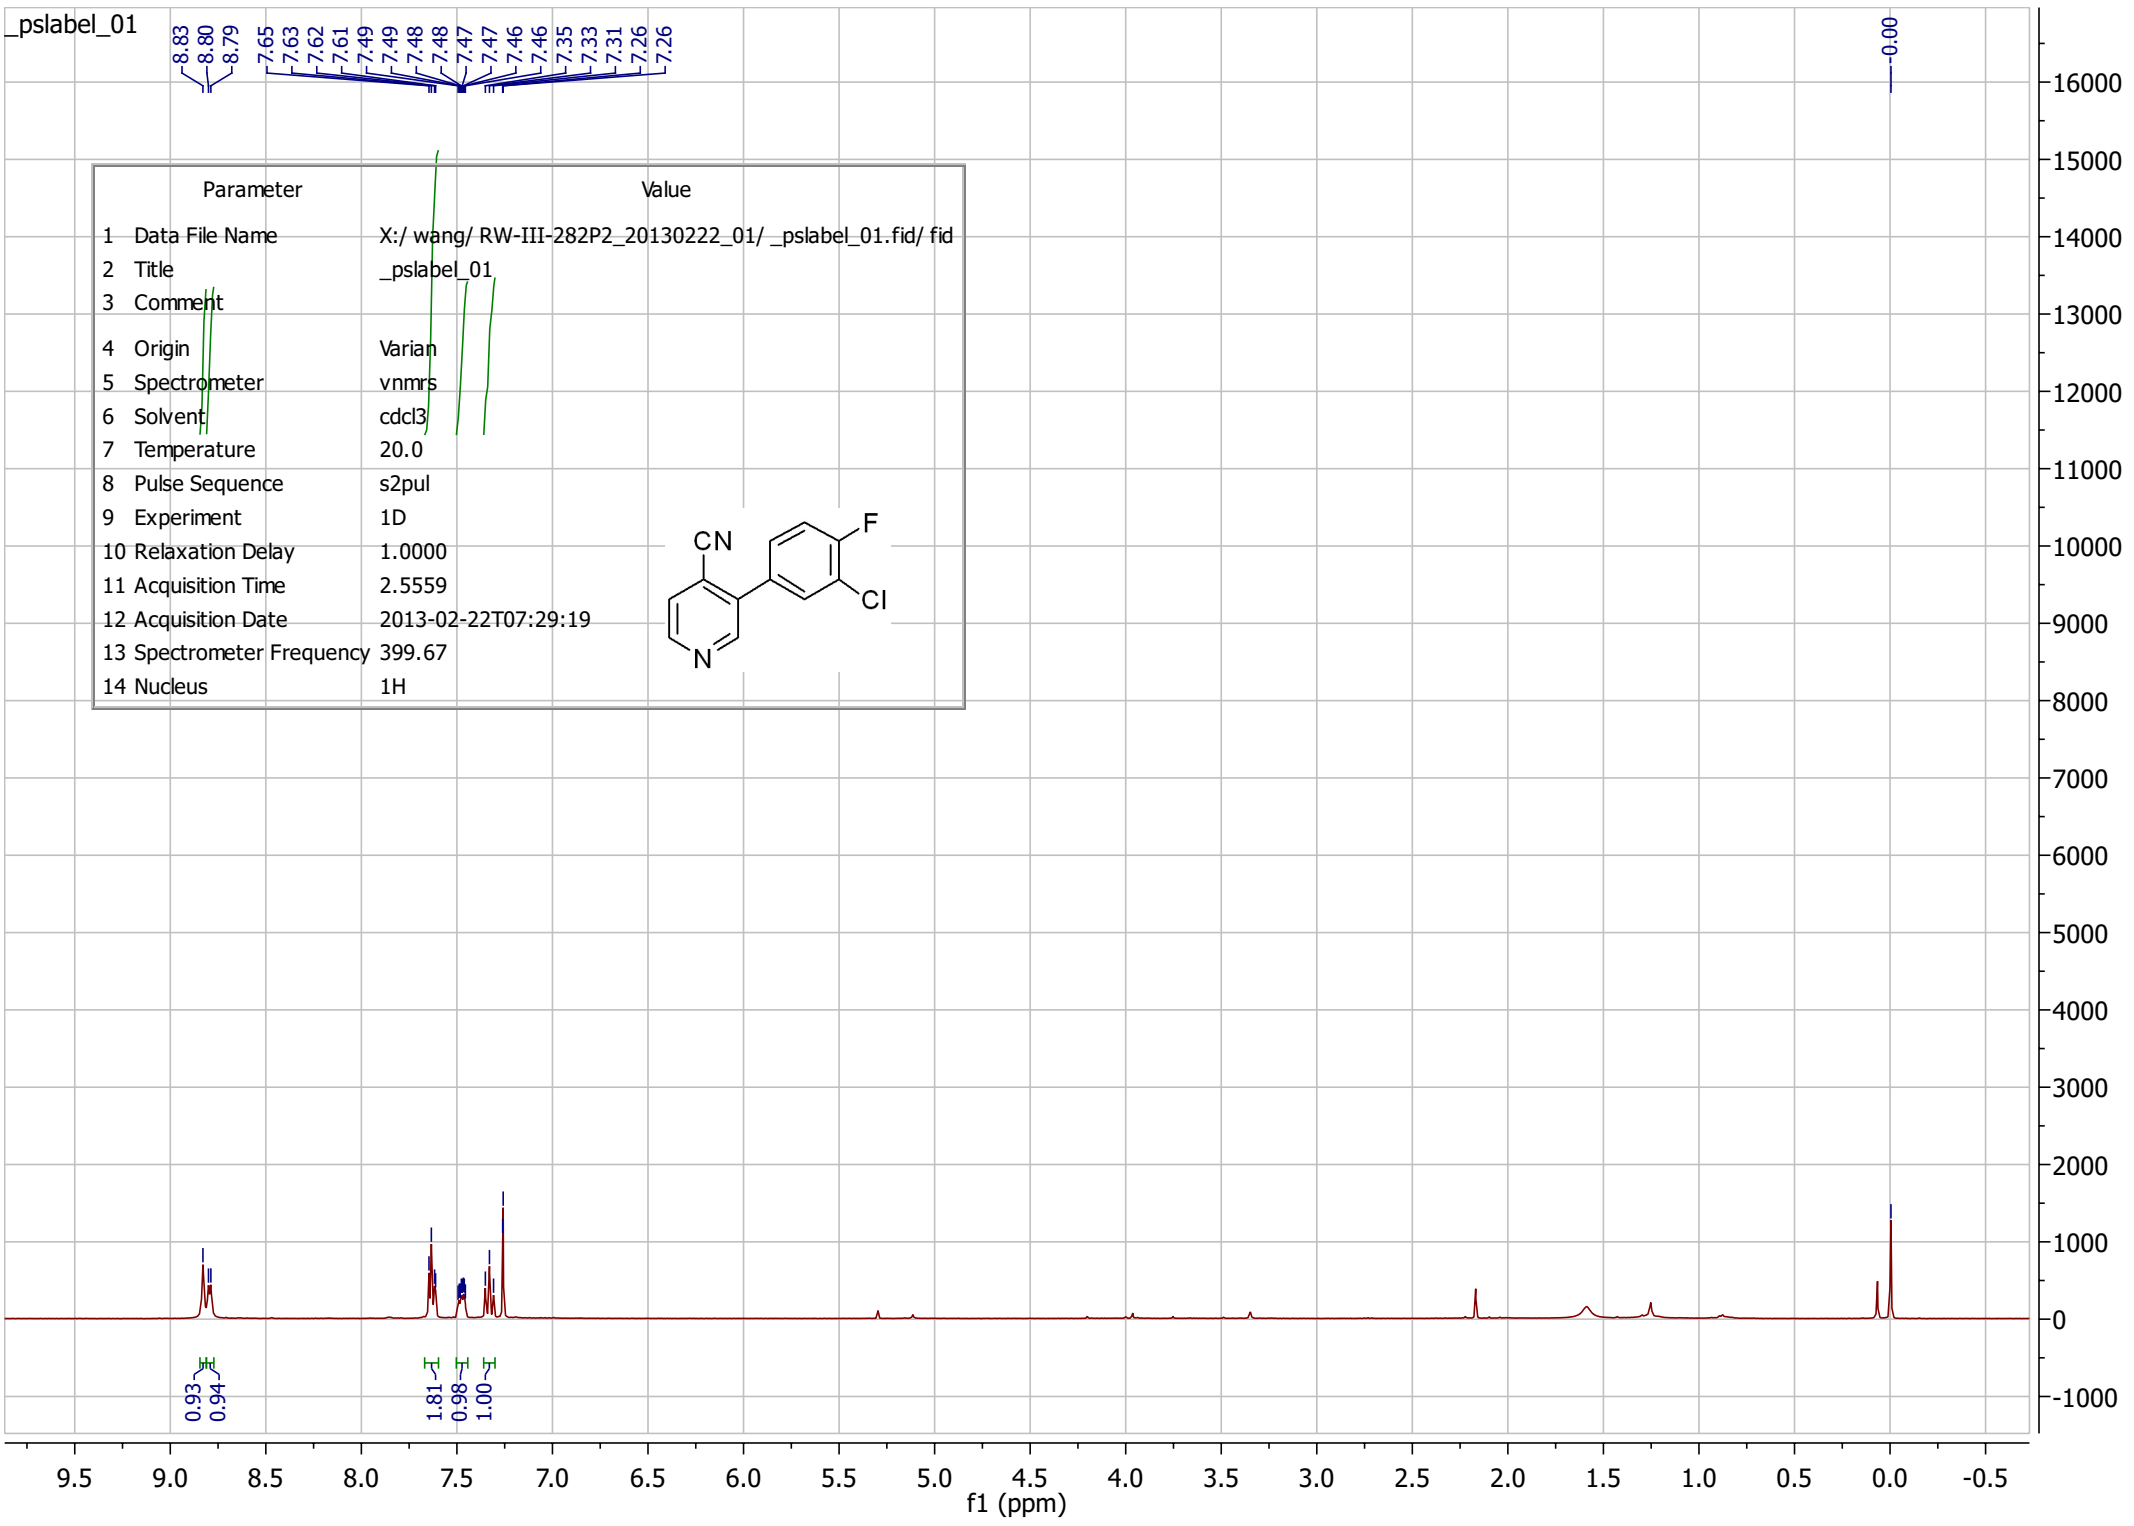



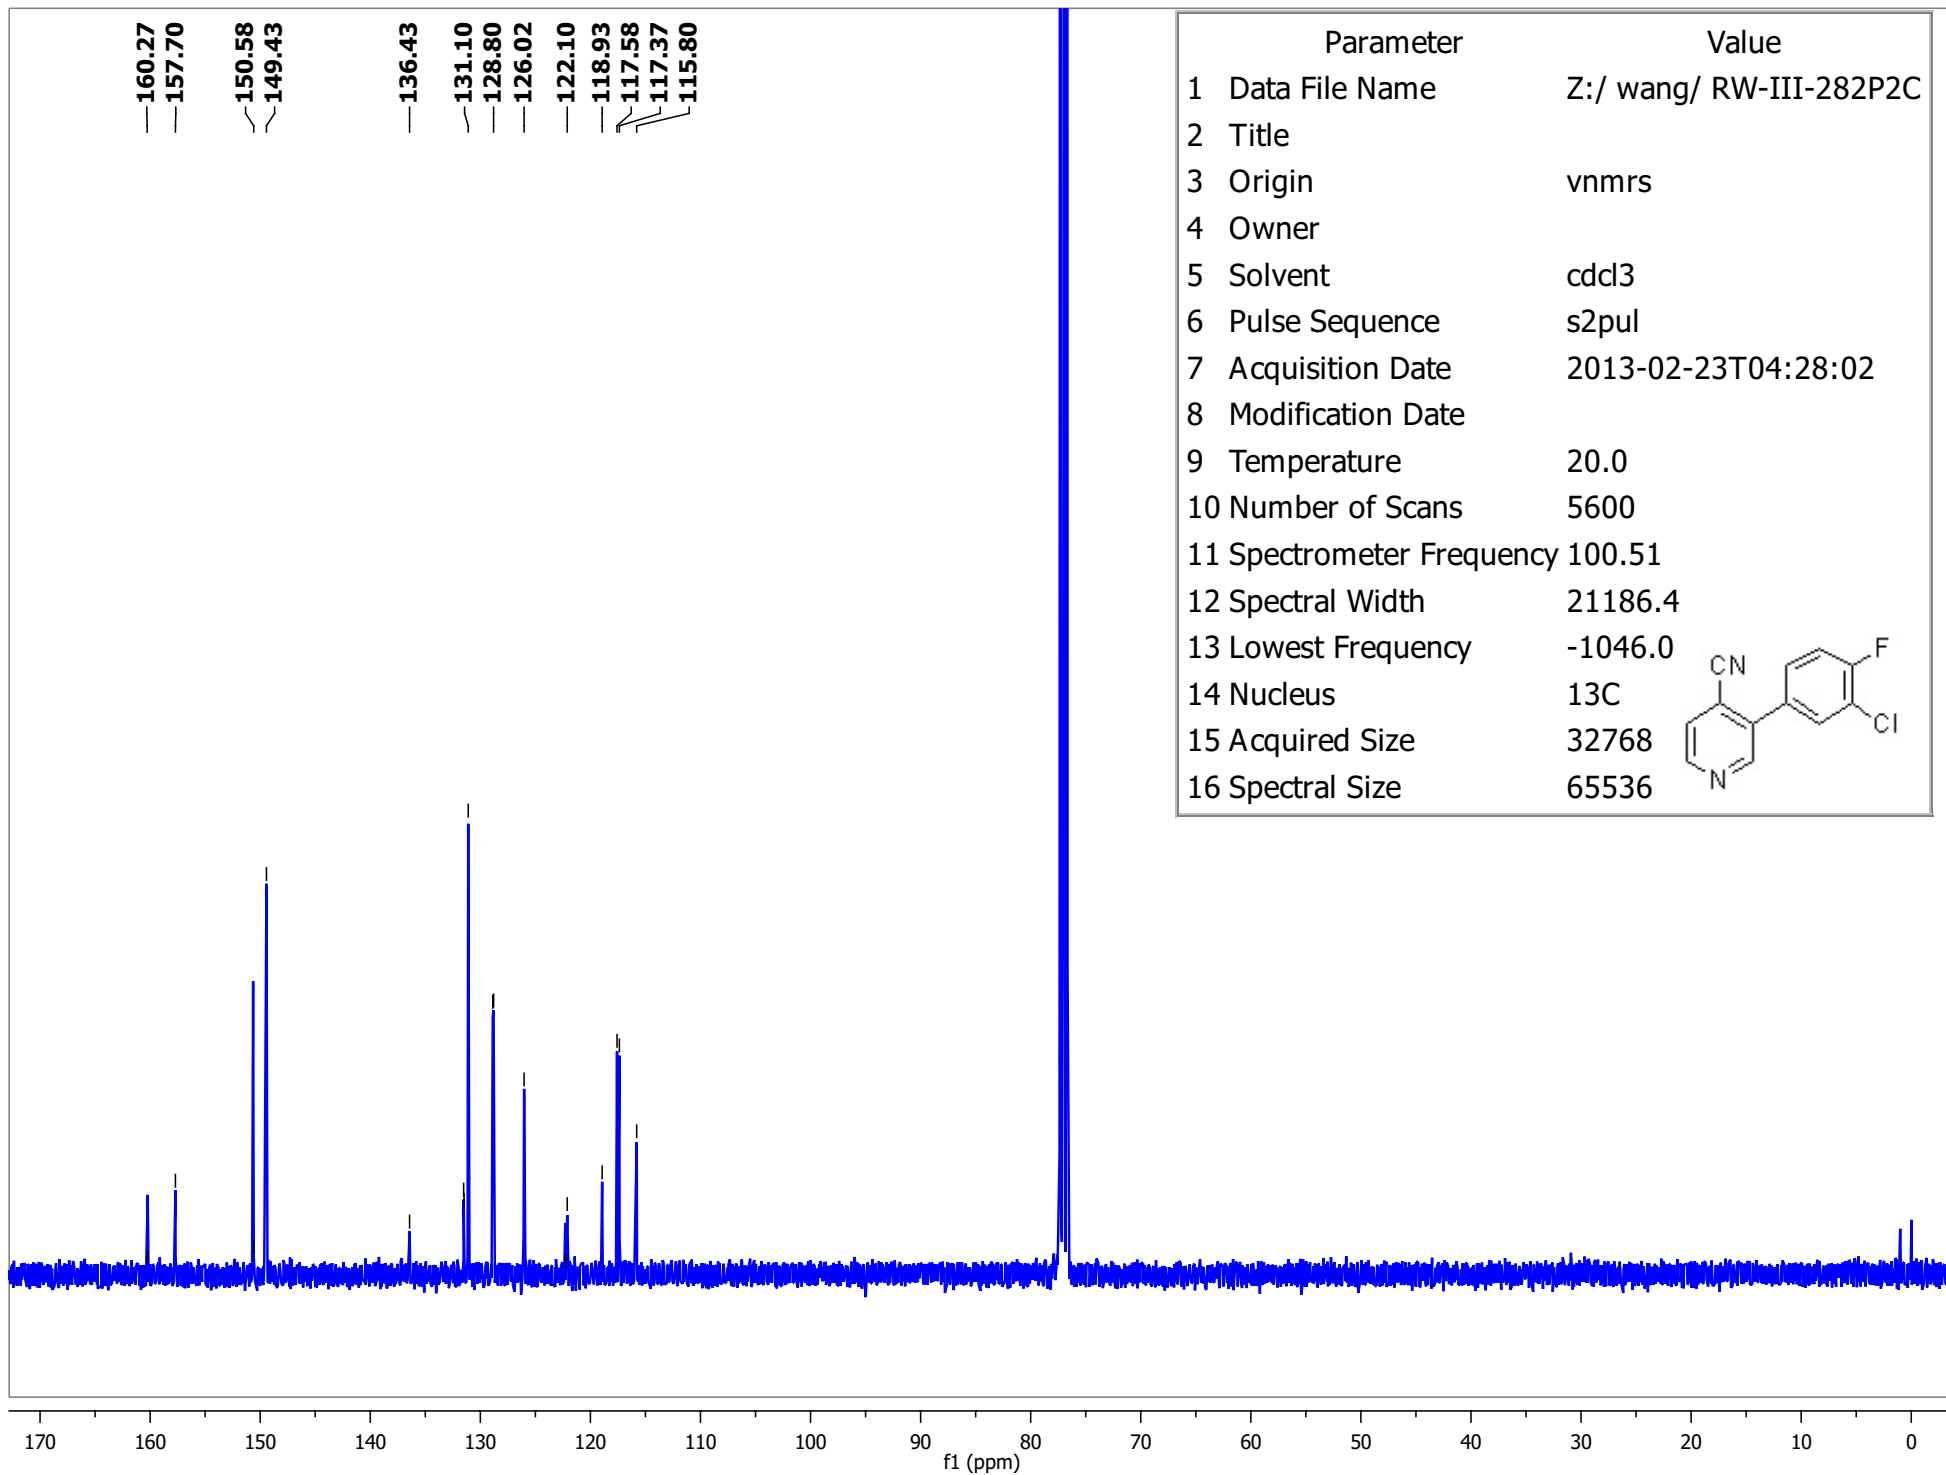

\_pslabel\_03

| Parameter                 | Value                                                   |
|---------------------------|---------------------------------------------------------|
| 1 Data File Name          | X:/ wang/ RW-III-282P2_20130222_01/_pslabel_03.fid/ fid |
| 2 Title                   | _pslabel_03                                             |
| 3 Comment                 |                                                         |
| 4 Origin                  | Varian                                                  |
| 5 Spectrometer            | vnmrs                                                   |
| 6 Solvent                 | cdcl3                                                   |
| 7 Temperature             | 20.0                                                    |
| 8 Pulse Sequence          | s2pul                                                   |
| 9 Experiment              | 1D                                                      |
| 10 Relaxation Delay       | 1.0000                                                  |
| 11 Acquisition Time       | 0.7340                                                  |
| 12 Acquisition Date       | 2013-02-22T08:29:16                                     |
| 13 Spectrometer Frequency | 376.03                                                  |
| 14 Nucleus                | 19F                                                     |

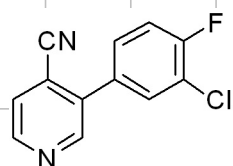

---113.29

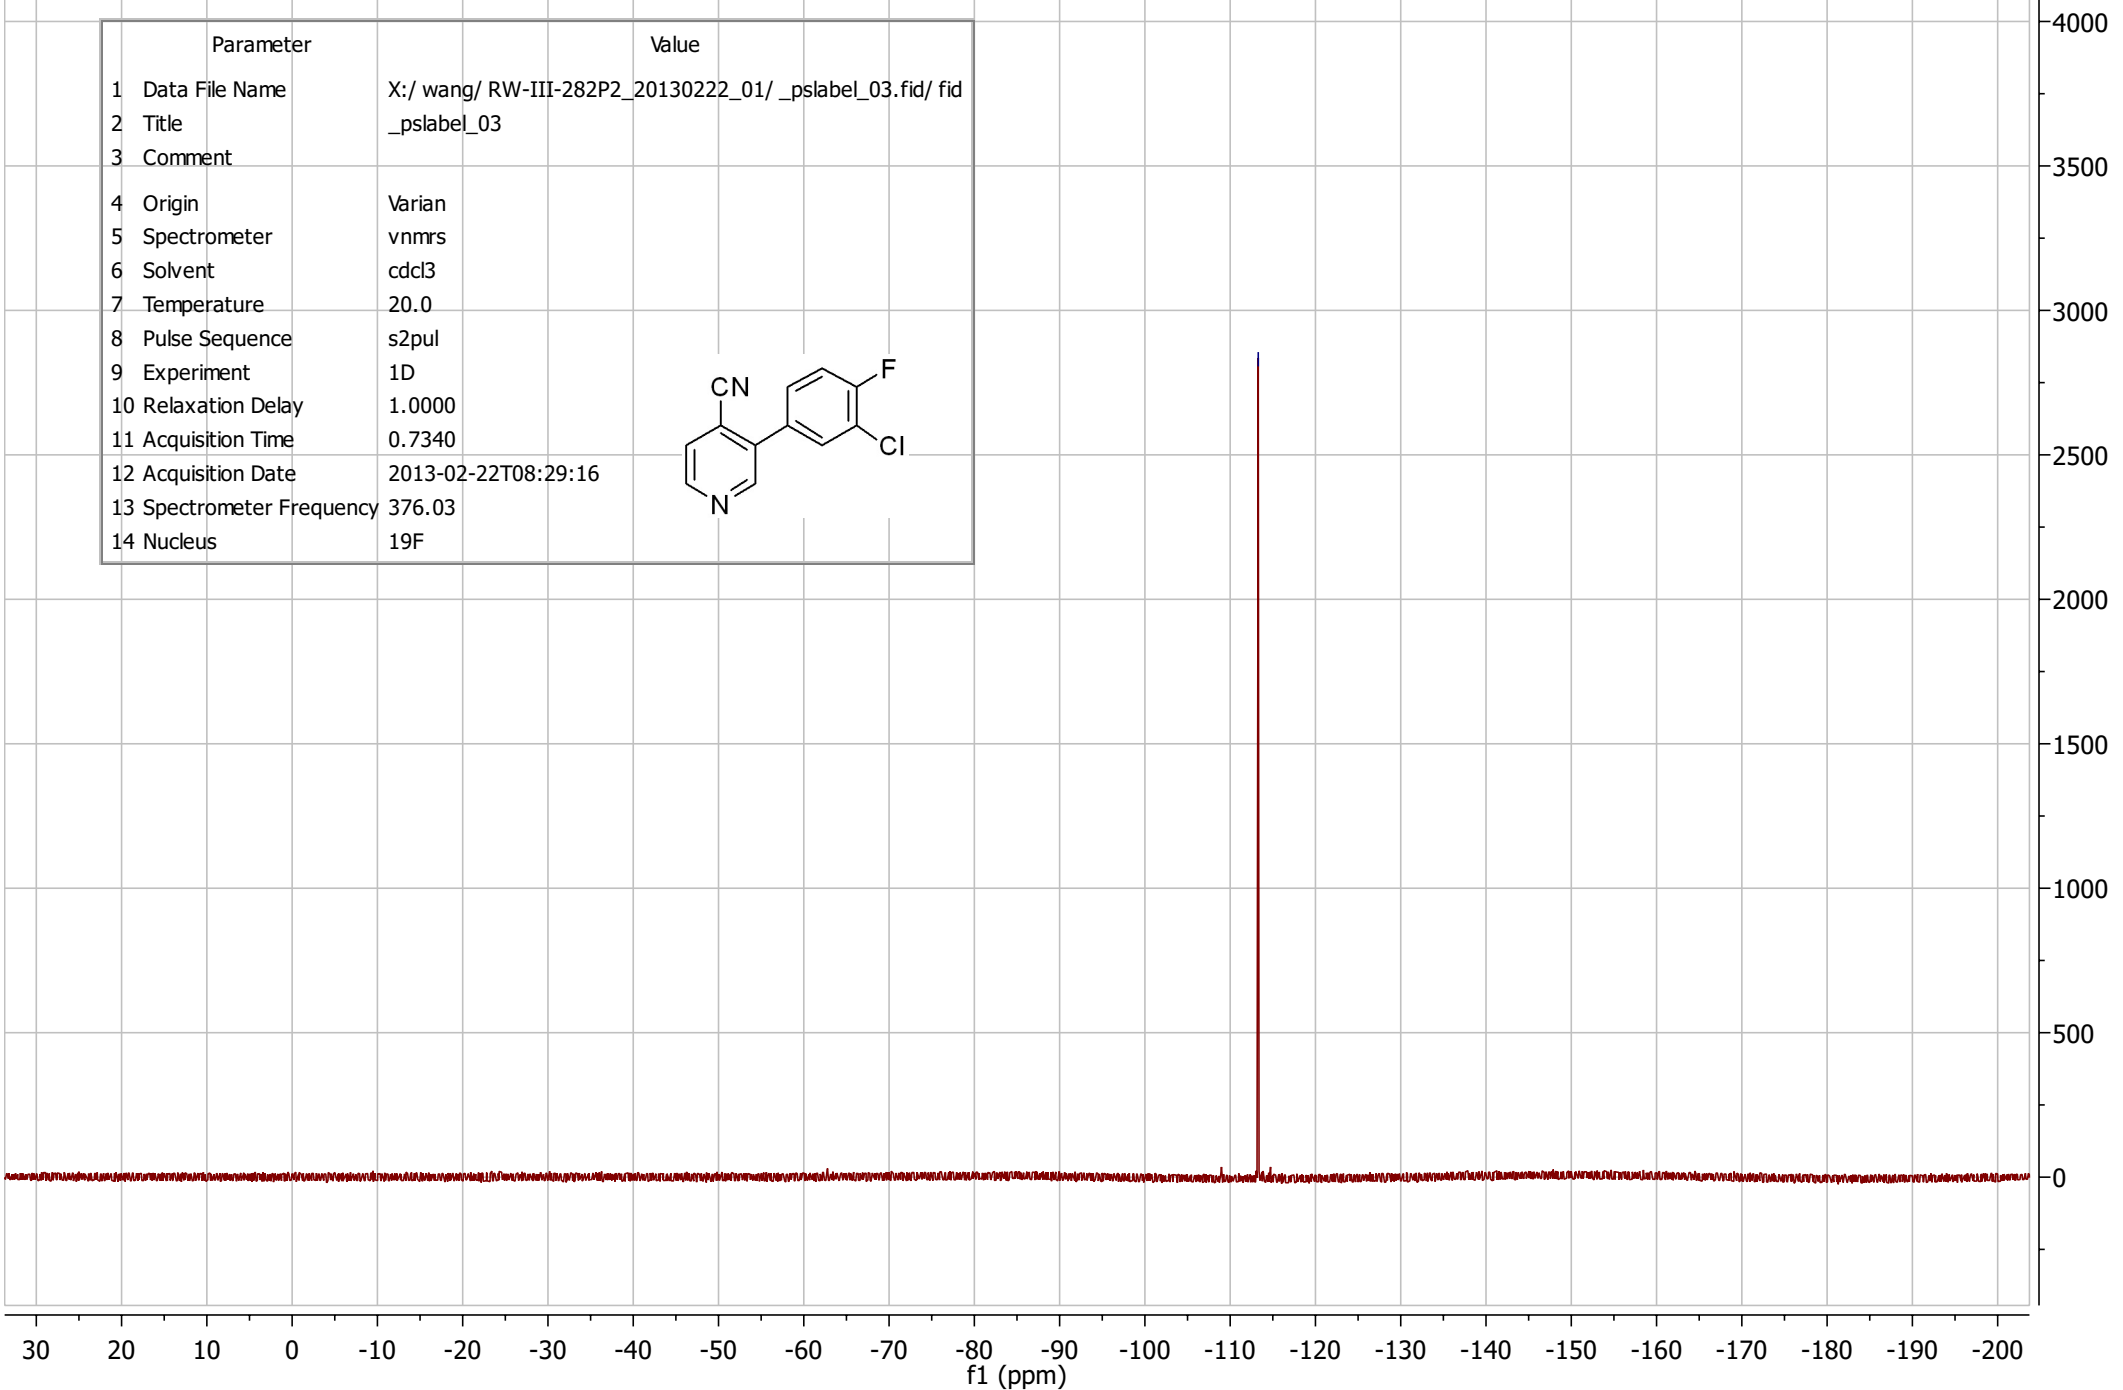

\_pslabel\_01

7.34  
7.31  
7.26  
7.05  
7.04  
6.94  
6.92  
6.91  
6.77  
6.75  
6.70  
6.68

| Parameter                 | Value                                                   |
|---------------------------|---------------------------------------------------------|
| 1 Data File Name          | X:/ wang/ RW-III-301P1_20130226_01/_pslabel_01.fid/ fid |
| 2 Title                   | _pslabel_01                                             |
| 3 Comment                 |                                                         |
| 4 Origin                  | Varian                                                  |
| 5 Spectrometer            | vnmrs                                                   |
| 6 Solvent                 | cdcl3                                                   |
| 7 Temperature             | 20.0                                                    |
| 8 Pulse Sequence          | s2pul                                                   |
| 9 Experiment              | 1D                                                      |
| 10 Relaxation Delay       | 1.0000                                                  |
| 11 Acquisition Time       | 2.5559                                                  |
| 12 Acquisition Date       | 2013-02-26T10:19:44                                     |
| 13 Spectrometer Frequency | 399.67                                                  |
| 14 Nucleus                | 1H                                                      |

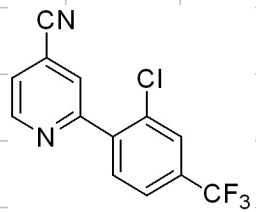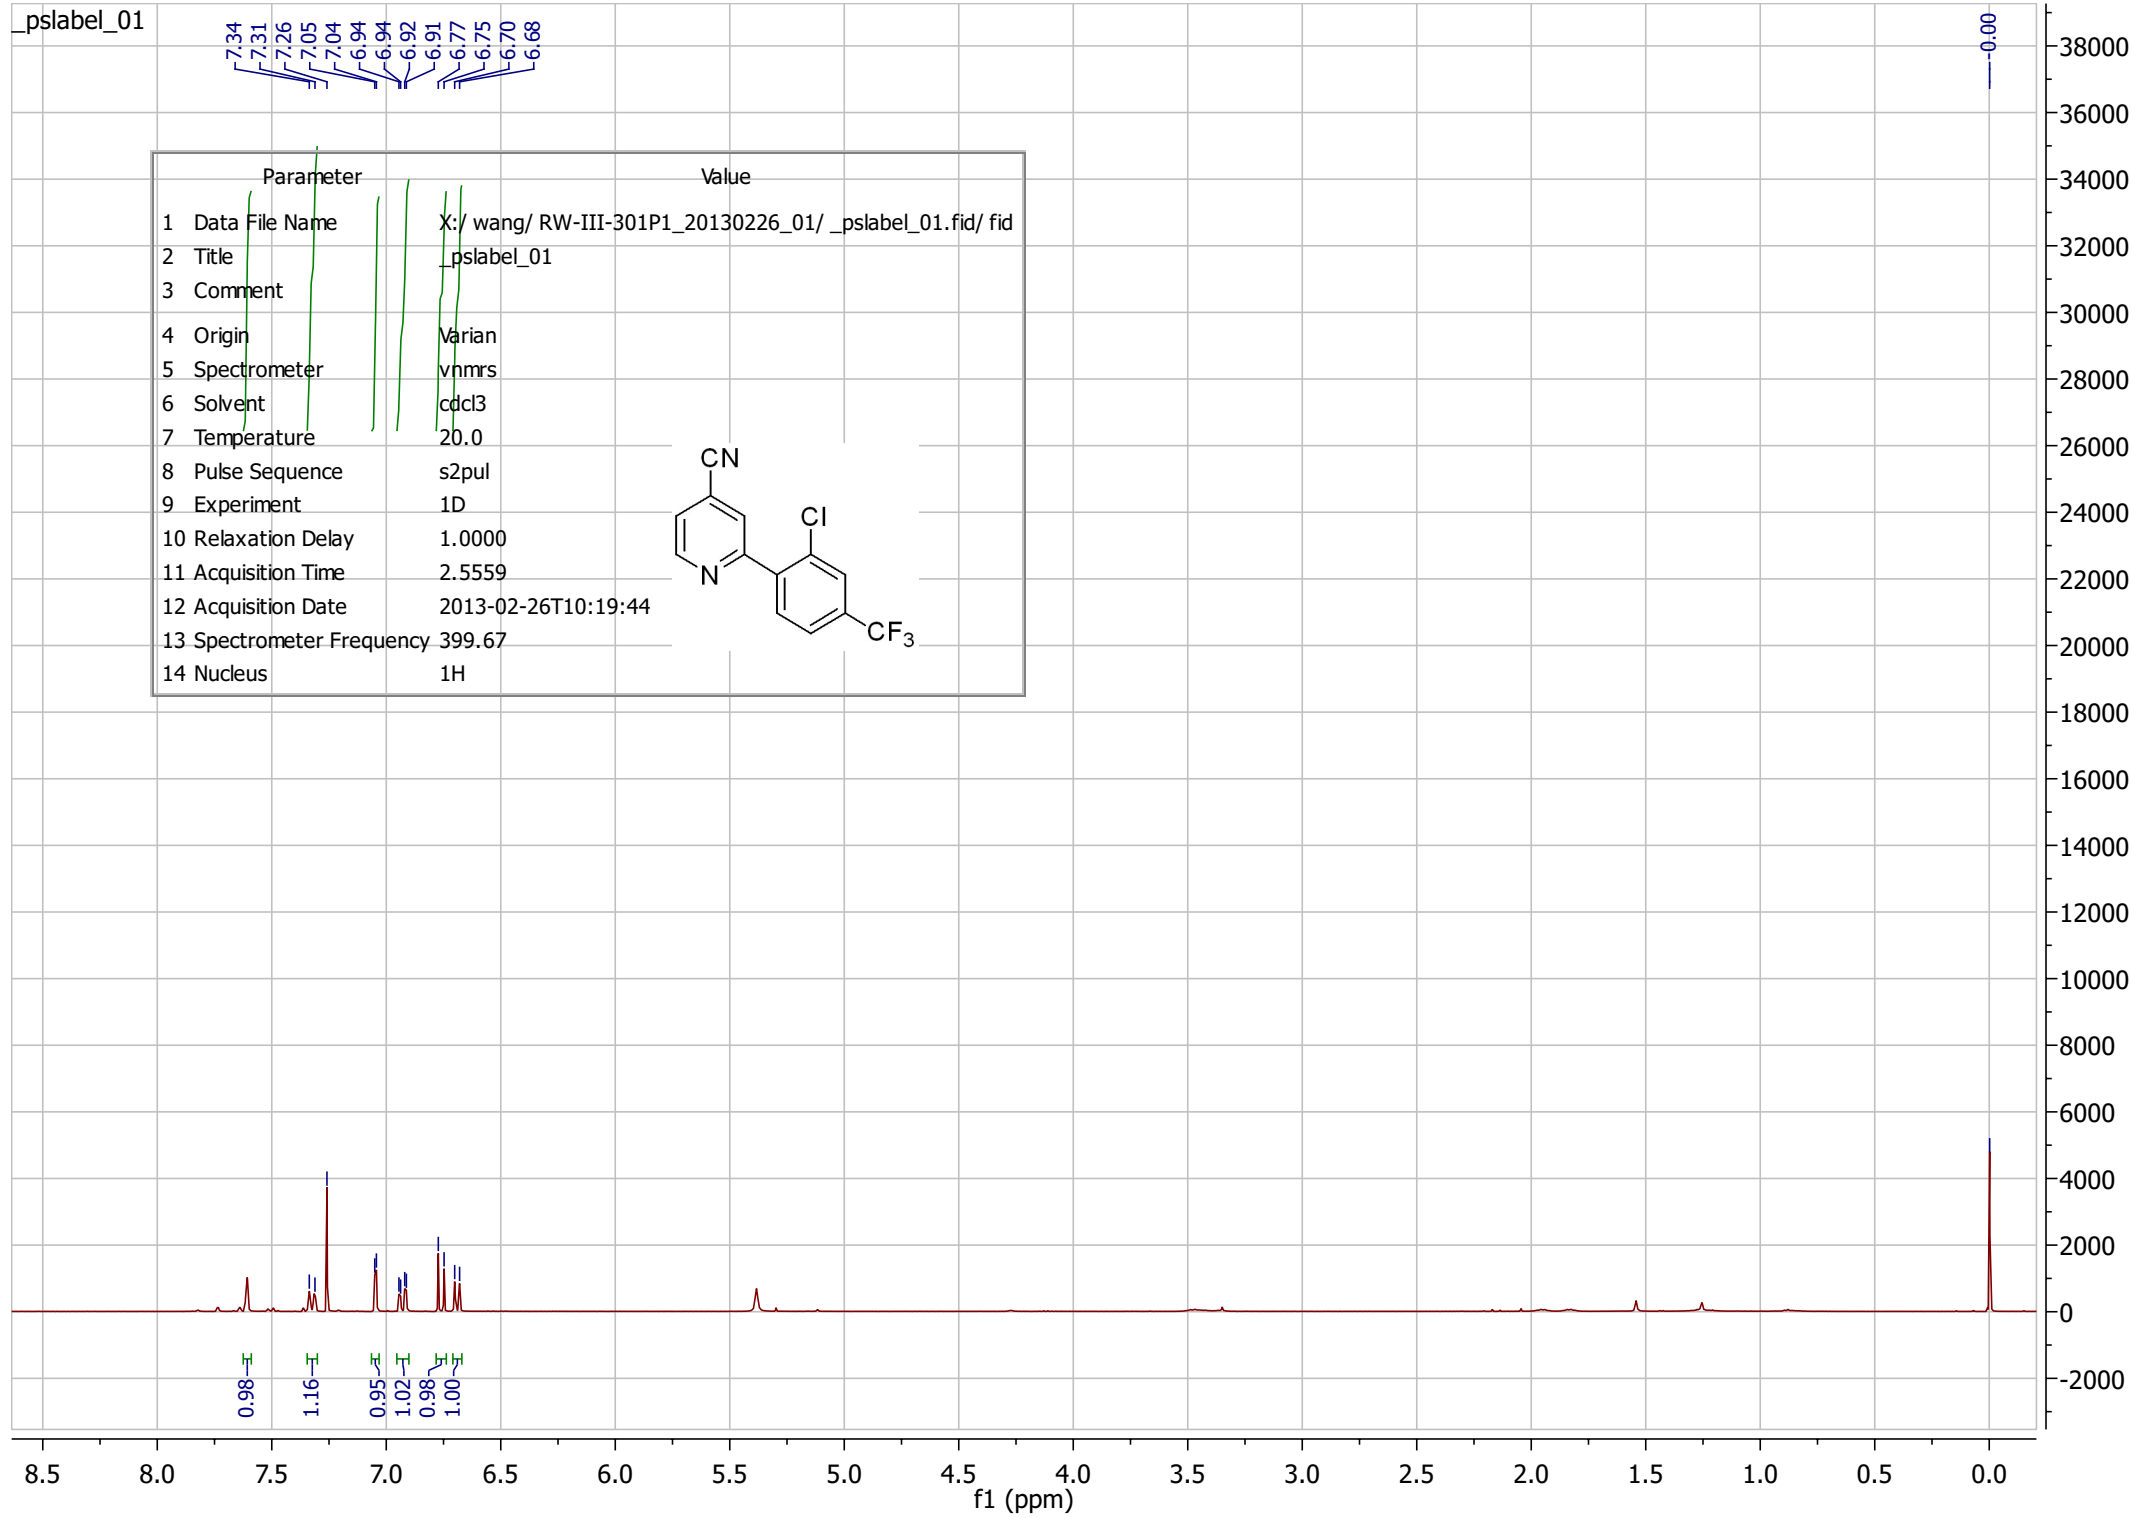

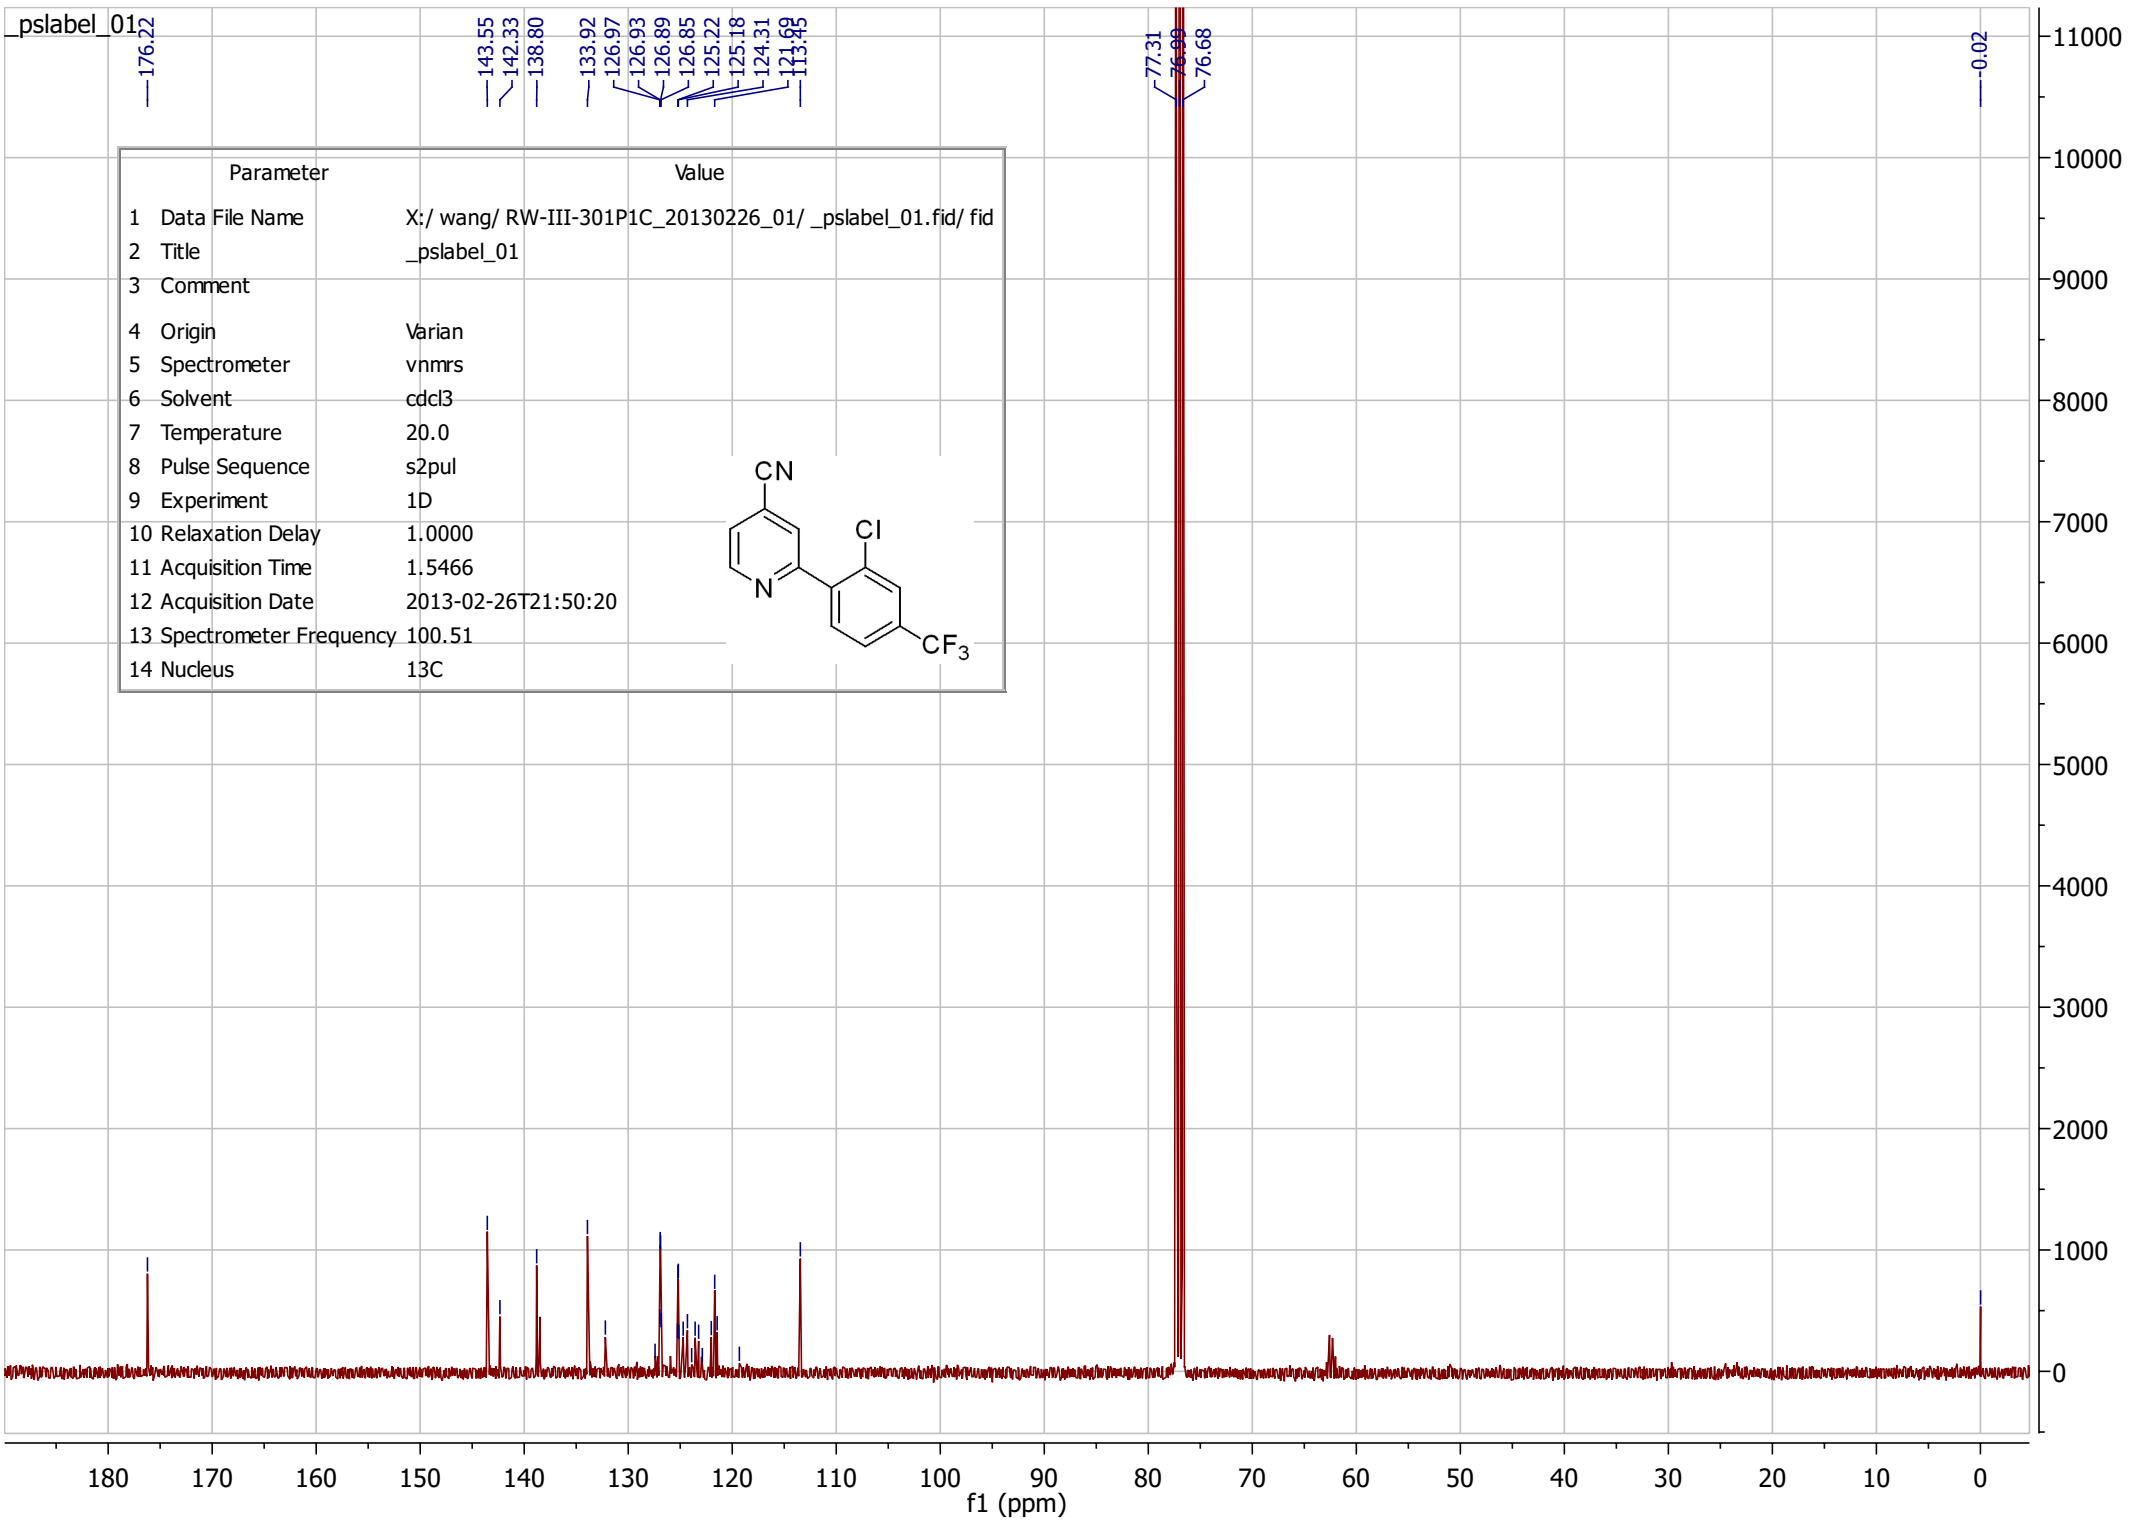

\_pslabel\_02

| Parameter                 | Value                                                    |
|---------------------------|----------------------------------------------------------|
| 1 Data File Name          | X:/ wang/ RW-III-301P1_20130226_01/ _pslabel_02.fid/ fid |
| 2 Title                   | _pslabel_02                                              |
| 3 Comment                 |                                                          |
| 4 Origin                  | Varian                                                   |
| 5 Spectrometer            | vnmrs                                                    |
| 6 Solvent                 | cdcl3                                                    |
| 7 Temperature             | 20.0                                                     |
| 8 Pulse Sequence          | s2pul                                                    |
| 9 Experiment              | 1D                                                       |
| 10 Relaxation Delay       | 1.0000                                                   |
| 11 Acquisition Time       | 0.7340                                                   |
| 12 Acquisition Date       | 2013-02-26T10:24:04                                      |
| 13 Spectrometer Frequency | 376.03                                                   |
| 14 Nucleus                | 19F                                                      |

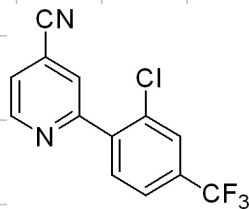

-61.41  
-62.03  
-62.16  
-62.64  
-62.95  
-75.49

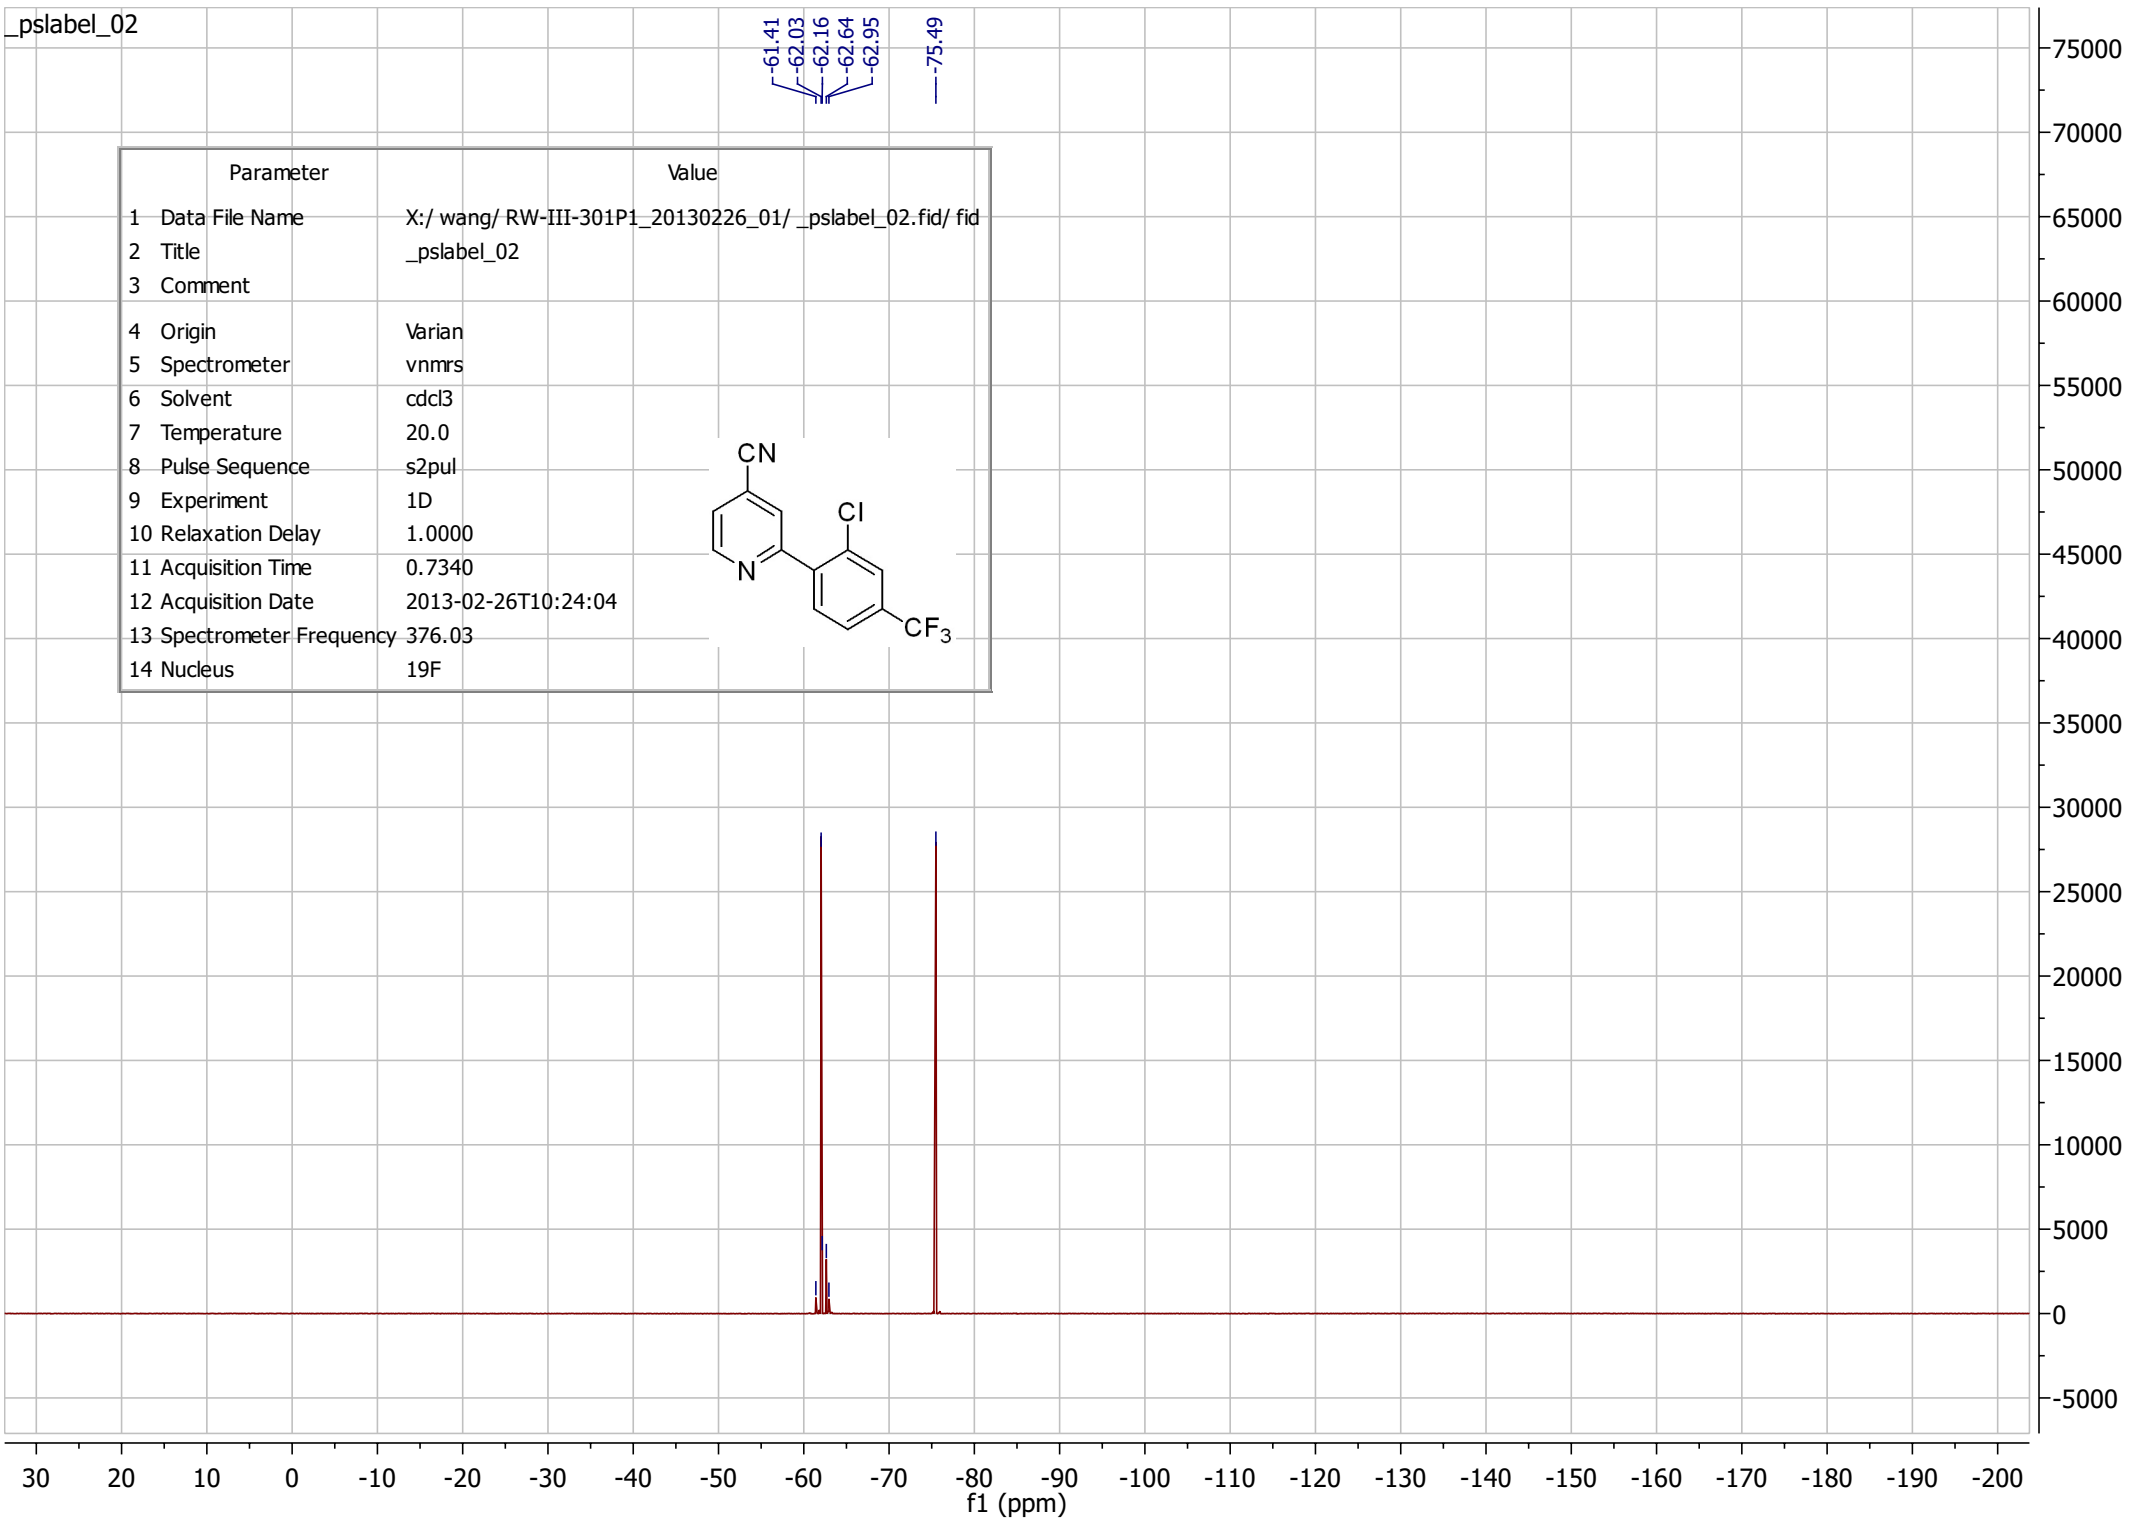

8.86  
8.85

7.93

7.55  
7.47  
7.42  
7.26

7.05  
7.04  
7.03  
7.02

3.90

3.49

-0.00

| Parameter                 | Value                   |
|---------------------------|-------------------------|
| 1 Data File Name          | Z:\ wang\ RW-III-269P1H |
| 2 Title                   |                         |
| 3 Origin                  | vnMrs                   |
| 4 Owner                   |                         |
| 5 Solvent                 | cdCl3                   |
| 6 Pulse Sequence          | s2pul                   |
| 7 Acquisition Date        | 2013-02-23T00:03:27     |
| 8 Modification Date       |                         |
| 9 Temperature             | 20.0                    |
| 10 Number of Scans        | 40                      |
| 11 Spectrometer Frequency | 399.67                  |
| 12 Spectral Width         | 6410.3                  |
| 13 Lowest Frequency       | -807.1                  |
| 14 Nucleus                | 1H                      |
| 15 Acquired Size          | 16384                   |
| 16 Spectral Size          | 32768                   |

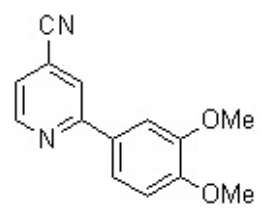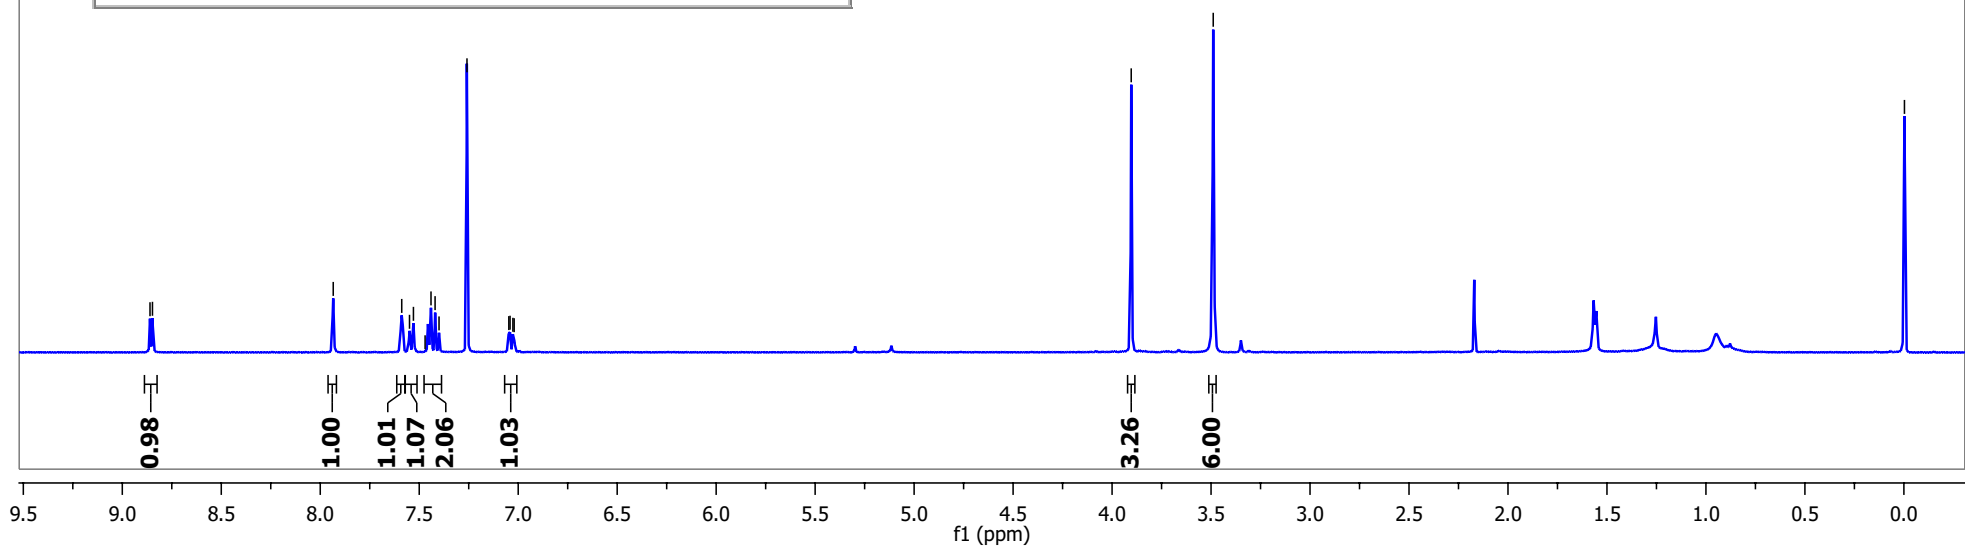

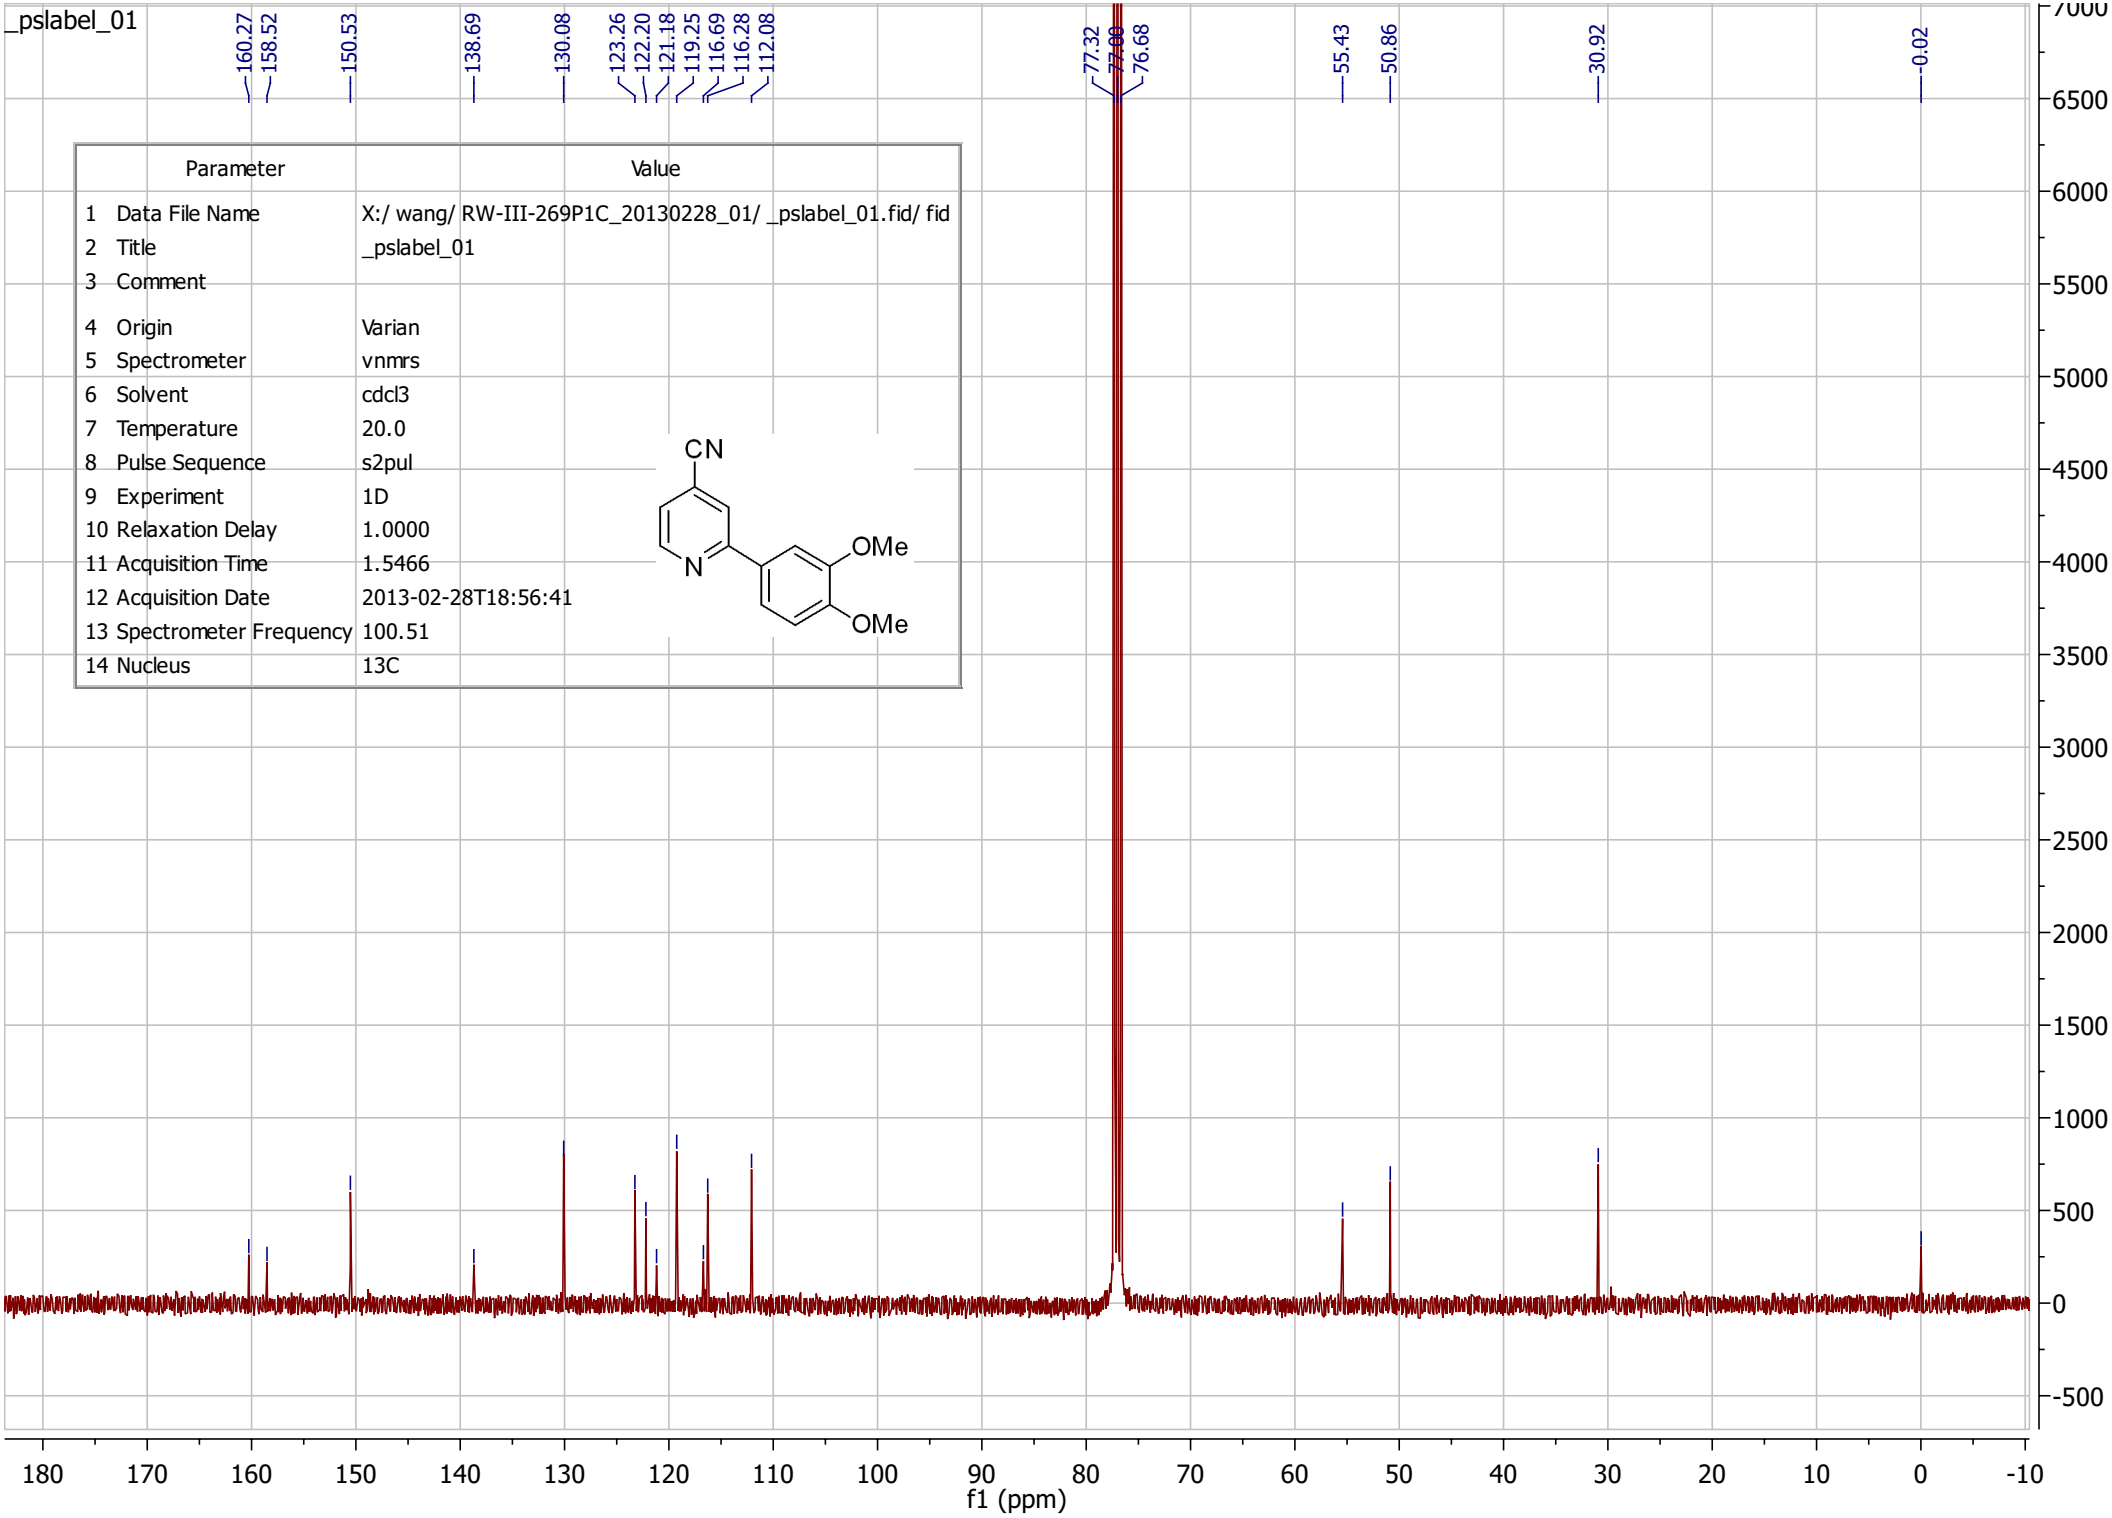

8.85  
8.83  
7.94  
7.92  
7.90  
7.42  
7.41  
7.32  
7.30  
7.26

2.43

| Parameter                 | Value                                                   |
|---------------------------|---------------------------------------------------------|
| 1 Data File Name          | Z:/ wang/ RW-III-215C_20130109_01/ _pslabel_01.fid/ fid |
| 2 Title                   |                                                         |
| 3 Origin                  | vnmrs                                                   |
| 4 Owner                   |                                                         |
| 5 Solvent                 | cdcl3                                                   |
| 6 Pulse Sequence          | s2pul                                                   |
| 7 Acquisition Date        | 2013-01-09T08:49:33                                     |
| 8 Modification Date       |                                                         |
| 9 Temperature             | 20.0                                                    |
| 10 Number of Scans        | 64                                                      |
| 11 Spectrometer Frequency | 399.67                                                  |
| 12 Spectral Width         | 6410.3                                                  |
| 13 Lowest Frequency       | -807.1                                                  |
| 14 Nucleus                | 1H                                                      |
| 15 Acquired Size          | 16384                                                   |
| 16 Spectral Size          | 32768                                                   |

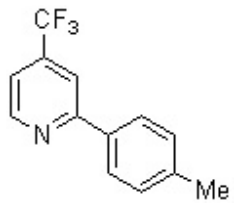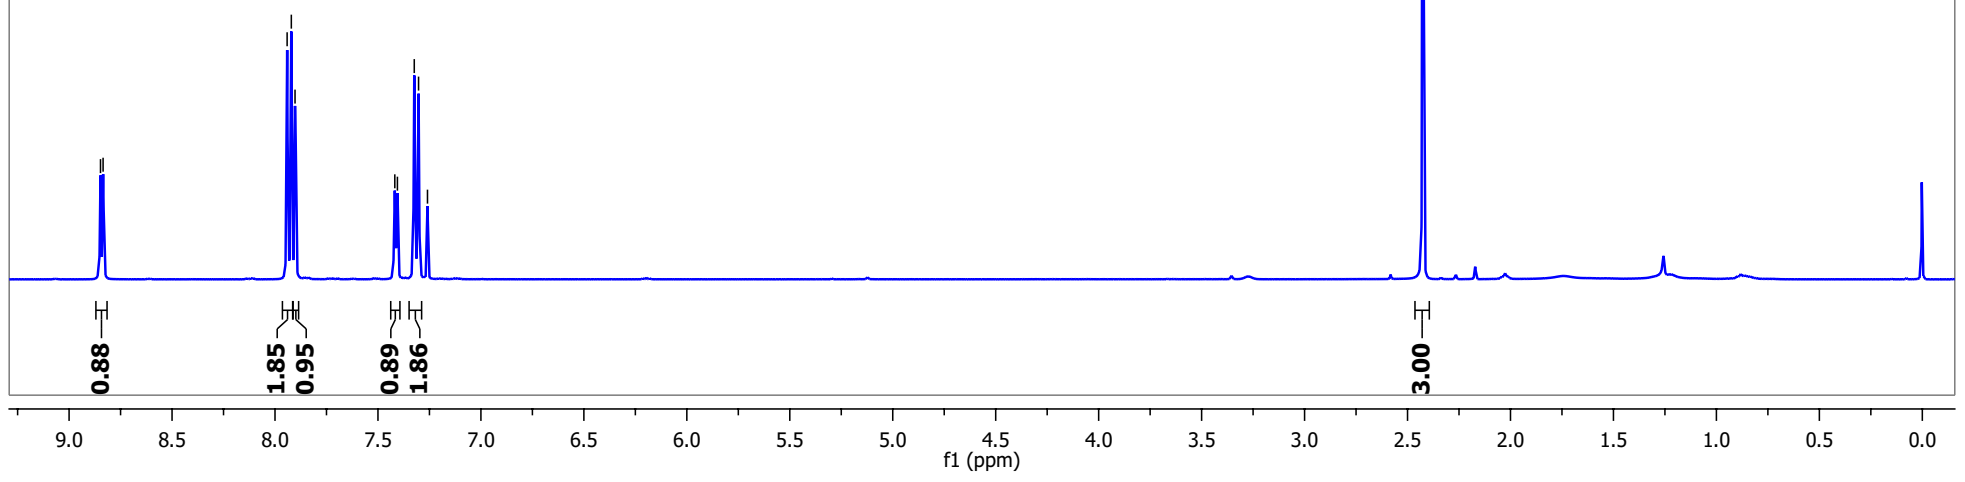



158.78  
 150.52  
 140.04  
 139.52  
 139.19  
 138.85  
 138.51  
 135.24  
 129.69  
 126.87  
 124.28  
 121.63  
 117.22  
 117.18  
 117.15  
 117.11  
 115.72  
 115.69  
 115.65  
 115.61

77.32  
 77.00  
 76.68

21.31

| Parameter                 | Value                                                   |
|---------------------------|---------------------------------------------------------|
| 1 Data File Name          | Z:/ wang/ RW-III-215C_20130109_01/ _pslabel_02.fid/ fid |
| 2 Title                   |                                                         |
| 3 Origin                  | vnmrs                                                   |
| 4 Owner                   |                                                         |
| 5 Solvent                 | cdcl3                                                   |
| 6 Pulse Sequence          | s2pul                                                   |
| 7 Acquisition Date        | 2013-01-09T08:55:13                                     |
| 8 Modification Date       |                                                         |
| 9 Temperature             | 20.0                                                    |
| 10 Number of Scans        | 2000                                                    |
| 11 Spectrometer Frequency | 100.51                                                  |
| 12 Spectral Width         | 21186.4                                                 |
| 13 Lowest Frequency       | -1046.0                                                 |
| 14 Nucleus                | 13C                                                     |
| 15 Acquired Size          | 32768                                                   |
| 16 Spectral Size          | 65536                                                   |

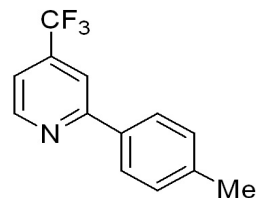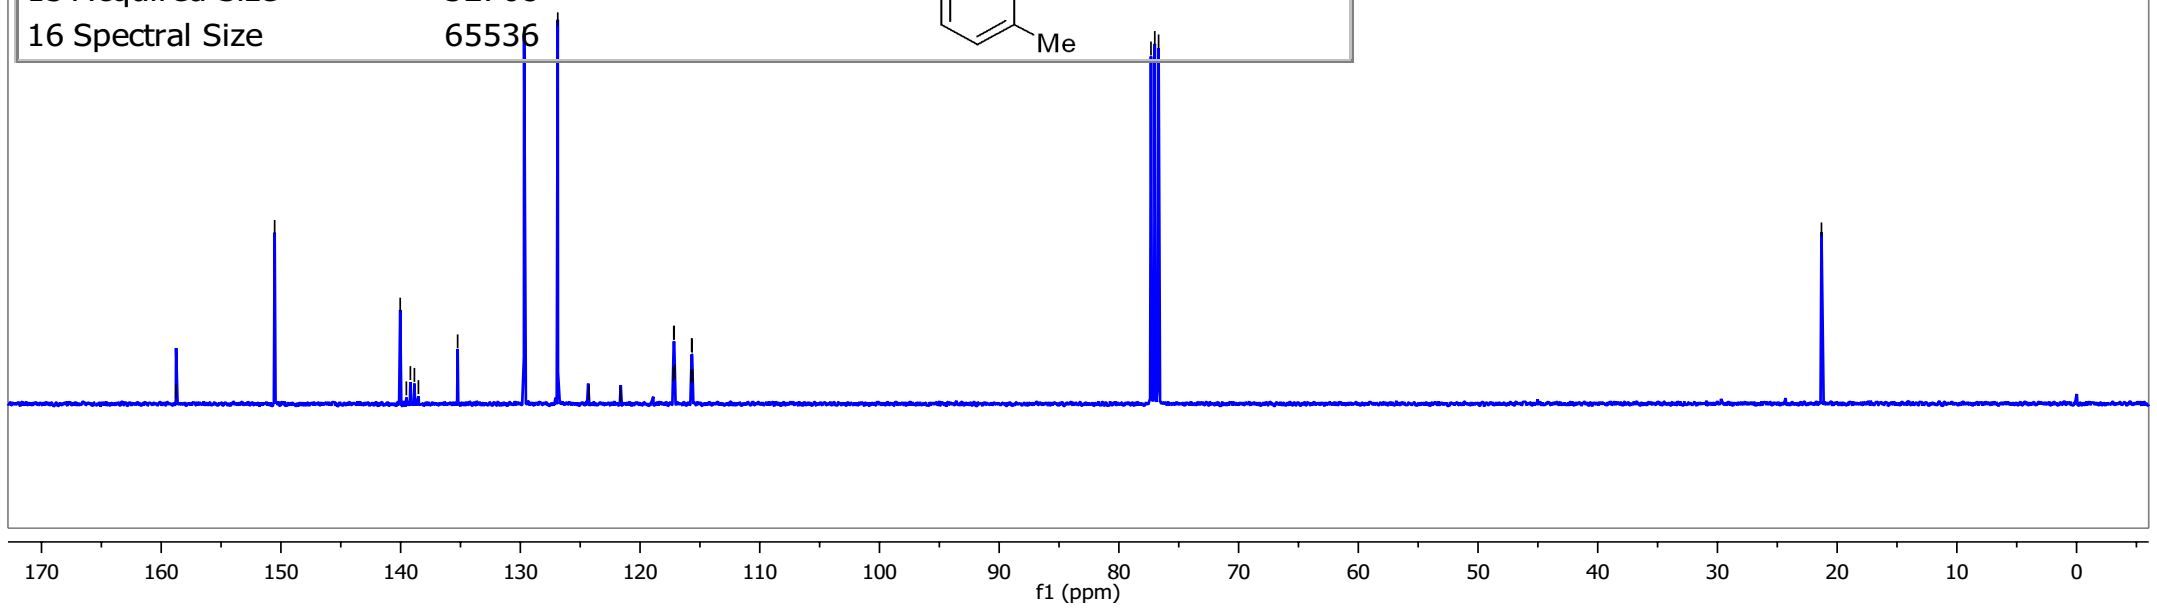

8.58  
8.57  
7.88  
7.86  
7.68  
7.29  
7.27  
7.26  
7.22  
7.21  
7.20  
7.20

2.47  
2.41  
1.36

| Parameter                 | Value                                                   |
|---------------------------|---------------------------------------------------------|
| 1 Data File Name          | Z:/ wang/ RW-III-227H_20130110_01/ _pslabel_01.fid/ fid |
| 2 Title                   |                                                         |
| 3 Origin                  | vnmrs                                                   |
| 4 Owner                   |                                                         |
| 5 Solvent                 | cdcl3                                                   |
| 6 Pulse Sequence          | s2pul                                                   |
| 7 Acquisition Date        | 2013-01-10T20:26:56                                     |
| 8 Modification Date       |                                                         |
| 9 Temperature             | 20.0                                                    |
| 10 Number of Scans        | 64                                                      |
| 11 Spectrometer Frequency | 399.67                                                  |
| 12 Spectral Width         | 6410.3                                                  |
| 13 Lowest Frequency       | -807.1                                                  |
| 14 Nucleus                | 1H                                                      |
| 15 Acquired Size          | 16384                                                   |
| 16 Spectral Size          | 32768                                                   |

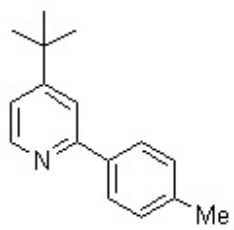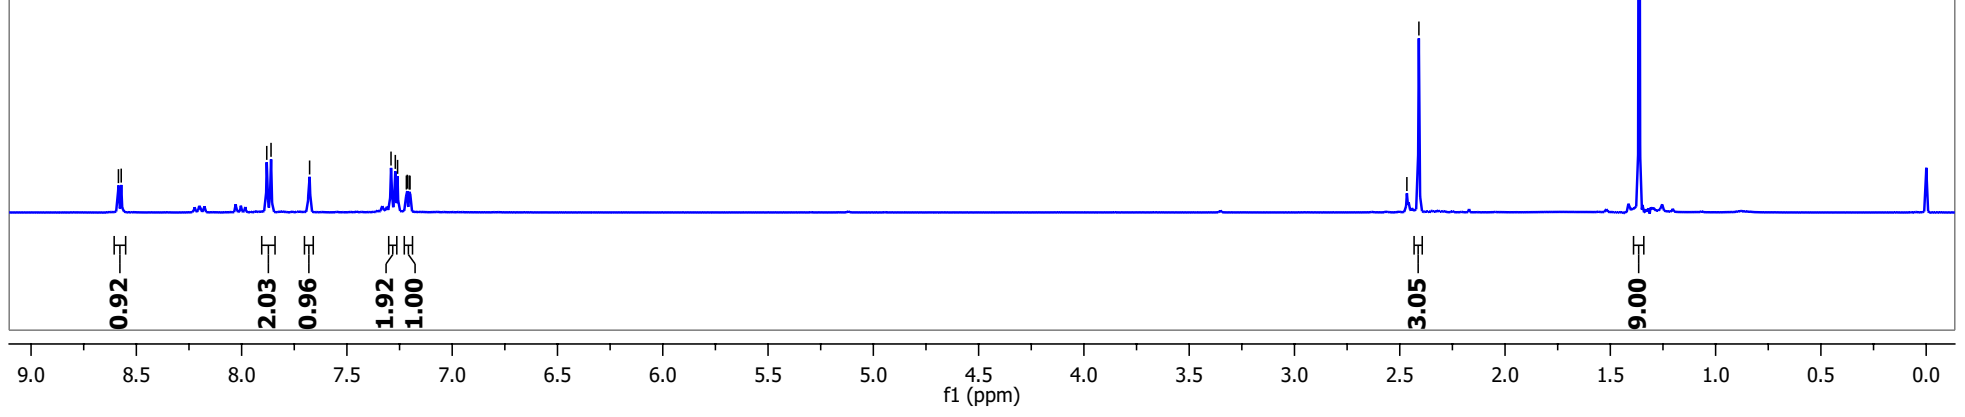

160.36  
157.55

149.00

138.69  
137.23

129.27  
126.92

119.17  
117.45

34.83

30.35

21.13

| Parameter                 | Value                                                   |
|---------------------------|---------------------------------------------------------|
| 1 Data File Name          | Z:/ wang/ RW-III-227C_20130110_01/ _pslabel_01.fid/ fid |
| 2 Title                   |                                                         |
| 3 Origin                  | vnmrs                                                   |
| 4 Owner                   |                                                         |
| 5 Solvent                 | cdcl3                                                   |
| 6 Pulse Sequence          | s2pul                                                   |
| 7 Acquisition Date        | 2013-01-10T20:47:16                                     |
| 8 Modification Date       |                                                         |
| 9 Temperature             | 20.0                                                    |
| 10 Number of Scans        | 600                                                     |
| 11 Spectrometer Frequency | 100.51                                                  |
| 12 Spectral Width         | 21186.4                                                 |
| 13 Lowest Frequency       | -1046.0                                                 |
| 14 Nucleus                | 13C                                                     |
| 15 Acquired Size          | 32768                                                   |
| 16 Spectral Size          | 65536                                                   |

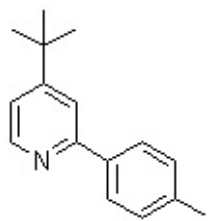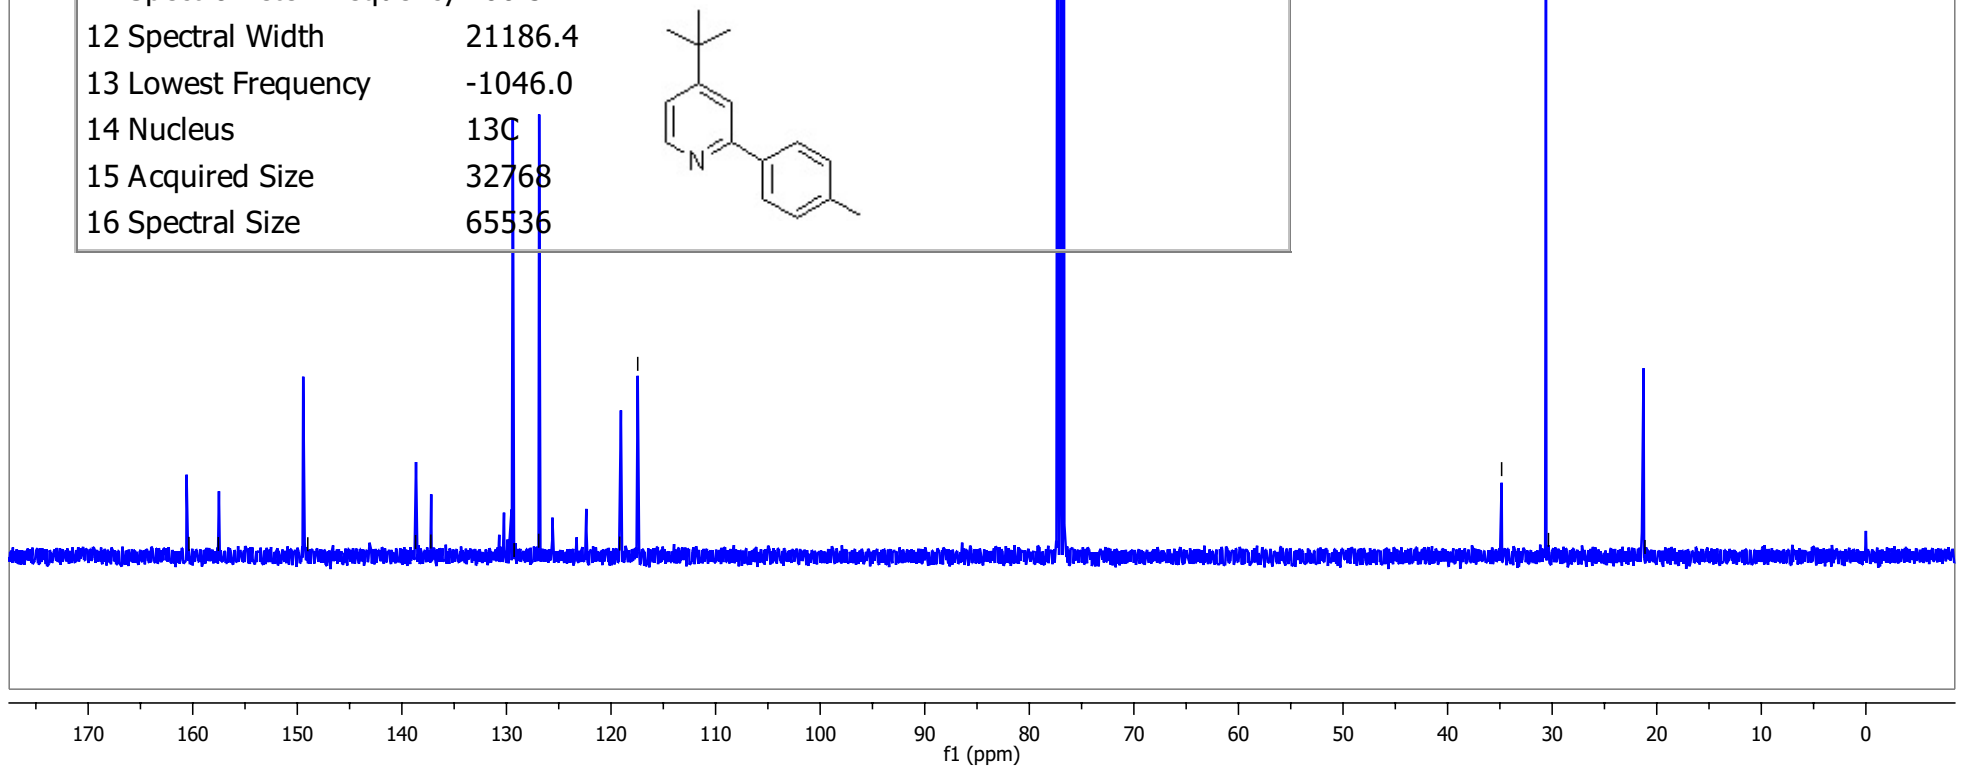

8.86  
8.86  
8.85  
8.85  
8.06  
8.05  
8.04  
7.83  
7.36  
7.35  
7.34  
7.33  
7.26

2.43

| Parameter                 | Value                                                     |
|---------------------------|-----------------------------------------------------------|
| 1 Data File Name          | Z:/ wang/ RW-III-163-1H_20121222_01/ _pslabel_01.fid/ fid |
| 2 Title                   |                                                           |
| 3 Origin                  | vnmrs                                                     |
| 4 Owner                   |                                                           |
| 5 Solvent                 | cdcl3                                                     |
| 6 Pulse Sequence          | s2pul                                                     |
| 7 Acquisition Date        | 2012-12-22T21:10:55                                       |
| 8 Modification Date       |                                                           |
| 9 Temperature             | 20.0                                                      |
| 10 Number of Scans        | 32                                                        |
| 11 Spectrometer Frequency | 399.67                                                    |
| 12 Spectral Width         | 6410.3                                                    |
| 13 Lowest Frequency       | -807.1                                                    |
| 14 Nucleus                | 1H                                                        |
| 15 Acquired Size          | 16384                                                     |
| 16 Spectral Size          | 32768                                                     |

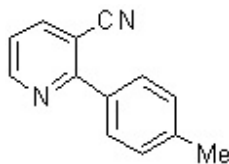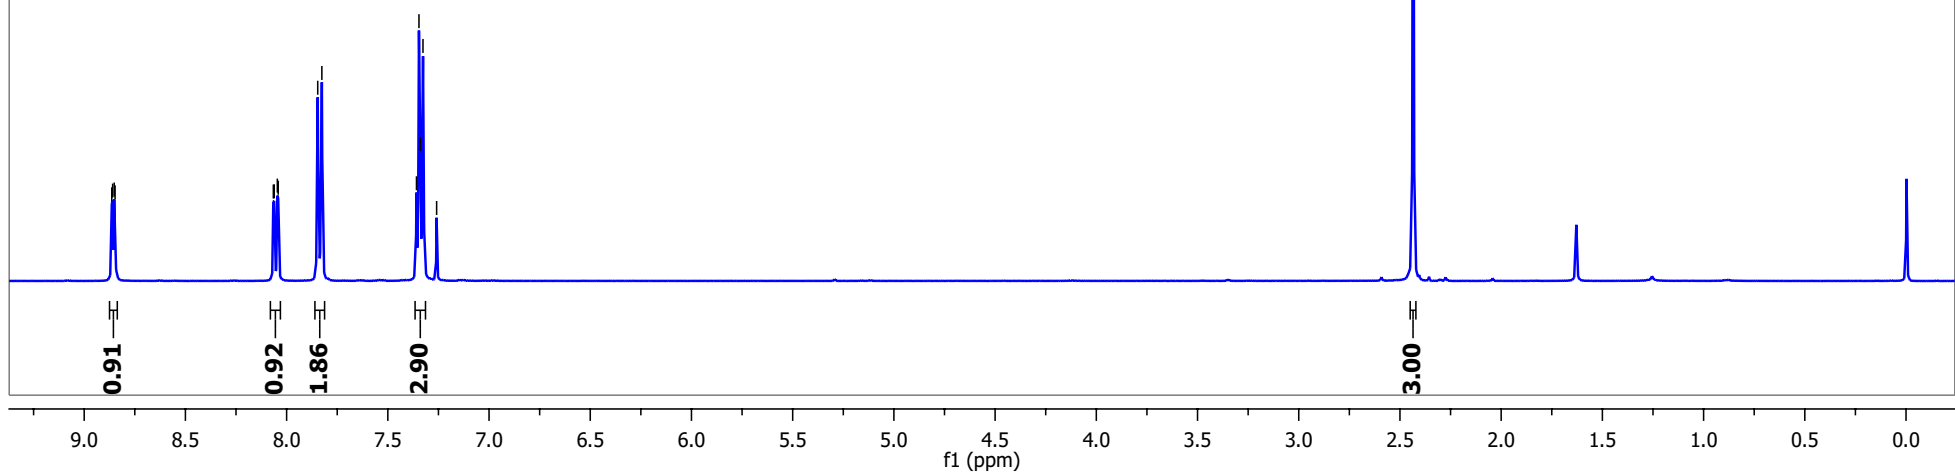

— 161.04      — 152.60      — 141.82      — 140.53      — 134.35      — 129.42      — 128.77      — 121.24      — 117.84      — 107.21      — 77.34      — 77.02      — 76.71      — 21.42      — 0.00

| Parameter                 | Value                                                     |
|---------------------------|-----------------------------------------------------------|
| 1 Data File Name          | Z:/ wang/ RW-III-163-1C_20121222_01/ _pslabel_01.fid/ fid |
| 2 Title                   |                                                           |
| 3 Origin                  | vnmrs                                                     |
| 4 Owner                   |                                                           |
| 5 Solvent                 | cdcl3                                                     |
| 6 Pulse Sequence          | s2pul                                                     |
| 7 Acquisition Date        | 2012-12-23T02:38:10                                       |
| 8 Modification Date       |                                                           |
| 9 Temperature             | 20.0                                                      |
| 10 Number of Scans        | 5000                                                      |
| 11 Spectrometer Frequency | 100.51                                                    |
| 12 Spectral Width         | 21186.4                                                   |
| 13 Lowest Frequency       | -1046.0                                                   |
| 14 Nucleus                | <sup>13</sup> C                                           |
| 15 Acquired Size          | 32768                                                     |
| 16 Spectral Size          | 65536                                                     |

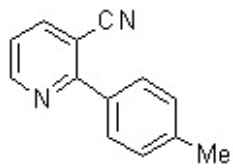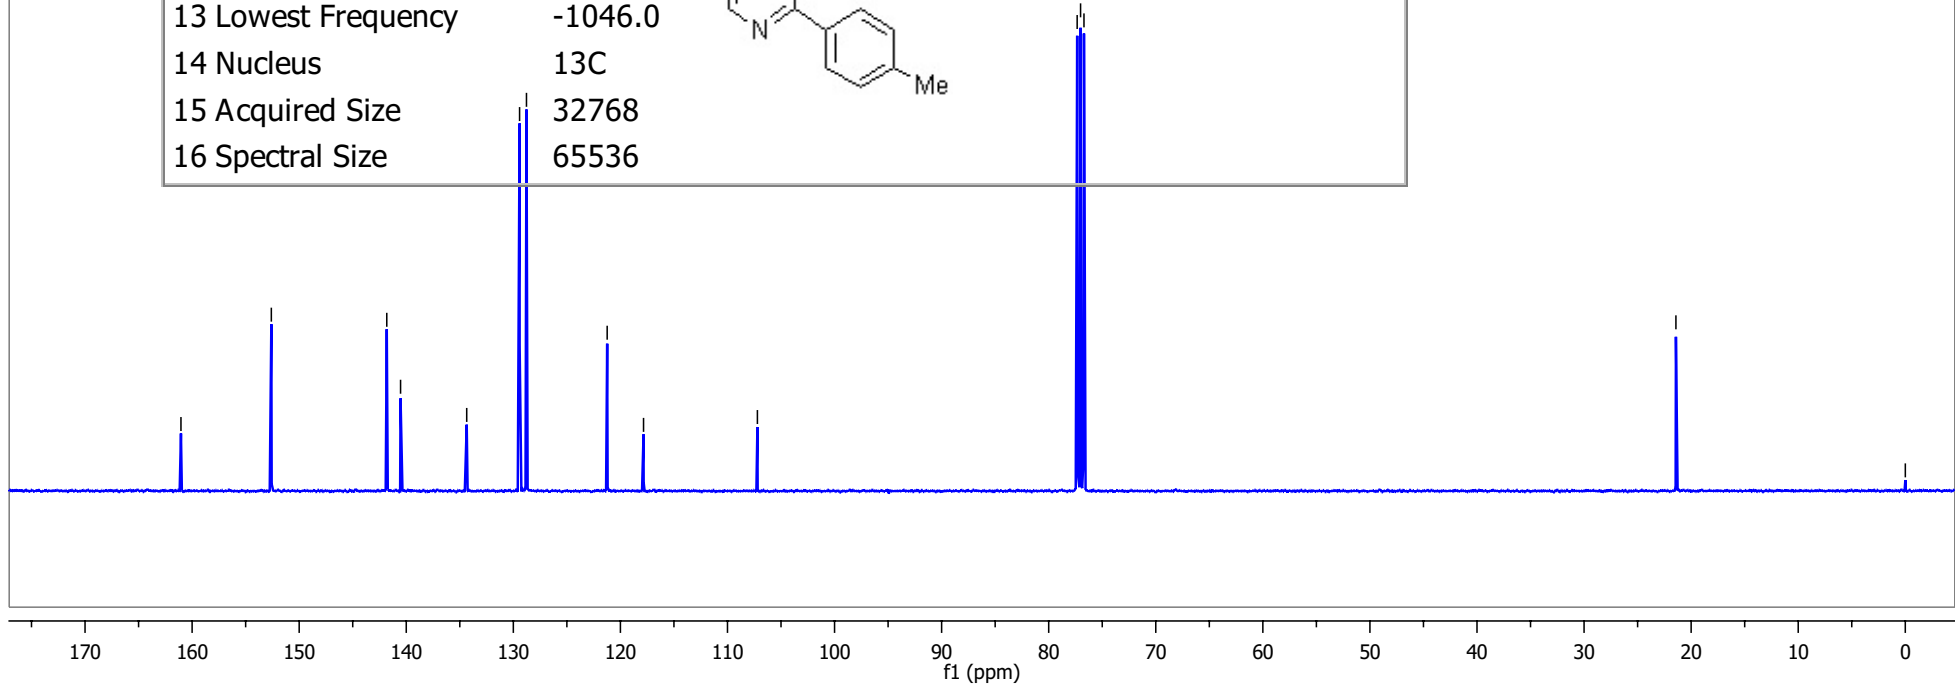

8.92  
8.78  
8.77

7.53  
7.51  
7.46  
7.45  
7.35  
7.33  
7.26

2.43

| Parameter                 | Value                                                     |
|---------------------------|-----------------------------------------------------------|
| 1 Data File Name          | Z:/ wang/ RW-III-163-3H_20121222_01/ _pslabel_01.fid/ fid |
| 2 Title                   |                                                           |
| 3 Origin                  | vnmrs                                                     |
| 4 Owner                   |                                                           |
| 5 Solvent                 | cdcl3                                                     |
| 6 Pulse Sequence          | s2pul                                                     |
| 7 Acquisition Date        | 2012-12-22T21:15:30                                       |
| 8 Modification Date       |                                                           |
| 9 Temperature             | 20.0                                                      |
| 10 Number of Scans        | 32                                                        |
| 11 Spectrometer Frequency | 399.67                                                    |
| 12 Spectral Width         | 6410.3                                                    |
| 13 Lowest Frequency       | -807.1                                                    |
| 14 Nucleus                | 1H                                                        |
| 15 Acquired Size          | 16384                                                     |
| 16 Spectral Size          | 32768                                                     |

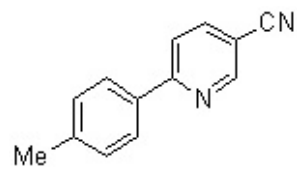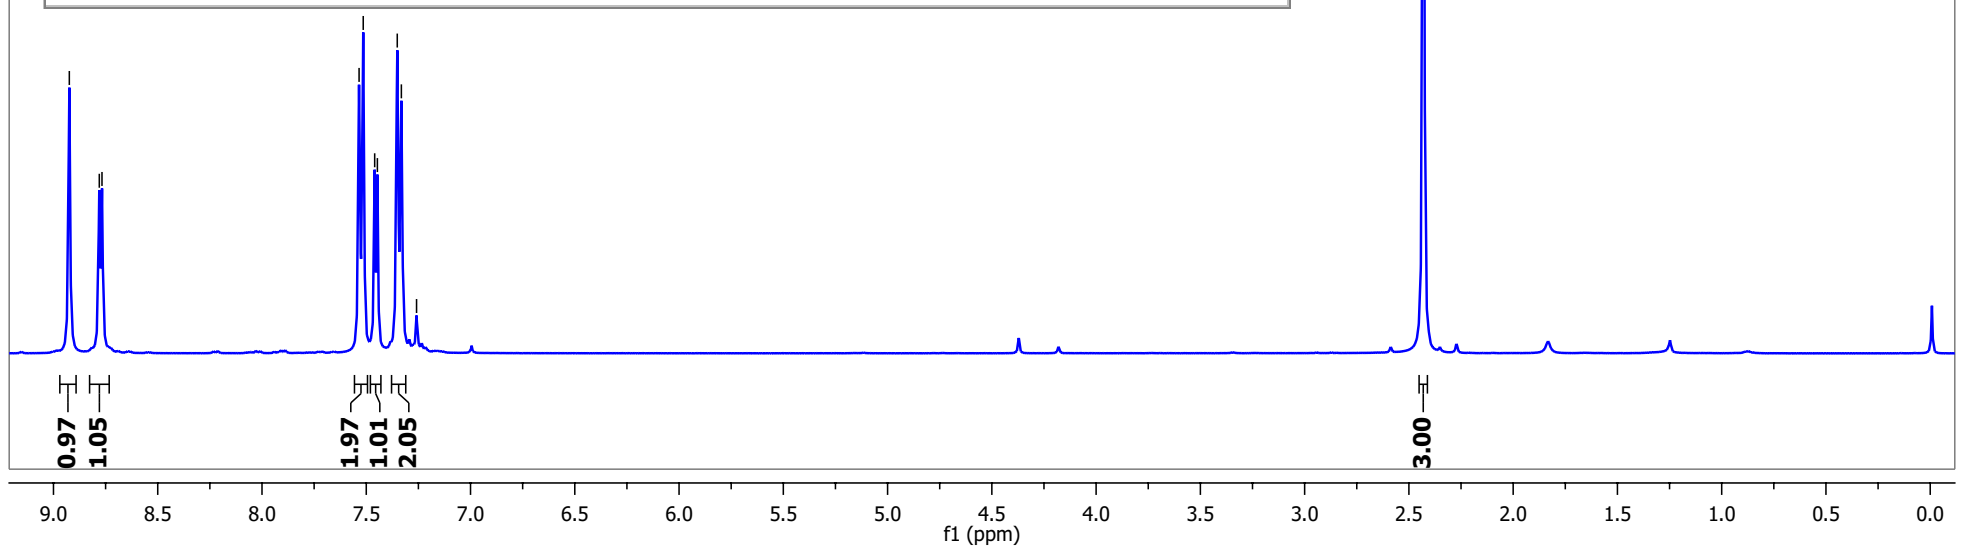

154.03  
152.72  
152.31

140.65

132.50  
129.90  
128.28

123.61

116.90

108.39

77.39  
77.07  
76.75

21.37

| Parameter                 | Value                                                     |
|---------------------------|-----------------------------------------------------------|
| 1 Data File Name          | Z:/ wang/ RW-III-163-3C_20121223_01/ _pslabel_01.fid/ fid |
| 2 Title                   |                                                           |
| 3 Origin                  | vnmrs                                                     |
| 4 Owner                   |                                                           |
| 5 Solvent                 | cdcl3                                                     |
| 6 Pulse Sequence          | s2pul                                                     |
| 7 Acquisition Date        | 2012-12-23T06:13:08                                       |
| 8 Modification Date       |                                                           |
| 9 Temperature             | 20.0                                                      |
| 10 Number of Scans        | 5000                                                      |
| 11 Spectrometer Frequency | 100.51                                                    |
| 12 Spectral Width         | 21186.4                                                   |
| 13 Lowest Frequency       | -1046.0                                                   |
| 14 Nucleus                | 13C                                                       |
| 15 Acquired Size          | 32768                                                     |
| 16 Spectral Size          | 65536                                                     |

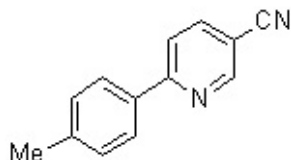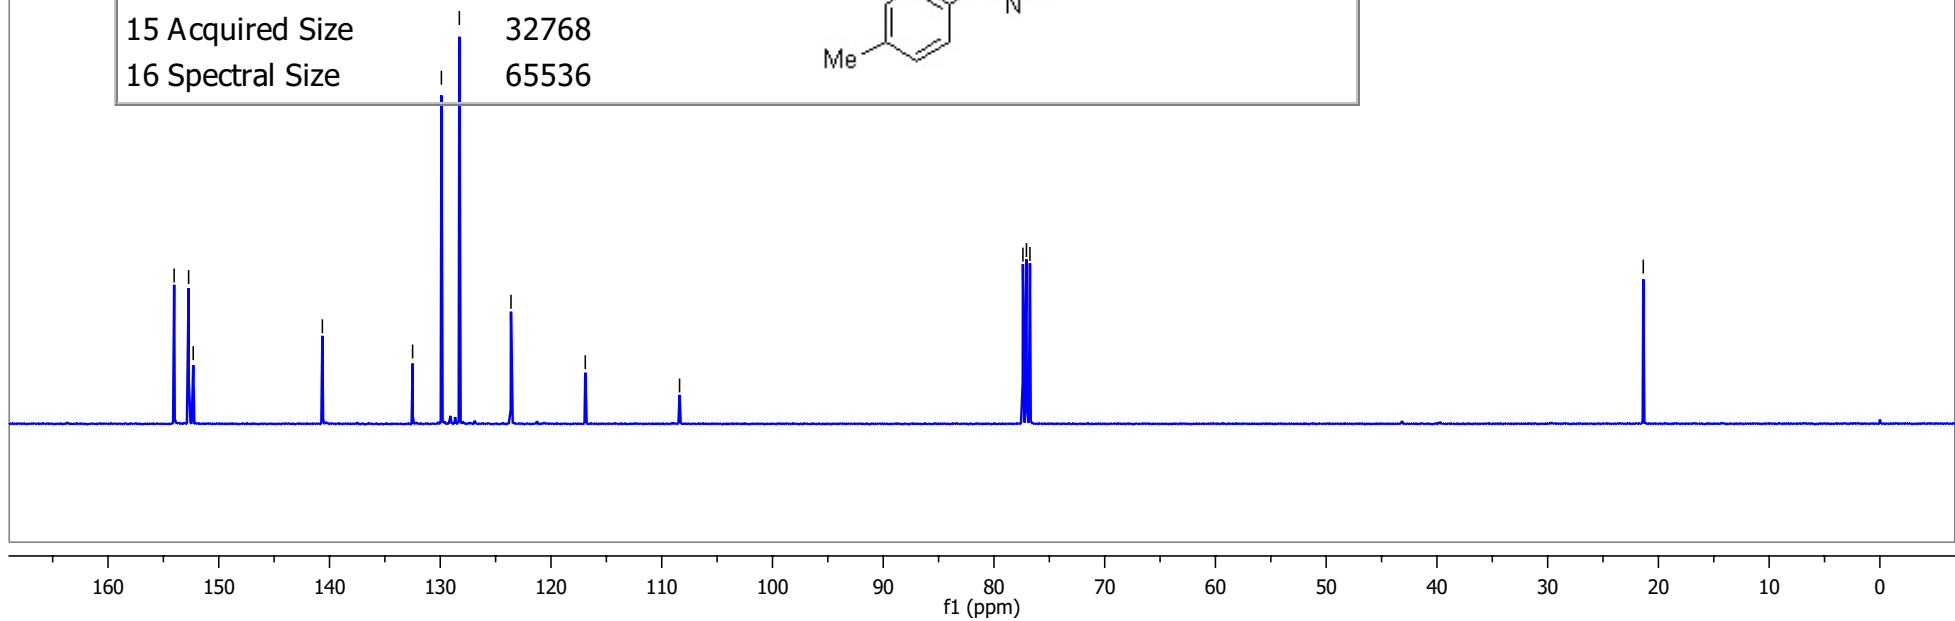

8.86  
8.86  
8.85  
8.84

8.06  
7.96  
7.94  
7.92

7.39  
7.37  
7.37  
7.35  
7.24  
7.23  
7.22  
7.21  
7.19  
7.19  
7.18

| Parameter                 | Value                                                    |
|---------------------------|----------------------------------------------------------|
| 1 Data File Name          | Z:/ wang/ RW-III-139-1_20121214_01/ _pslabel_01.fid/ fid |
| 2 Title                   |                                                          |
| 3 Origin                  | vnmrs                                                    |
| 4 Owner                   |                                                          |
| 5 Solvent                 | cdcl3                                                    |
| 6 Pulse Sequence          | s2pul                                                    |
| 7 Acquisition Date        | 2012-12-14T22:29:05                                      |
| 8 Modification Date       |                                                          |
| 9 Temperature             | 20.0                                                     |
| 10 Number of Scans        | 8                                                        |
| 11 Spectrometer Frequency | 399.67                                                   |
| 12 Spectral Width         | 6410.3                                                   |
| 13 Lowest Frequency       | -807.1                                                   |
| 14 Nucleus                | 1H                                                       |
| 15 Acquired Size          | 16384                                                    |
| 16 Spectral Size          | 32768                                                    |

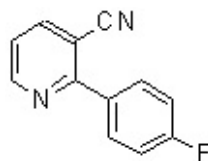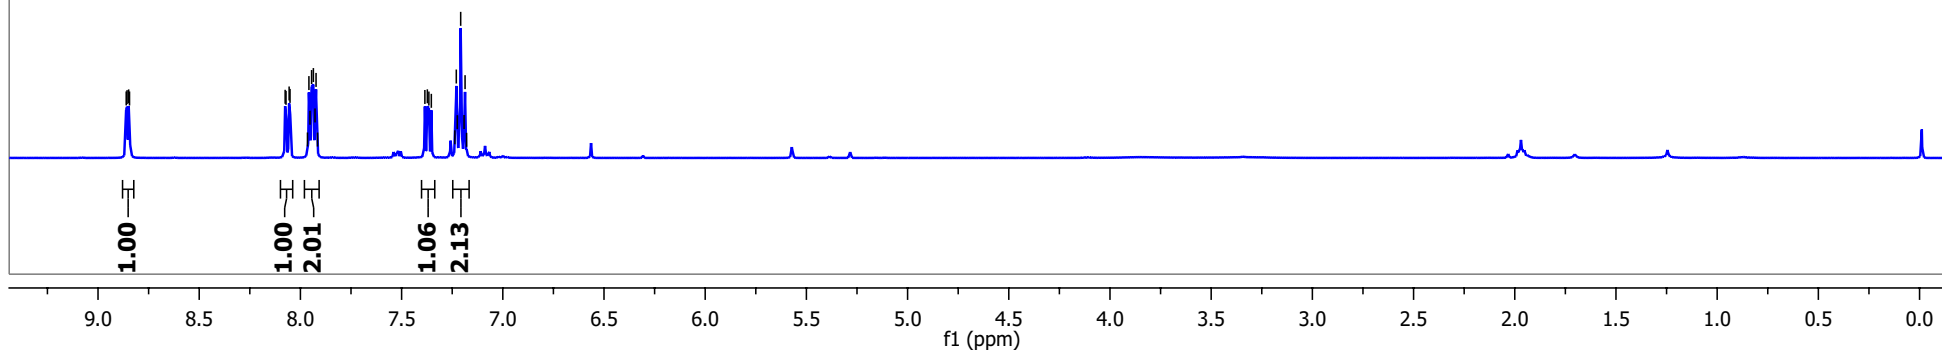



165.26  
 162.76  
 159.85  
 152.66  
 141.85  
 133.27  
 133.24  
 131.05  
 130.96  
 121.60  
 117.56  
 115.92  
 115.70  
 107.29  
 77.37  
 77.05  
 76.73

| Parameter                 | Value                                                    |
|---------------------------|----------------------------------------------------------|
| 1 Data File Name          | Z:/ wang/ RW-III-139-1_20121214_01/ _pslabel_02.fid/ fid |
| 2 Title                   |                                                          |
| 3 Origin                  | vnmrs                                                    |
| 4 Owner                   |                                                          |
| 5 Solvent                 | cdcl3                                                    |
| 6 Pulse Sequence          | s2pul                                                    |
| 7 Acquisition Date        | 2012-12-15T00:03:30                                      |
| 8 Modification Date       |                                                          |
| 9 Temperature             | 20.0                                                     |
| 10 Number of Scans        | 5000                                                     |
| 11 Spectrometer Frequency | 100.51                                                   |
| 12 Spectral Width         | 21186.4                                                  |
| 13 Lowest Frequency       | -1046.0                                                  |
| 14 Nucleus                | <sup>13</sup> C                                          |
| 15 Acquired Size          | 32768                                                    |
| 16 Spectral Size          | 65536                                                    |

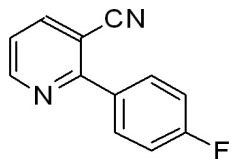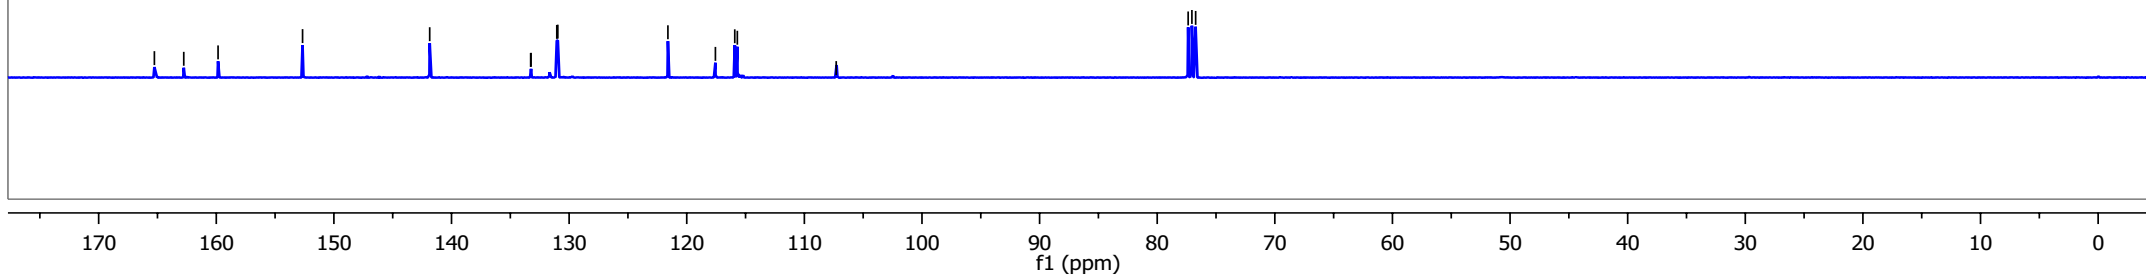

8.94  
8.81  
8.80

7.61  
7.60  
7.60  
7.59  
7.45  
7.44

7.26  
7.25  
7.25  
7.23  
7.22  
7.21  
7.20

| Parameter                 | Value                                                    |
|---------------------------|----------------------------------------------------------|
| 1 Data File Name          | Z:/ wang/ RW-III-139-3_20121214_01/ _pslabel_01.fid/ fid |
| 2 Title                   |                                                          |
| 3 Origin                  | vnmrs                                                    |
| 4 Owner                   |                                                          |
| 5 Solvent                 | cddcl3                                                   |
| 6 Pulse Sequence          | s2pul                                                    |
| 7 Acquisition Date        | 2012-12-14T22:32:30                                      |
| 8 Modification Date       |                                                          |
| 9 Temperature             | 20.0                                                     |
| 10 Number of Scans        | 8                                                        |
| 11 Spectrometer Frequency | 399.67                                                   |
| 12 Spectral Width         | 6410.3                                                   |
| 13 Lowest Frequency       | -807.1                                                   |
| 14 Nucleus                | 1H                                                       |
| 15 Acquired Size          | 16384                                                    |
| 16 Spectral Size          | 32768                                                    |

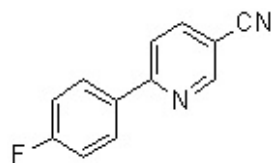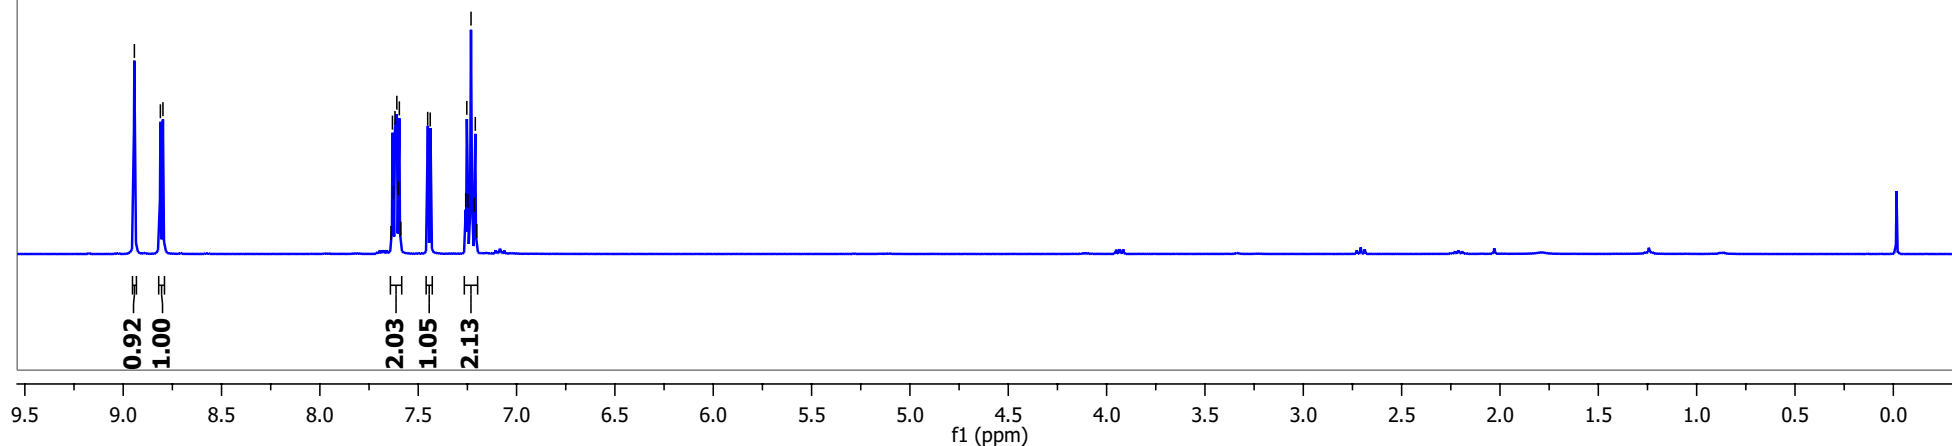

165.18  
162.68

154.03  
152.91  
151.20

131.45  
131.42  
130.49  
130.40

123.61

116.57  
116.54  
116.32

108.45

77.36  
77.04  
76.72

| Parameter                 | Value                                                    |
|---------------------------|----------------------------------------------------------|
| 1 Data File Name          | Z:/ wang/ RW-III-139-3_20121214_01/ _pslabel_02.fid/ fid |
| 2 Title                   |                                                          |
| 3 Origin                  | vnmrs                                                    |
| 4 Owner                   |                                                          |
| 5 Solvent                 | cdcl3                                                    |
| 6 Pulse Sequence          | s2pul                                                    |
| 7 Acquisition Date        | 2012-12-15T03:38:49                                      |
| 8 Modification Date       |                                                          |
| 9 Temperature             | 20.0                                                     |
| 10 Number of Scans        | 5000                                                     |
| 11 Spectrometer Frequency | 100.51                                                   |
| 12 Spectral Width         | 21186.4                                                  |
| 13 Lowest Frequency       | -1046.0                                                  |
| 14 Nucleus                | 13C                                                      |
| 15 Acquired Size          | 32768                                                    |
| 16 Spectral Size          | 65536                                                    |

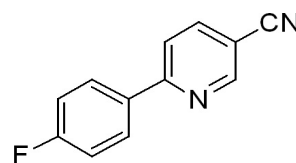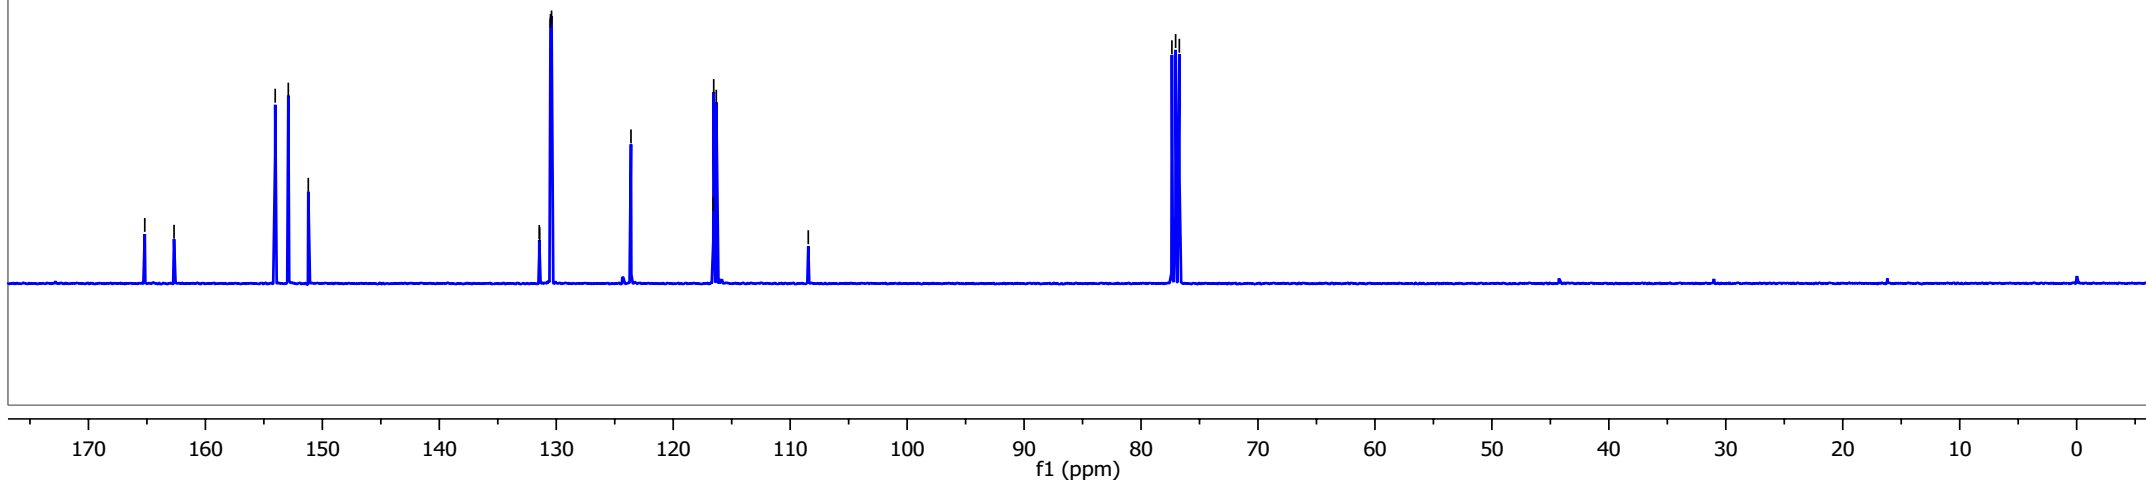

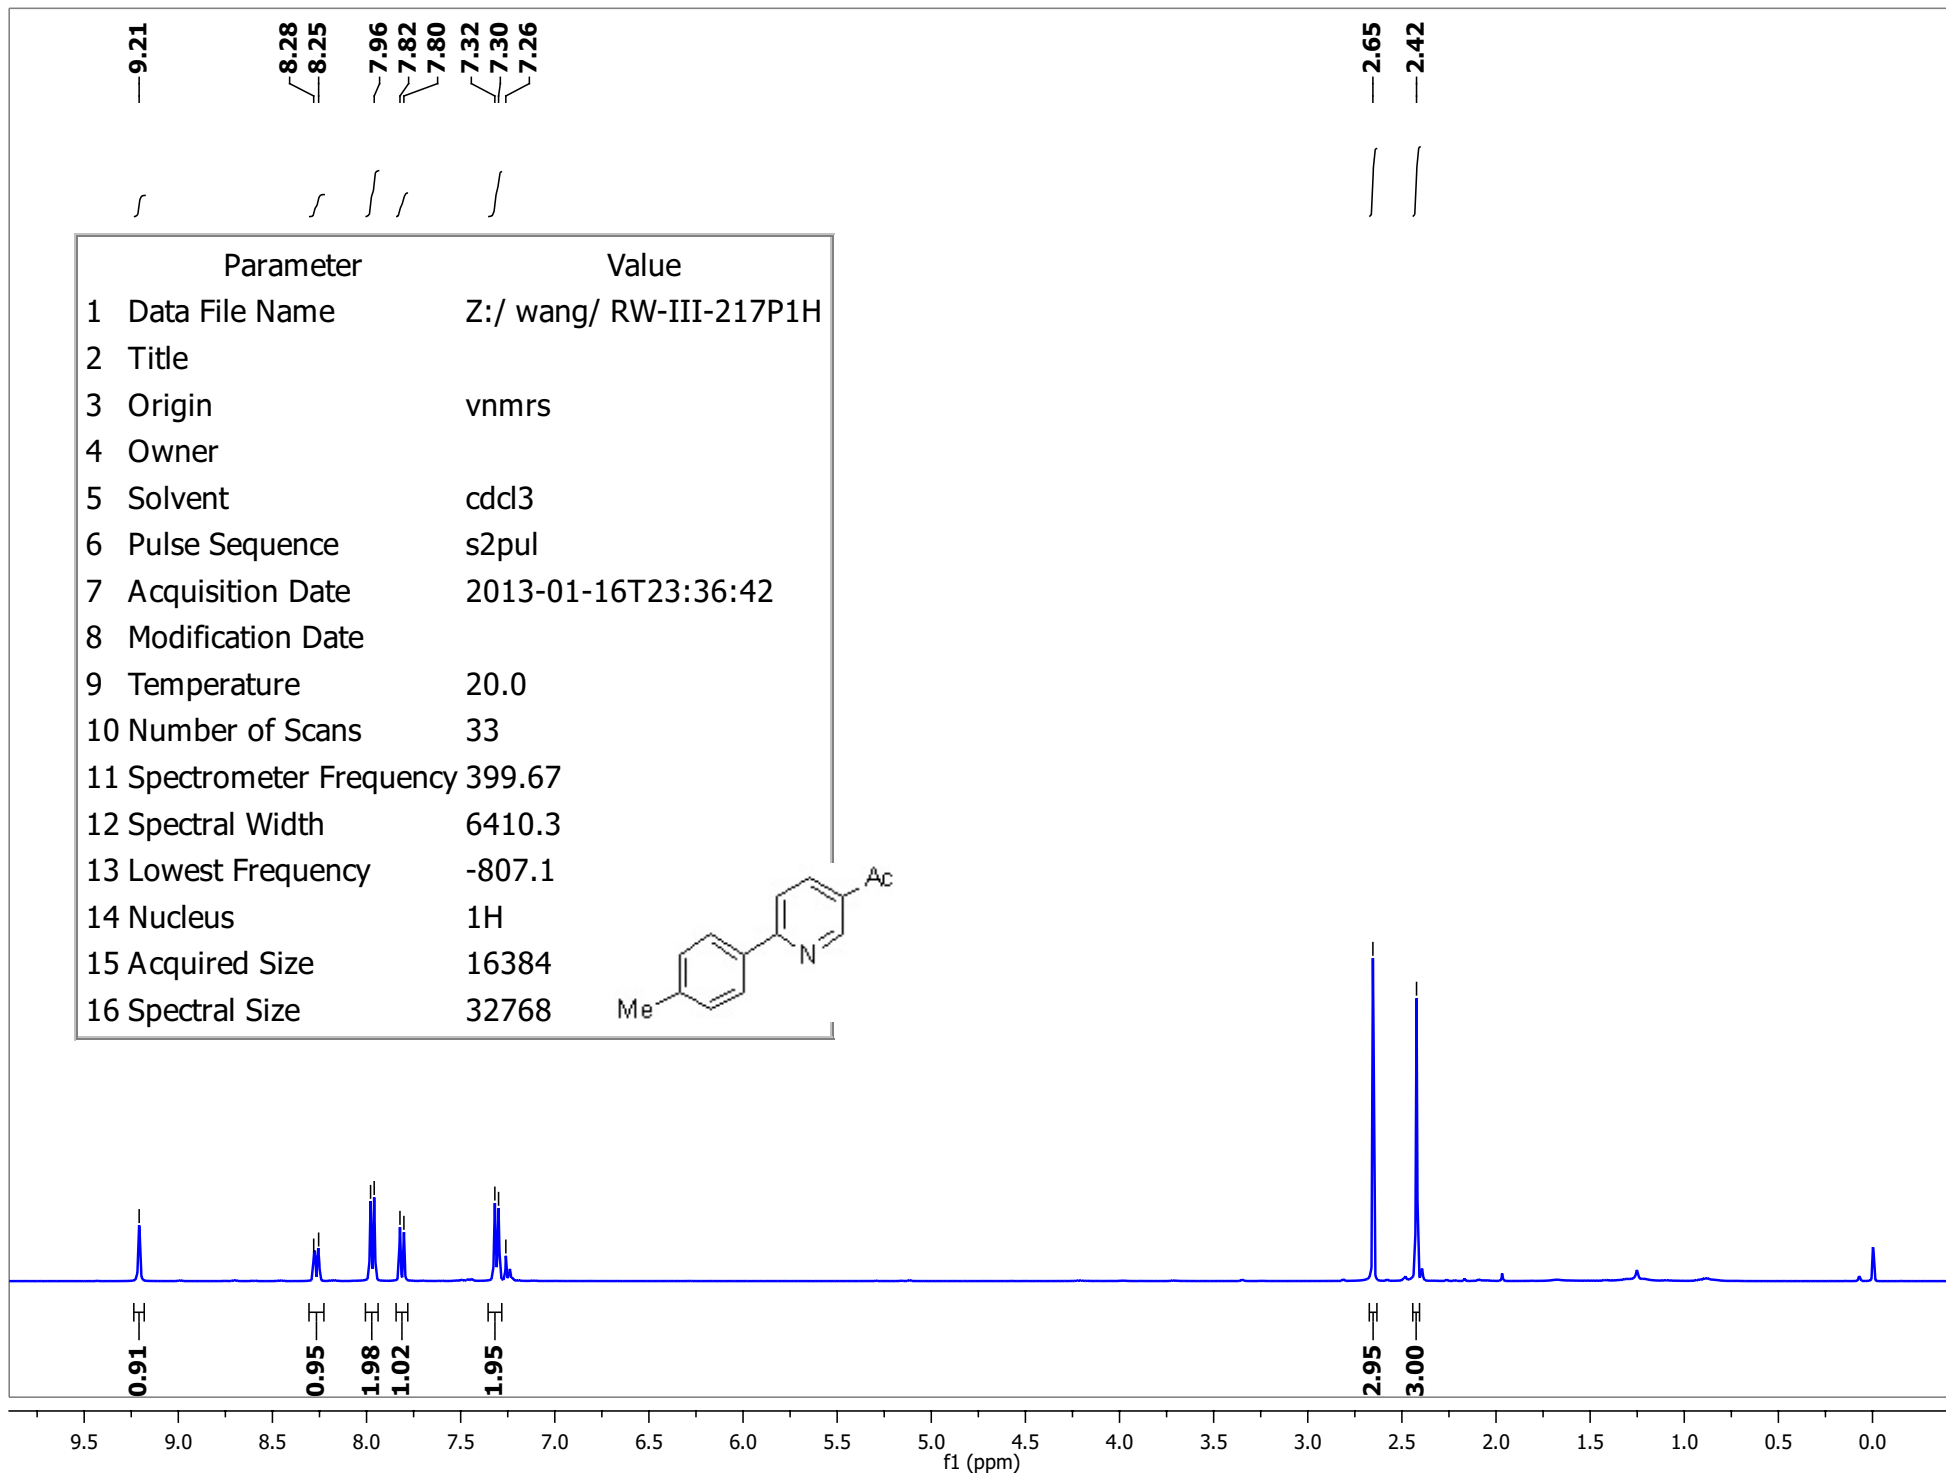

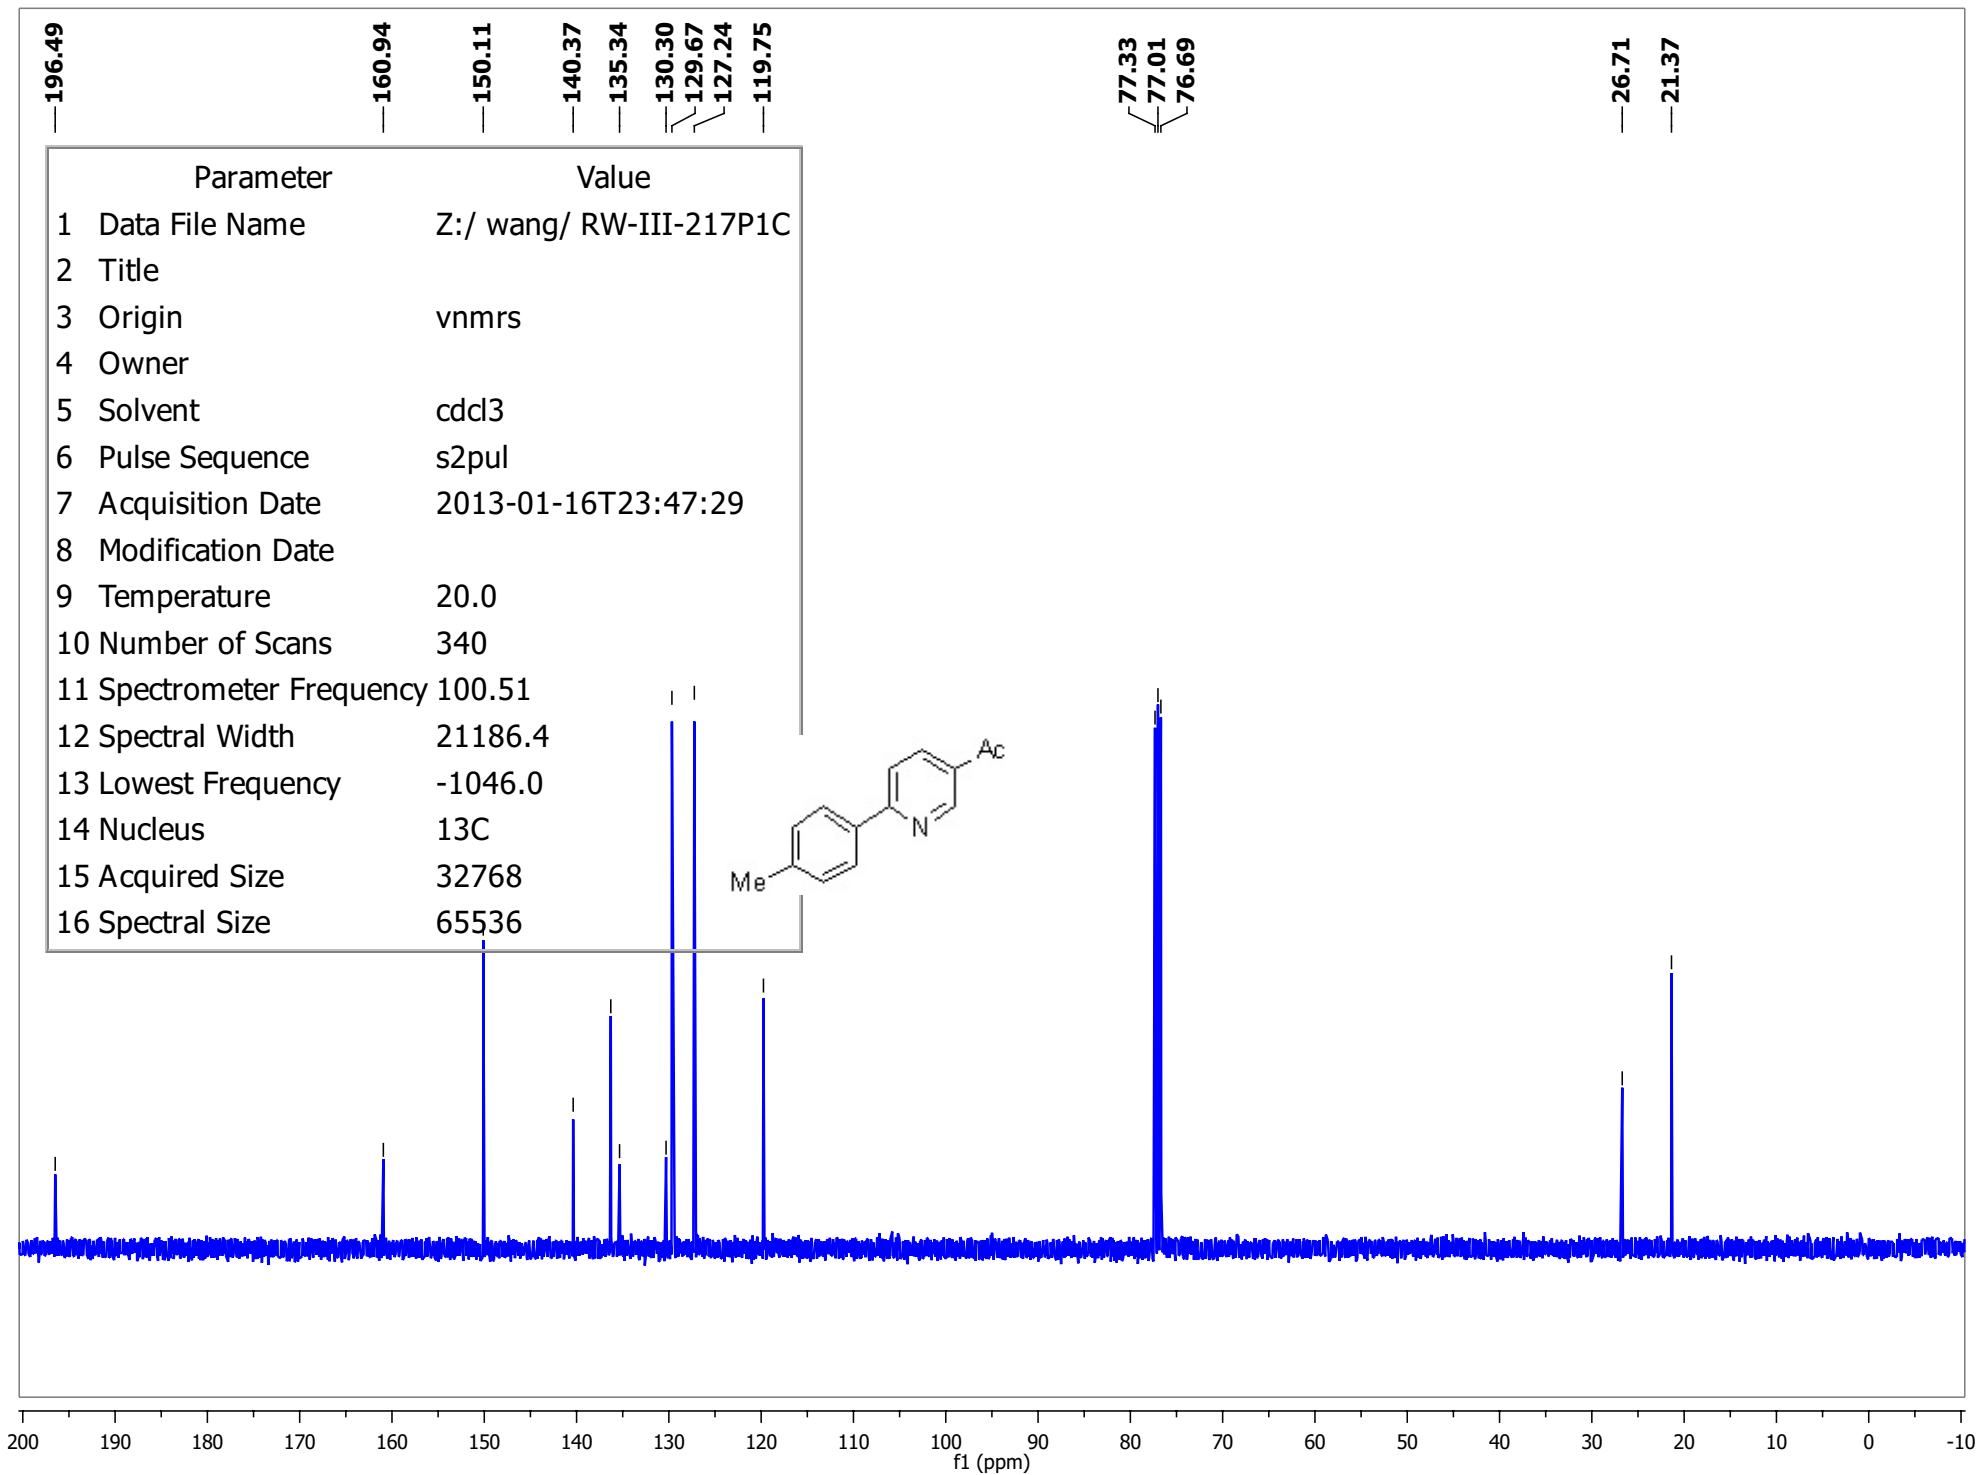

| Parameter                 | Value                   |
|---------------------------|-------------------------|
| 1 Data File Name          | Z:/ wang/ RW-III-217P1C |
| 2 Title                   |                         |
| 3 Origin                  | vnmrs                   |
| 4 Owner                   |                         |
| 5 Solvent                 | cdd3                    |
| 6 Pulse Sequence          | s2pul                   |
| 7 Acquisition Date        | 2013-01-16T23:47:29     |
| 8 Modification Date       |                         |
| 9 Temperature             | 20.0                    |
| 10 Number of Scans        | 340                     |
| 11 Spectrometer Frequency | 100.51                  |
| 12 Spectral Width         | 21186.4                 |
| 13 Lowest Frequency       | -1046.0                 |
| 14 Nucleus                | 13C                     |
| 15 Acquired Size          | 32768                   |
| 16 Spectral Size          | 65536                   |

8.75  
8.74

7.84  
7.82

7.47  
7.45

7.33  
7.32

7.31  
7.30

7.28  
7.26

2.41

2.07

| Parameter                 | Value                   |
|---------------------------|-------------------------|
| 1 Data File Name          | Z:/ wang/ RW-III-217P2H |
| 2 Title                   |                         |
| 3 Origin                  | vnmrs                   |
| 4 Owner                   |                         |
| 5 Solvent                 | cdcl3                   |
| 6 Pulse Sequence          | s2pul                   |
| 7 Acquisition Date        | 2013-01-16T23:41:22     |
| 8 Modification Date       |                         |
| 9 Temperature             | 20.0                    |
| 10 Number of Scans        | 33                      |
| 11 Spectrometer Frequency | 399.67                  |
| 12 Spectral Width         | 6410.3                  |
| 13 Lowest Frequency       | -807.1                  |
| 14 Nucleus                | 1H                      |
| 15 Acquired Size          | 16384                   |
| 16 Spectral Size          | 32768                   |

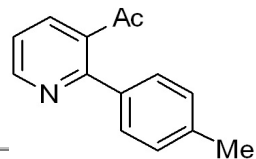

0.95

0.95

1.95

1.08

2.17

3.14

3.00

9.5 9.0 8.5 8.0 7.5 7.0 6.5 6.0 5.5 5.0 4.5 4.0 3.5 3.0 2.5 2.0 1.5 1.0 0.5 0.0 -0.5  
f1 (ppm)

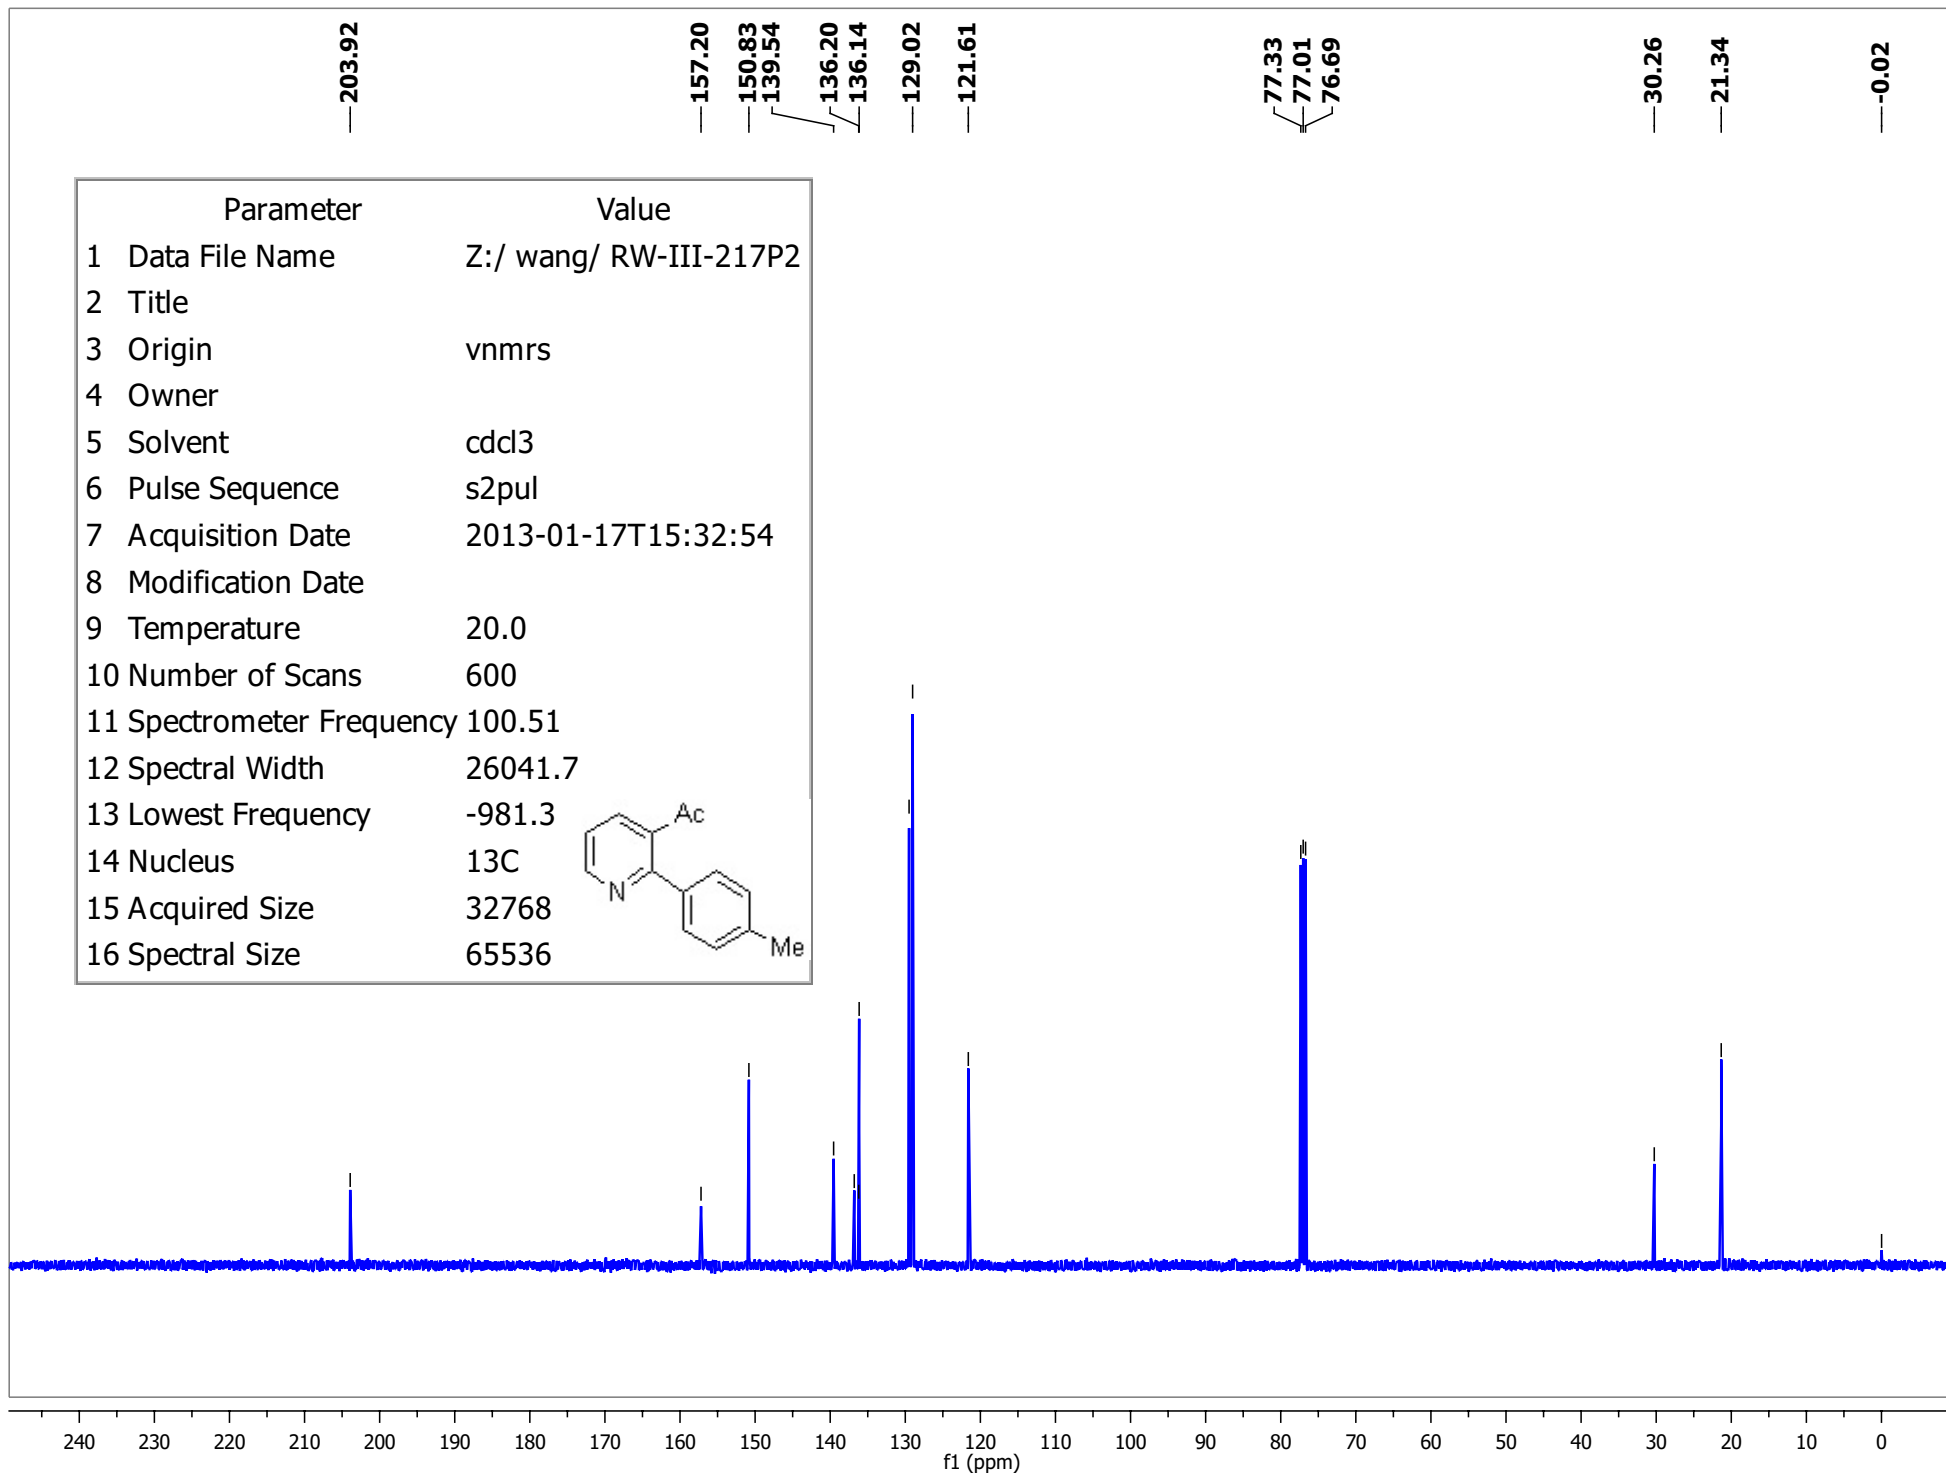

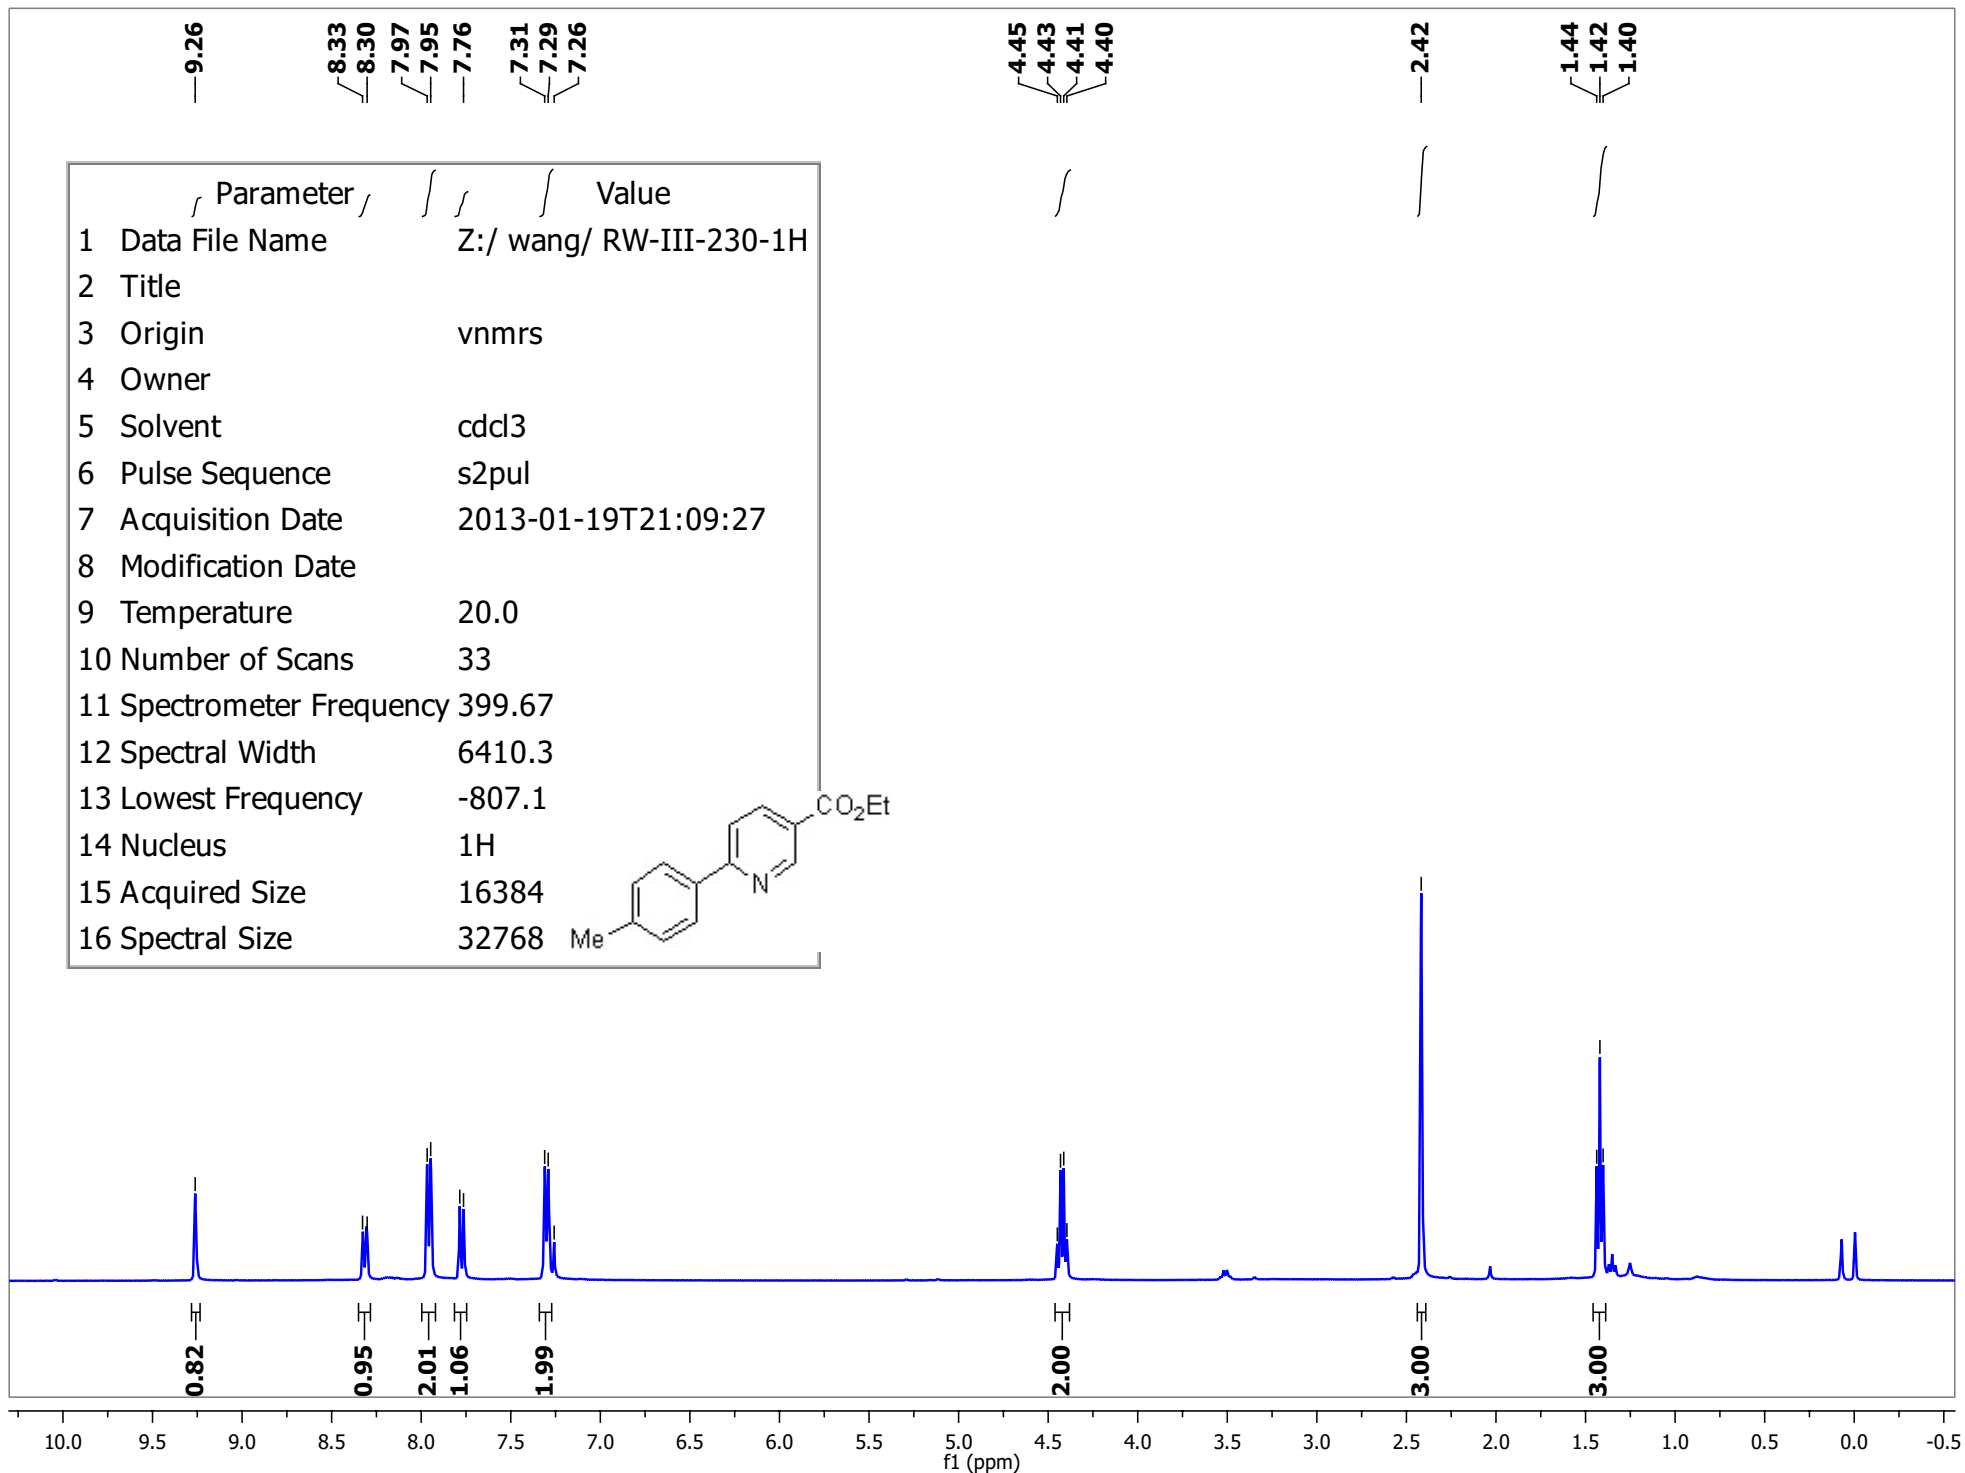

| Parameter                 | Value                   |
|---------------------------|-------------------------|
| 1 Data File Name          | Z:/ wang/ RW-III-230-1H |
| 2 Title                   |                         |
| 3 Origin                  | vnmrs                   |
| 4 Owner                   |                         |
| 5 Solvent                 | cdcl3                   |
| 6 Pulse Sequence          | s2pul                   |
| 7 Acquisition Date        | 2013-01-19T21:09:27     |
| 8 Modification Date       |                         |
| 9 Temperature             | 20.0                    |
| 10 Number of Scans        | 33                      |
| 11 Spectrometer Frequency | 399.67                  |
| 12 Spectral Width         | 6410.3                  |
| 13 Lowest Frequency       | -807.1                  |
| 14 Nucleus                | 1H                      |
| 15 Acquired Size          | 16384                   |
| 16 Spectral Size          | 32768                   |



165.45  
160.79  
150.90  
140.15  
137.74  
135.50  
129.61  
127.21  
124.14  
119.42

77.33  
77.01  
76.69

61.26

21.35

14.30

| Parameter                 | Value                   |
|---------------------------|-------------------------|
| 1 Data File Name          | Z:/ wang/ RW-III-230-1C |
| 2 Title                   |                         |
| 3 Origin                  | vnMrs                   |
| 4 Owner                   |                         |
| 5 Solvent                 | cdCl3                   |
| 6 Pulse Sequence          | s2pul                   |
| 7 Acquisition Date        | 2013-01-19T21:20:30     |
| 8 Modification Date       |                         |
| 9 Temperature             | 20.0                    |
| 10 Number of Scans        | 588                     |
| 11 Spectrometer Frequency | 100.51                  |
| 12 Spectral Width         | 25510.2                 |
| 13 Lowest Frequency       | -966.7                  |
| 14 Nucleus                | 13C                     |
| 15 Acquired Size          | 32768                   |
| 16 Spectral Size          | 65536                   |

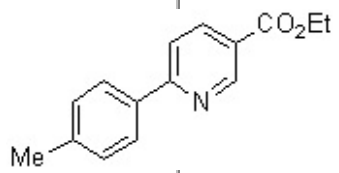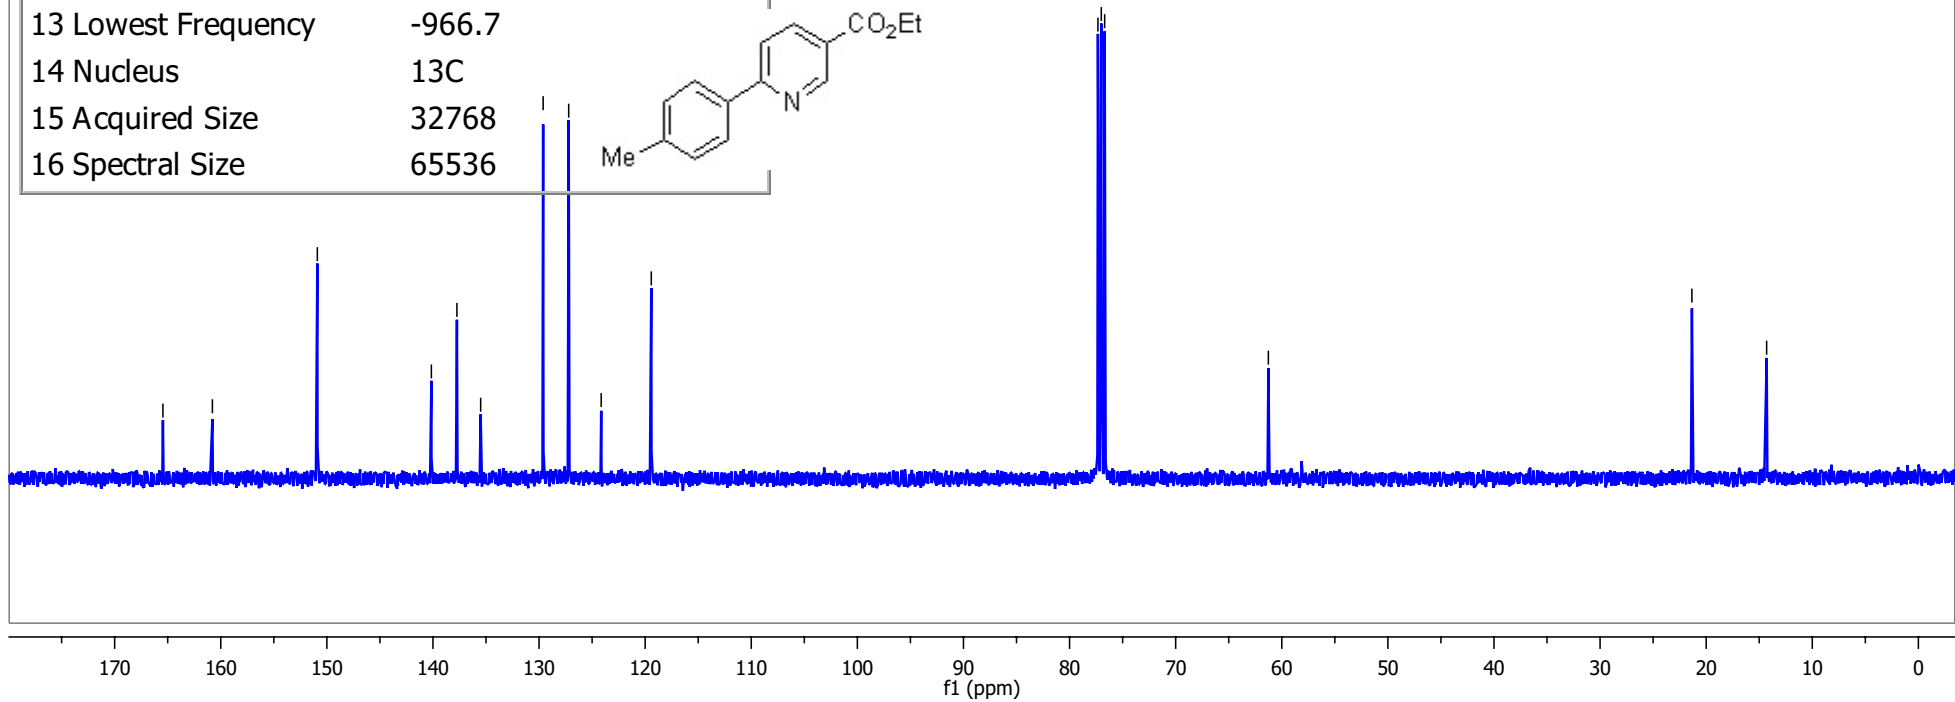

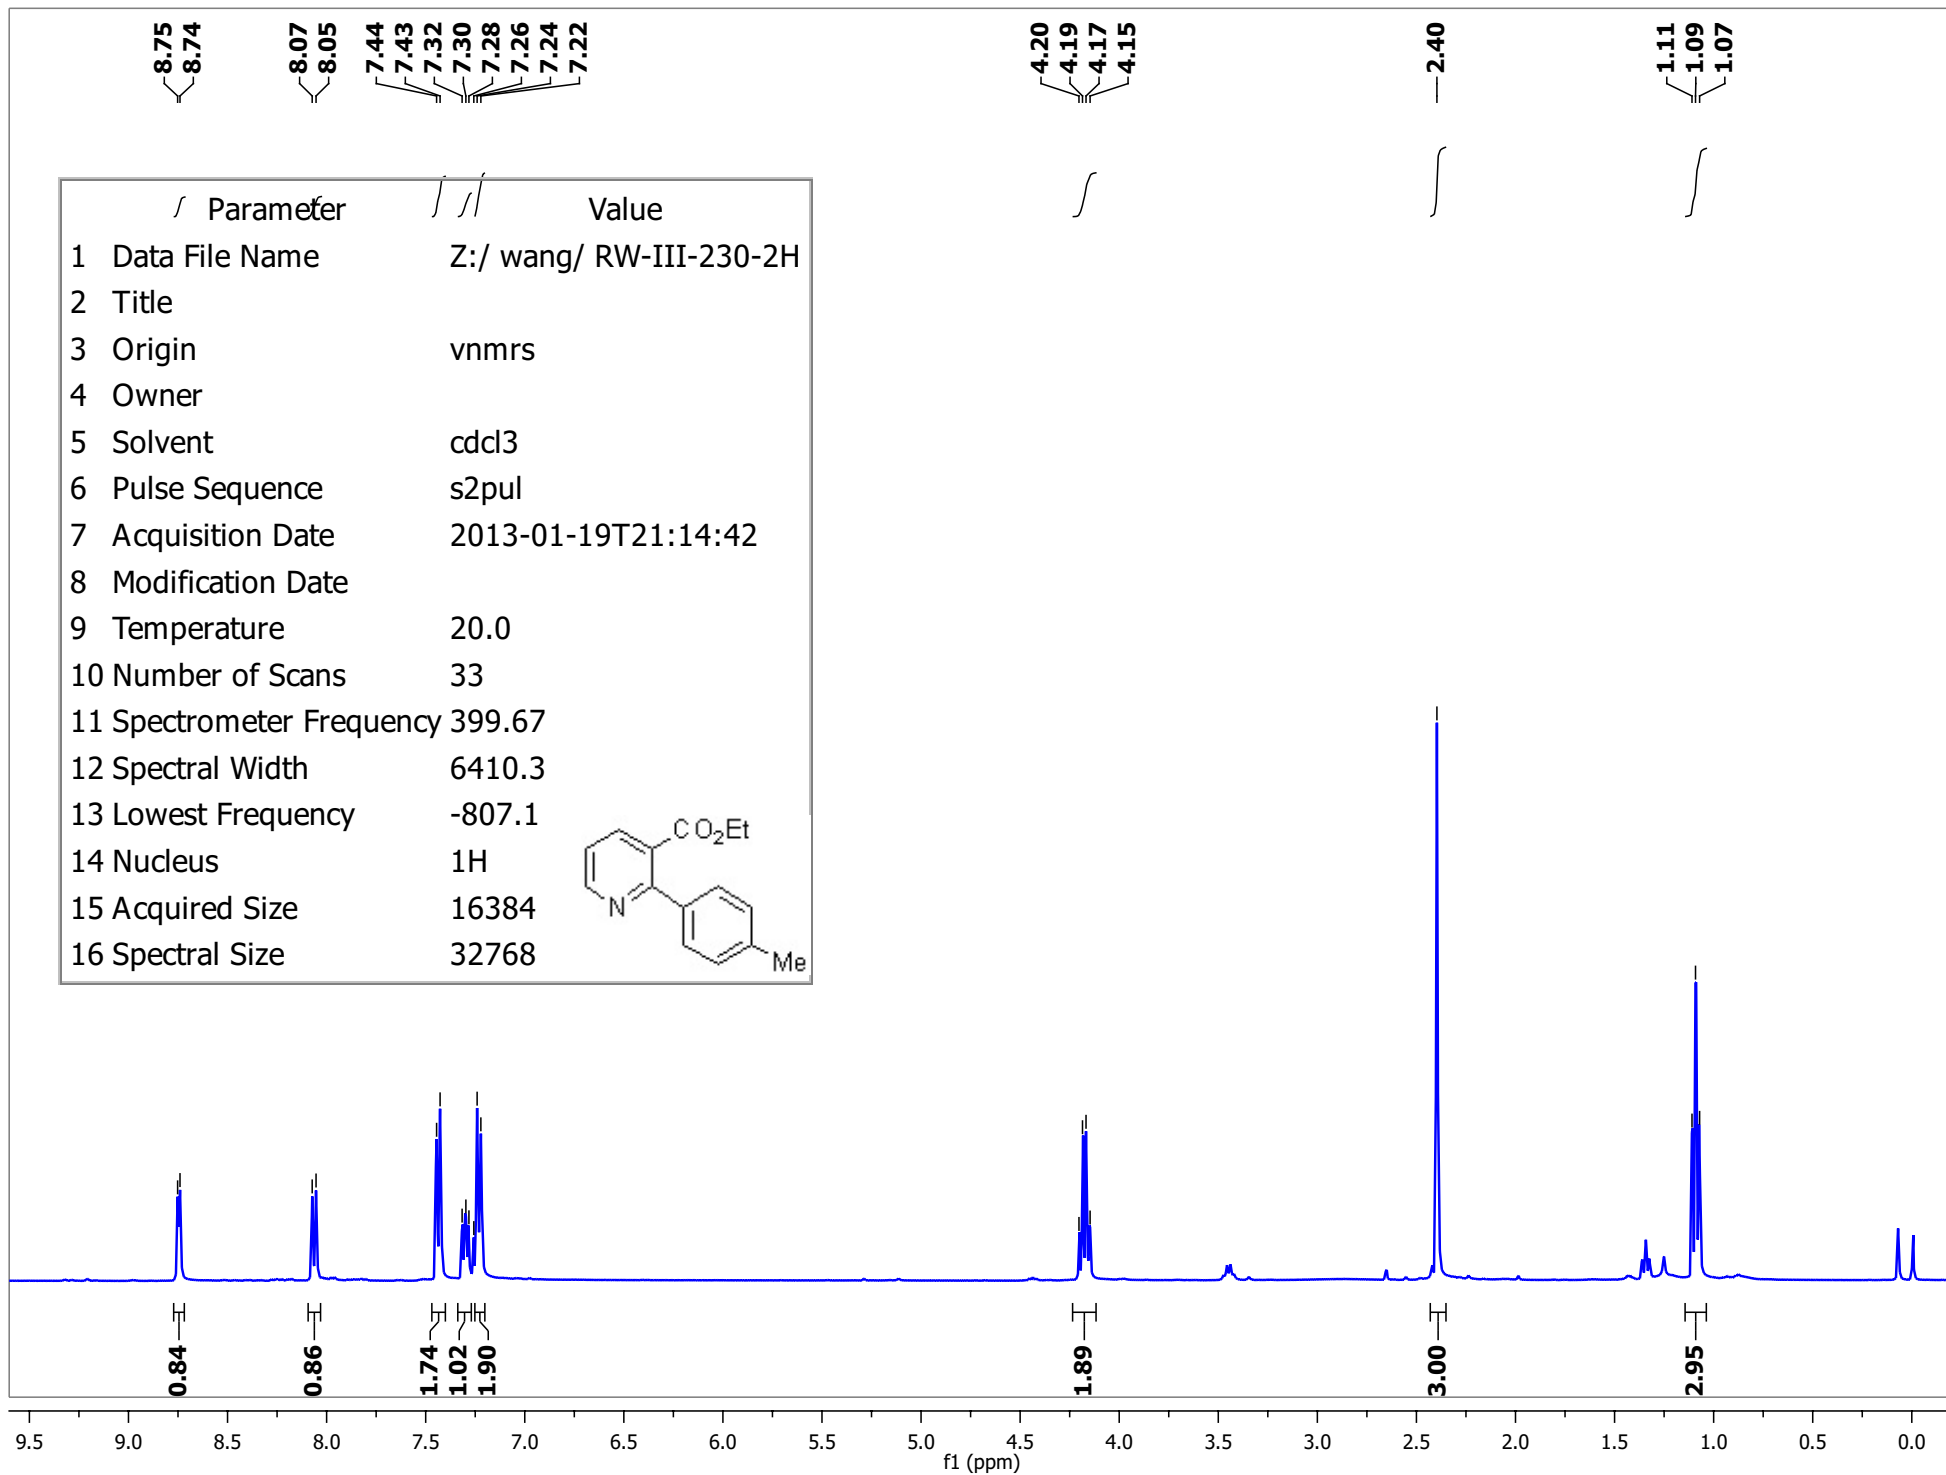

| Parameter                 | Value                   |
|---------------------------|-------------------------|
| 1 Data File Name          | Z:/ wang/ RW-III-230-2H |
| 2 Title                   |                         |
| 3 Origin                  | vnmrs                   |
| 4 Owner                   |                         |
| 5 Solvent                 | cdcl3                   |
| 6 Pulse Sequence          | s2pul                   |
| 7 Acquisition Date        | 2013-01-19T21:14:42     |
| 8 Modification Date       |                         |
| 9 Temperature             | 20.0                    |
| 10 Number of Scans        | 33                      |
| 11 Spectrometer Frequency | 399.67                  |
| 12 Spectral Width         | 6410.3                  |
| 13 Lowest Frequency       | -807.1                  |
| 14 Nucleus                | 1H                      |
| 15 Acquired Size          | 16384                   |
| 16 Spectral Size          | 32768                   |

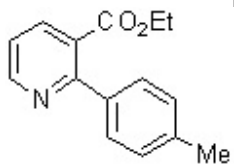

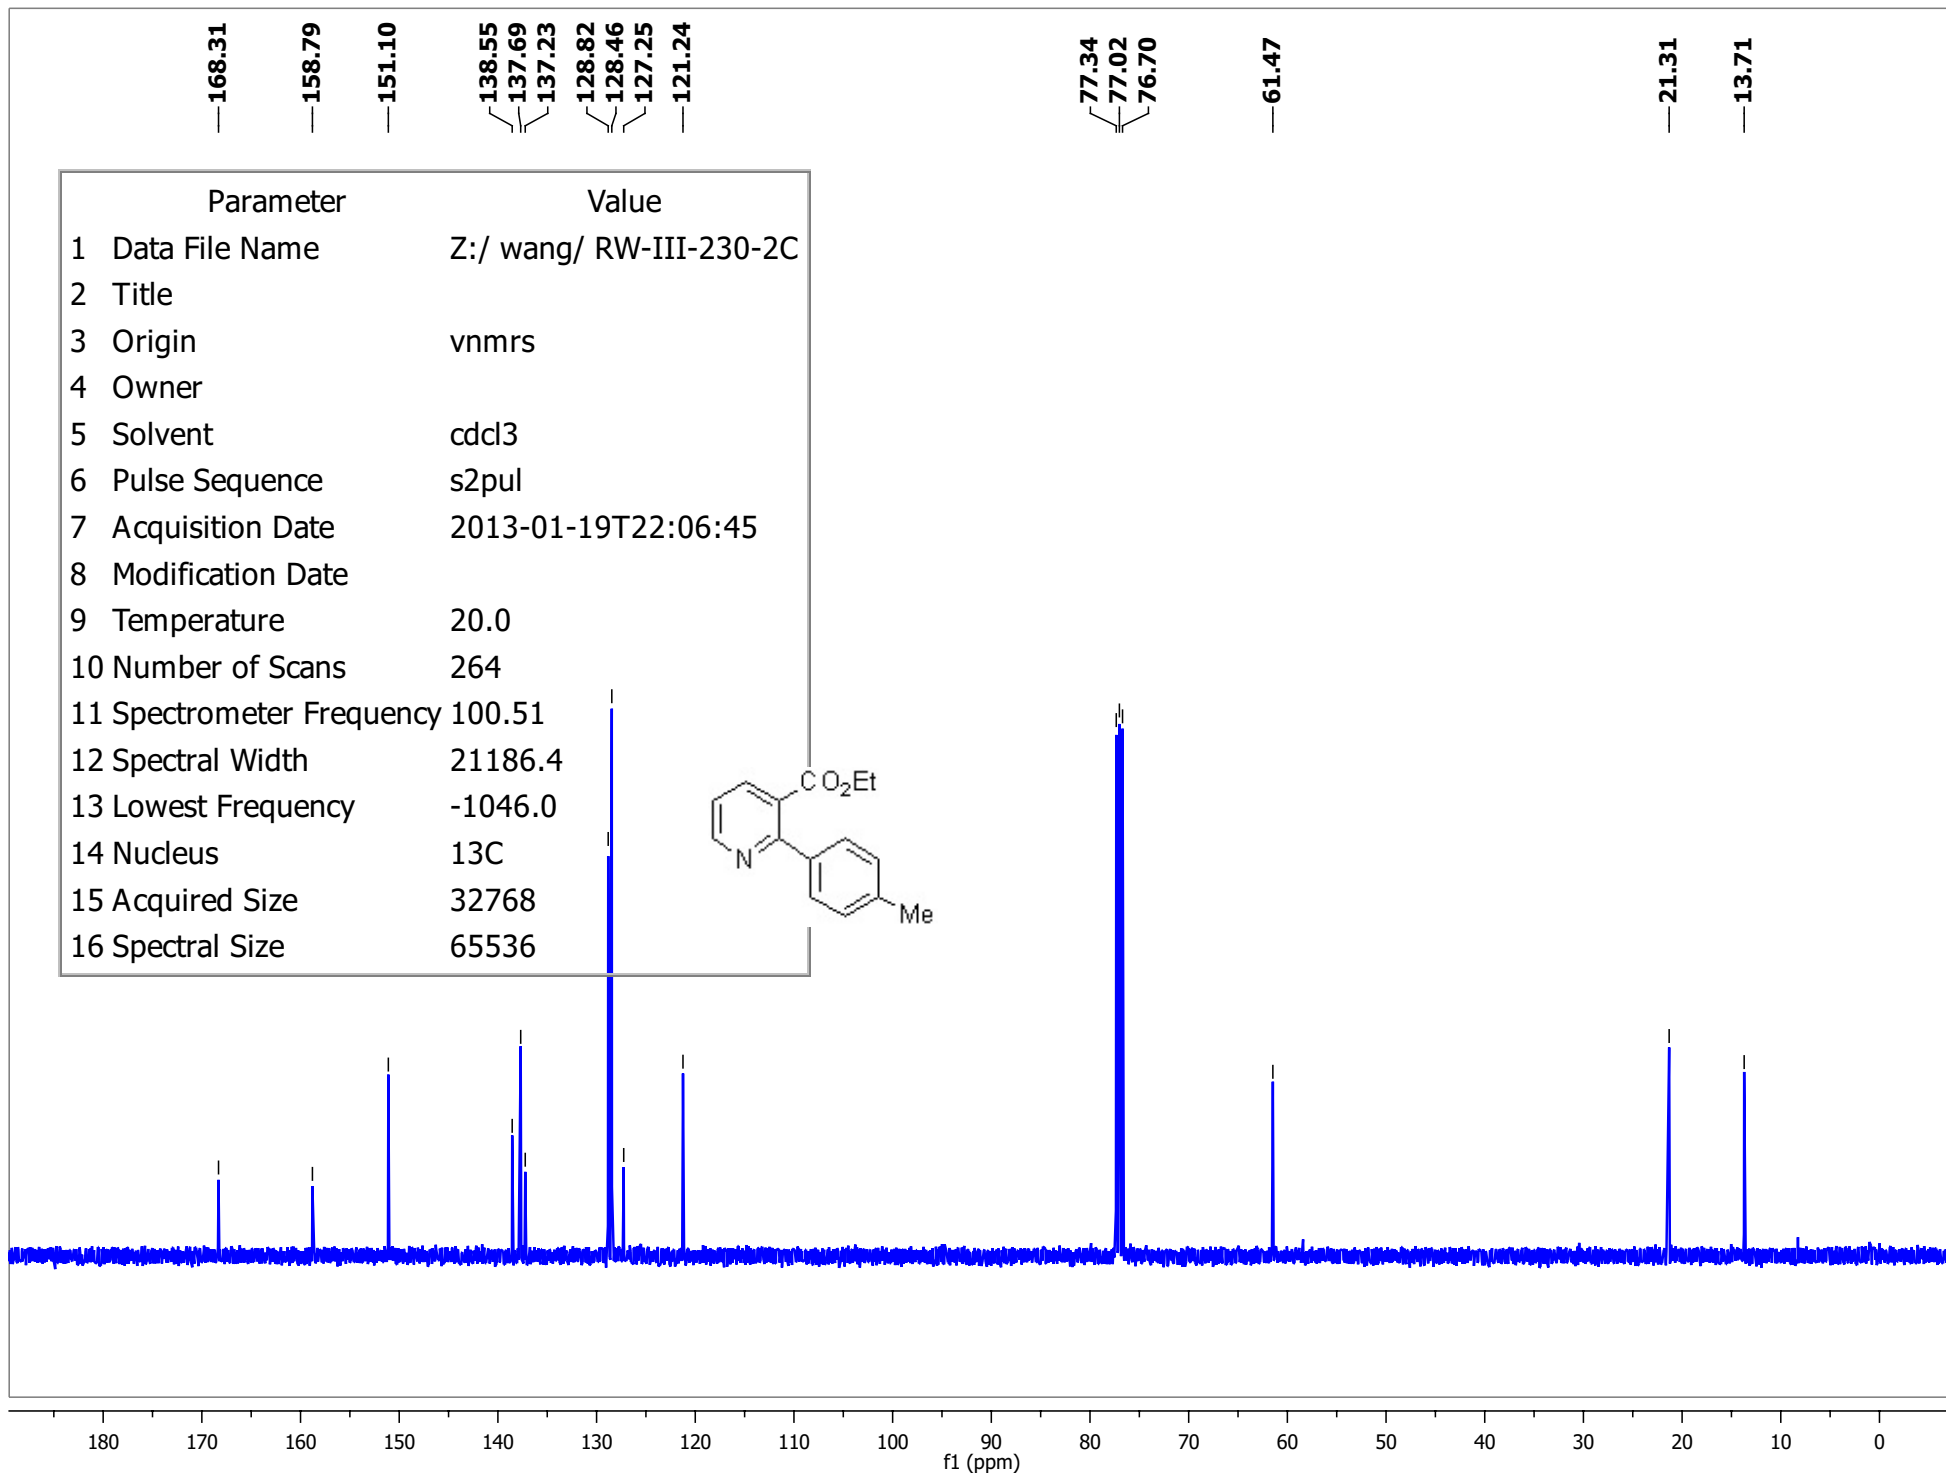

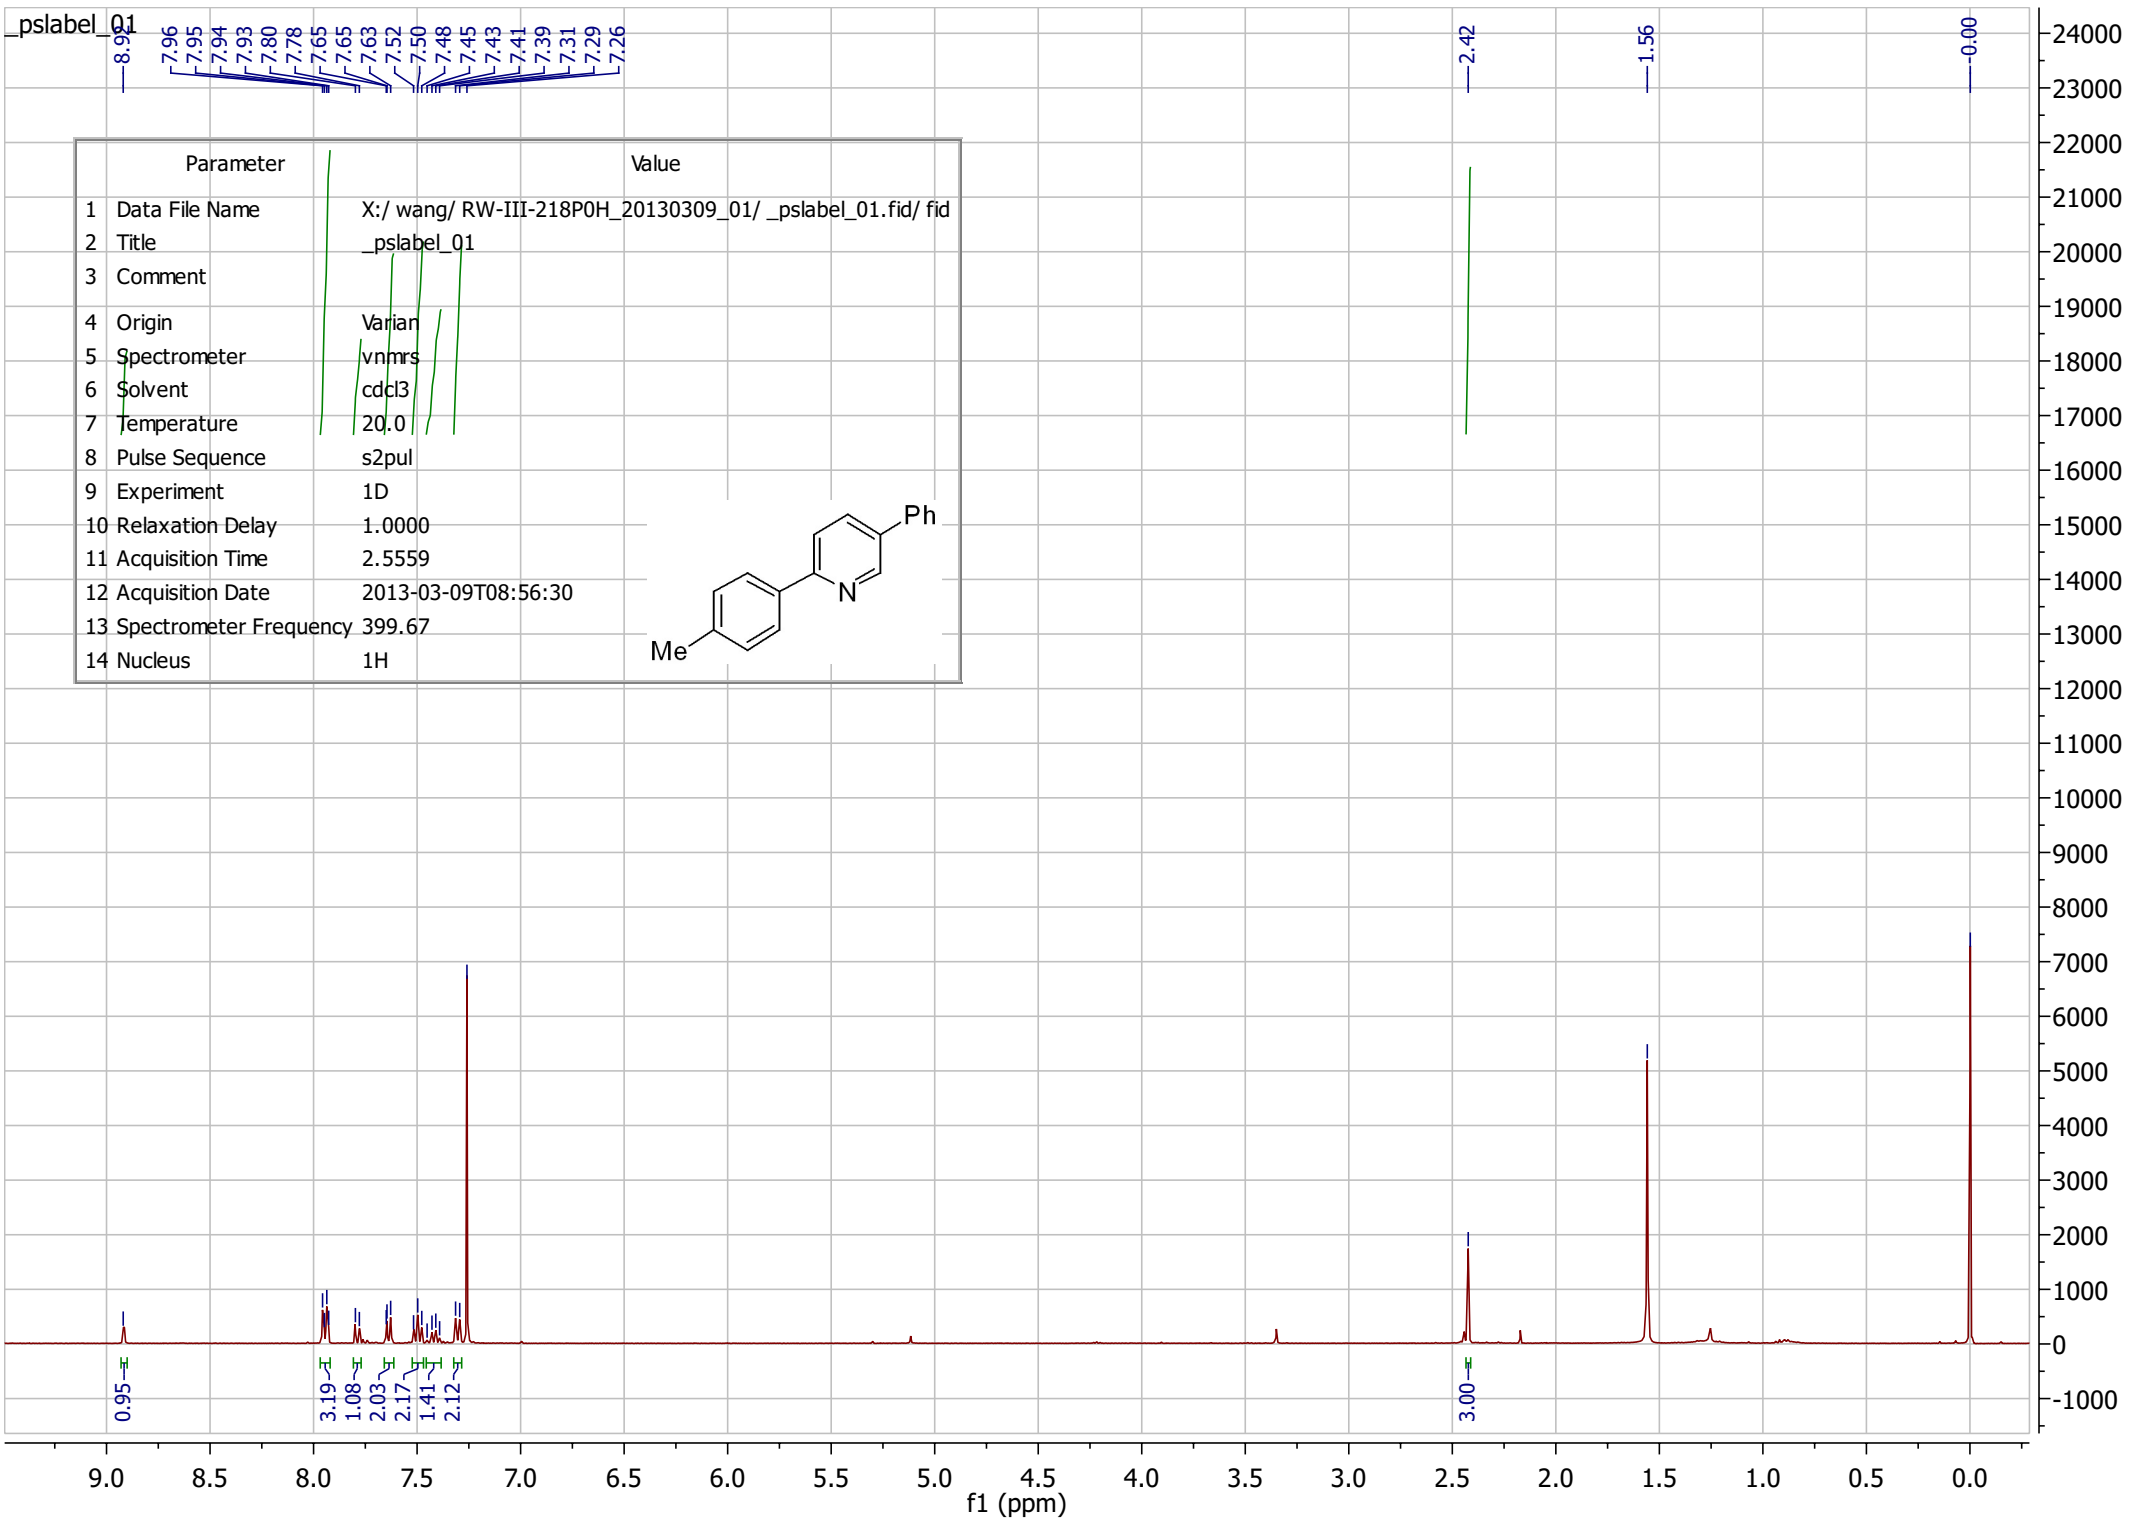

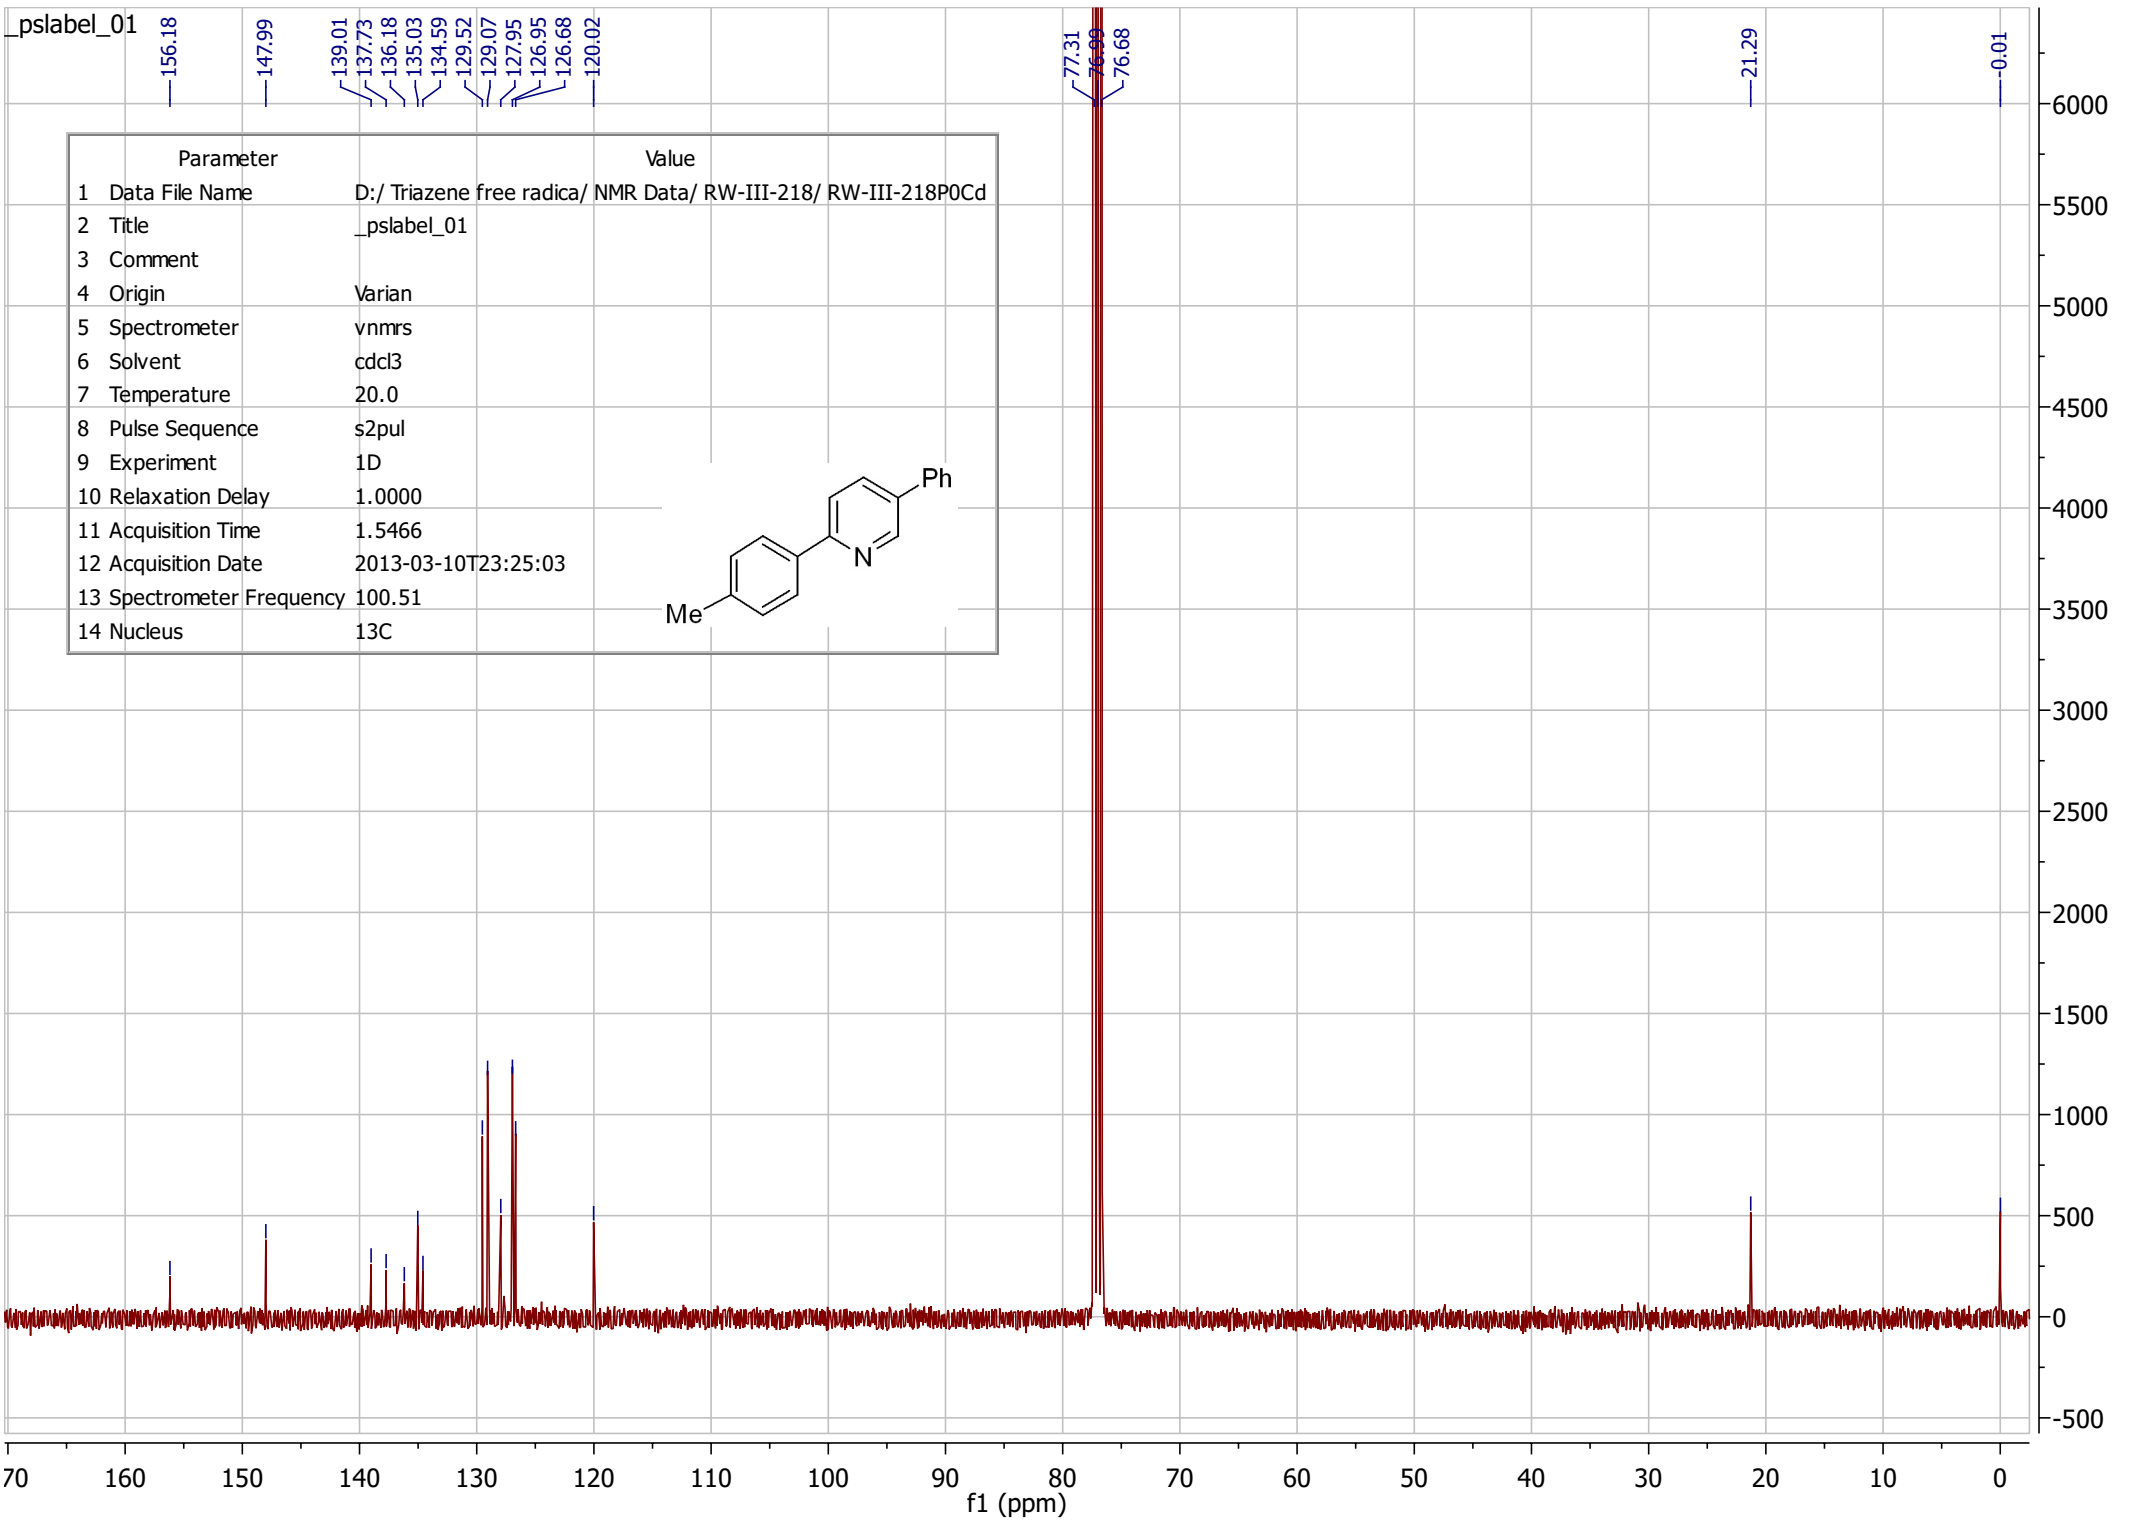

156.18  
147.99

139.01  
137.73  
136.18  
135.03  
134.59  
129.52  
129.07  
127.95  
126.95  
126.68  
120.02

77.31  
76.99  
76.68

21.29

0.01

f1 (ppm)

8.68  
8.67

7.71  
7.69

7.32  
7.30

7.30  
7.29

7.27  
7.26

7.24  
7.20

7.19  
7.18

7.05  
7.03

2.31

0.00

| Parameter                 | Value                   |
|---------------------------|-------------------------|
| 1 Data File Name          | z:/ wang/ RW-III-218P2H |
| 2 Title                   |                         |
| 3 Origin                  | vnmrs                   |
| 4 Owner                   |                         |
| 5 Solvent                 | cdcl3                   |
| 6 Pulse Sequence          | s2pul                   |
| 7 Acquisition Date        | 2013-01-18T14:32:48     |
| 8 Modification Date       |                         |
| 9 Temperature             | 20.0                    |
| 10 Number of Scans        | 33                      |
| 11 Spectrometer Frequency | 399.67                  |
| 12 Spectral Width         | 6410.3                  |
| 13 Lowest Frequency       | -807.1                  |
| 14 Nucleus                | 1H                      |
| 15 Acquired Size          | 16384                   |
| 16 Spectral Size          | 32768                   |

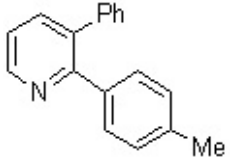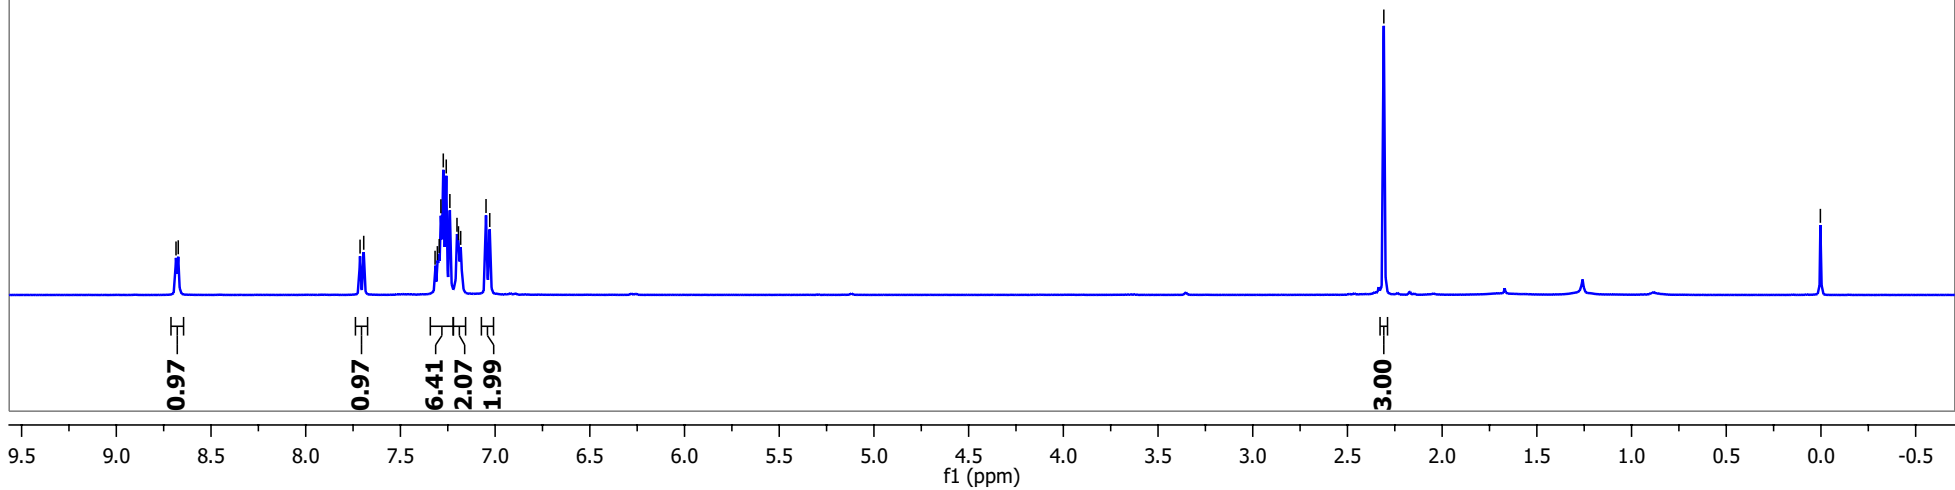

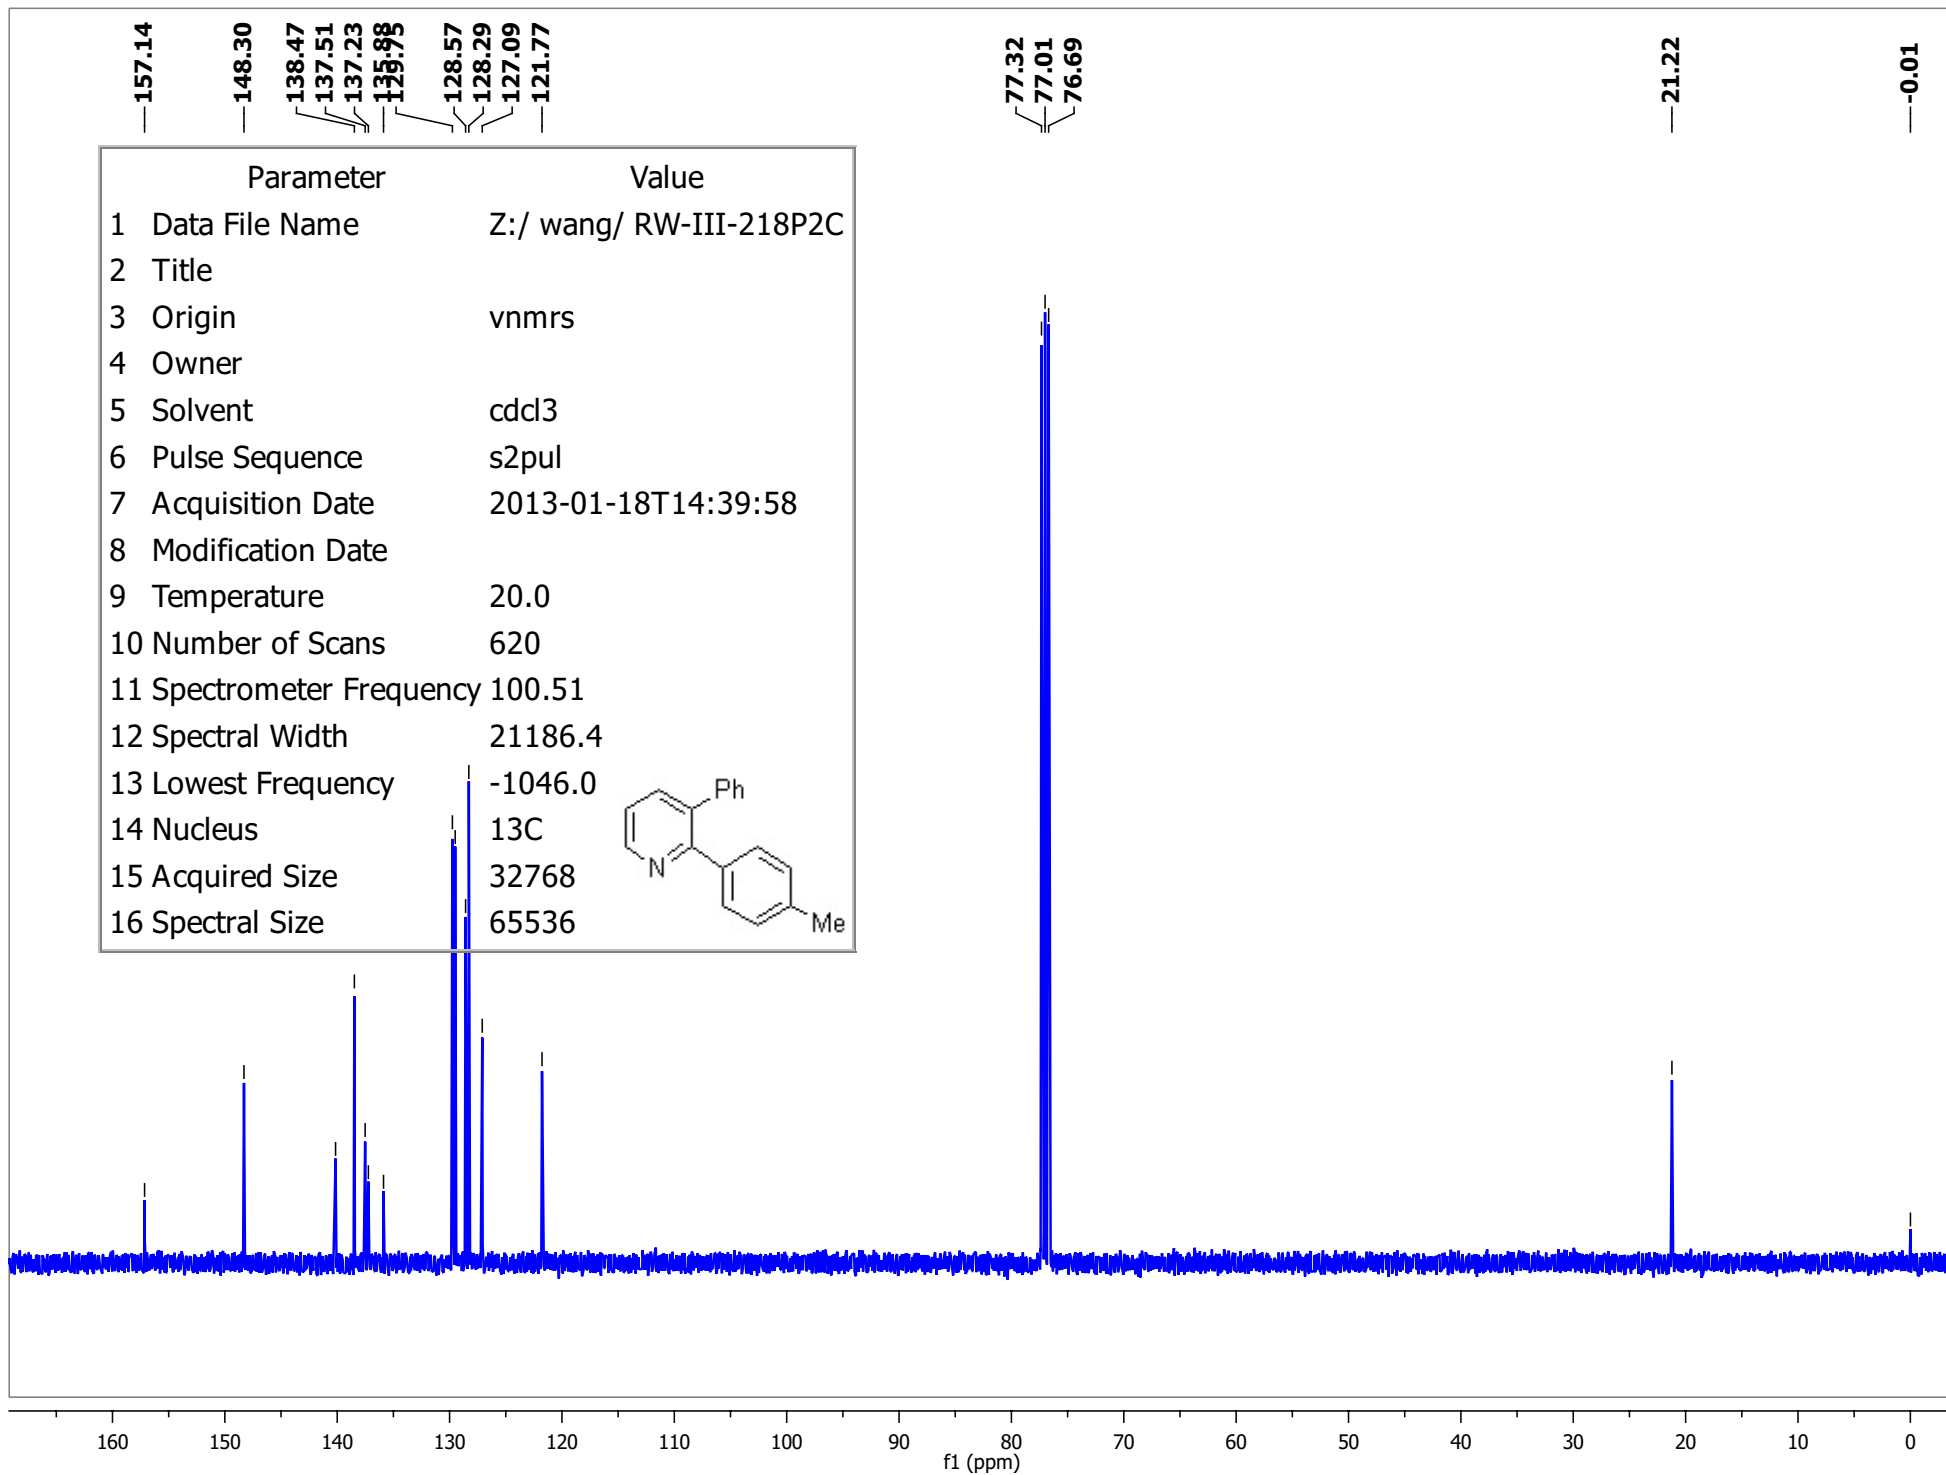

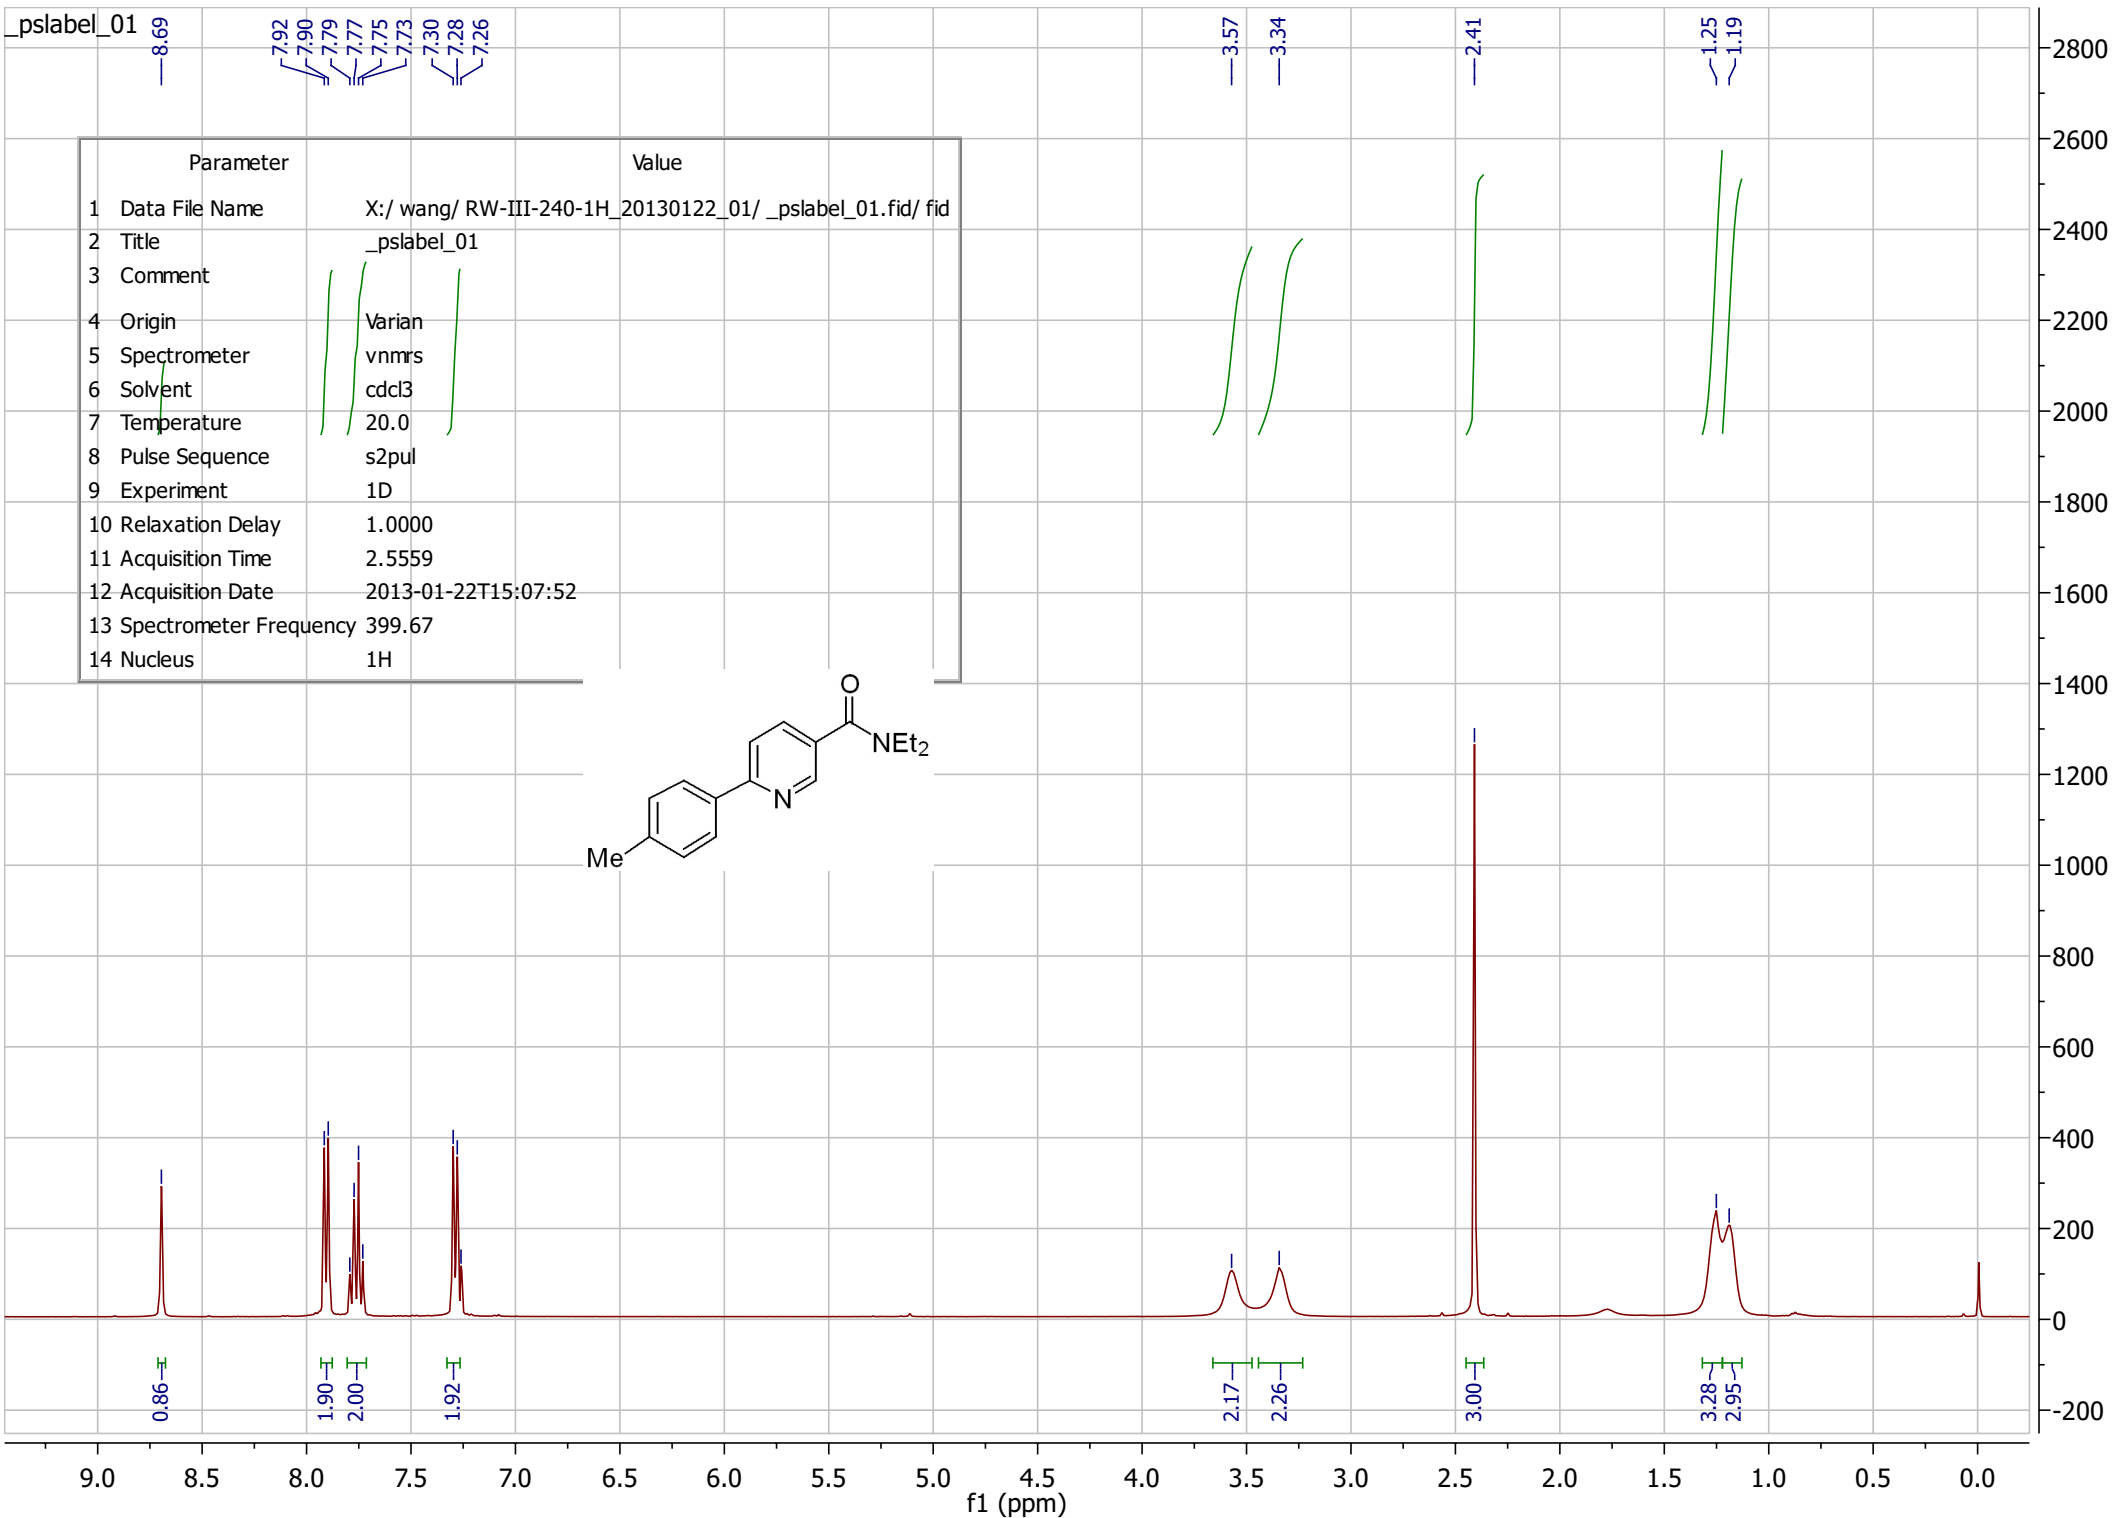

| Parameter                 | Value                                                    |
|---------------------------|----------------------------------------------------------|
| 1 Data File Name          | X:/ wang/ RW-III-240-1H_20130122_01/_pslabel_01.fid/ fid |
| 2 Title                   | _pslabel_01                                              |
| 3 Comment                 |                                                          |
| 4 Origin                  | Varian                                                   |
| 5 Spectrometer            | vnmrs                                                    |
| 6 Solvent                 | cdcl3                                                    |
| 7 Temperature             | 20.0                                                     |
| 8 Pulse Sequence          | s2pul                                                    |
| 9 Experiment              | 1D                                                       |
| 10 Relaxation Delay       | 1.0000                                                   |
| 11 Acquisition Time       | 2.5559                                                   |
| 12 Acquisition Date       | 2013-01-22T15:07:52                                      |
| 13 Spectrometer Frequency | 399.67                                                   |
| 14 Nucleus                | 1H                                                       |



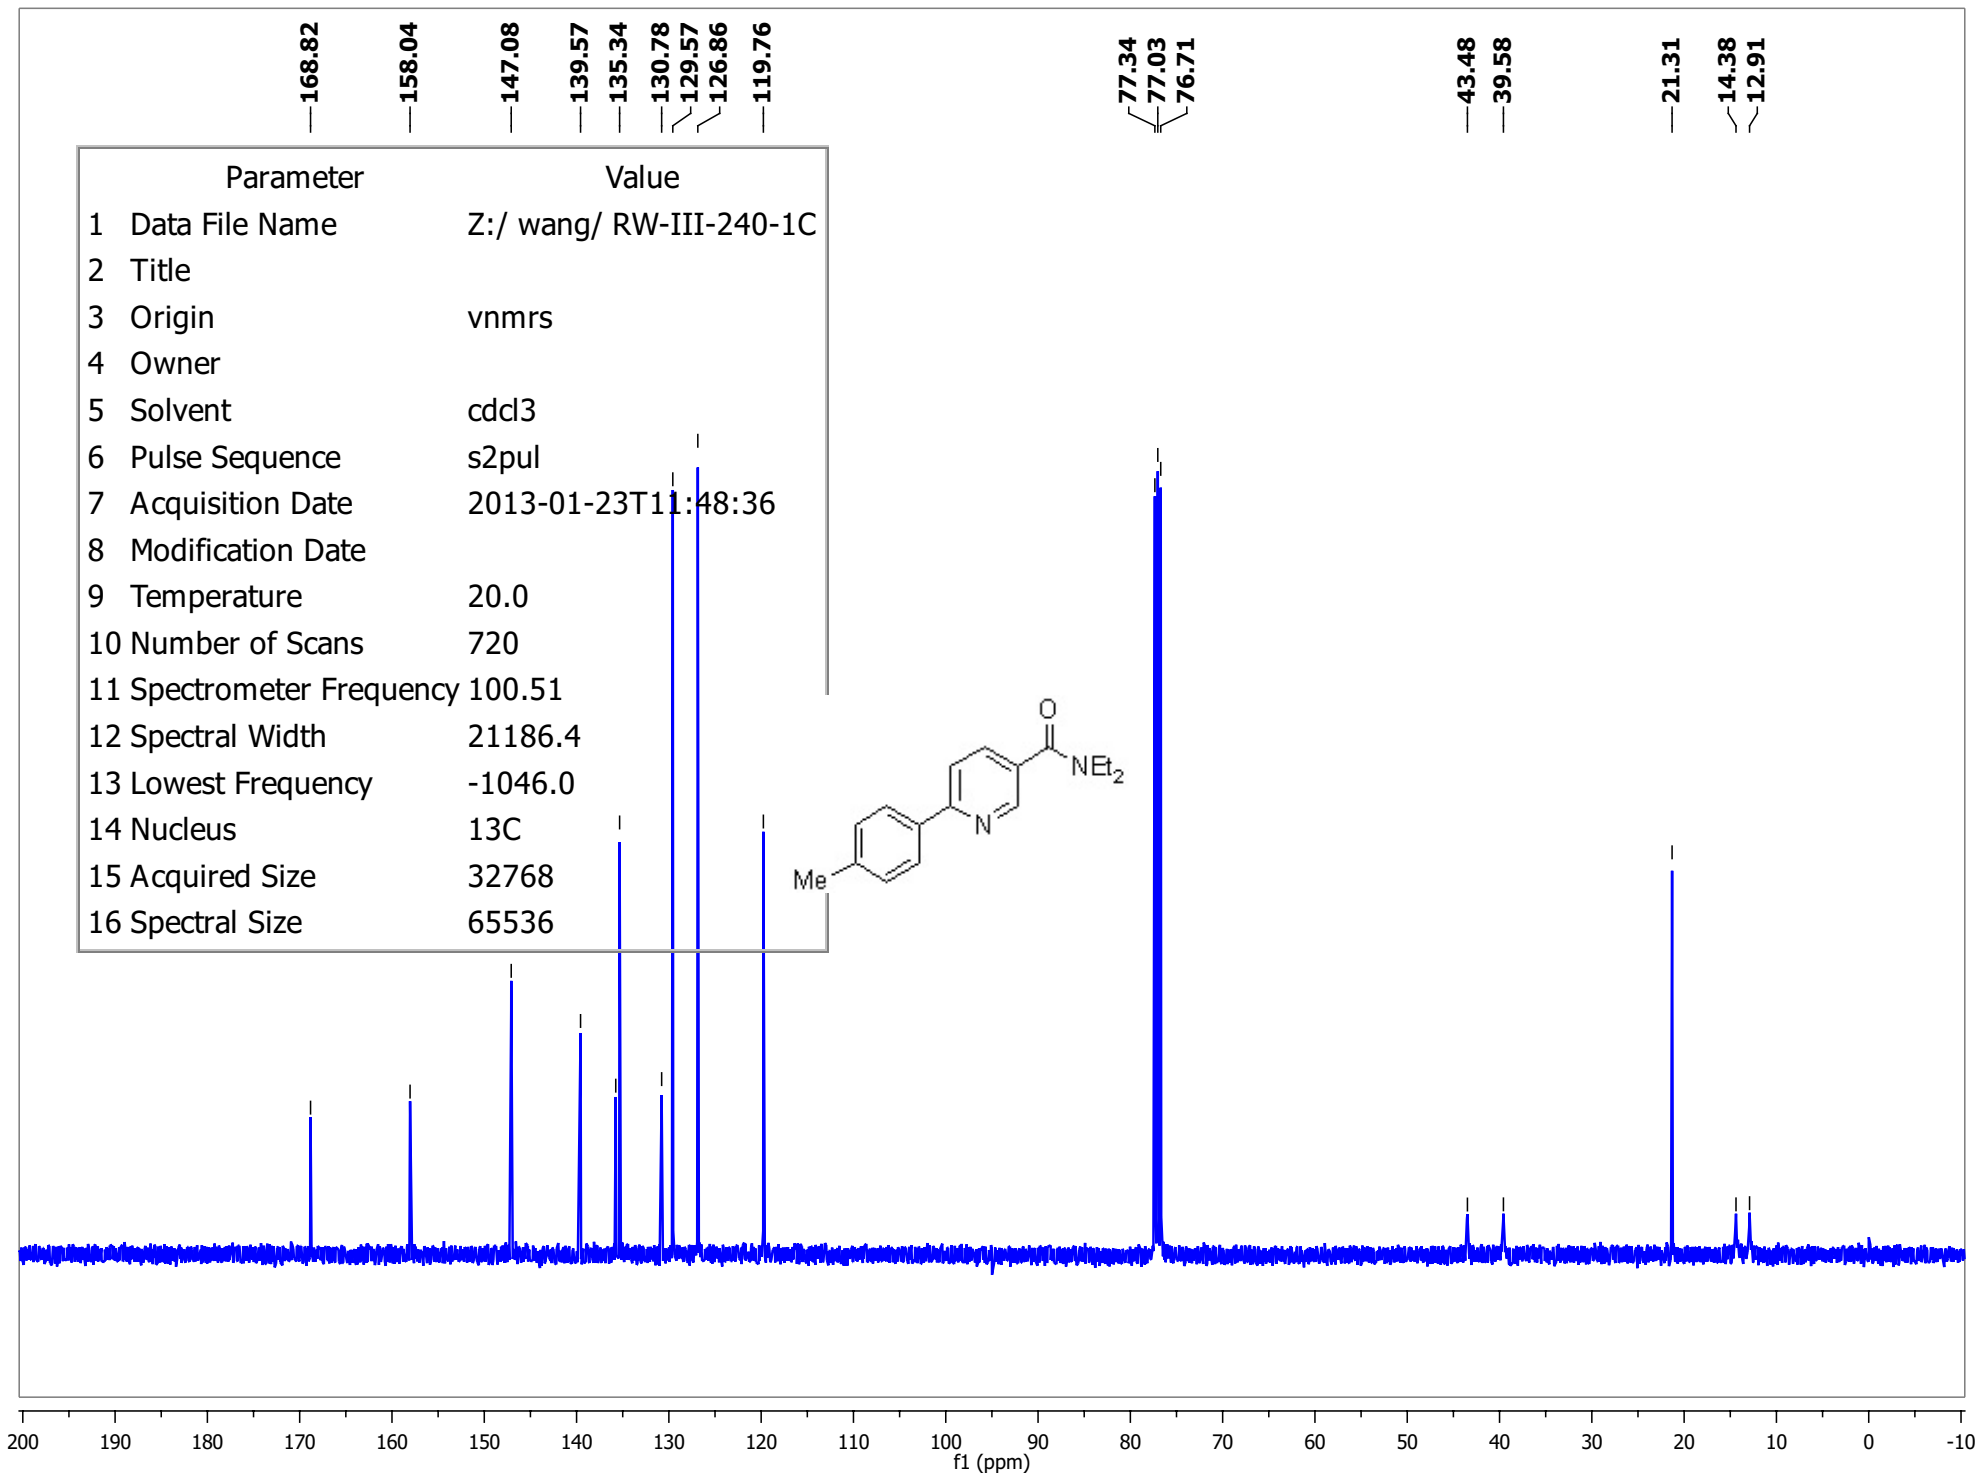

| Parameter                 | Value                   |
|---------------------------|-------------------------|
| 1 Data File Name          | Z:/ wang/ RW-III-240-1C |
| 2 Title                   |                         |
| 3 Origin                  | vnms                    |
| 4 Owner                   |                         |
| 5 Solvent                 | cdd3                    |
| 6 Pulse Sequence          | s2pul                   |
| 7 Acquisition Date        | 2013-01-23T11:48:36     |
| 8 Modification Date       |                         |
| 9 Temperature             | 20.0                    |
| 10 Number of Scans        | 720                     |
| 11 Spectrometer Frequency | 100.51                  |
| 12 Spectral Width         | 21186.4                 |
| 13 Lowest Frequency       | -1046.0                 |
| 14 Nucleus                | 13C                     |
| 15 Acquired Size          | 32768                   |
| 16 Spectral Size          | 65536                   |

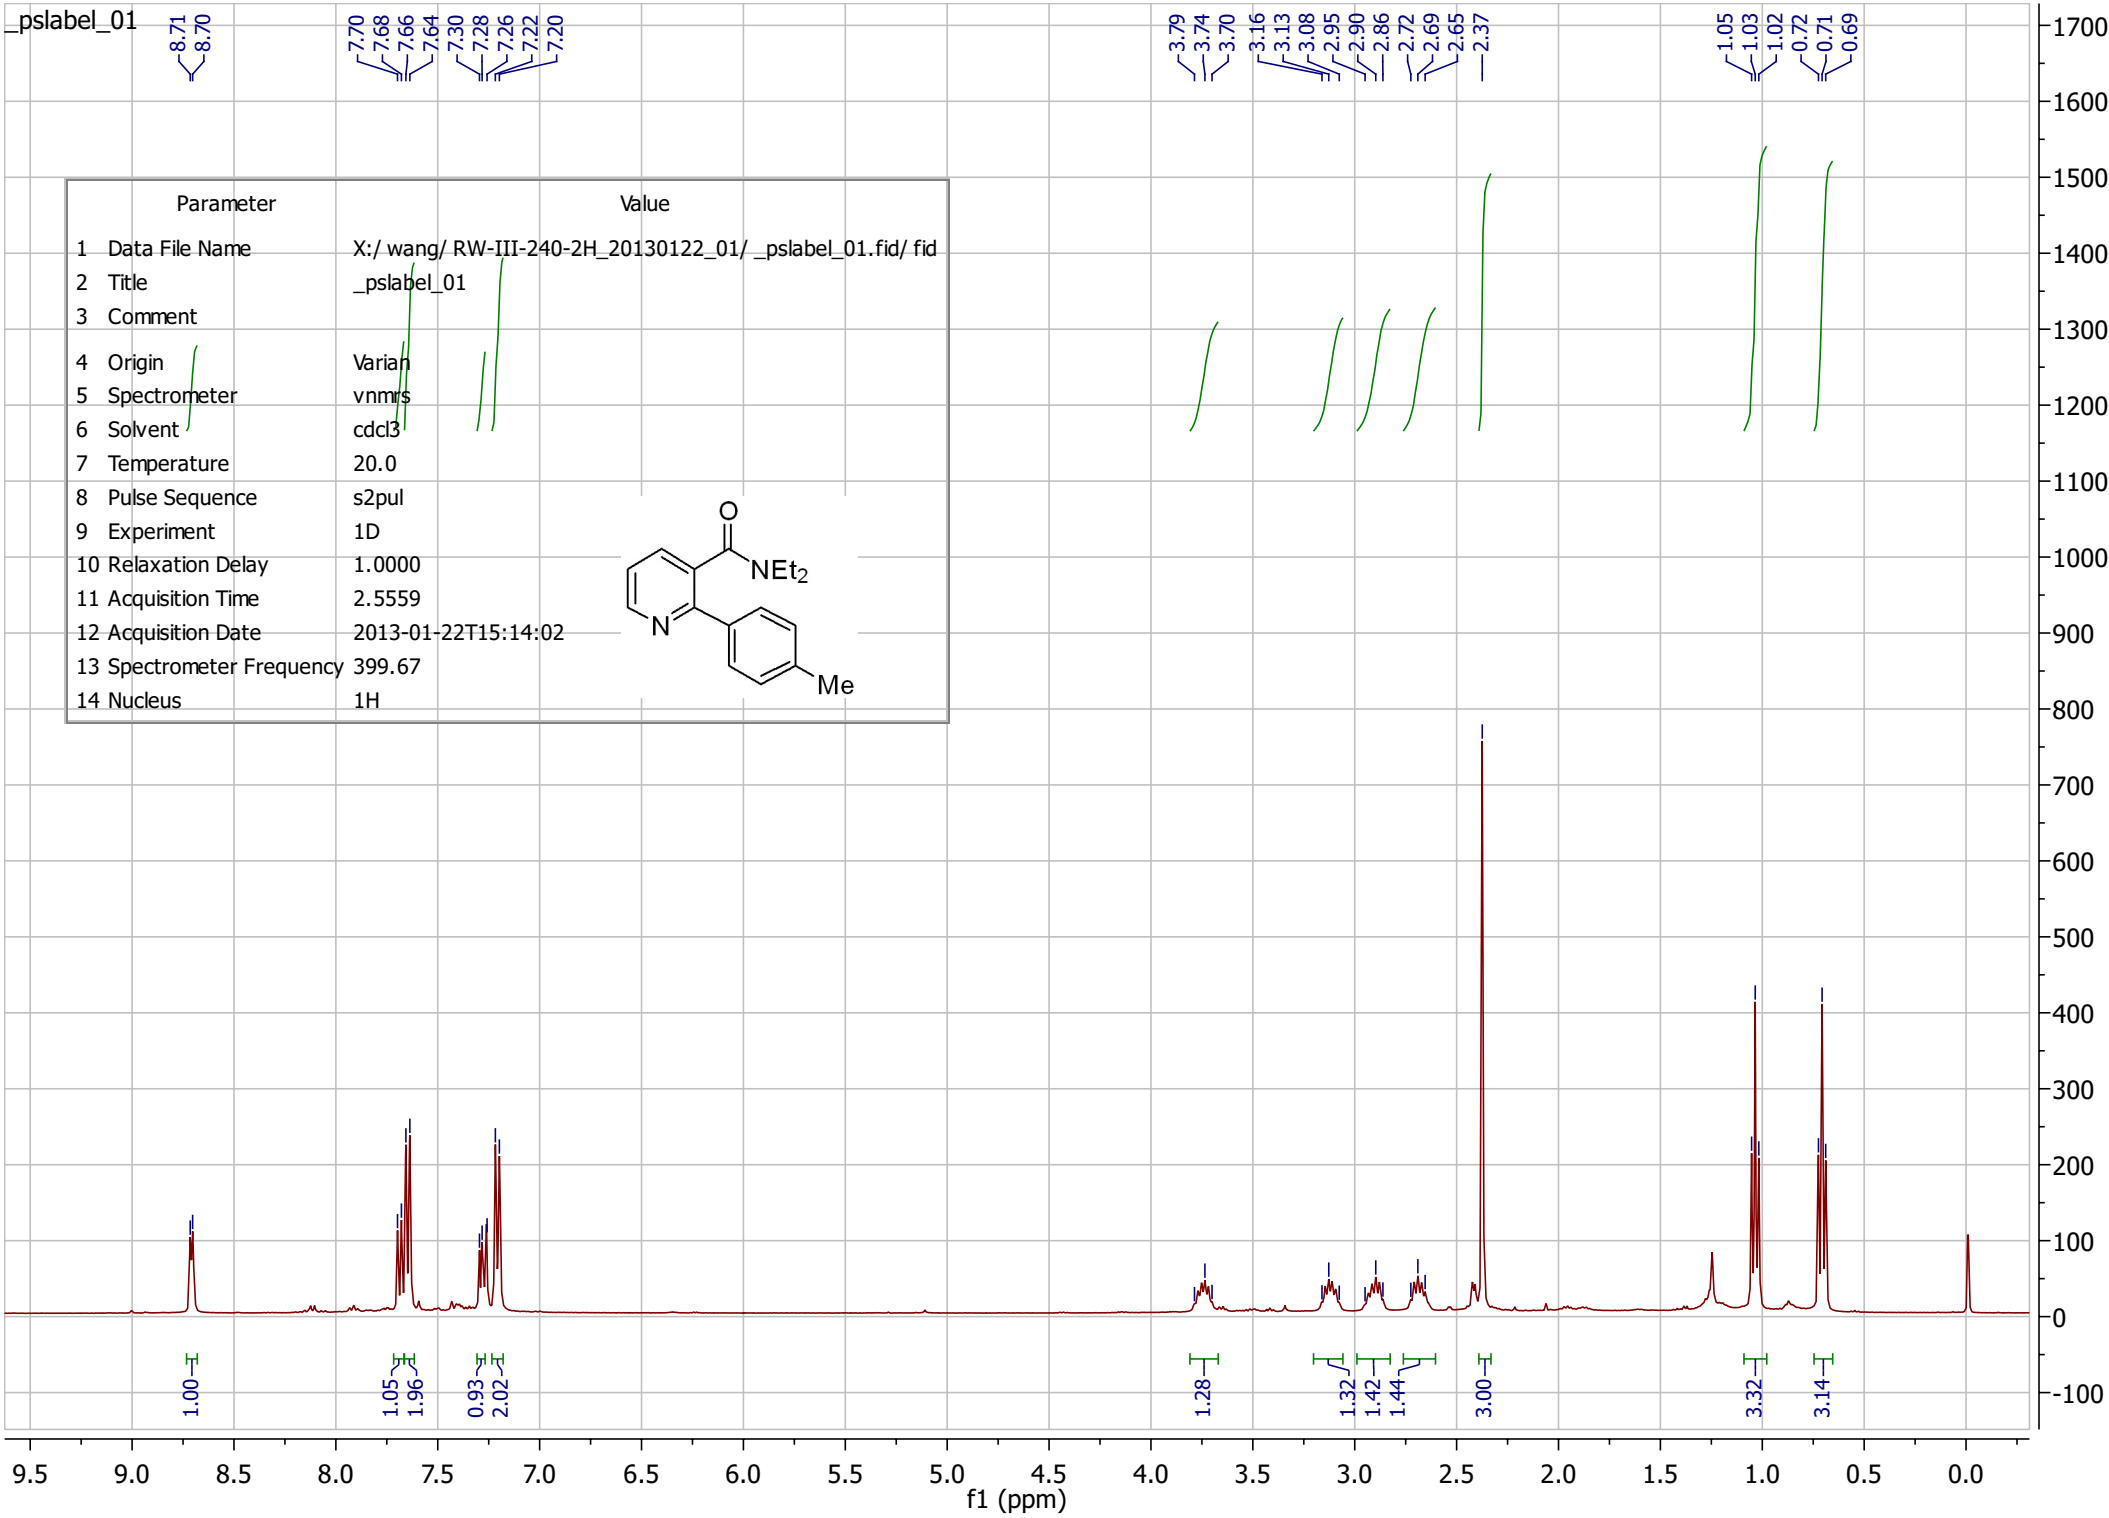

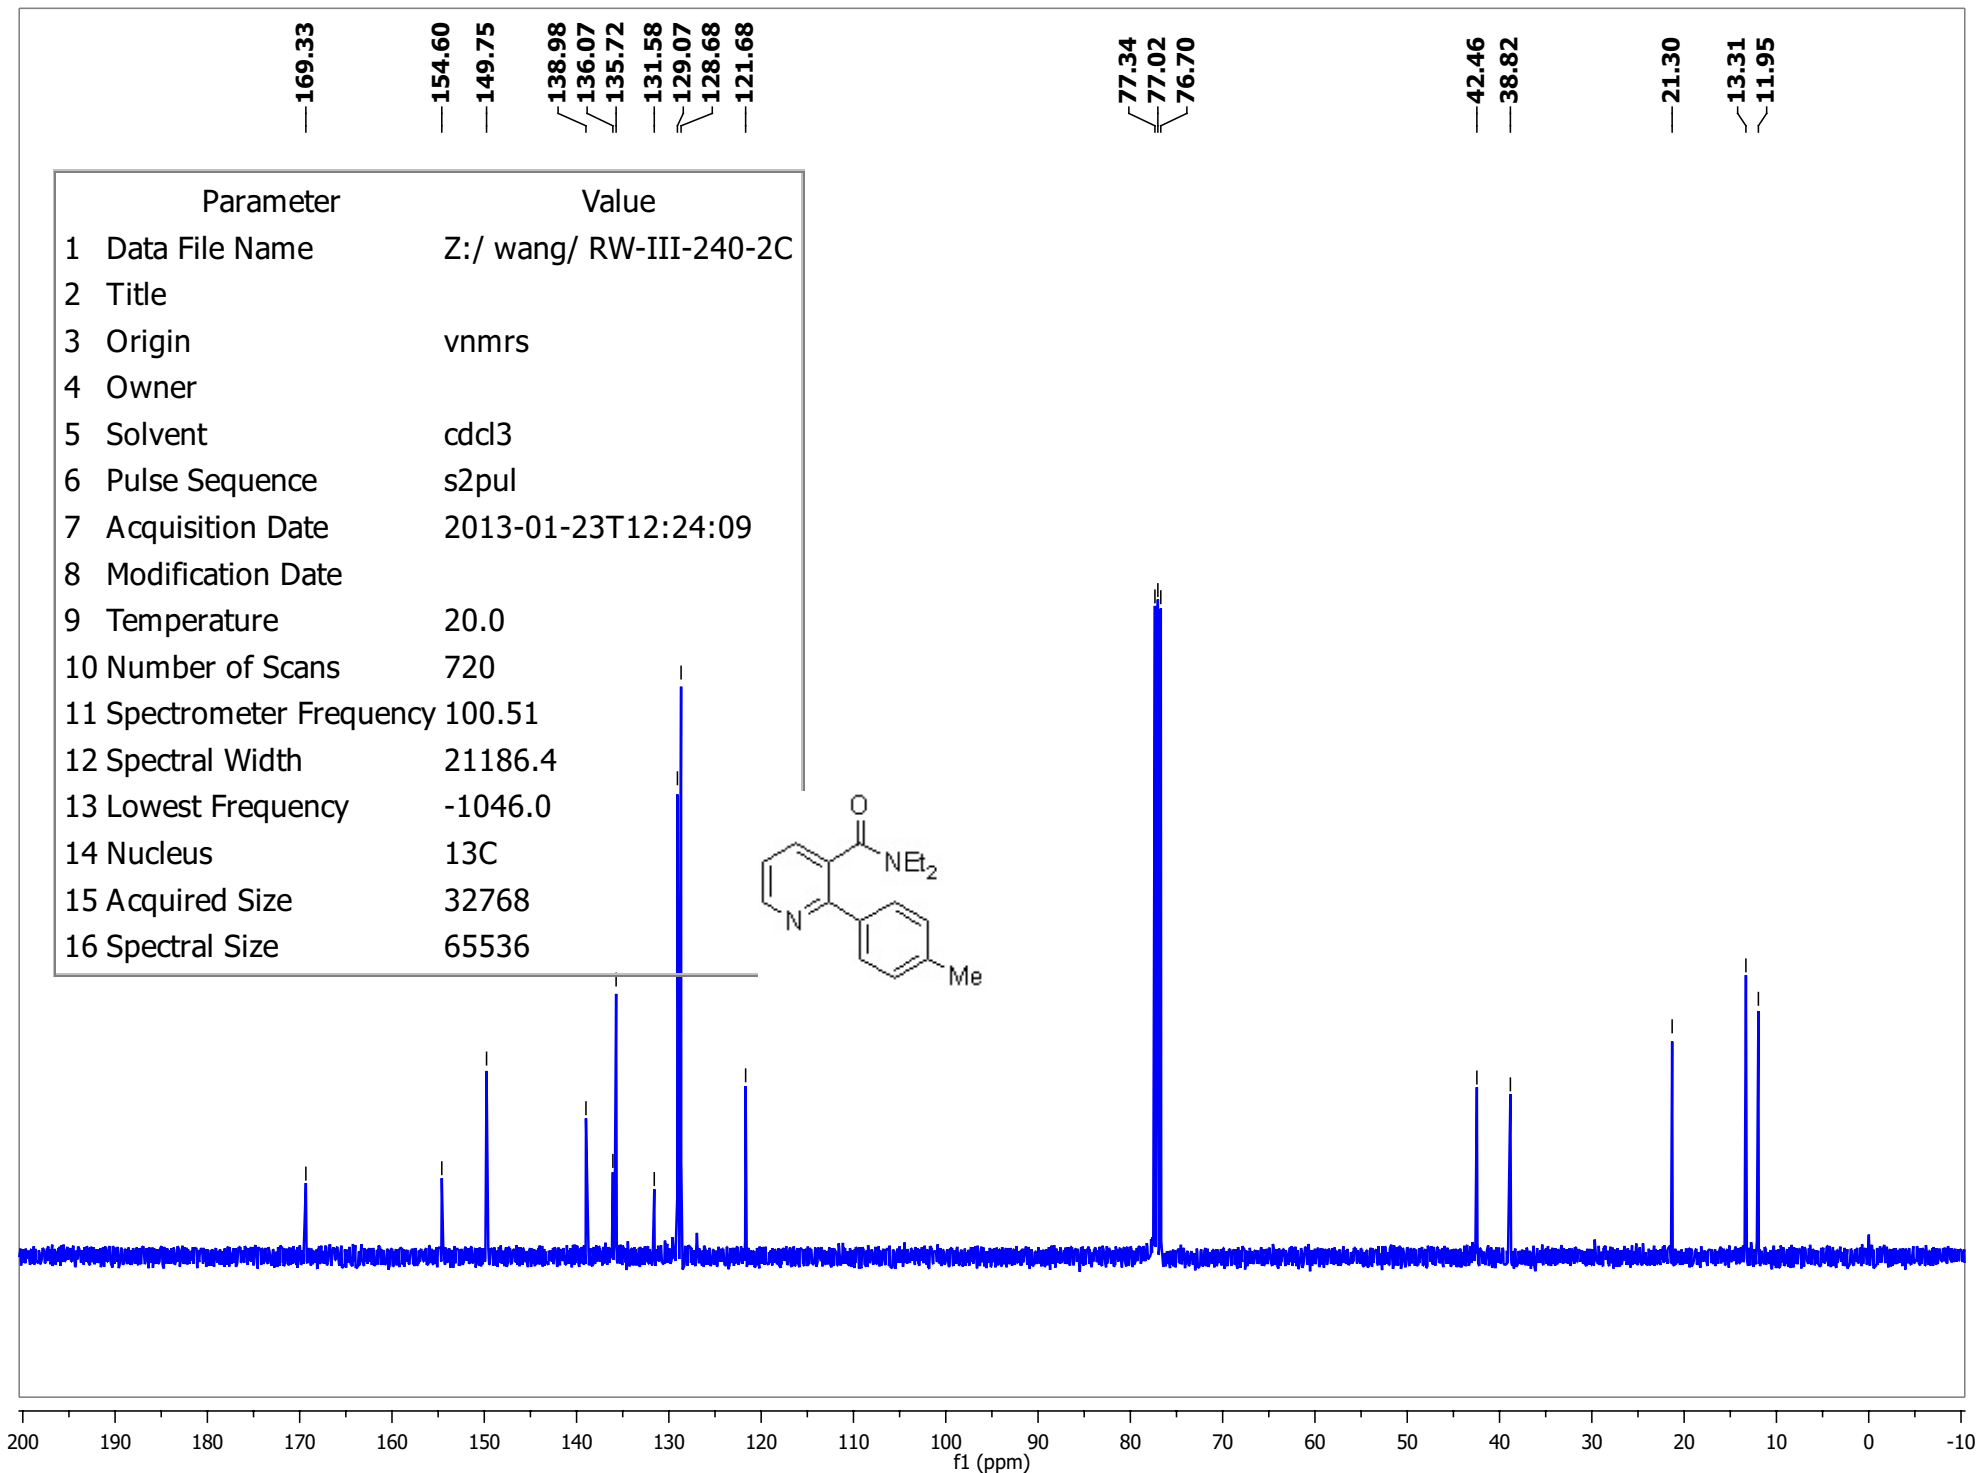

8.68  
8.67  
7.90  
7.73  
7.71  
7.71  
7.69  
7.29  
7.27  
7.26  
7.22  
7.21  
7.20  
7.20  
7.19  
7.19  
7.18

2.46  
2.45  
2.41

| Parameter                 | Value                |
|---------------------------|----------------------|
| 1 Data File Name          | Z:/ wang/ RW-III-219 |
| 2 Title                   |                      |
| 3 Origin                  | vnMrs                |
| 4 Owner                   |                      |
| 5 Solvent                 | cdCl3                |
| 6 Pulse Sequence          | s2pul                |
| 7 Acquisition Date        | 2013-01-19T23:12:07  |
| 8 Modification Date       |                      |
| 9 Temperature             | 20.0                 |
| 10 Number of Scans        | 33                   |
| 11 Spectrometer Frequency | 399.67               |
| 12 Spectral Width         | 6410.3               |
| 13 Lowest Frequency       | -807.1               |
| 14 Nucleus                | 1H                   |
| 15 Acquired Size          | 16384                |
| 16 Spectral Size          | 32768                |

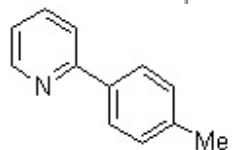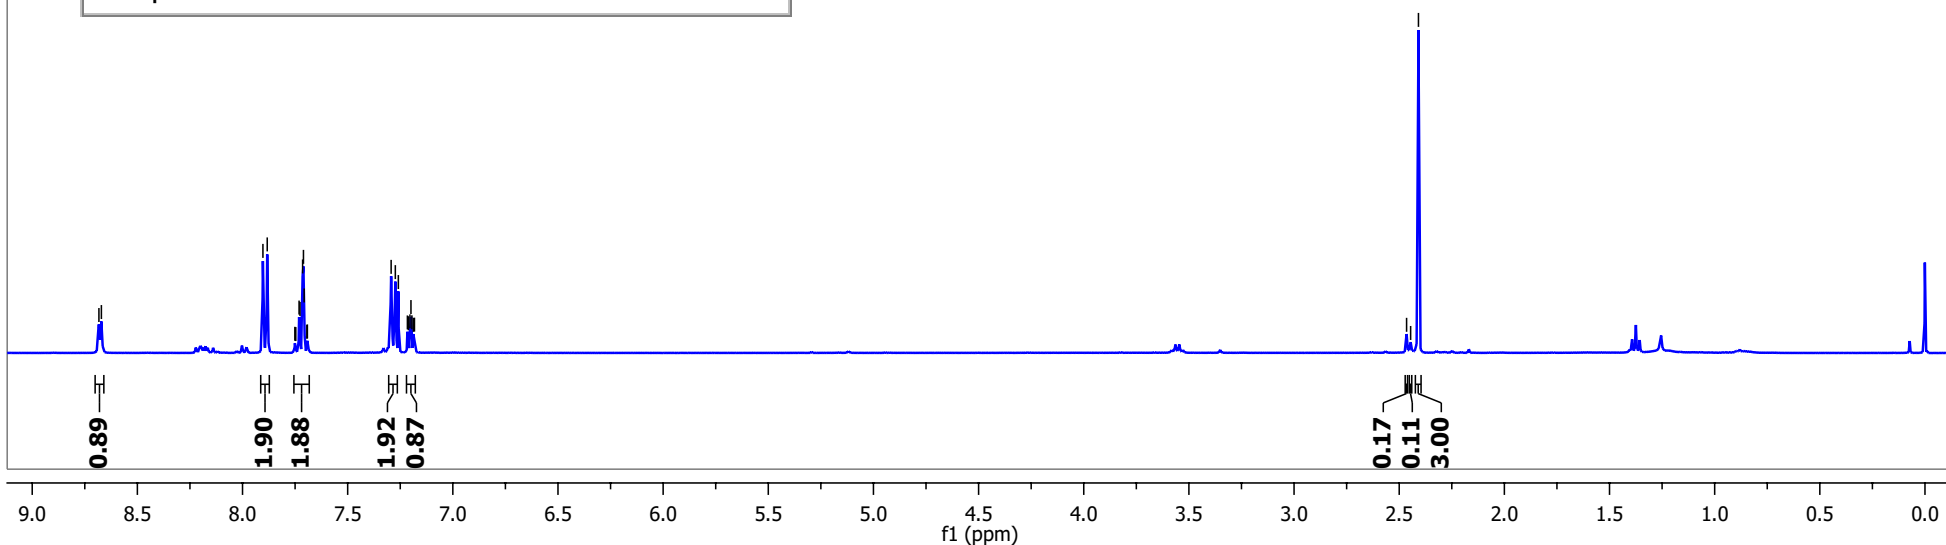

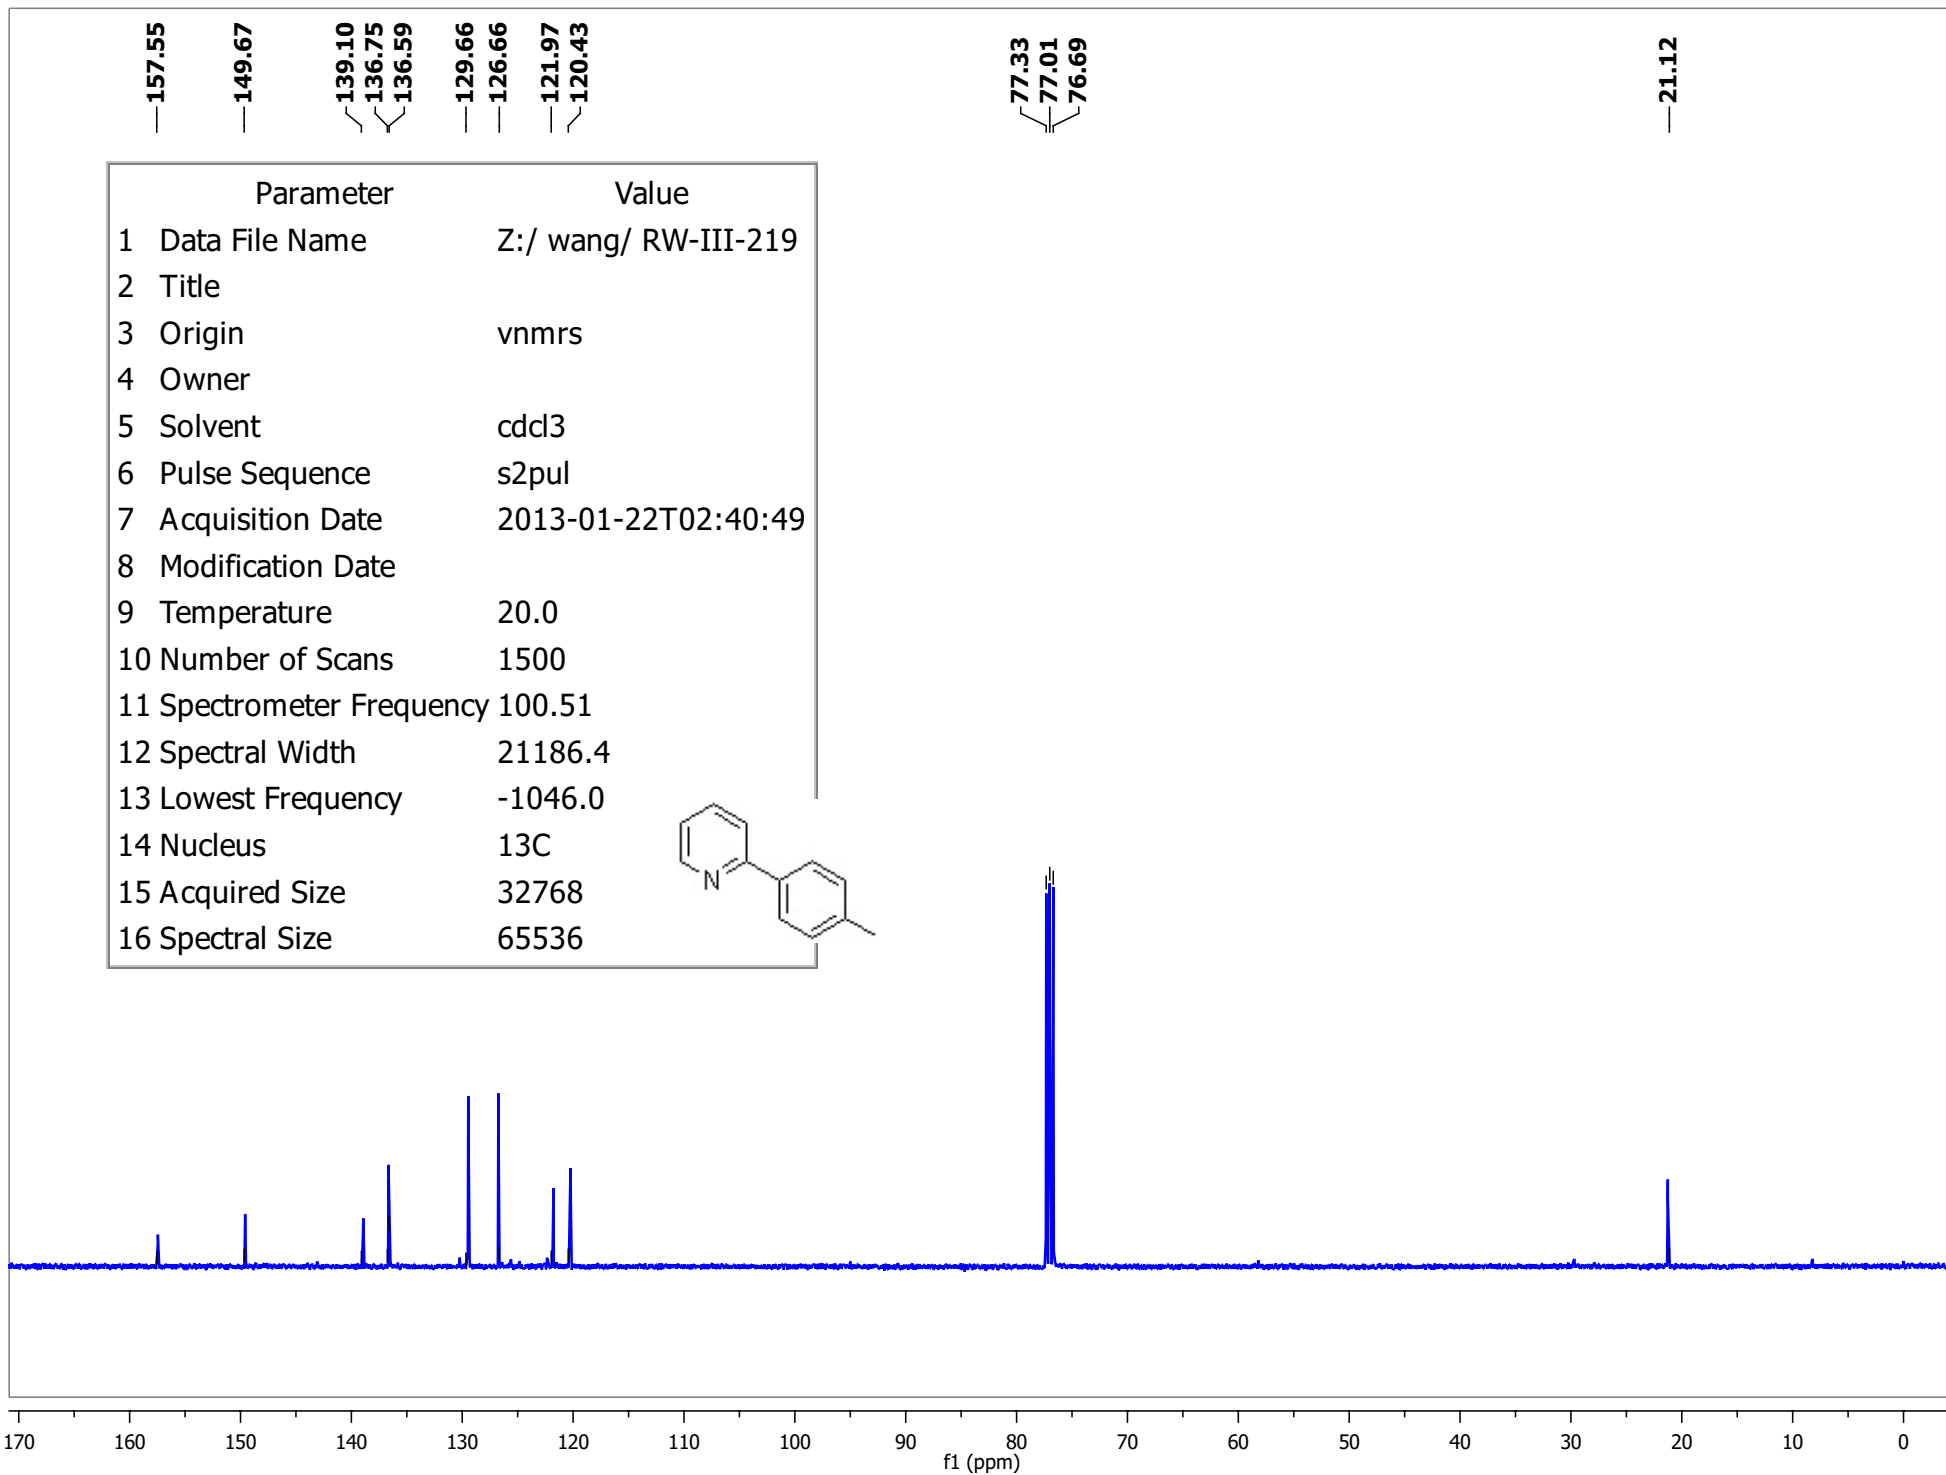

8.64  
8.63

7.54  
7.50  
7.50  
7.49  
7.48  
7.31  
7.29  
7.26

2.42

0.00

| Parameter                 | Value                   |
|---------------------------|-------------------------|
| 1 Data File Name          | Z:/ wang/ RW-III-219P2H |
| 2 Title                   |                         |
| 3 Origin                  | vnmrs                   |
| 4 Owner                   |                         |
| 5 Solvent                 | cdcl3                   |
| 6 Pulse Sequence          | s2pul                   |
| 7 Acquisition Date        | 2013-03-08T14:53:30     |
| 8 Modification Date       |                         |
| 9 Temperature             | 20.0                    |
| 10 Number of Scans        | 34                      |
| 11 Spectrometer Frequency | 399.67                  |
| 12 Spectral Width         | 6410.3                  |
| 13 Lowest Frequency       | -807.1                  |
| 14 Nucleus                | 1H                      |
| 15 Acquired Size          | 16384                   |
| 16 Spectral Size          | 32768                   |

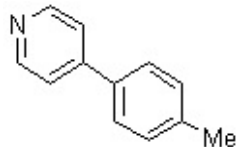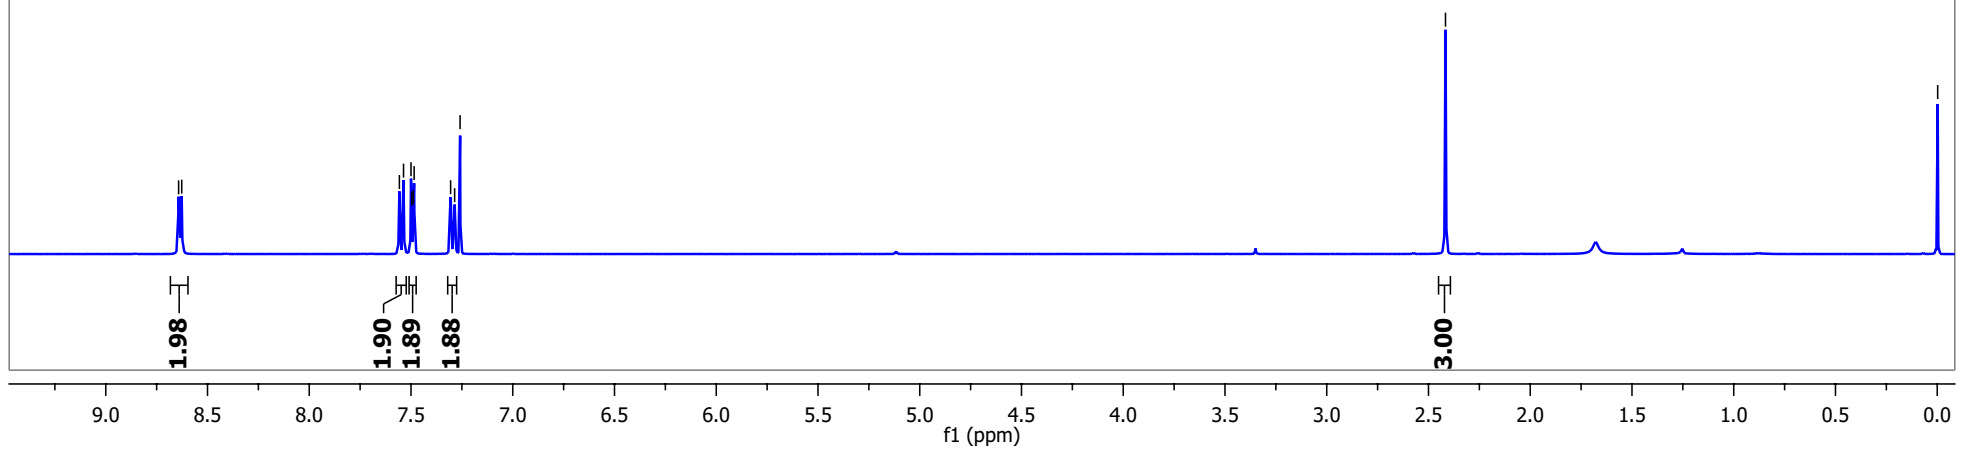

150.19  
148.20

139.20  
135.18

129.82  
126.80

121.38

77.32  
77.00  
76.68

21.16

| Parameter                 | Value                   |
|---------------------------|-------------------------|
| 1 Data File Name          | Z:/ wang/ RW-III-219P2C |
| 2 Title                   |                         |
| 3 Origin                  | vnms                    |
| 4 Owner                   |                         |
| 5 Solvent                 | cdd3                    |
| 6 Pulse Sequence          | s2pul                   |
| 7 Acquisition Date        | 2013-03-08T15:04:05     |
| 8 Modification Date       |                         |
| 9 Temperature             | 20.0                    |
| 10 Number of Scans        | 650                     |
| 11 Spectrometer Frequency | 100.51                  |
| 12 Spectral Width         | 21186.4                 |
| 13 Lowest Frequency       | -1046.0                 |
| 14 Nucleus                | 13C                     |
| 15 Acquired Size          | 32768                   |
| 16 Spectral Size          | 65536                   |

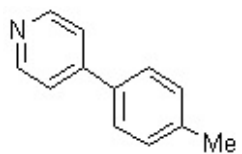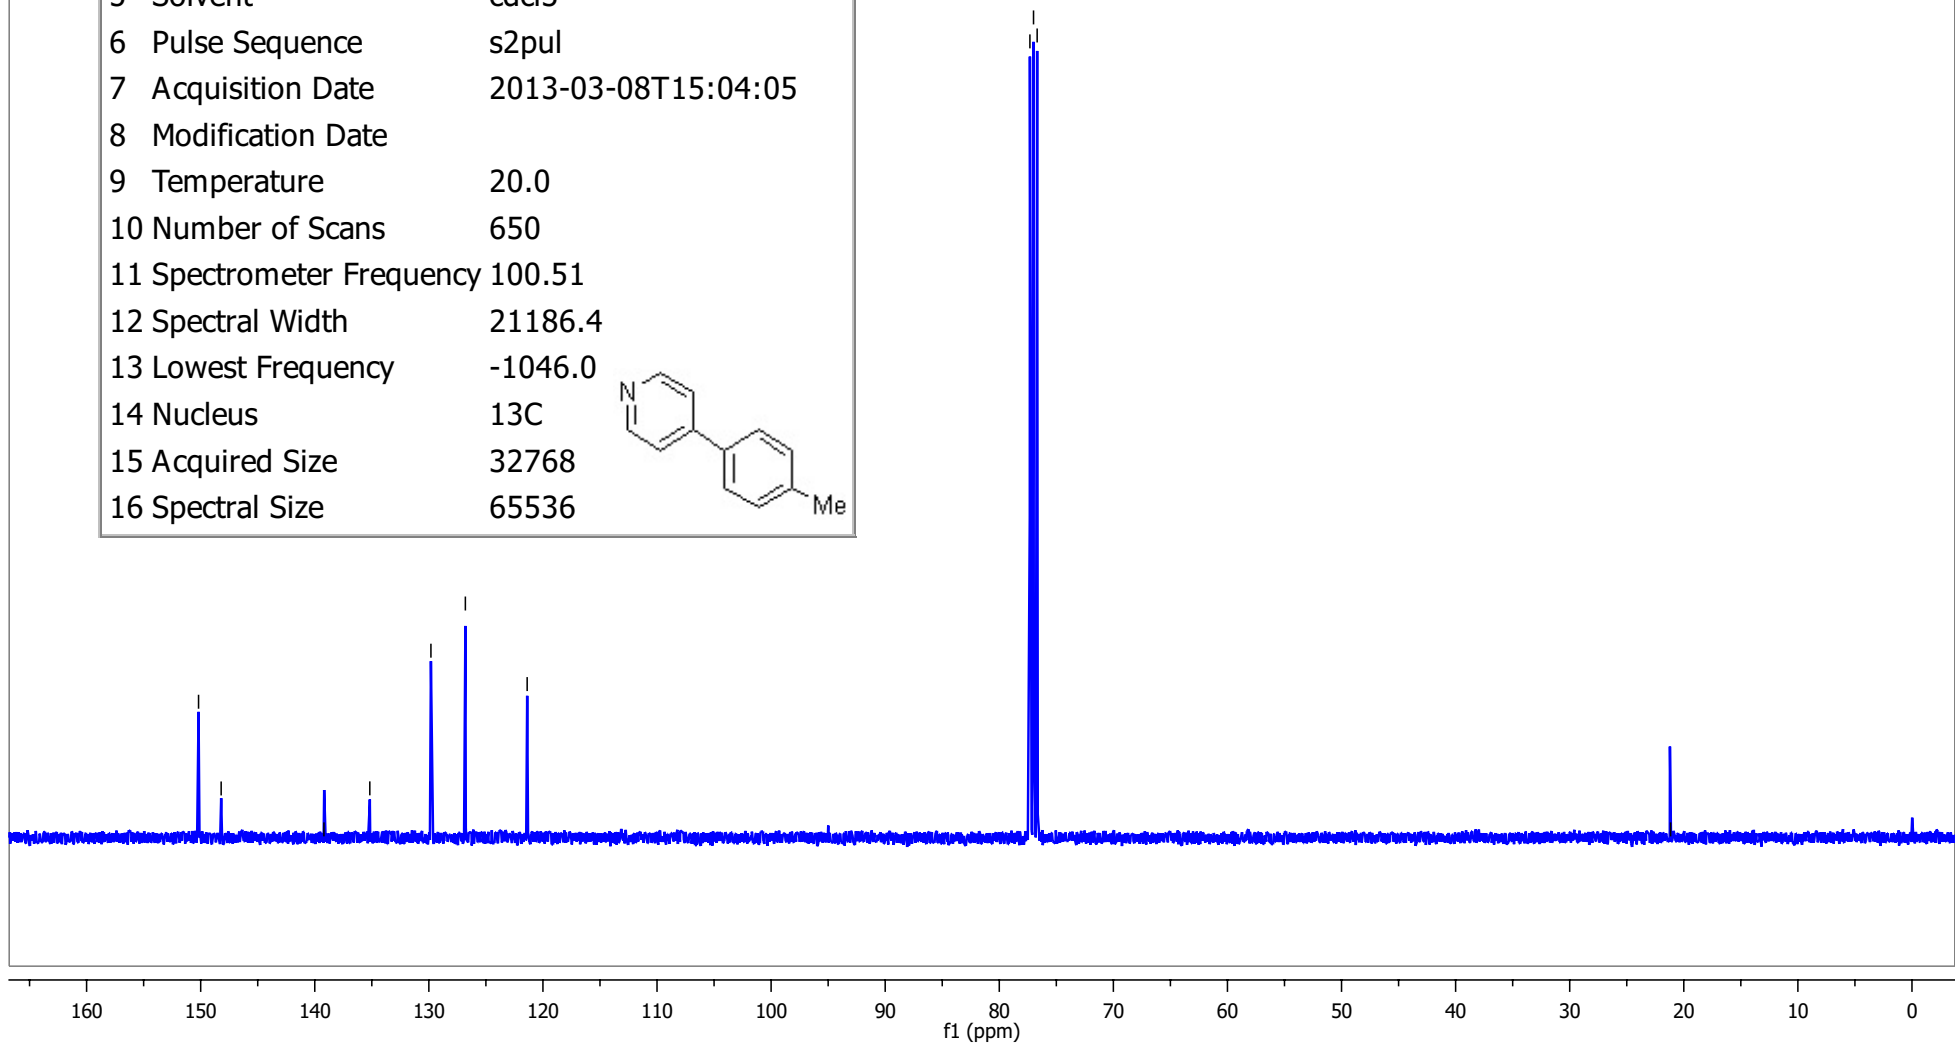

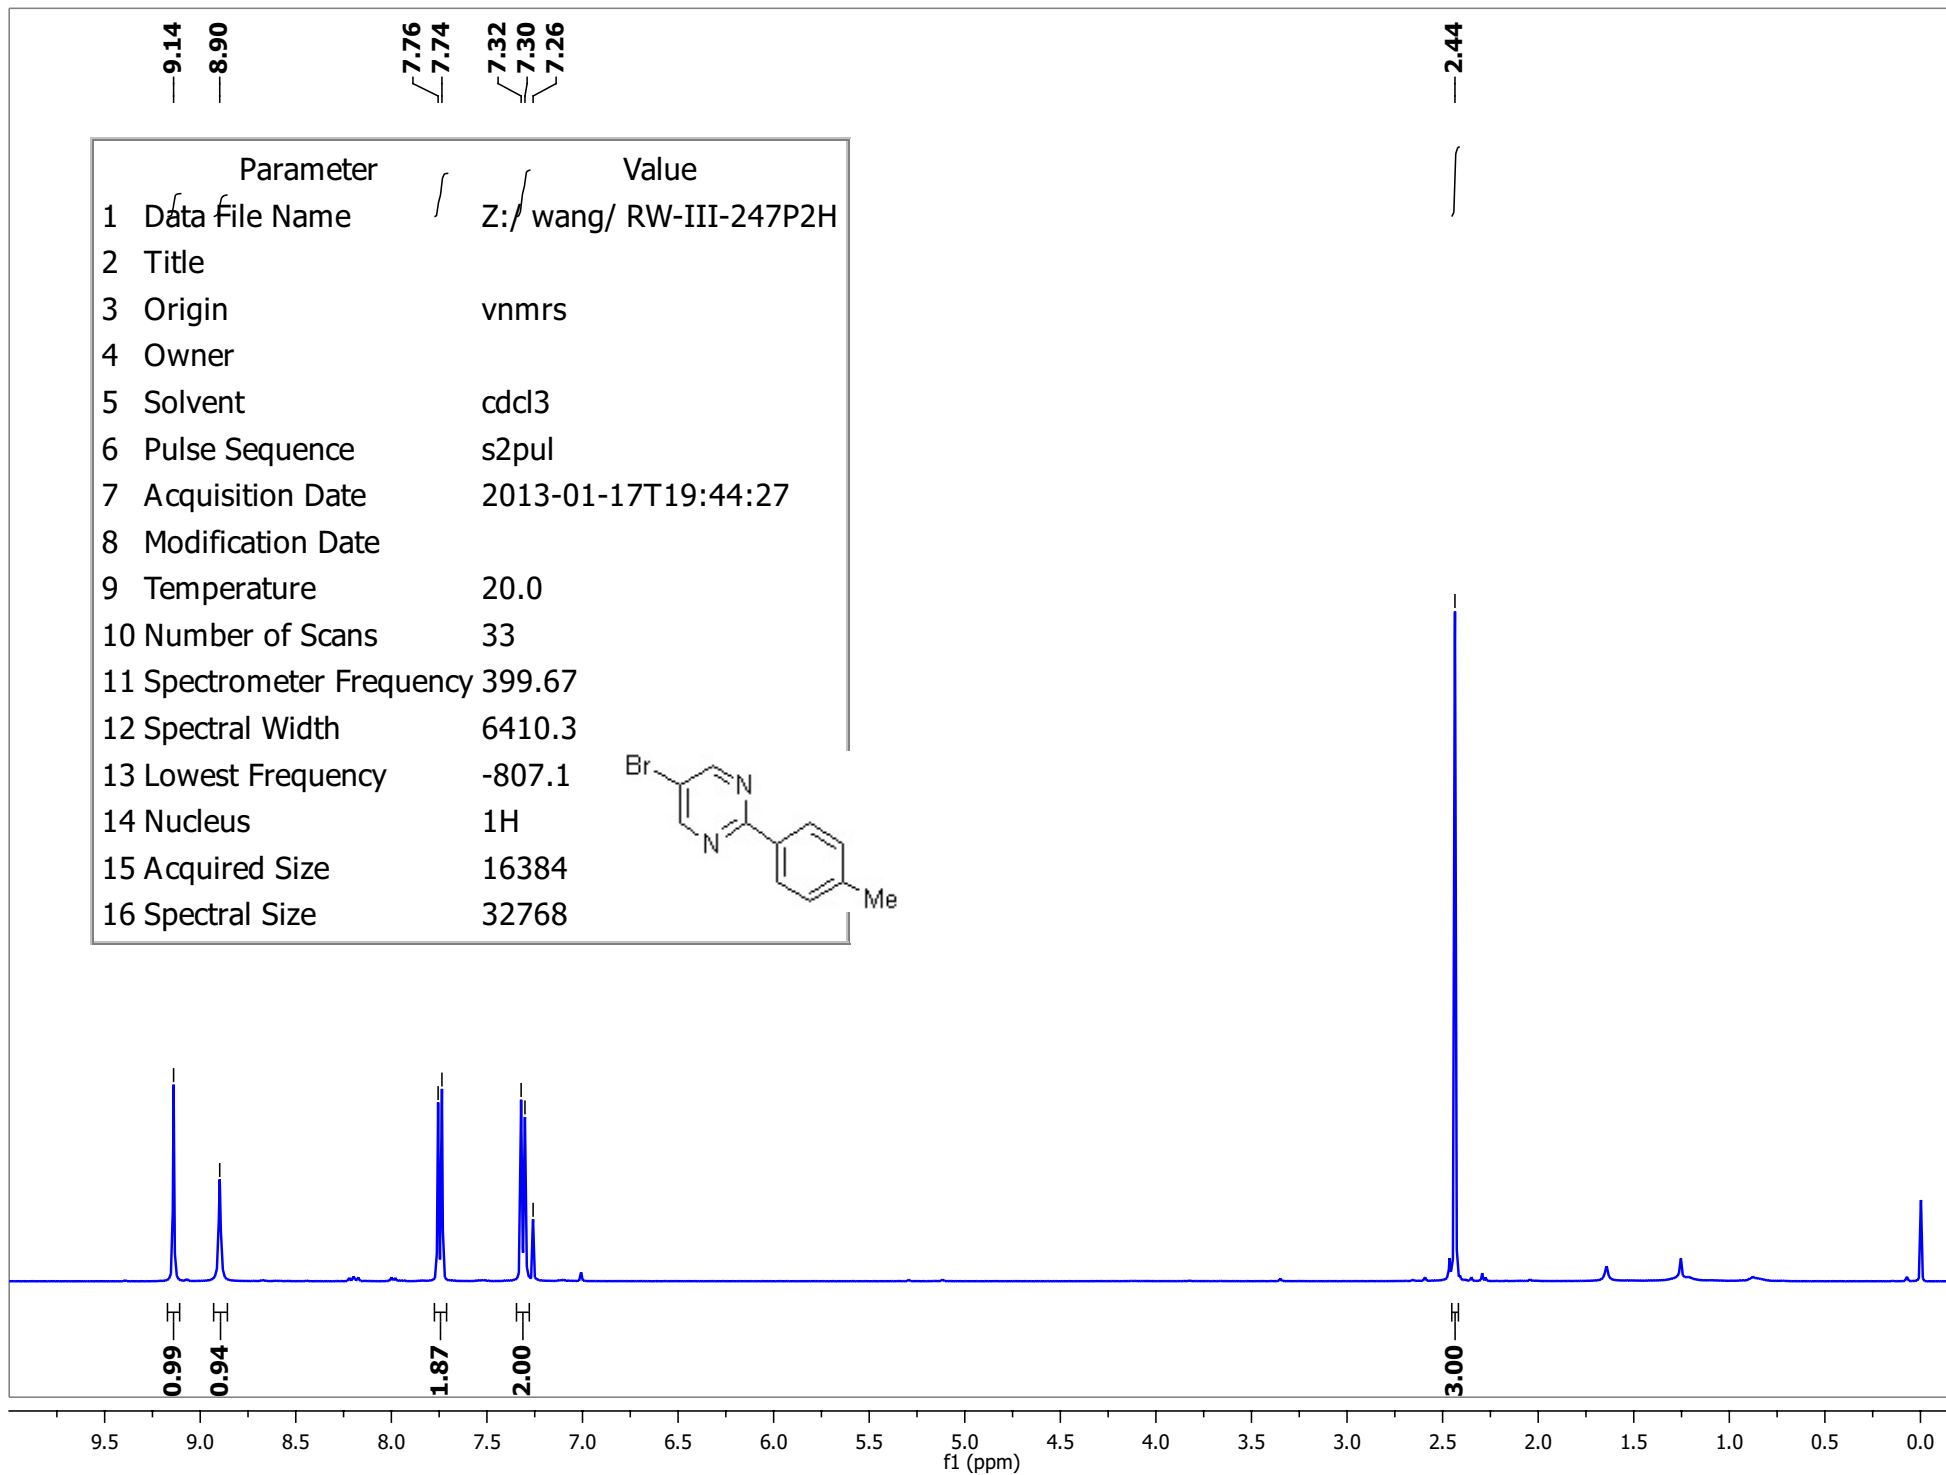



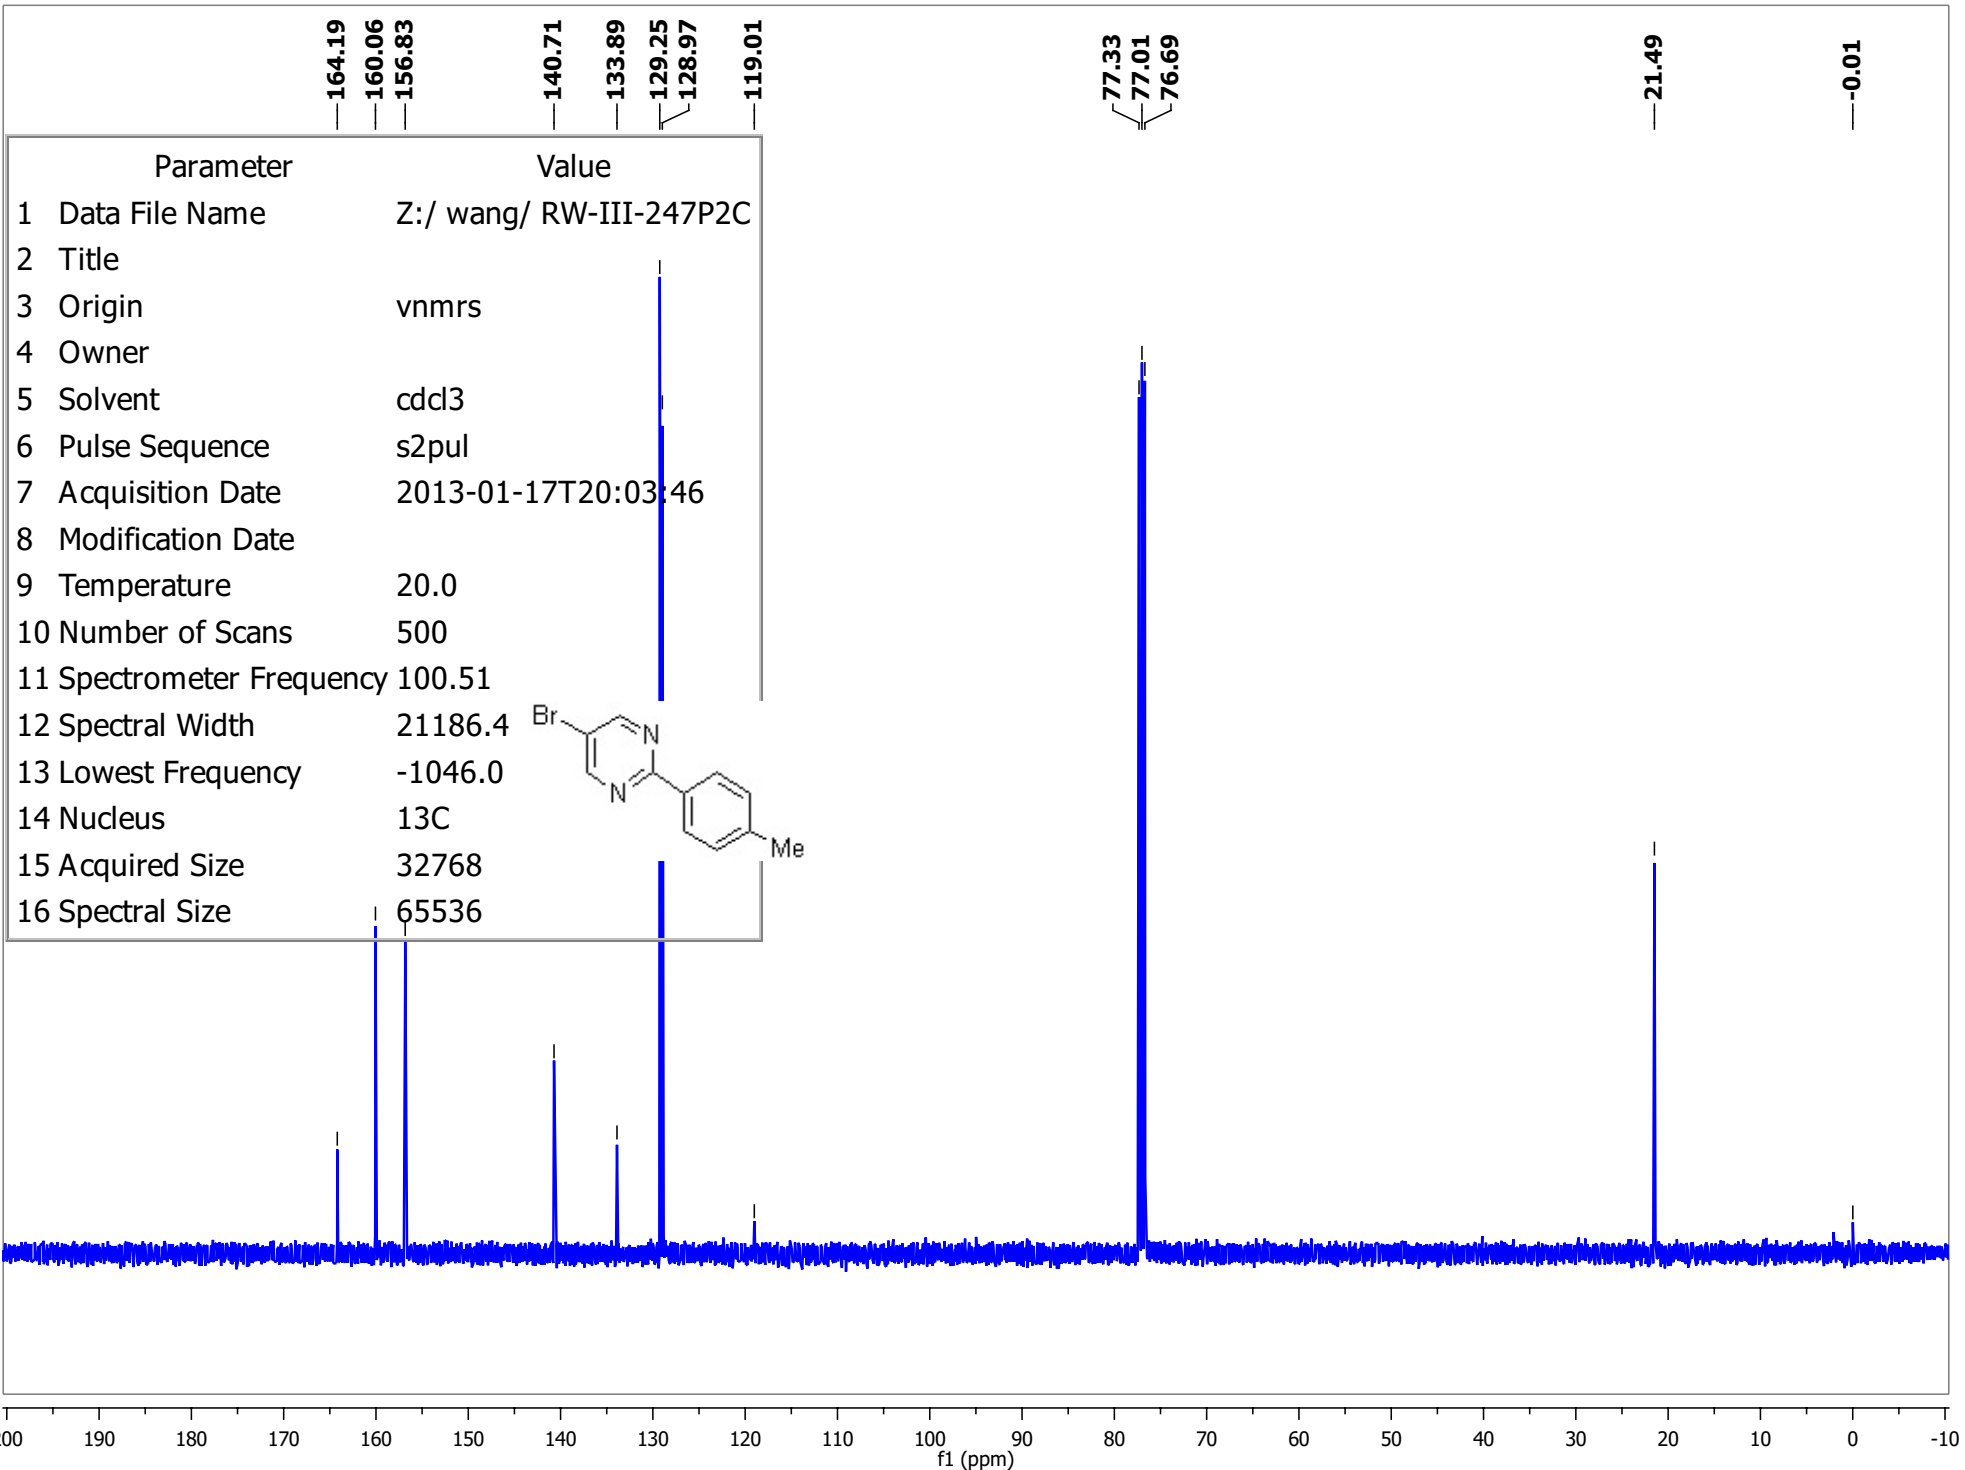

| Parameter                 | Value                   |
|---------------------------|-------------------------|
| 1 Data File Name          | Z:/ wang/ RW-III-247P2C |
| 2 Title                   |                         |
| 3 Origin                  | vnmrs                   |
| 4 Owner                   |                         |
| 5 Solvent                 | cdcl3                   |
| 6 Pulse Sequence          | s2pul                   |
| 7 Acquisition Date        | 2013-01-17T20:03:46     |
| 8 Modification Date       |                         |
| 9 Temperature             | 20.0                    |
| 10 Number of Scans        | 500                     |
| 11 Spectrometer Frequency | 100.51                  |
| 12 Spectral Width         | 21186.4                 |
| 13 Lowest Frequency       | -1046.0                 |
| 14 Nucleus                | 13C                     |
| 15 Acquired Size          | 32768                   |
| 16 Spectral Size          | 65536                   |

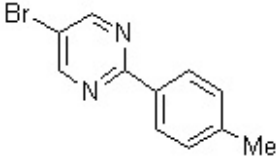

200 190 180 170 160 150 140 130 120 110 100 90 80 70 60 50 40 30 20 10 0 -10  
f1 (ppm)

8.79  
8.78

8.34  
8.32

7.31  
7.29  
7.26  
7.17  
7.16  
7.14

2.43

| Parameter                 | Value                  |
|---------------------------|------------------------|
| 1 Data File Name          | Z:\wang\ RW-III-268P1H |
| 2 Title                   |                        |
| 3 Origin                  | vnms                   |
| 4 Owner                   |                        |
| 5 Solvent                 | cdd3                   |
| 6 Pulse Sequence          | s2pul                  |
| 7 Acquisition Date        | 2013-02-05T23:43:55    |
| 8 Modification Date       |                        |
| 9 Temperature             | 20.0                   |
| 10 Number of Scans        | 33                     |
| 11 Spectrometer Frequency | 399.67                 |
| 12 Spectral Width         | 6410.3                 |
| 13 Lowest Frequency       | -807.1                 |
| 14 Nucleus                | 1H                     |
| 15 Acquired Size          | 16384                  |
| 16 Spectral Size          | 32768                  |

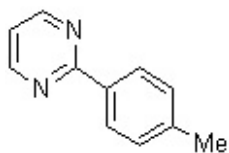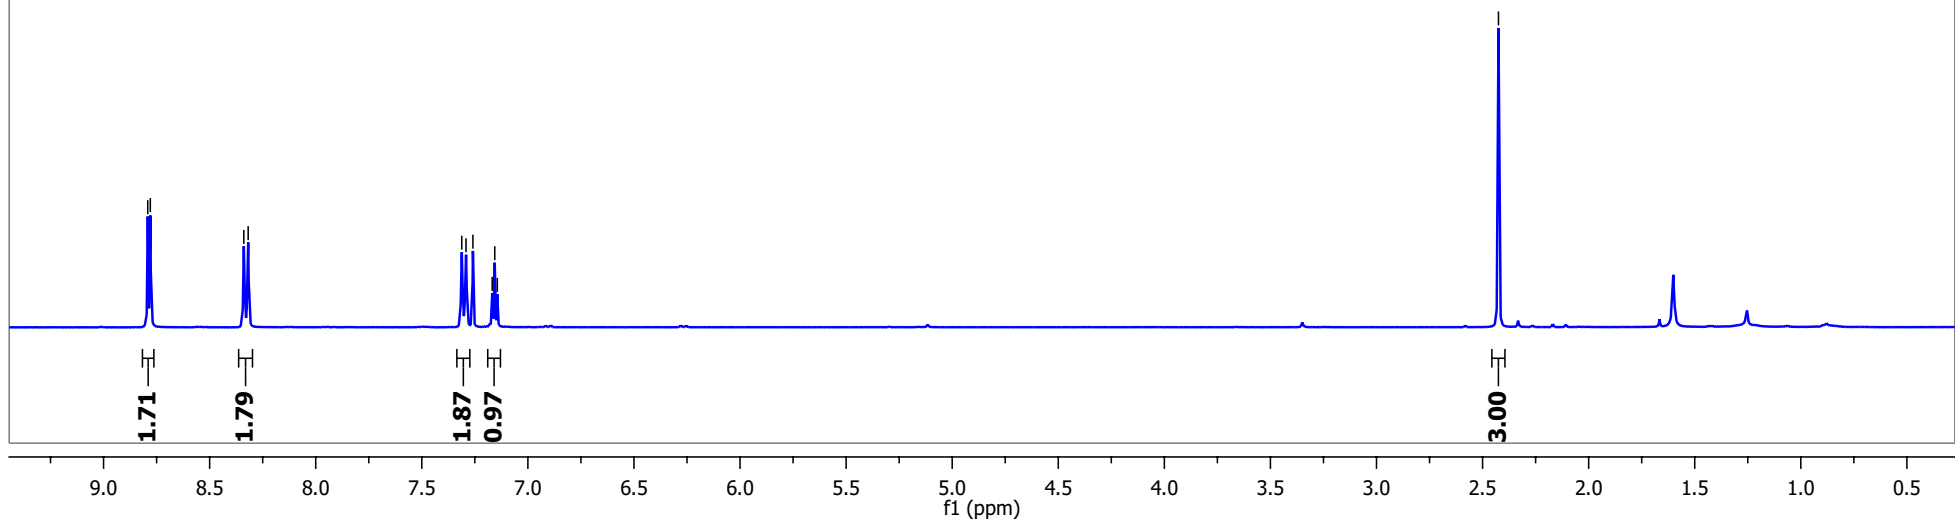

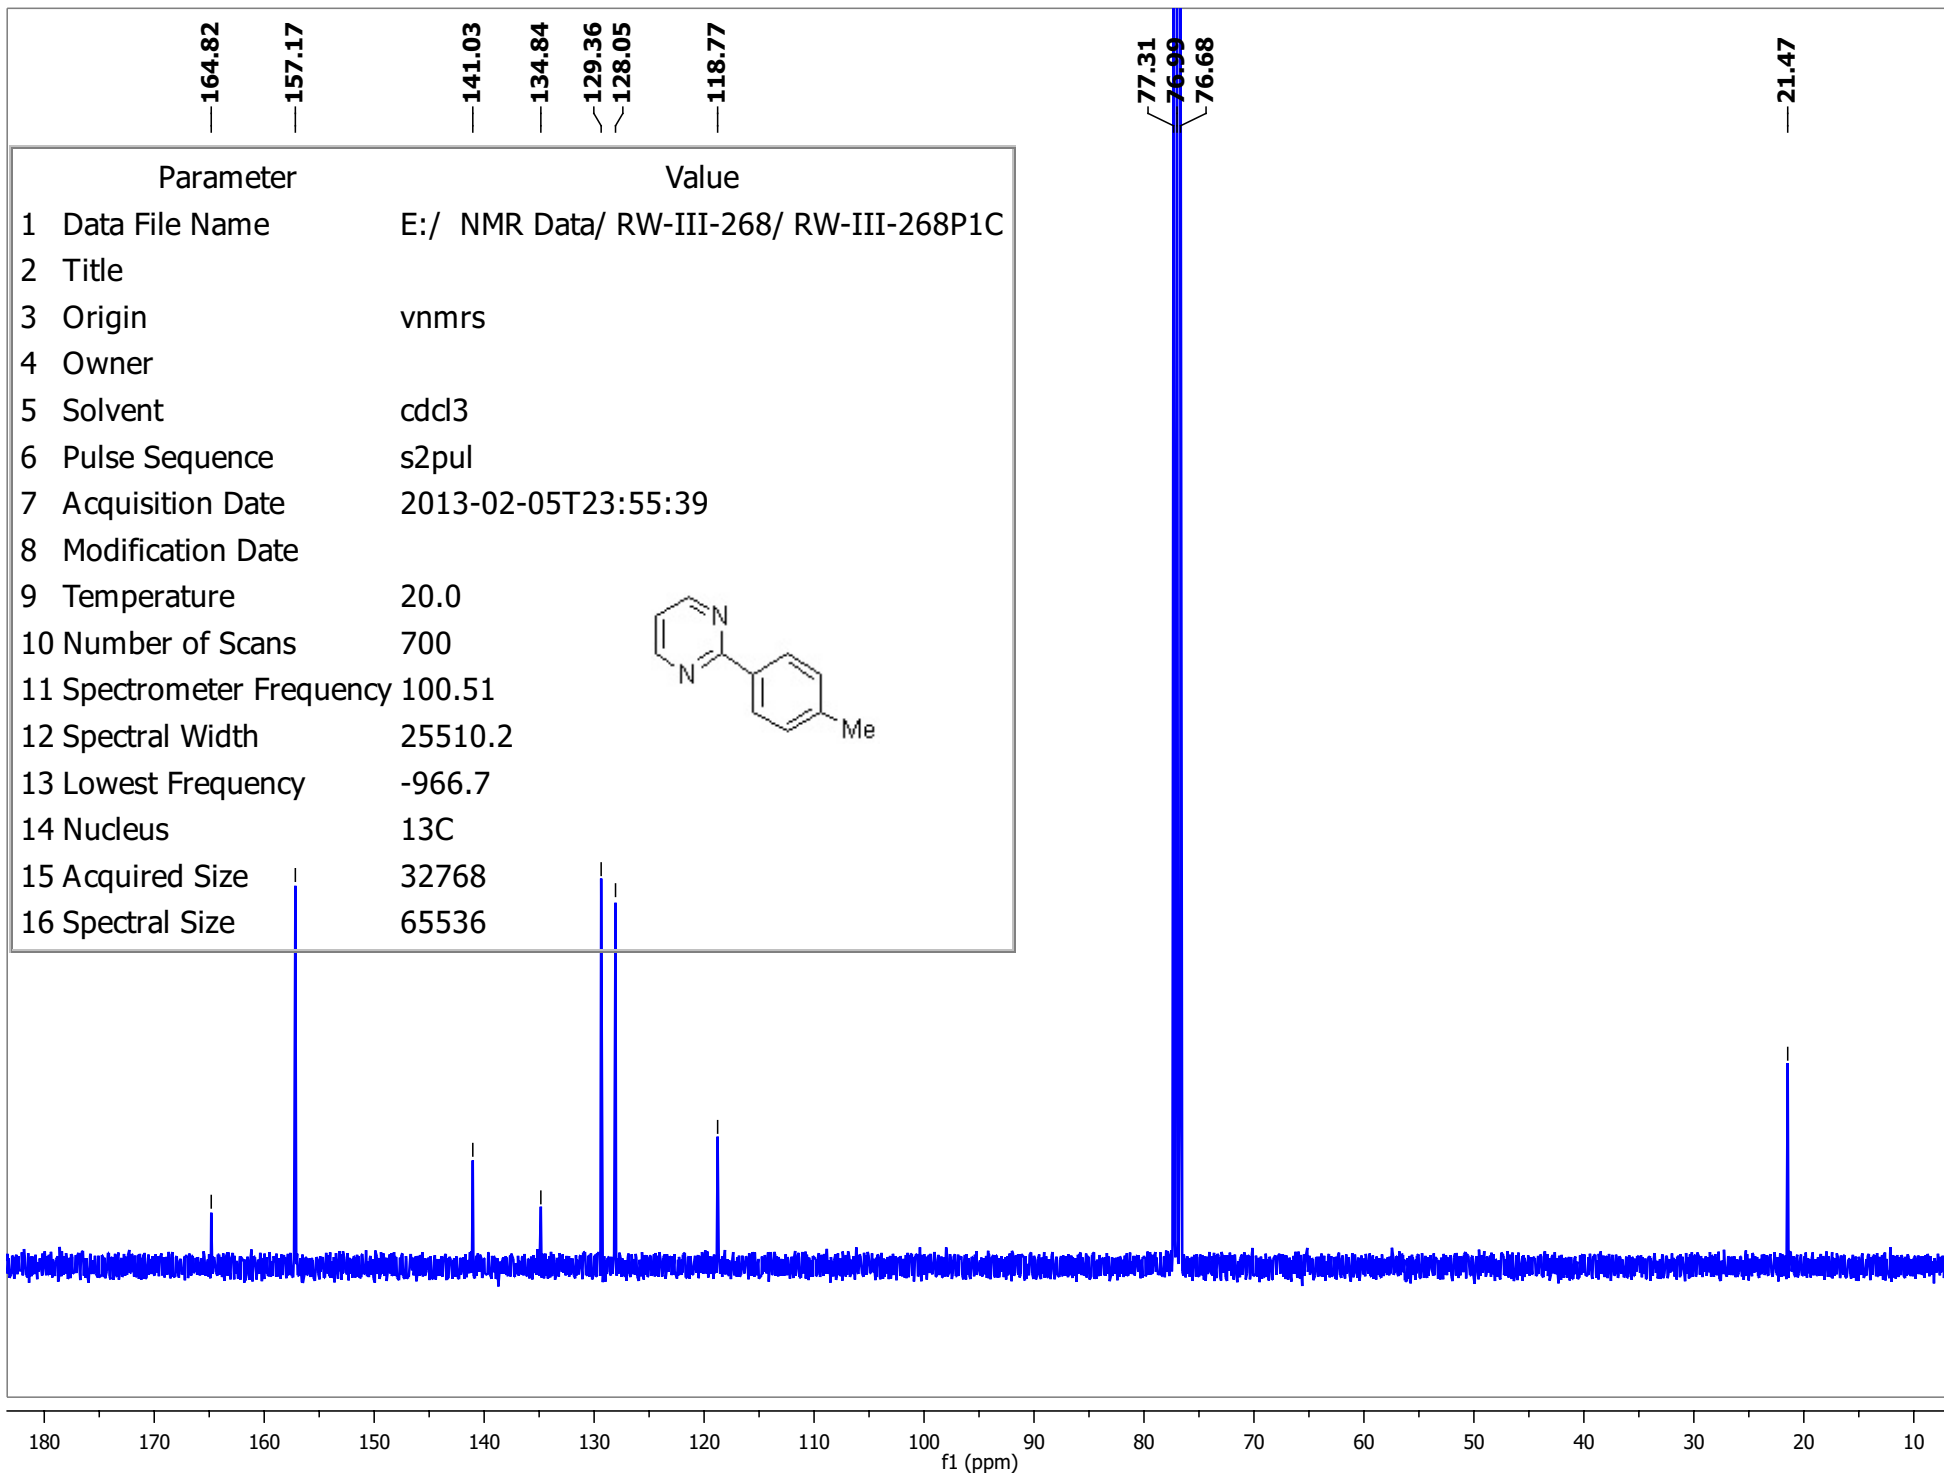

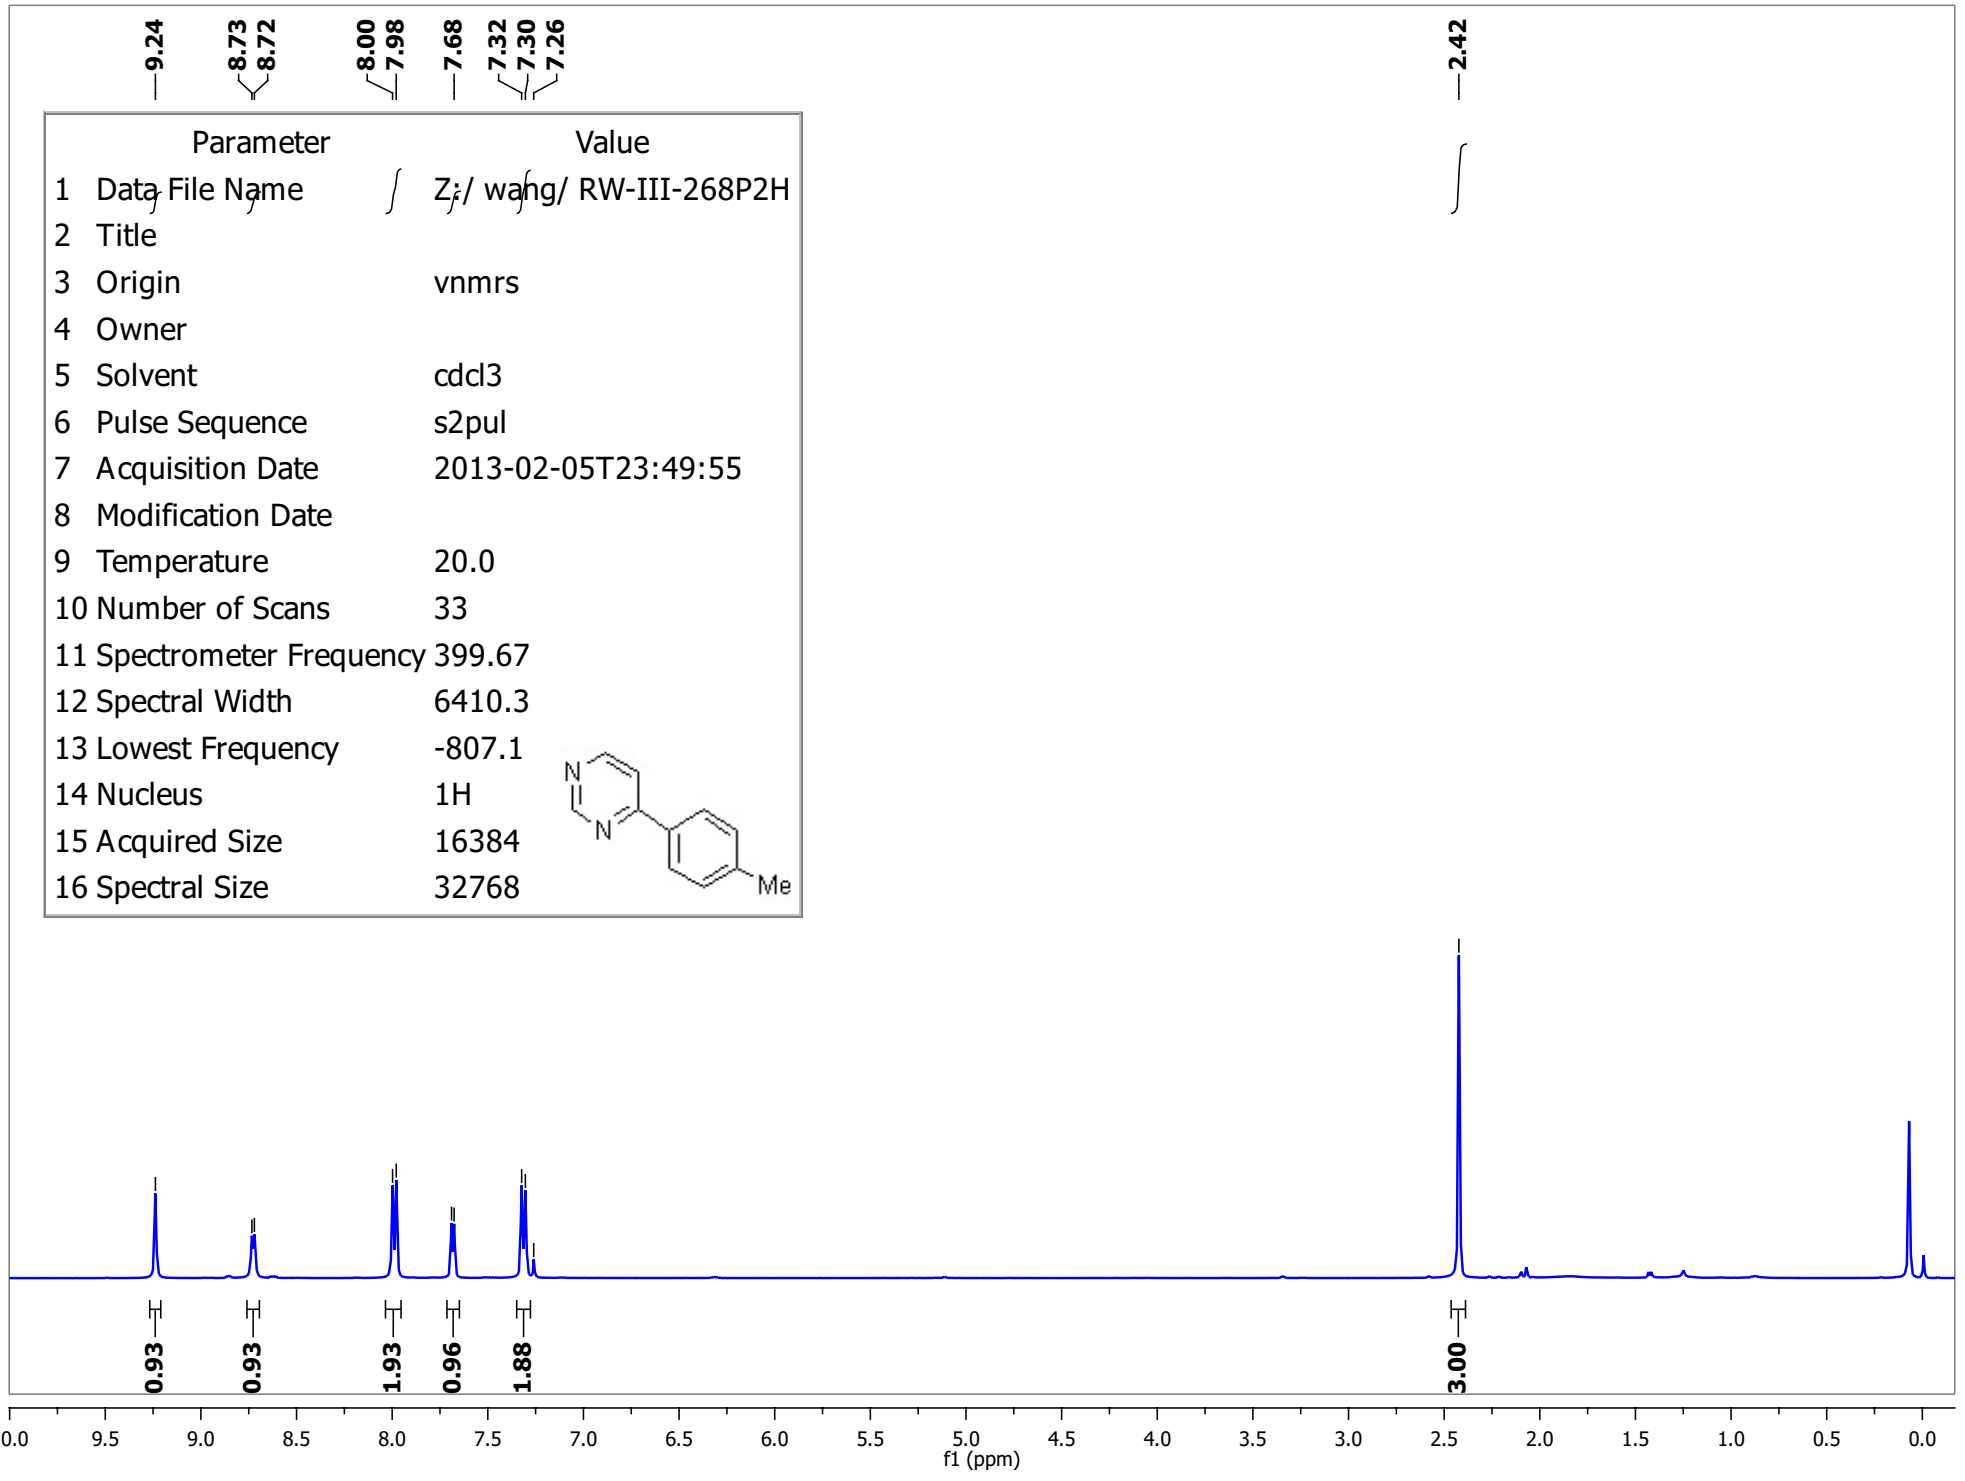

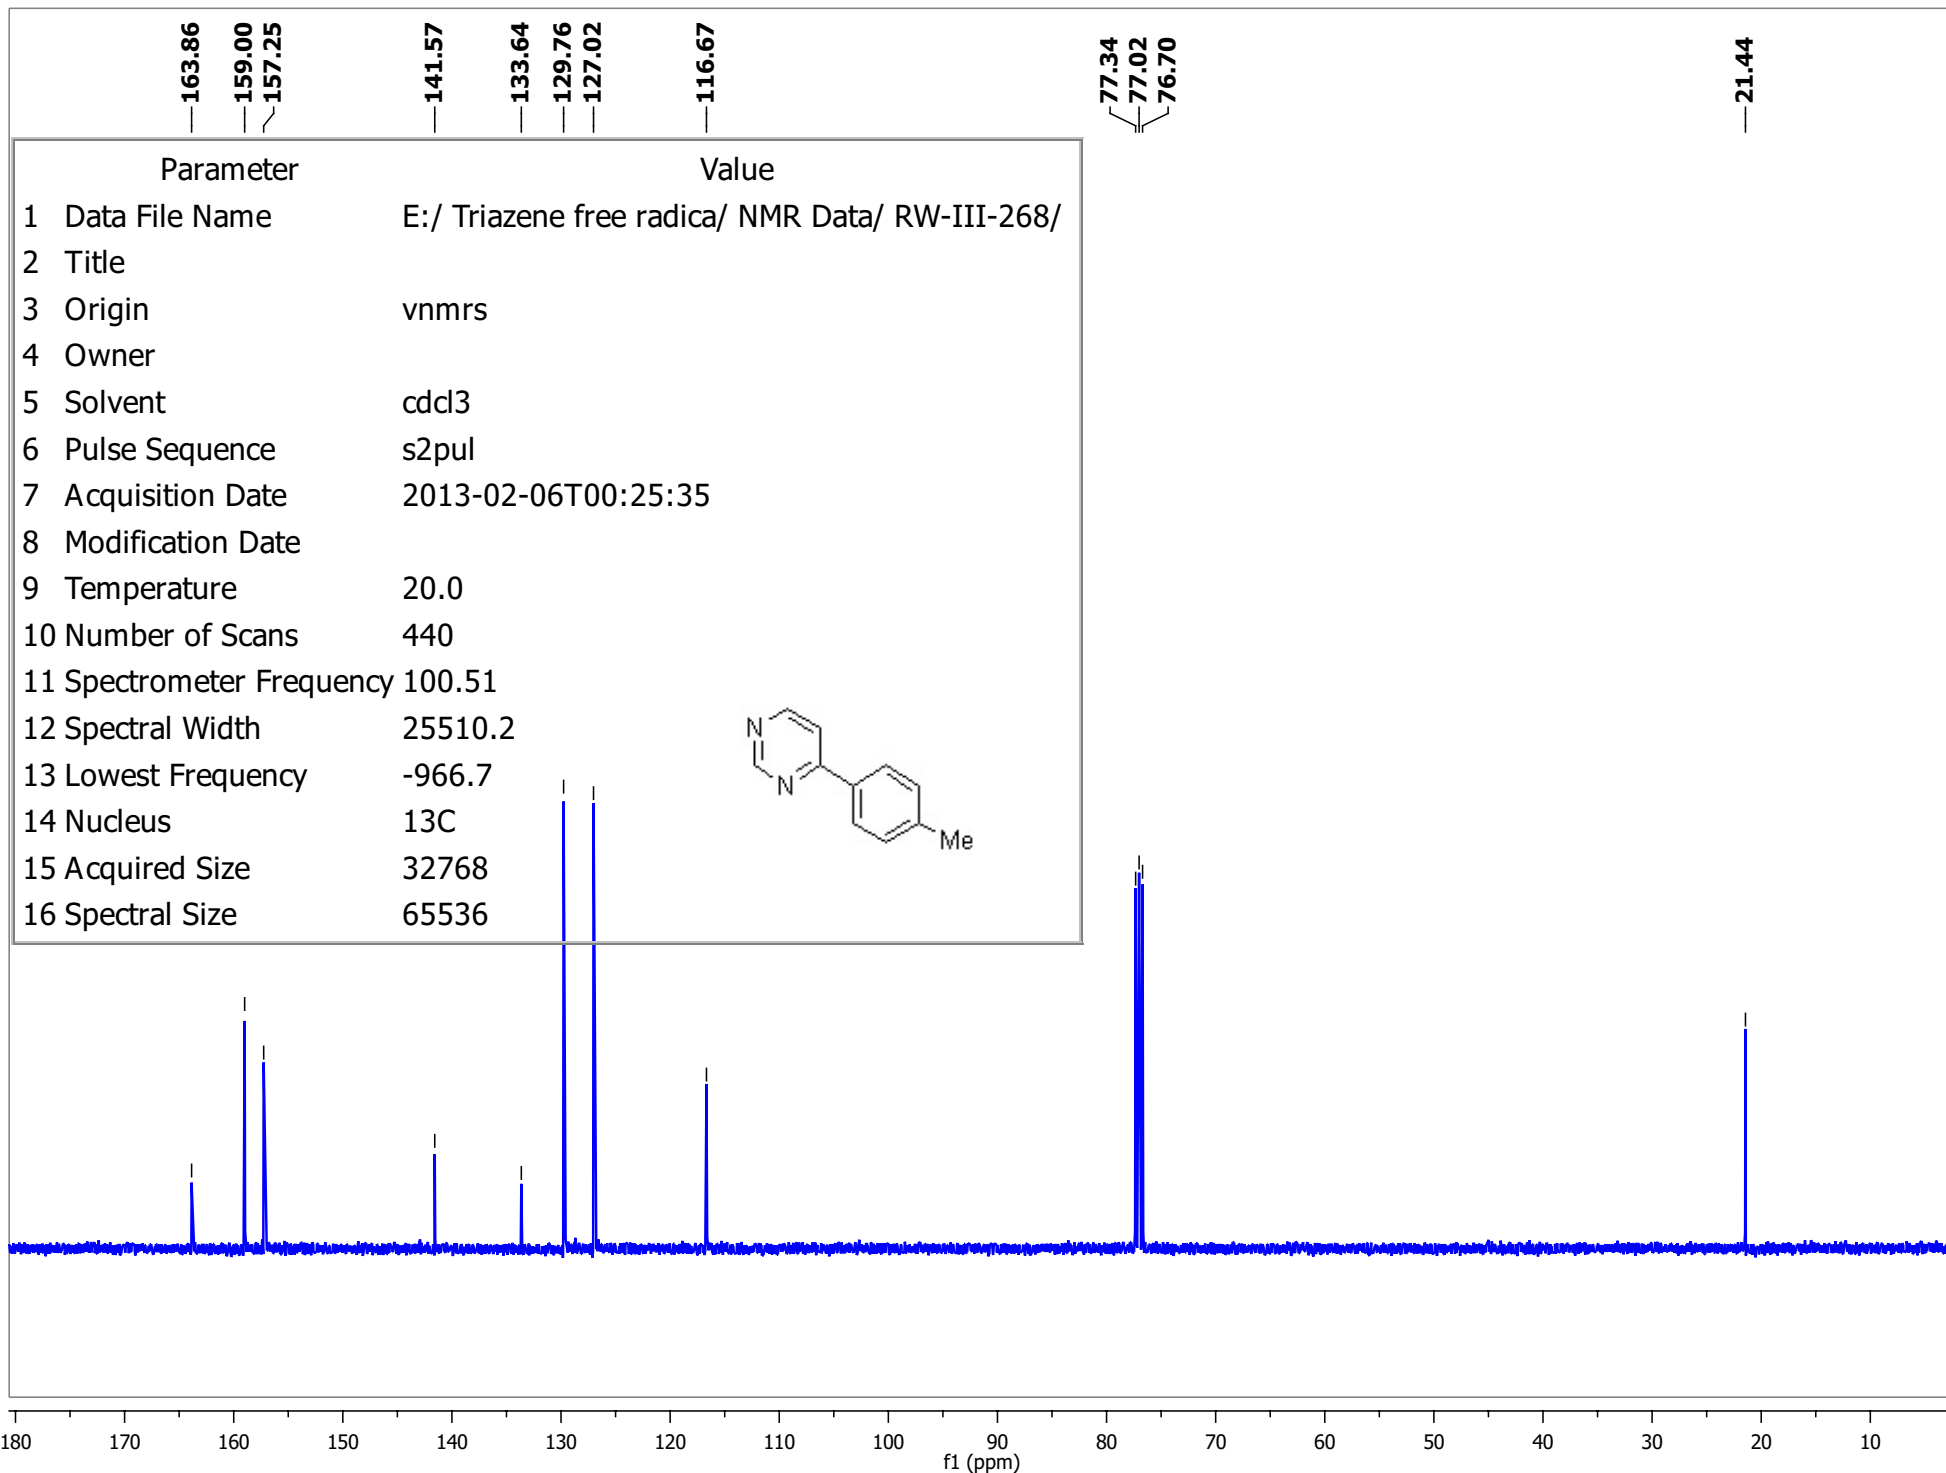

9.14  
9.13

7.99  
7.97  
7.85  
7.83  
7.54  
7.52  
7.51  
7.50  
7.35  
7.33  
7.26

2.43

| Parameter                 | Value                 |
|---------------------------|-----------------------|
| 1 Data File Name          | Z:/ wang/ RW-III-265H |
| 2 Title                   |                       |
| 3 Origin                  | vnmrs                 |
| 4 Owner                   |                       |
| 5 Solvent                 | cdcl3                 |
| 6 Pulse Sequence          | s2pul                 |
| 7 Acquisition Date        | 2013-02-05T22:46:16   |
| 8 Modification Date       |                       |
| 9 Temperature             | 20.0                  |
| 10 Number of Scans        | 33                    |
| 11 Spectrometer Frequency | 399.67                |
| 12 Spectral Width         | 6410.3                |
| 13 Lowest Frequency       | -807.1                |
| 14 Nucleus                | 1H                    |
| 15 Acquired Size          | 16384                 |
| 16 Spectral Size          | 32768                 |

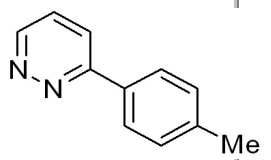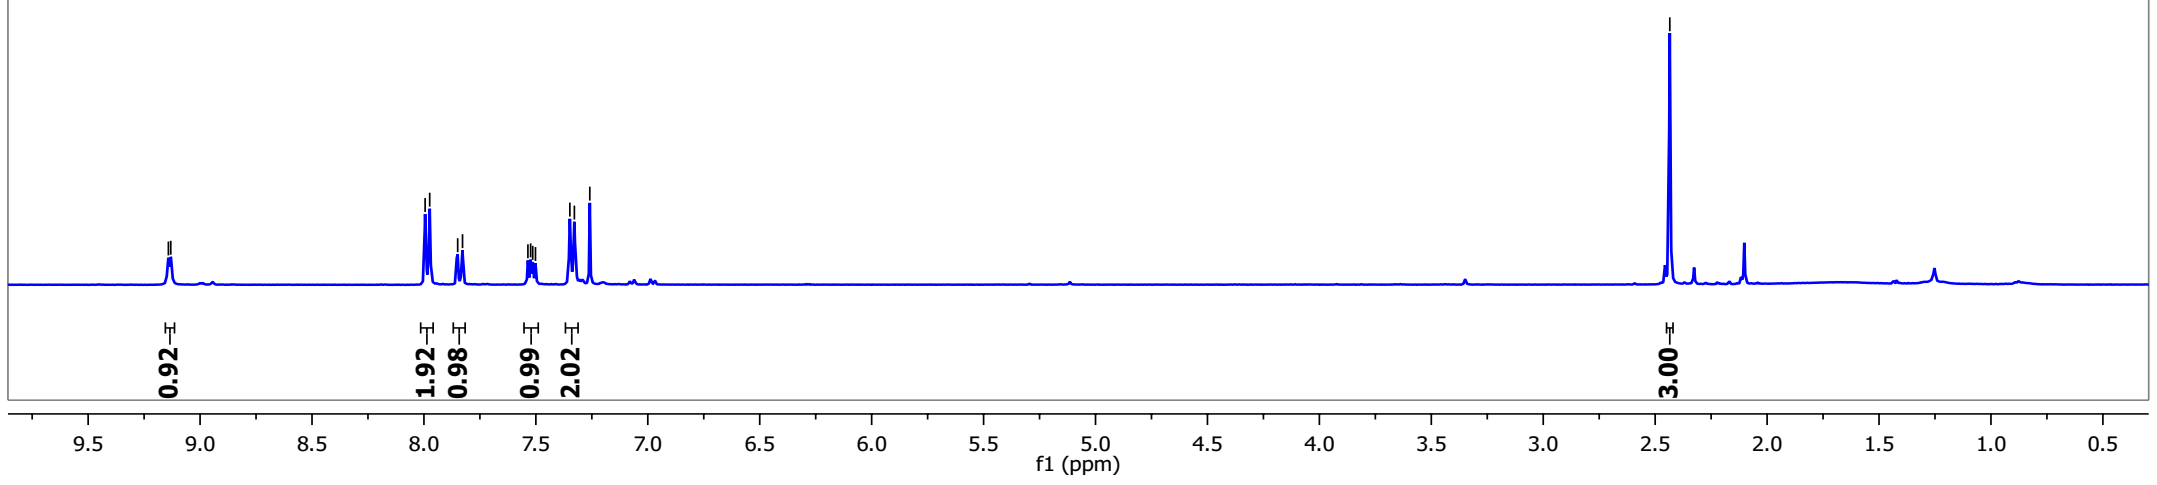

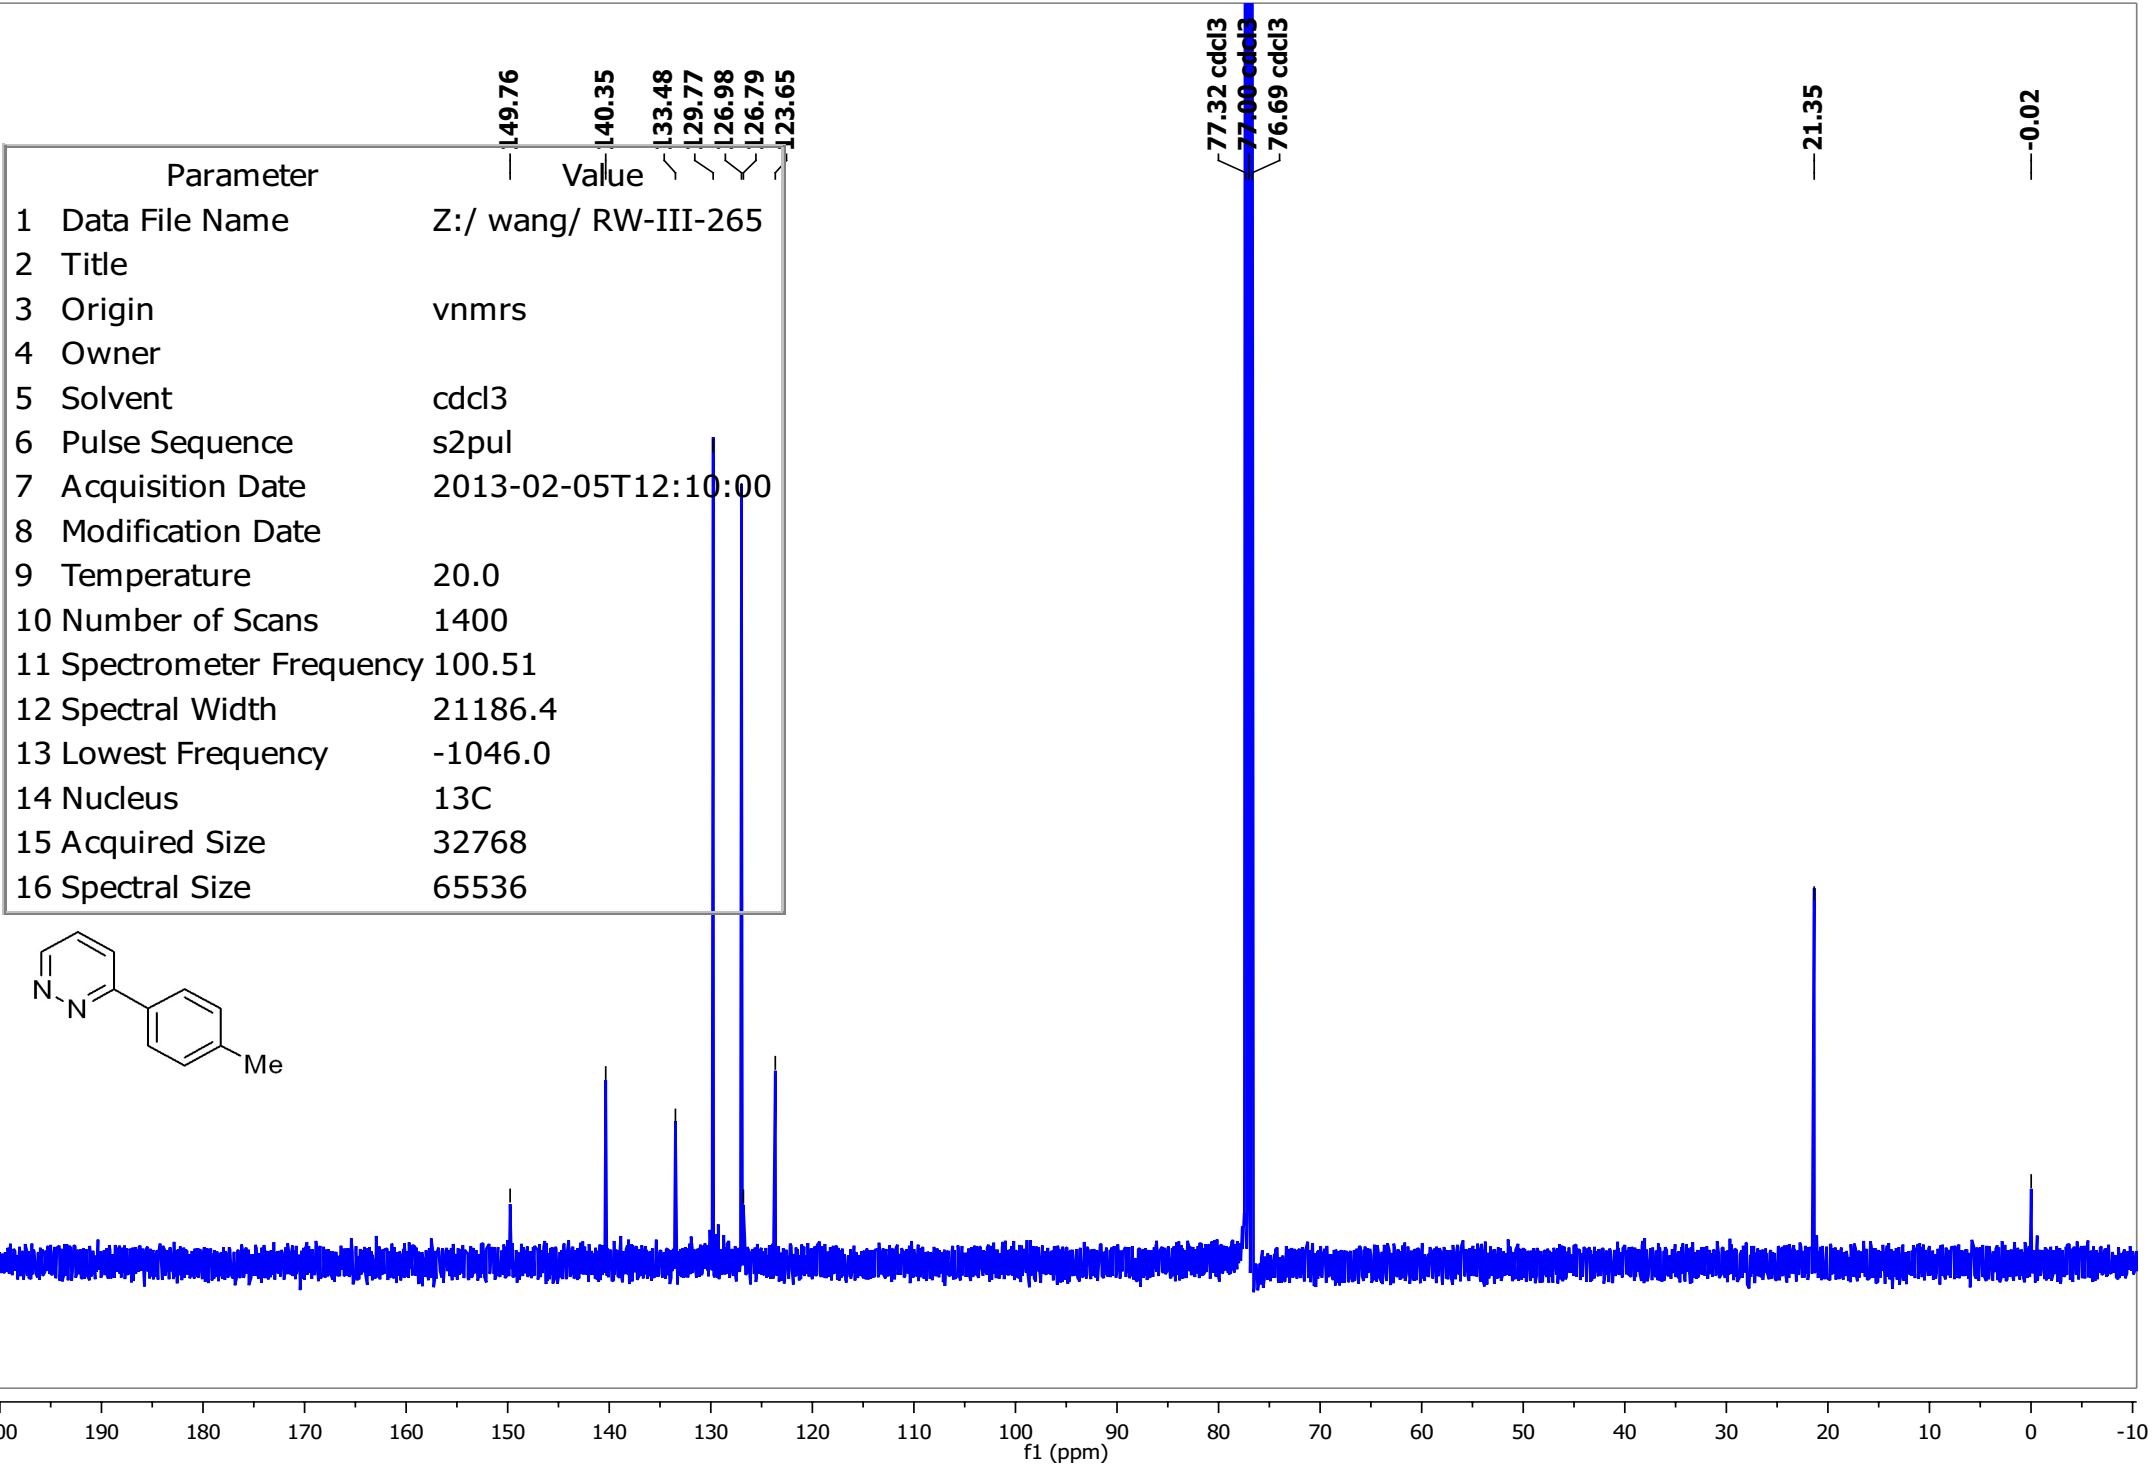

9.46  
9.20  
9.19  
7.64  
7.63  
7.63  
7.62  
7.59  
7.57  
7.36  
7.34  
7.26  
2.44

| Parameter                 | Value                |
|---------------------------|----------------------|
| 1 Data File Name          | Z:/ wang/ RW-III-265 |
| 2 Title                   |                      |
| 3 Origin                  | vnmrs                |
| 4 Owner                   |                      |
| 5 Solvent                 | cdcl3                |
| 6 Pulse Sequence          | s2pul                |
| 7 Acquisition Date        | 2013-02-11T23:29:32  |
| 8 Modification Date       |                      |
| 9 Temperature             | 20.0                 |
| 10 Number of Scans        | 33                   |
| 11 Spectrometer Frequency | 399.67               |
| 12 Spectral Width         | 6410.3               |
| 13 Lowest Frequency       | -807.1               |
| 14 Nucleus                | 1H                   |
| 15 Acquired Size          | 16384                |
| 16 Spectral Size          | 32768                |

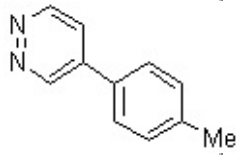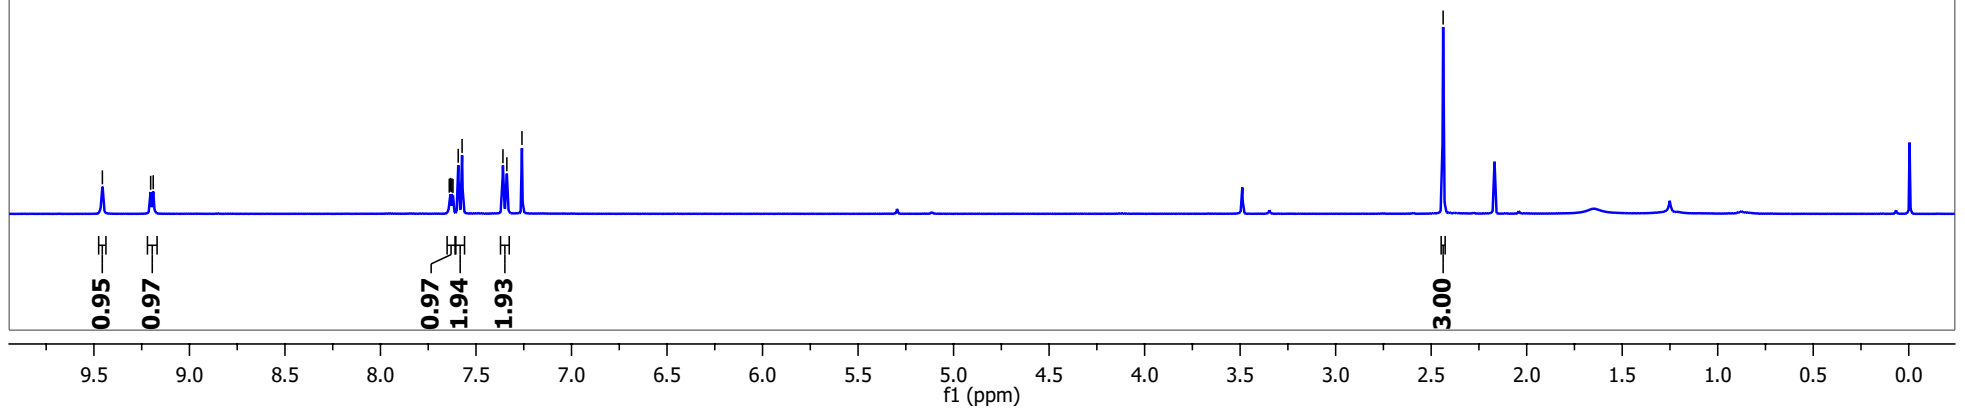



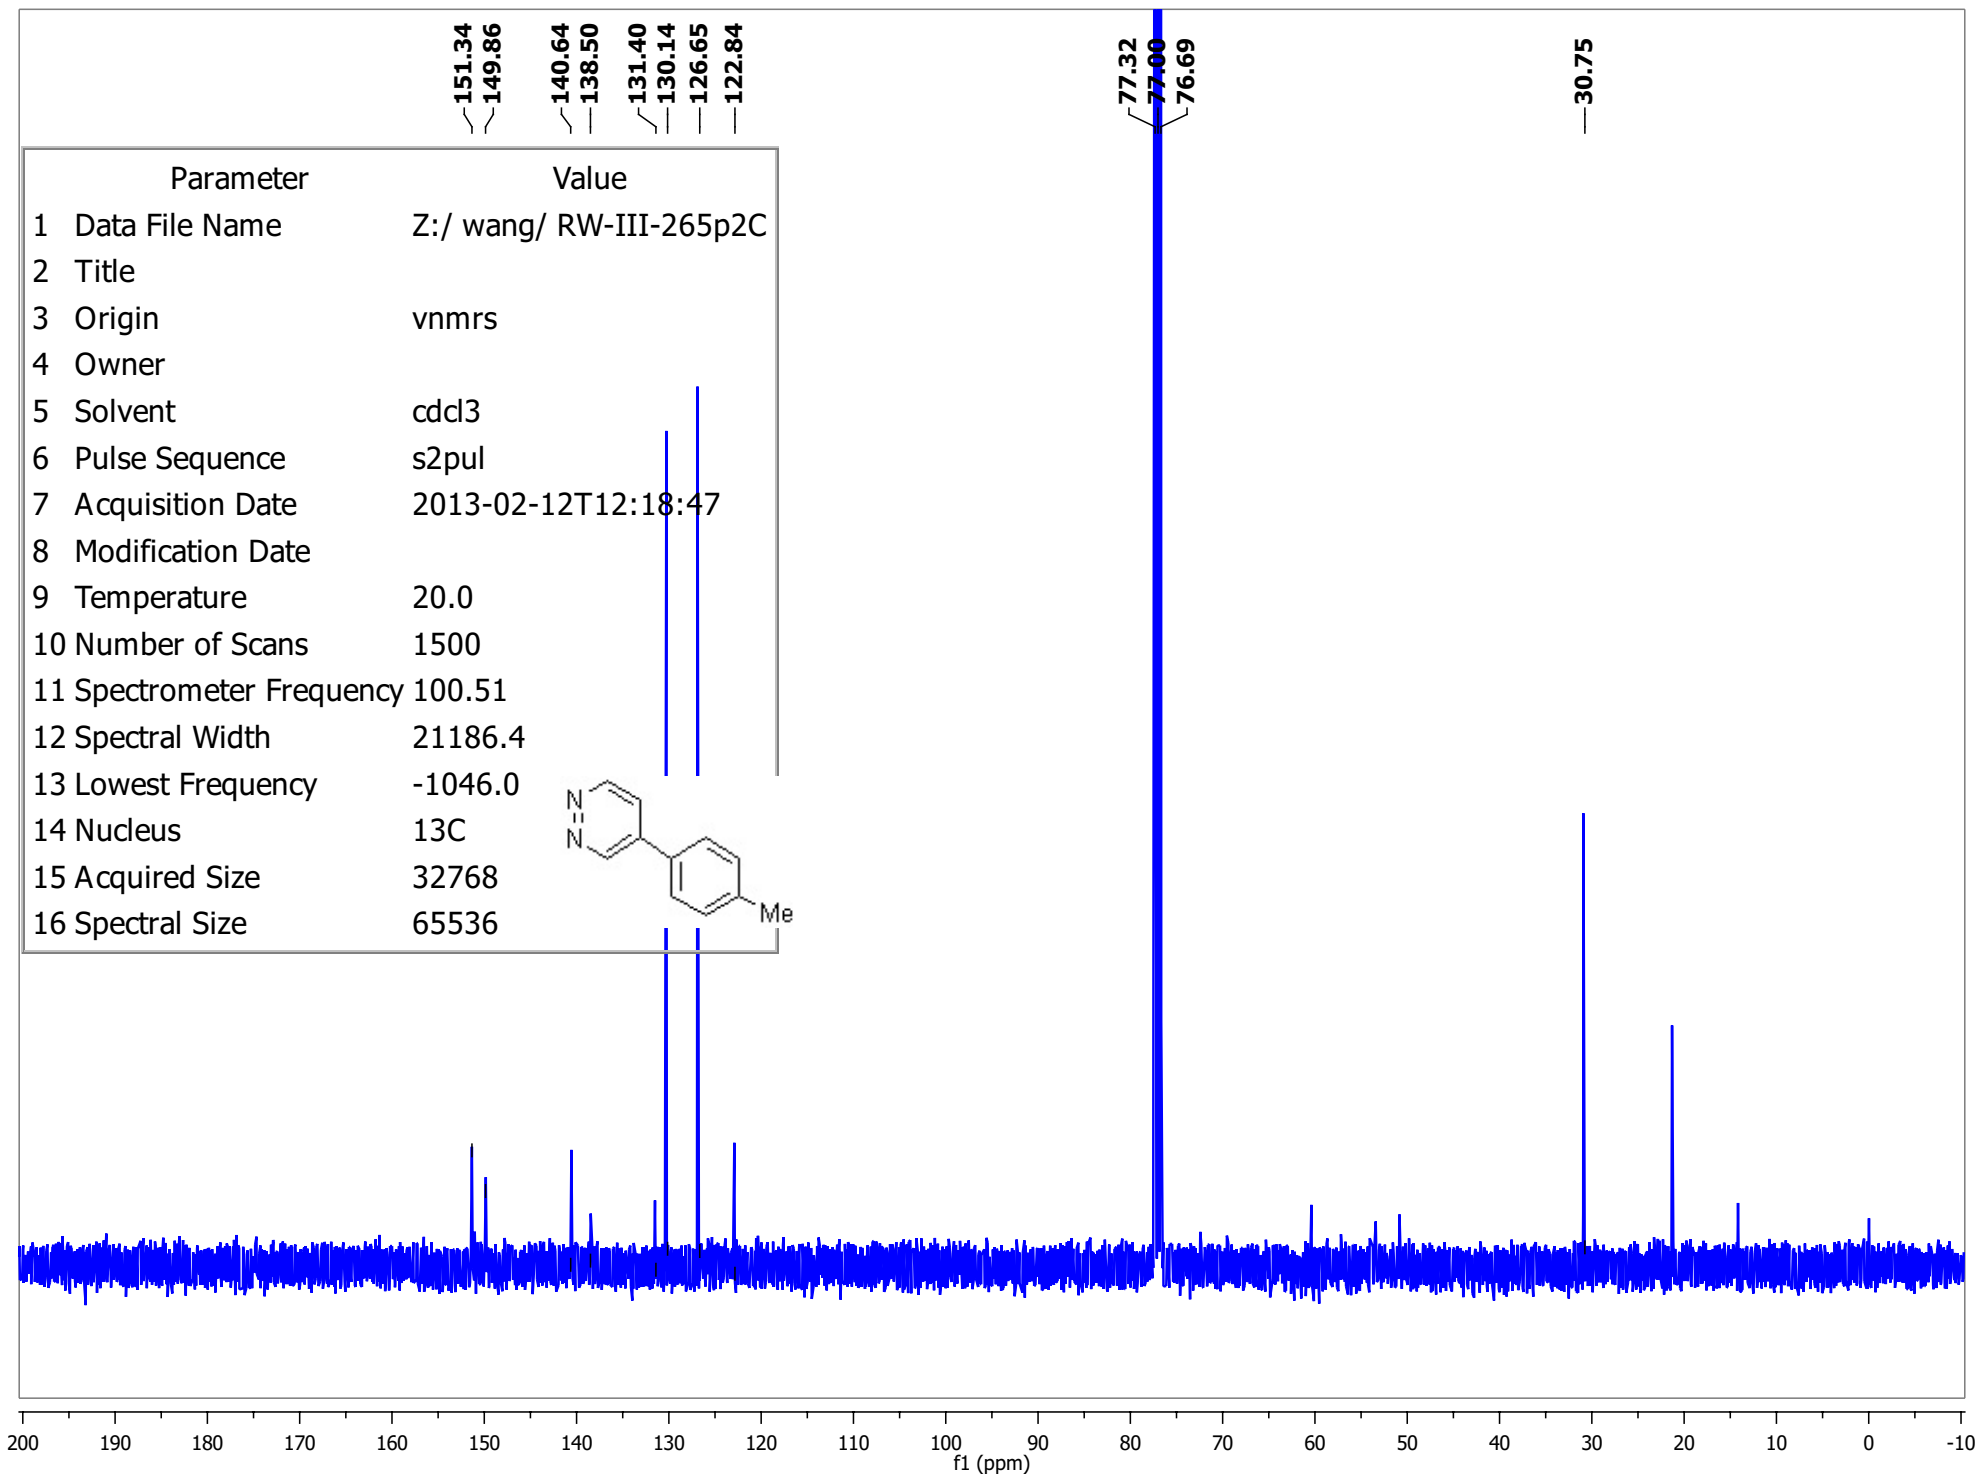

\_pslabel\_01

9.11  
9.11  
9.10  
9.10  
8.14  
8.14  
8.12  
8.12  
7.97  
7.95  
7.77  
7.76  
7.75  
7.74  
7.38  
7.36

4.89

3.31  
3.31  
3.30  
3.30  
3.30

2.42

| Parameter                 | Value                                                   |
|---------------------------|---------------------------------------------------------|
| 1 Data File Name          | X:/ wang/ RW-III-287P1_20130215_01/_pslabel_01.fid/ fid |
| 2 Title                   | _pslabel_01                                             |
| 3 Comment                 |                                                         |
| 4 Origin                  | Varian                                                  |
| 5 Spectrometer            | vmrms                                                   |
| 6 Solvent                 | cd3od                                                   |
| 7 Temperature             | 20.0                                                    |
| 8 Pulse Sequence          | s2pul                                                   |
| 9 Experiment              | 1D                                                      |
| 10 Relaxation Delay       | 1.0000                                                  |
| 11 Acquisition Time       | 2.5559                                                  |
| 12 Acquisition Date       | 2013-02-15T03:36:28                                     |
| 13 Spectrometer Frequency | 399.67                                                  |
| 14 Nucleus                | 1H                                                      |

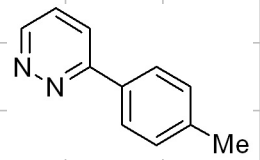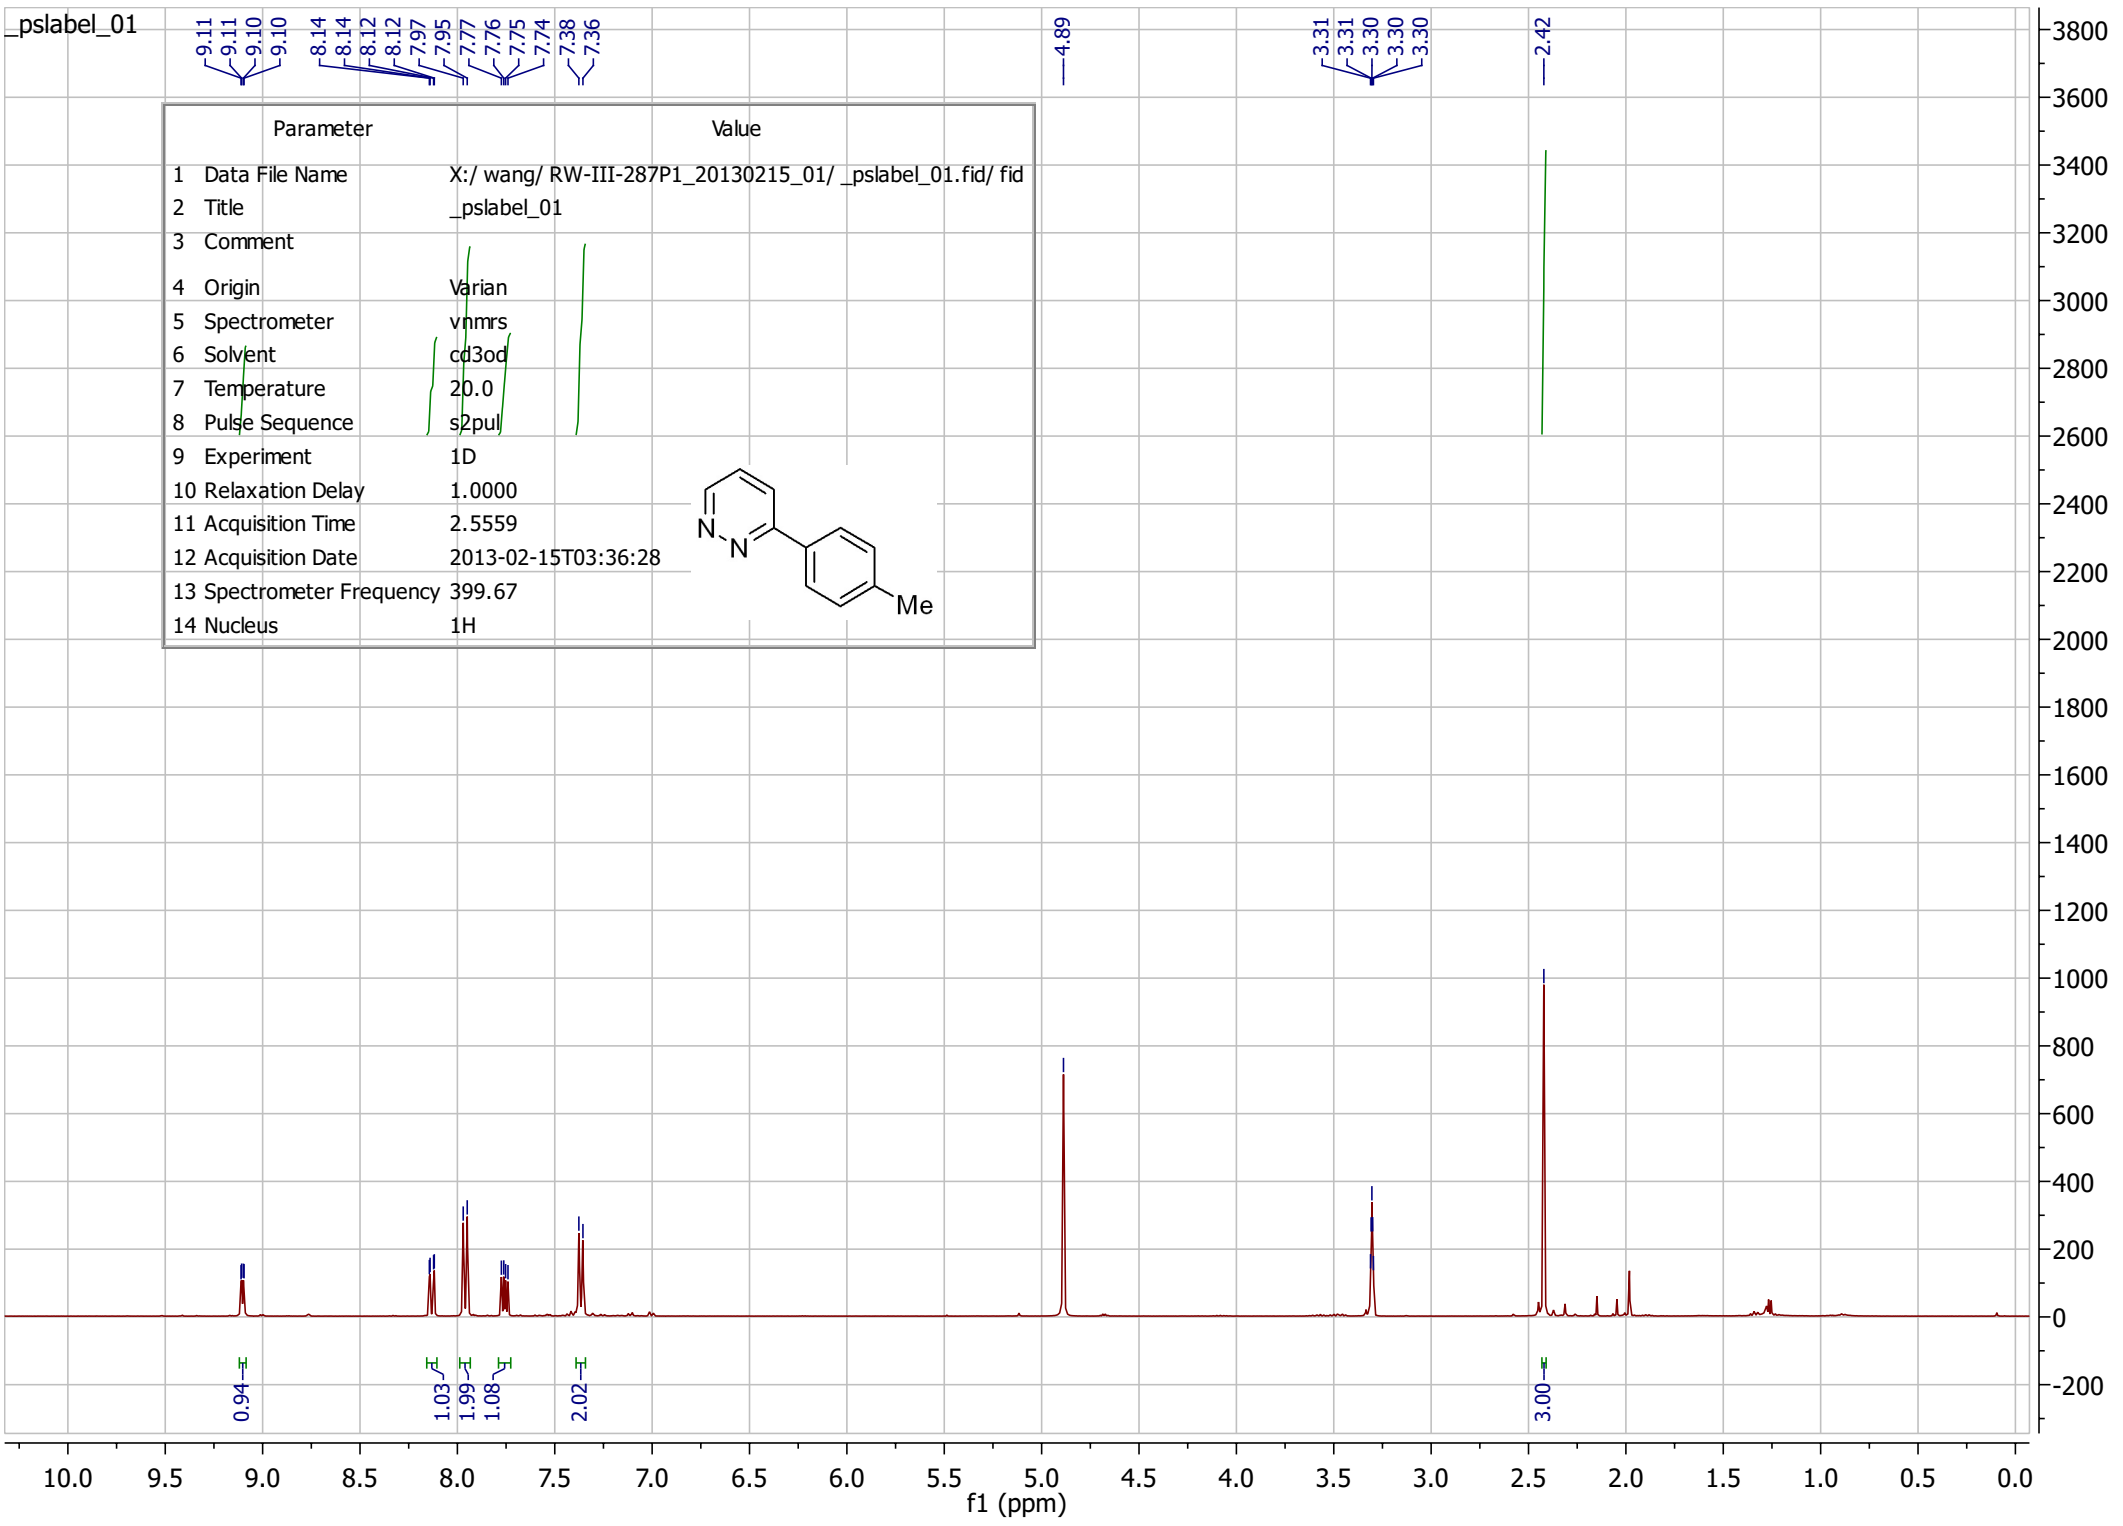

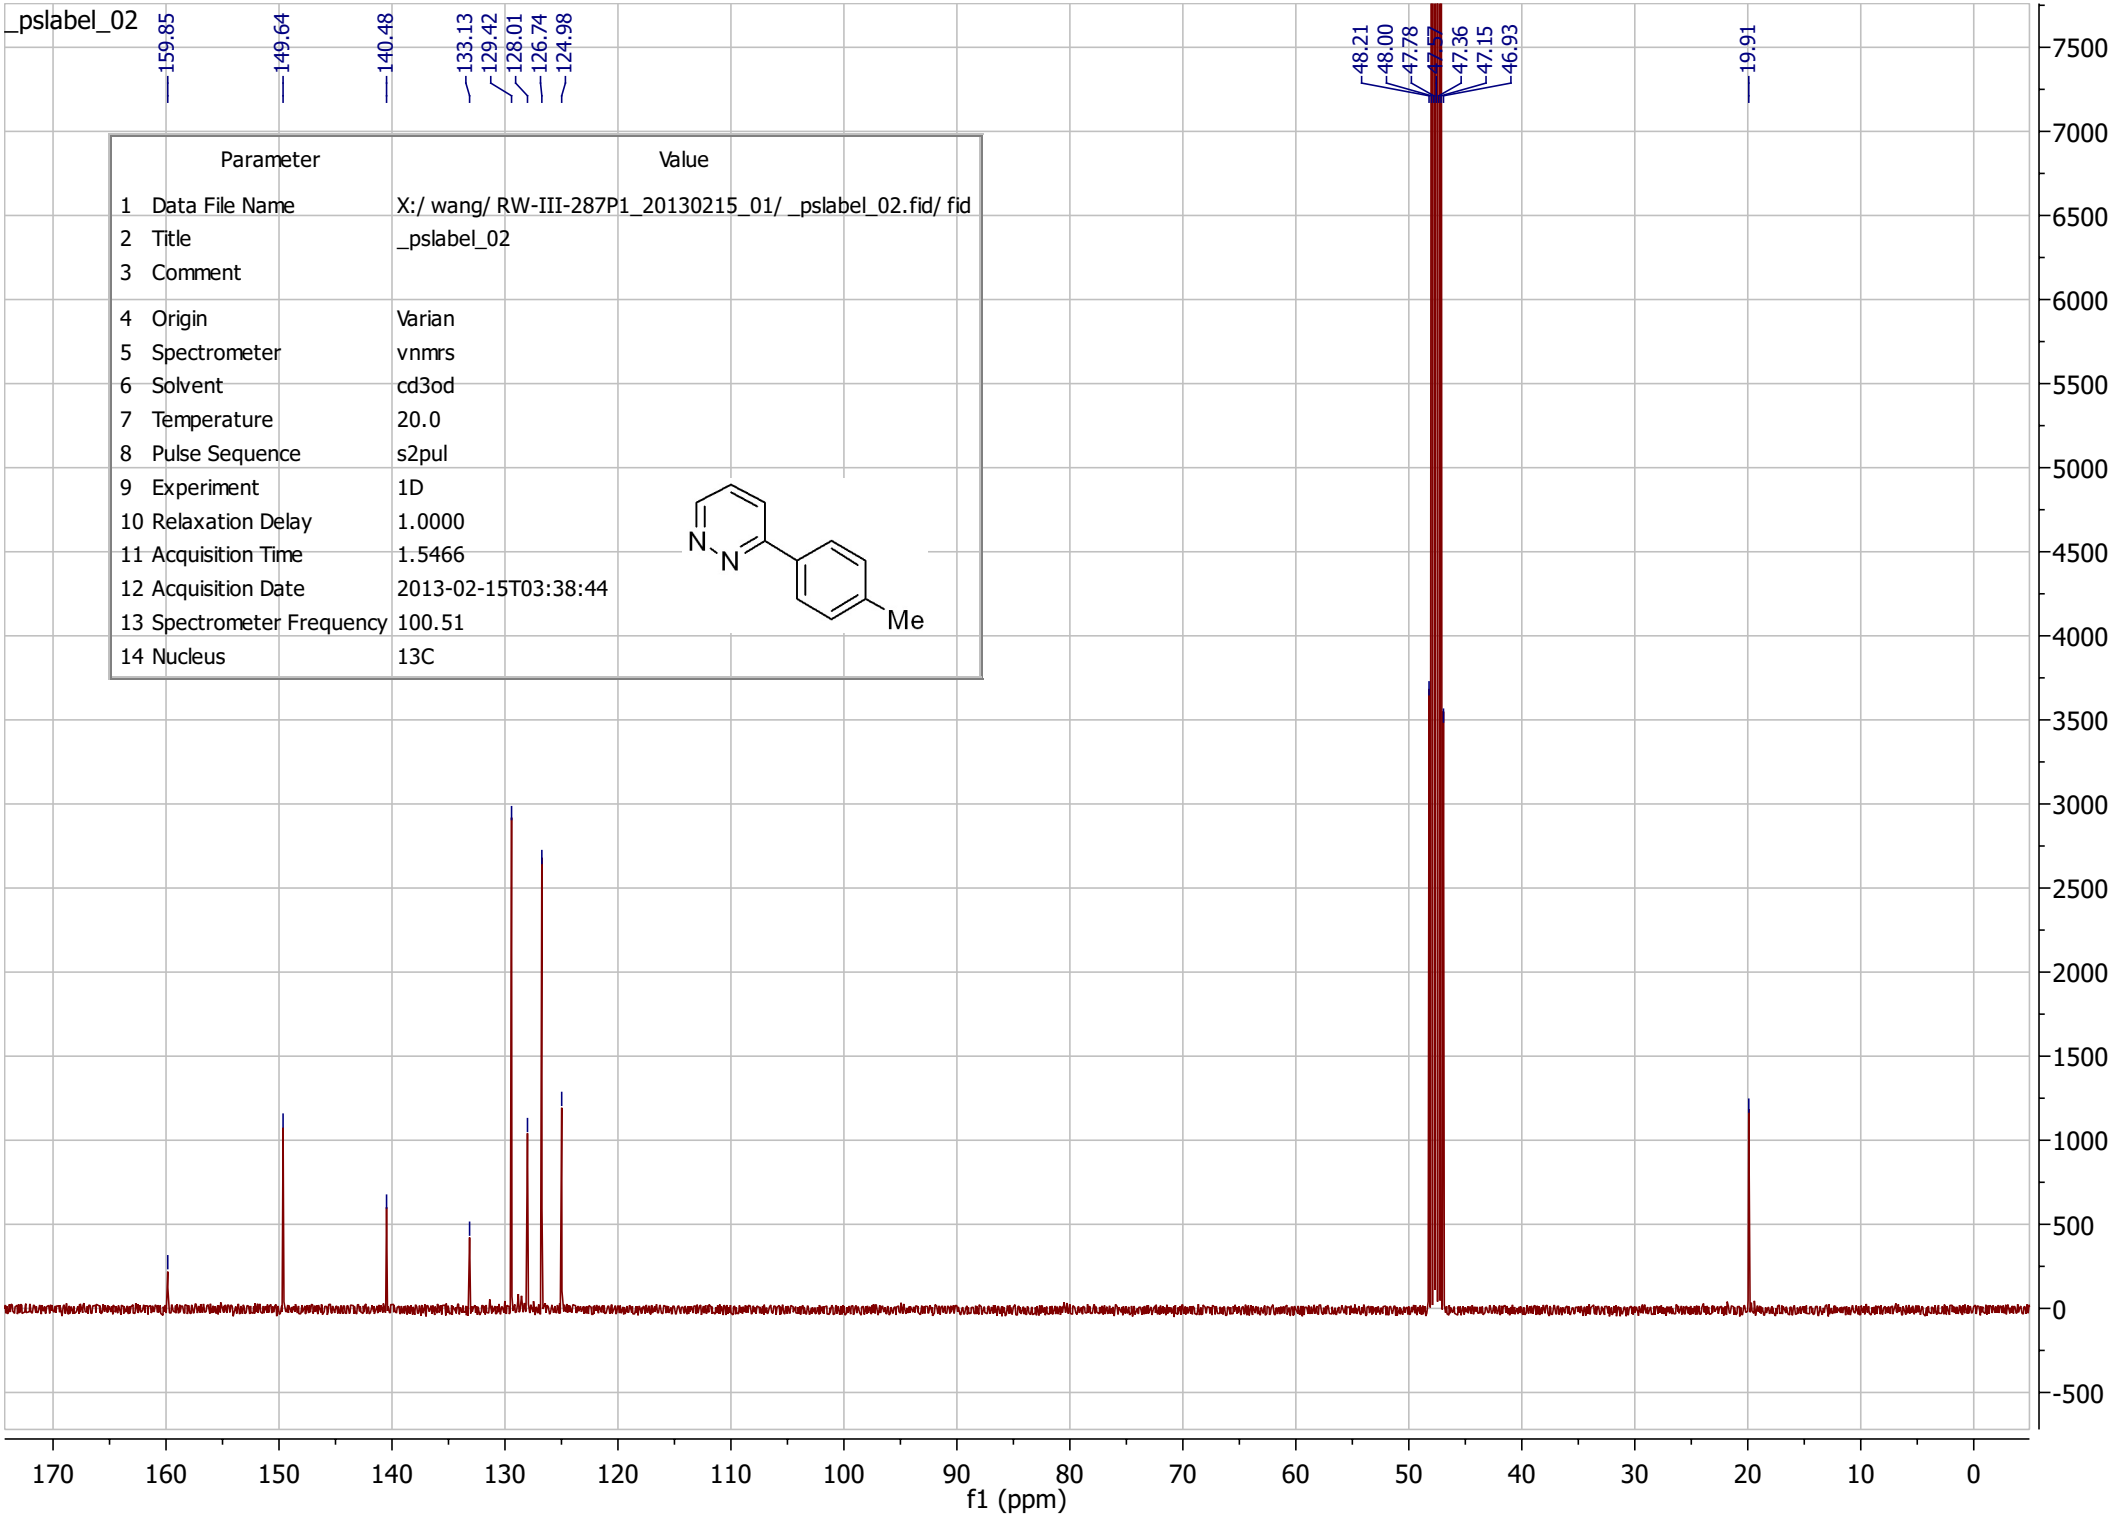

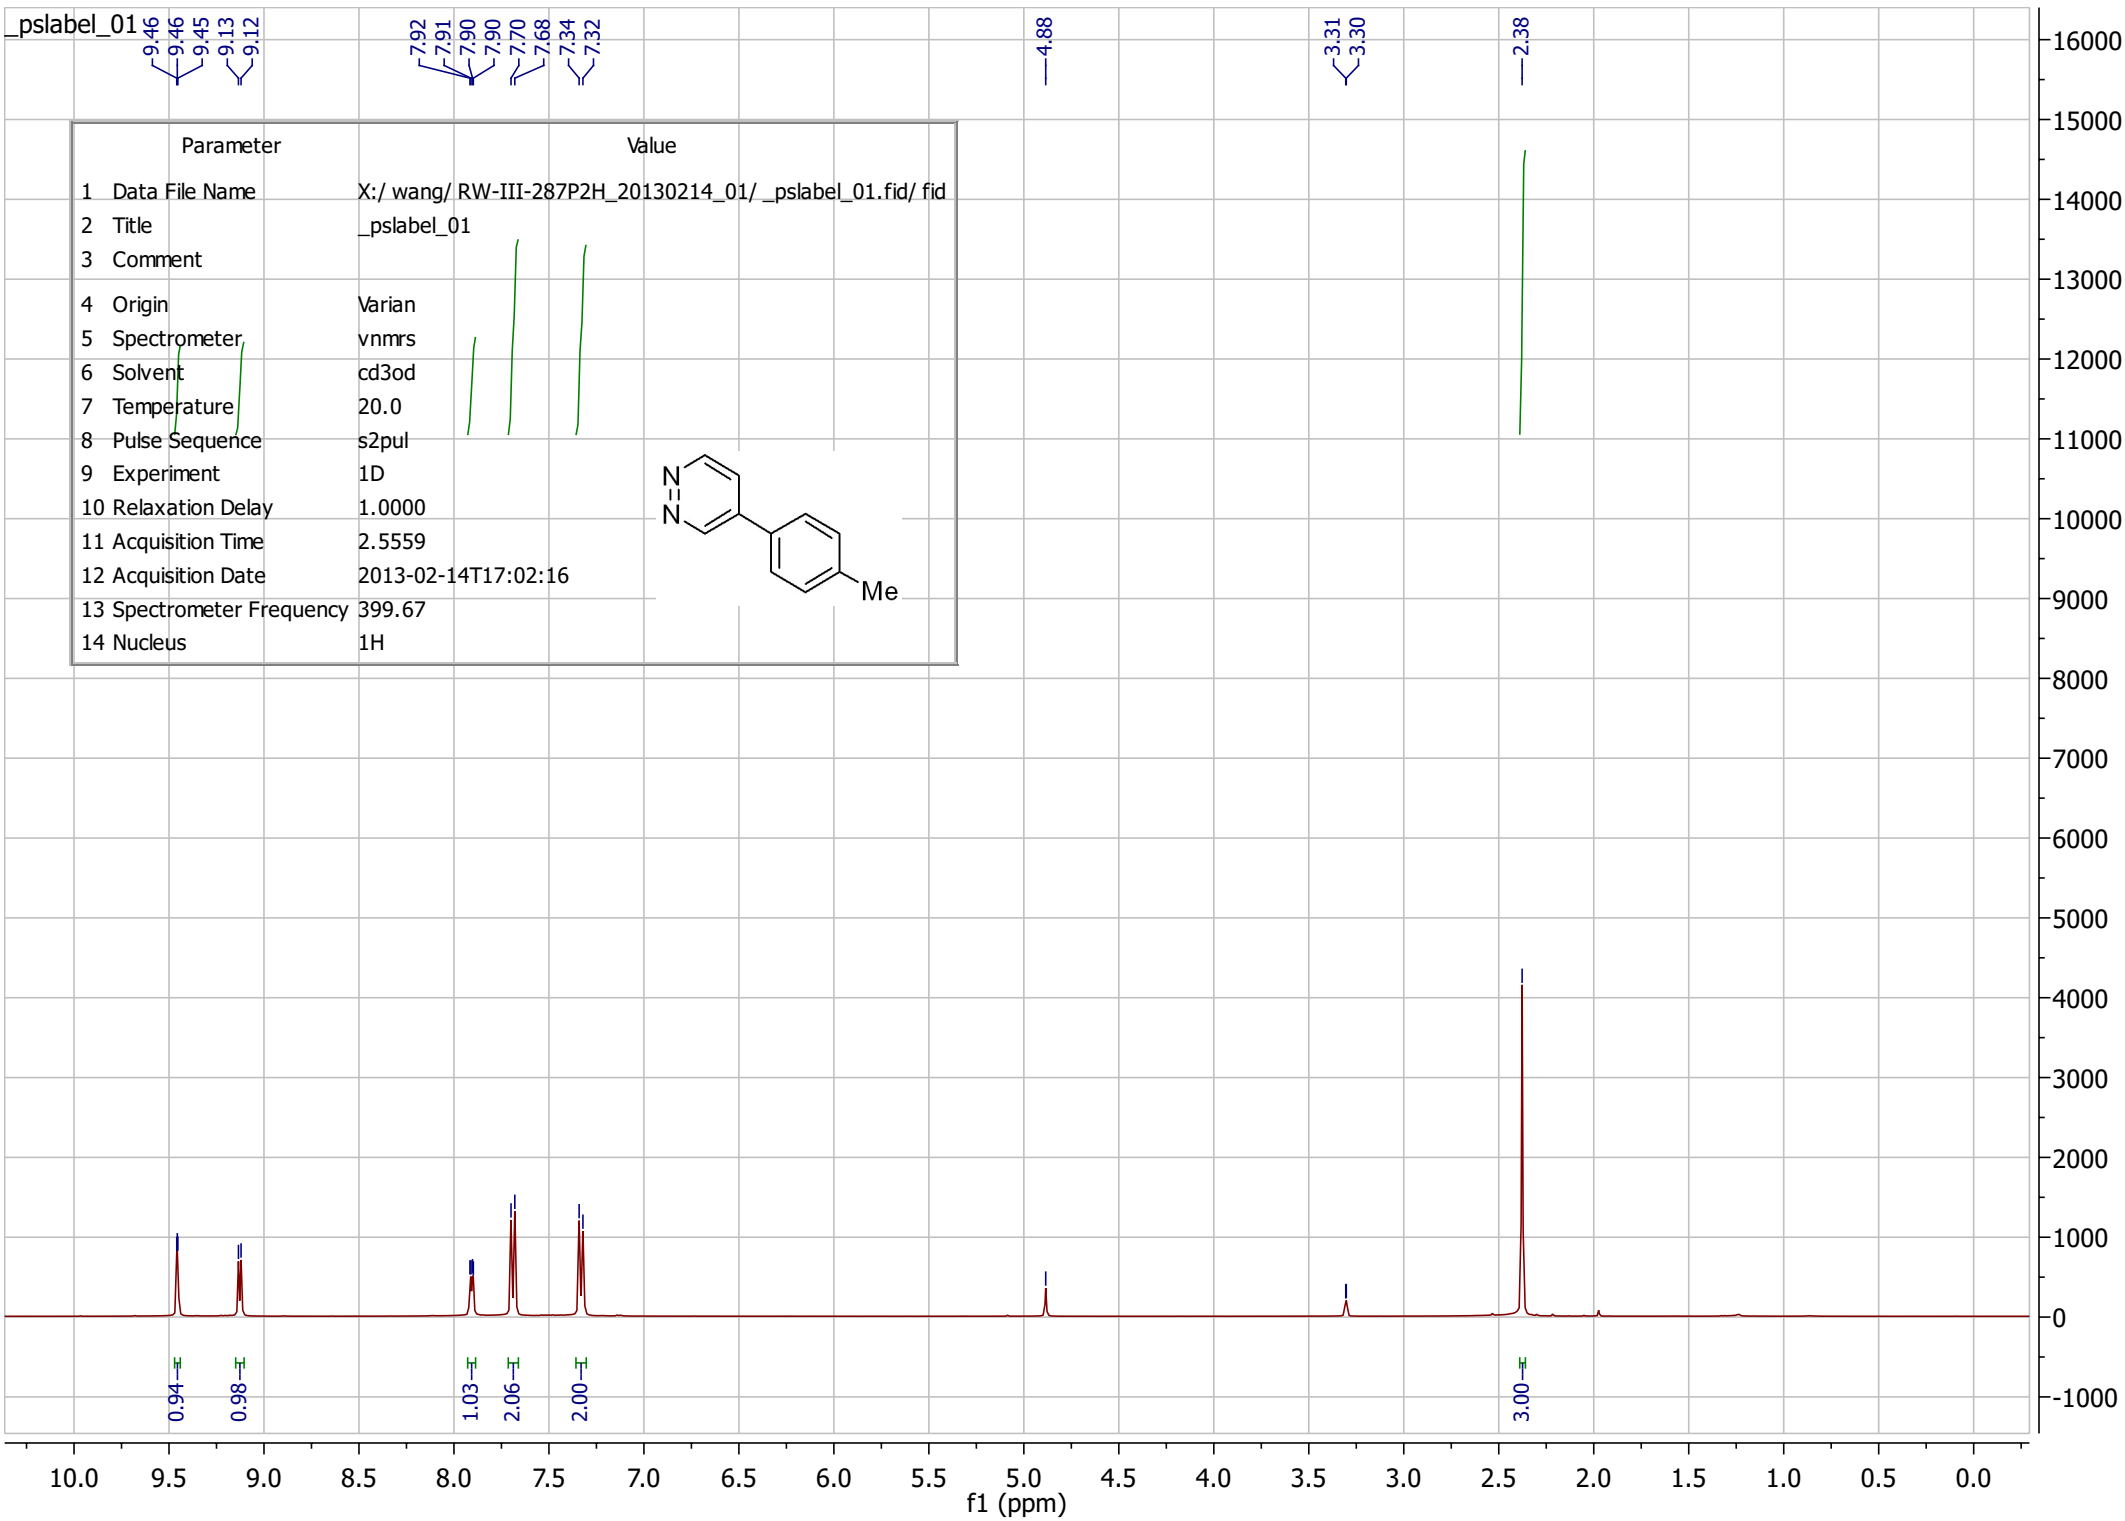

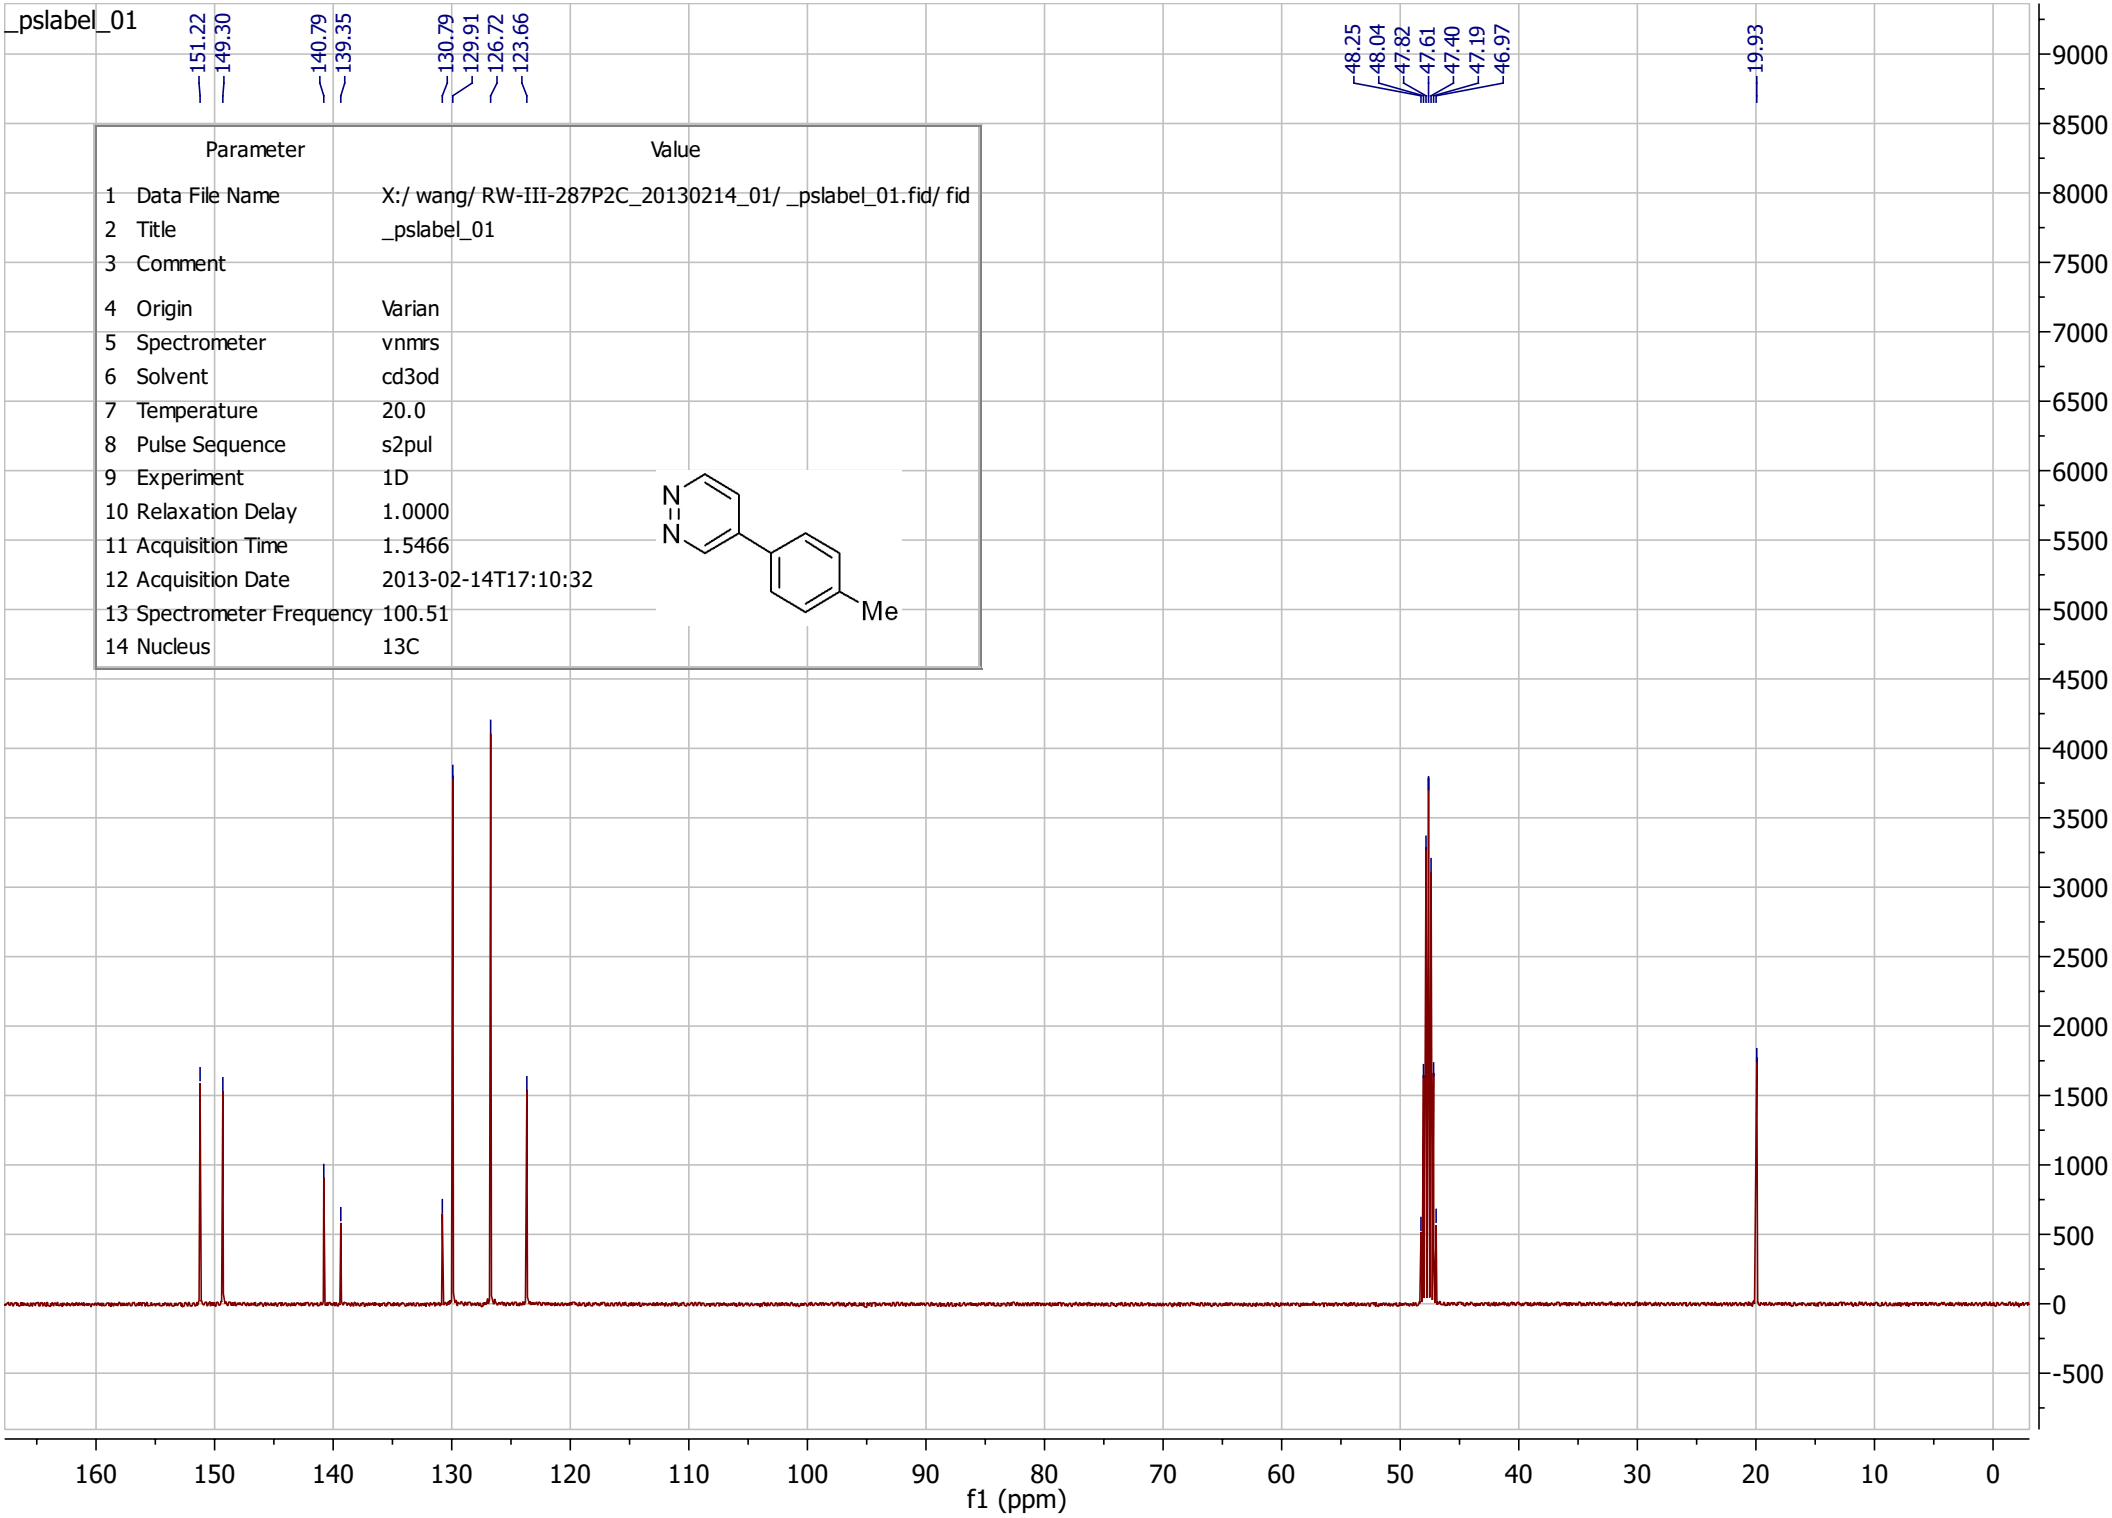

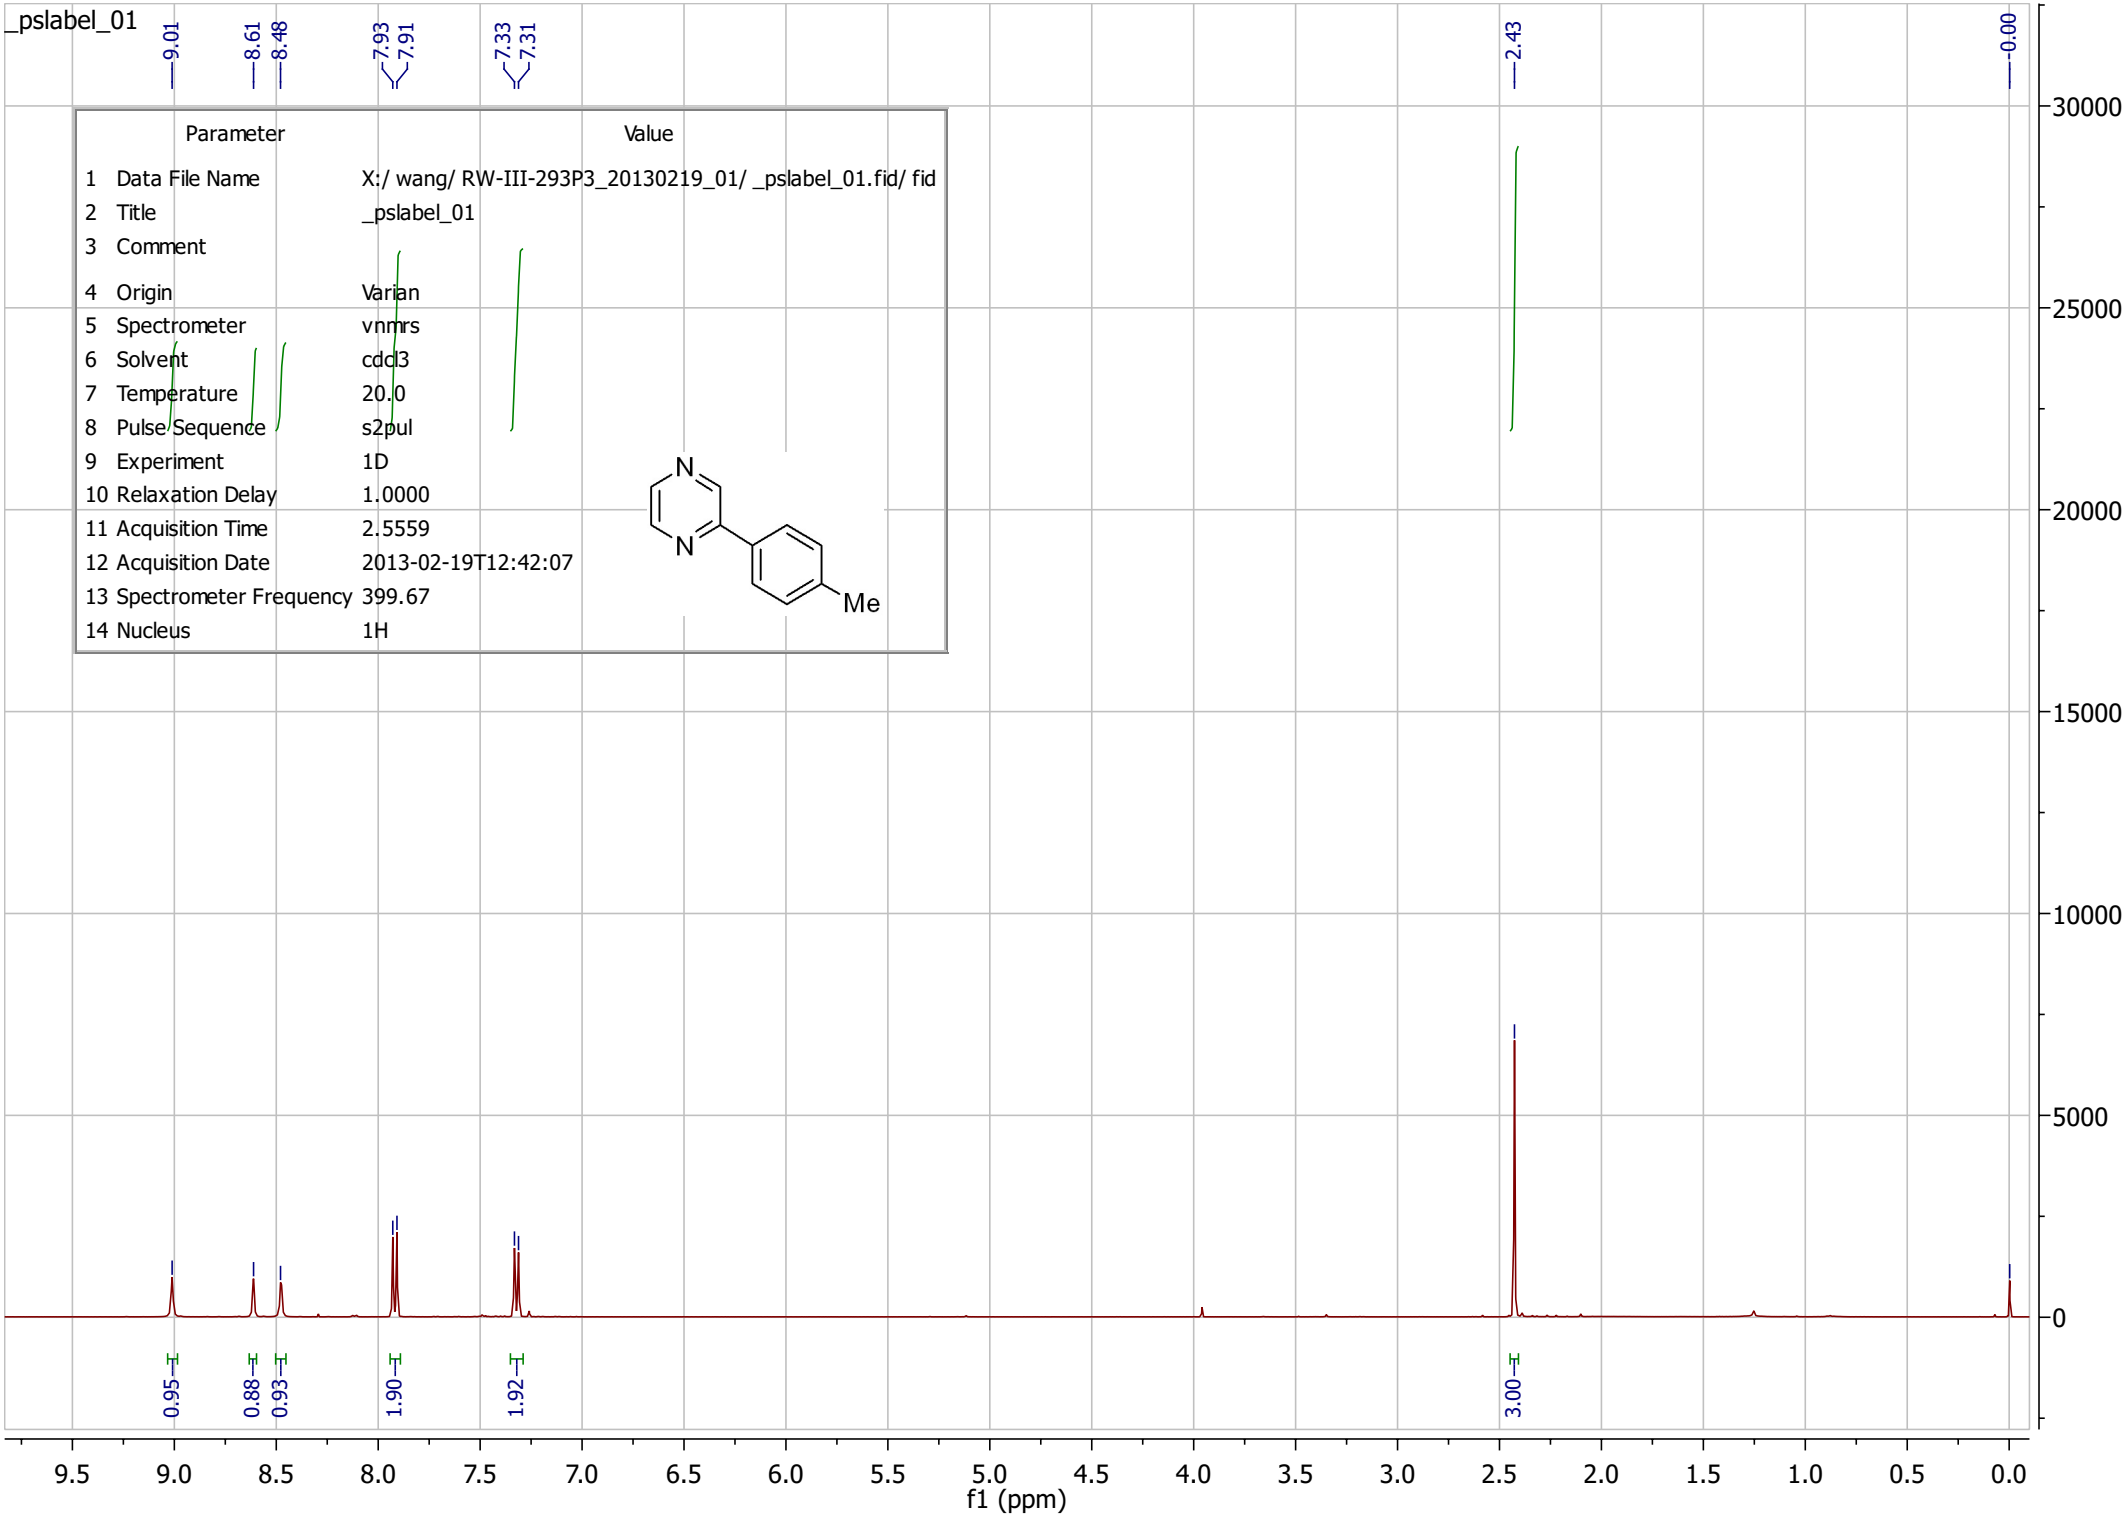

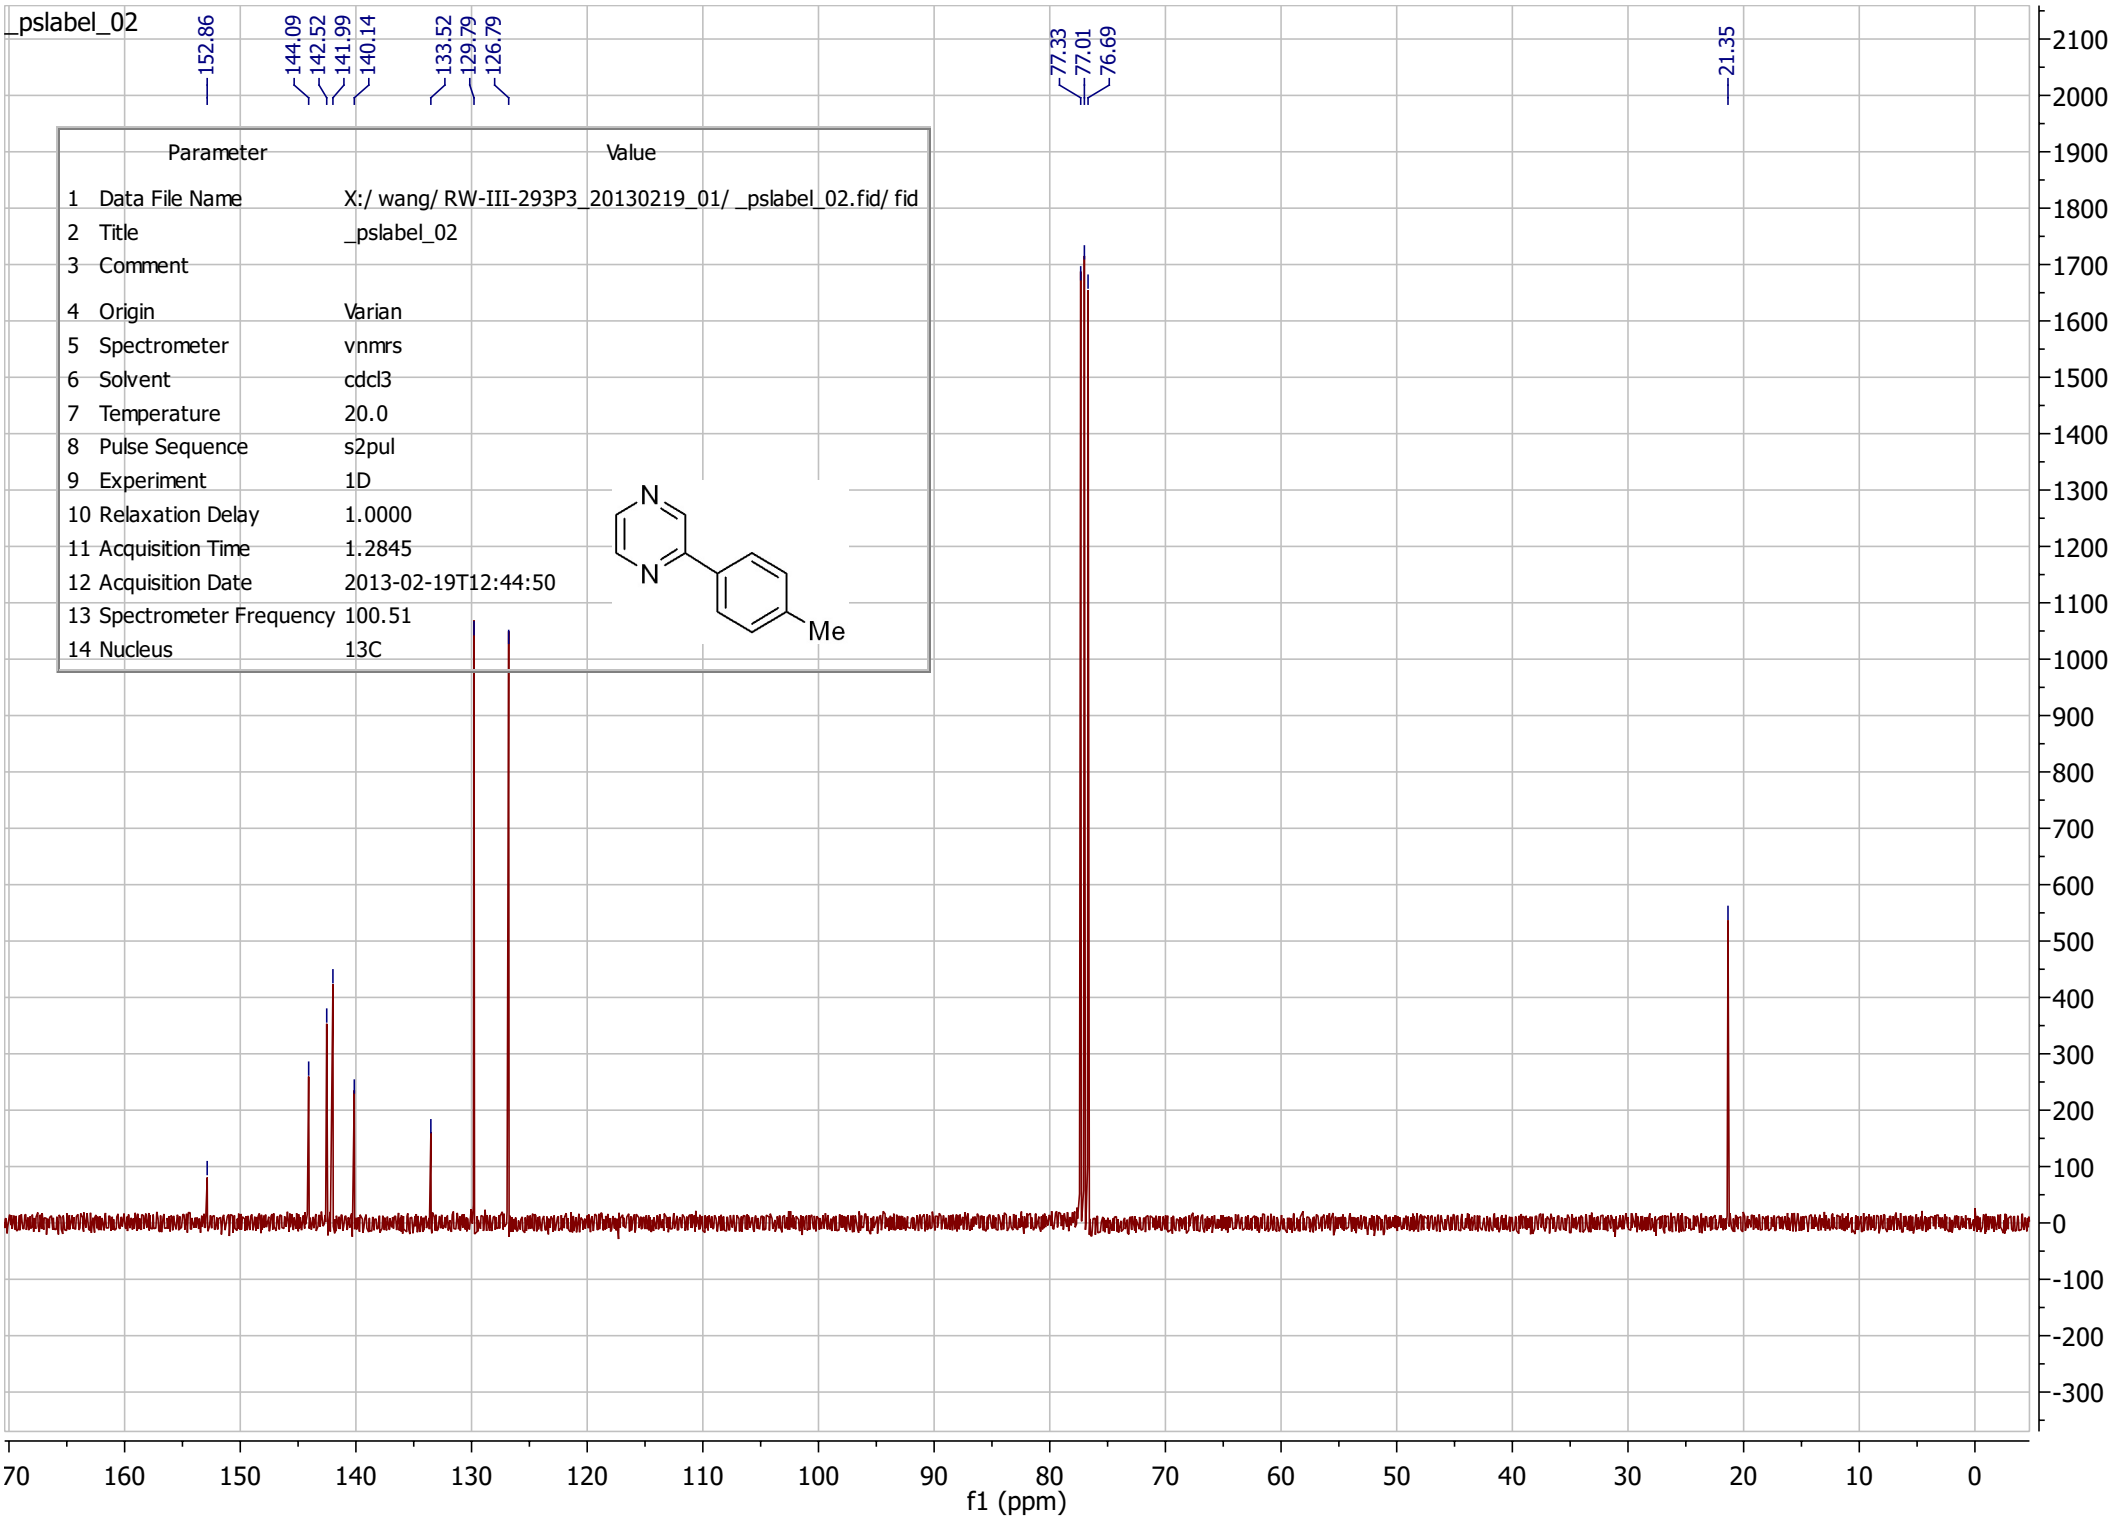

9.50  
8.11  
8.09  
8.02  
8.02  
8.00  
8.00  
7.92  
7.92  
7.91  
7.90  
7.89  
7.88  
7.87  
7.87  
7.86  
7.85  
7.85  
7.84  
7.83  
7.67  
7.65  
7.38  
7.36  
7.26

2.47

| Parameter                 | Value                                                   |
|---------------------------|---------------------------------------------------------|
| 1 Data File Name          | W:/ wang/ RW-III-260H_20130202_01/ _pslabel_01.fid/ fid |
| 2 Title                   | _pslabel_01                                             |
| 3 Comment                 |                                                         |
| 4 Origin                  | Varian                                                  |
| 5 Owner                   |                                                         |
| 6 Site                    |                                                         |
| 7 Spectrometer            | vnmrs                                                   |
| 8 Author                  |                                                         |
| 9 Solvent                 | cdcl3                                                   |
| 10 Temperature            | 20.0                                                    |
| 11 Pulse Sequence         | s2pul                                                   |
| 12 Experiment             | 1D                                                      |
| 13 Number of Scans        | 33                                                      |
| 14 Receiver Gain          | 30                                                      |
| 15 Relaxation Delay       | 1.0000                                                  |
| 16 Pulse Width            | 0.0000                                                  |
| 17 Acquisition Time       | 2.5559                                                  |
| 18 Acquisition Date       | 2013-02-02T11:48:03                                     |
| 19 Modification Date      | 2013-02-02T11:50:13                                     |
| 20 Spectrometer Frequency | 399.67                                                  |
| 21 Spectral Width         | 6410.3                                                  |
| 22 Lowest Frequency       | -807.1                                                  |
| 23 Nucleus                | 1H                                                      |
| 24 Acquired Size          | 16384                                                   |
| 25 Spectral Size          | 32768                                                   |

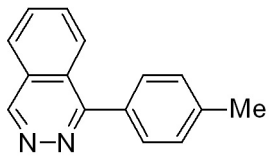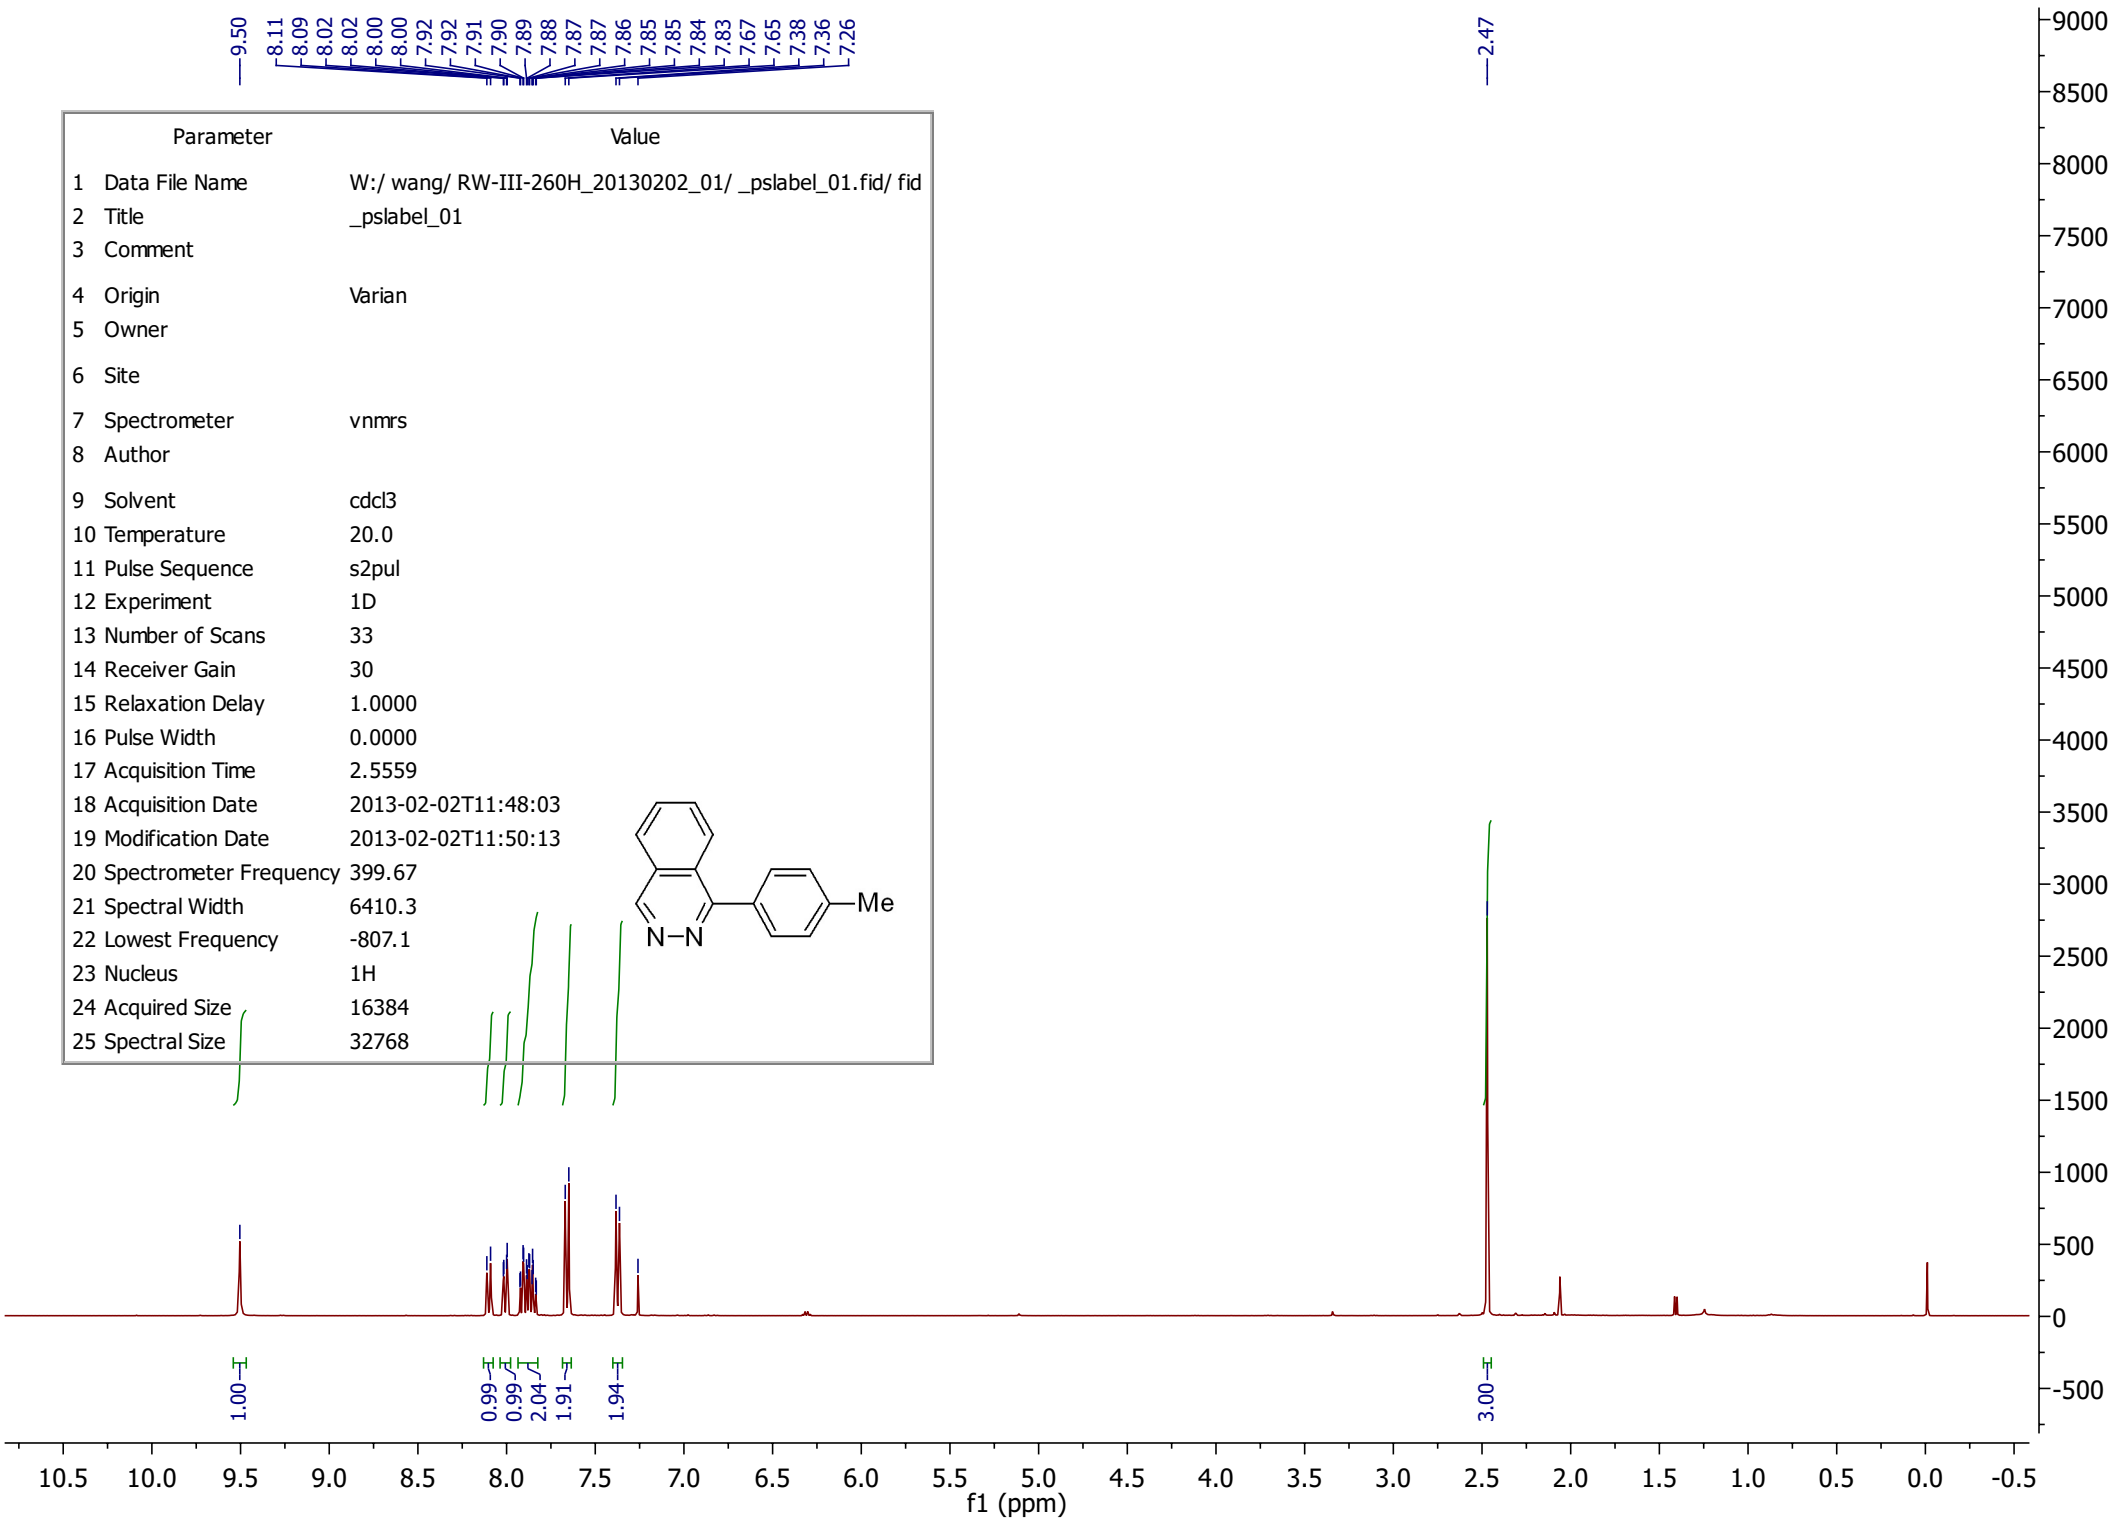



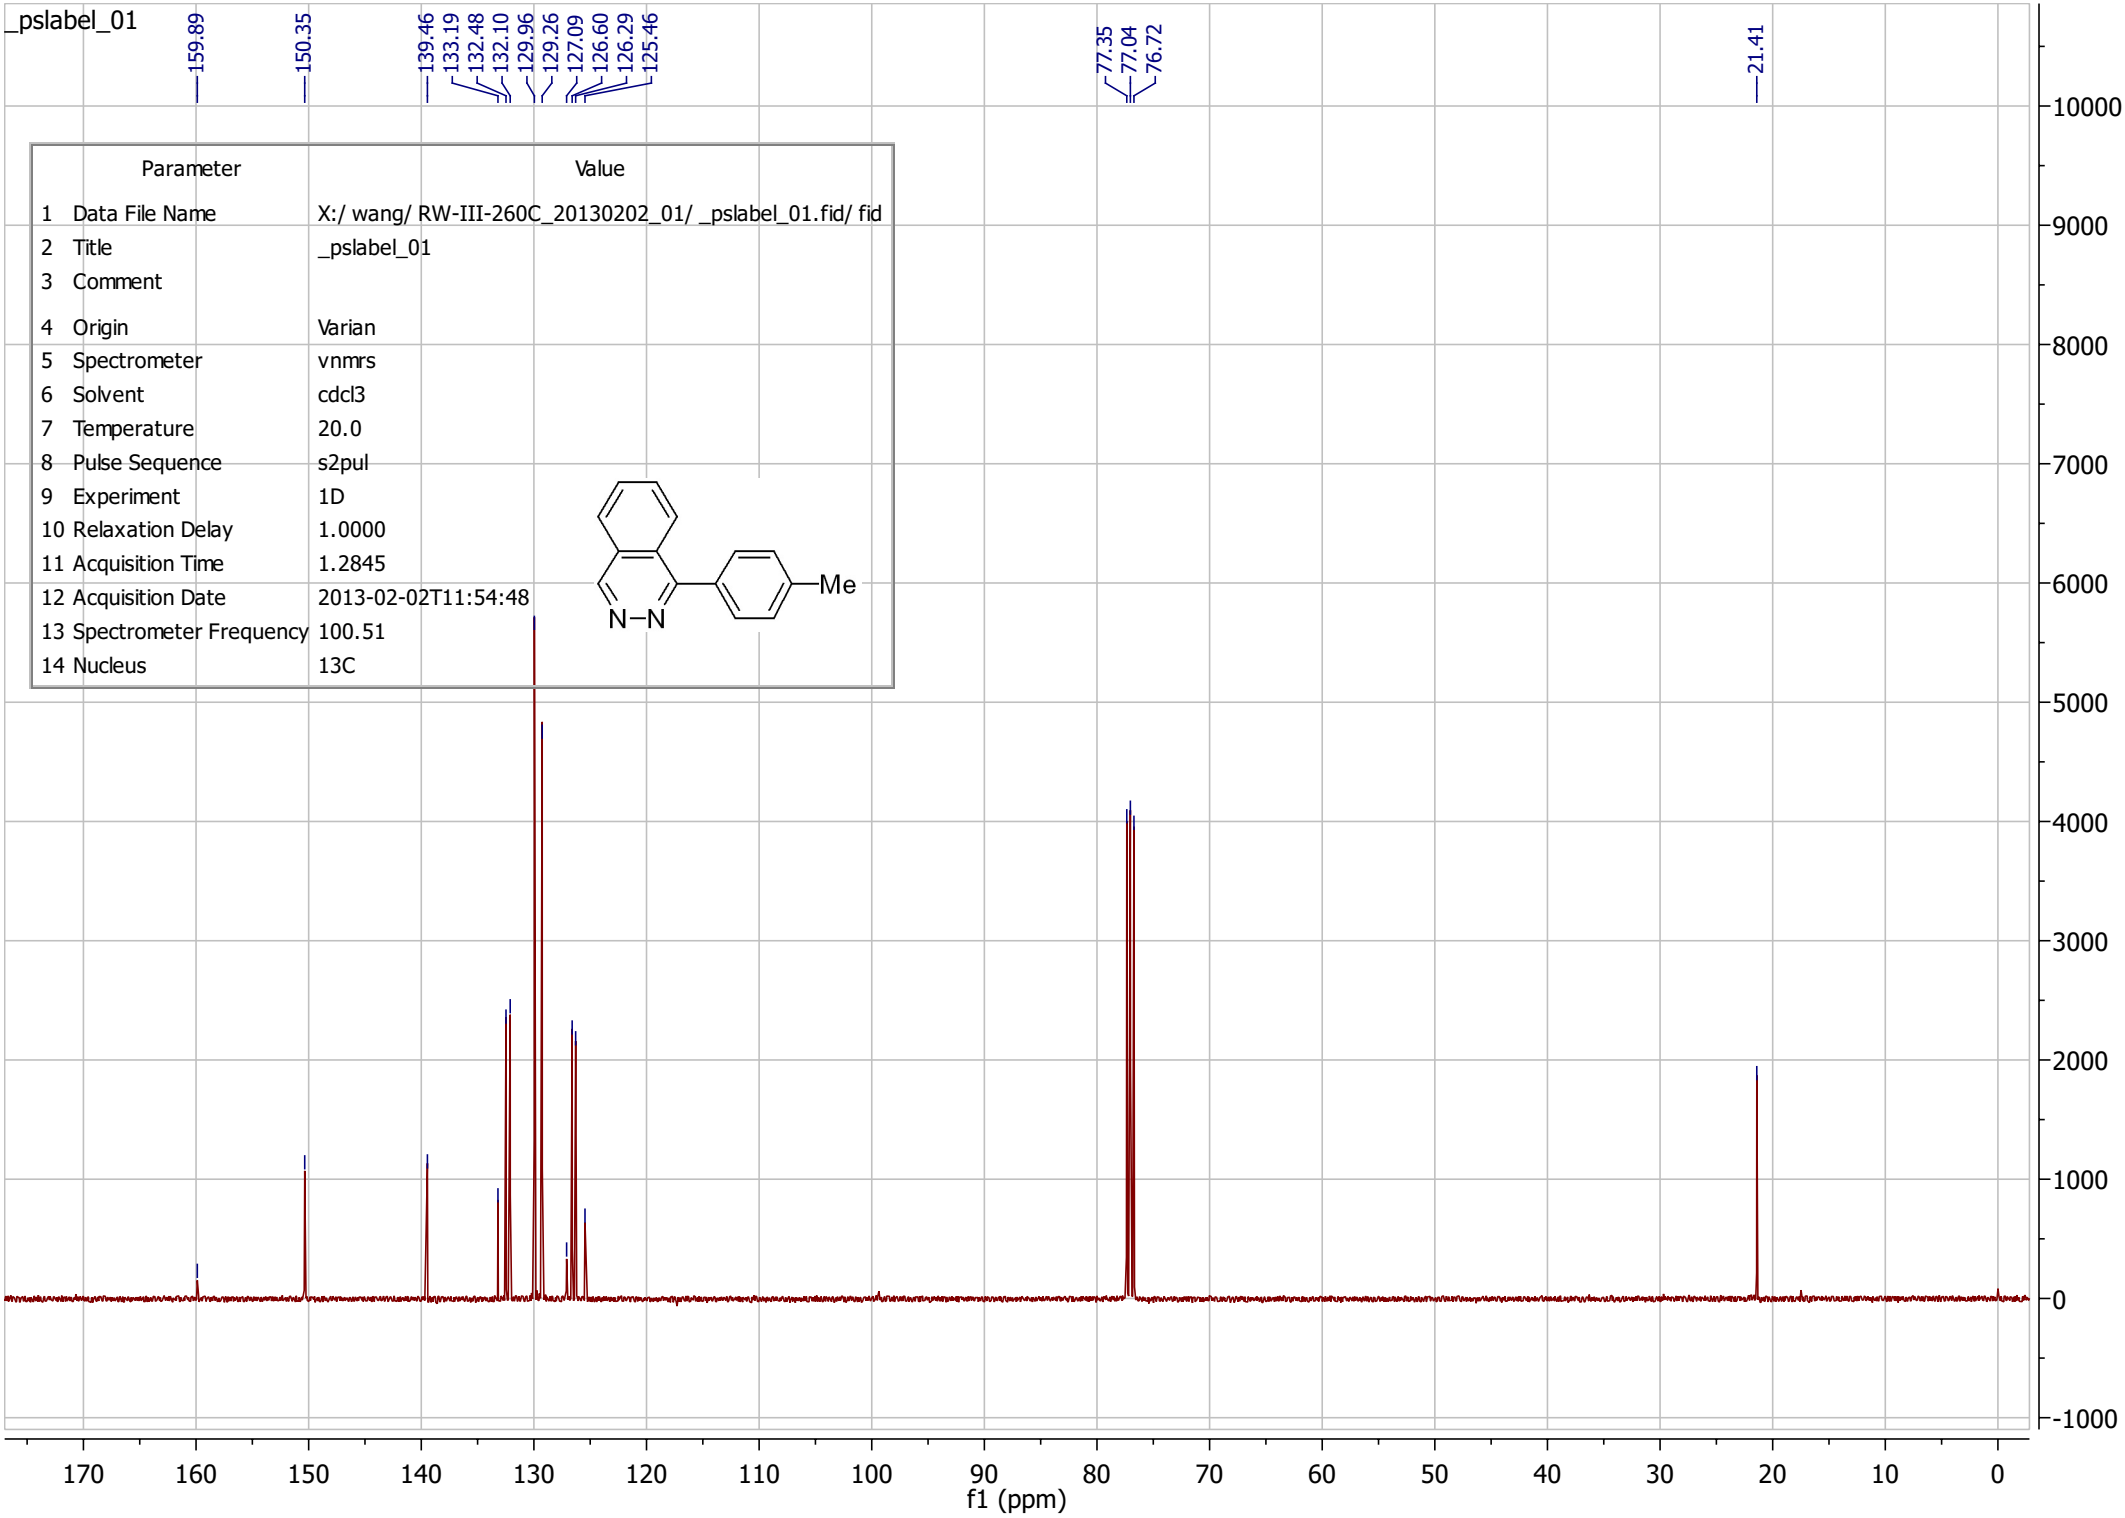

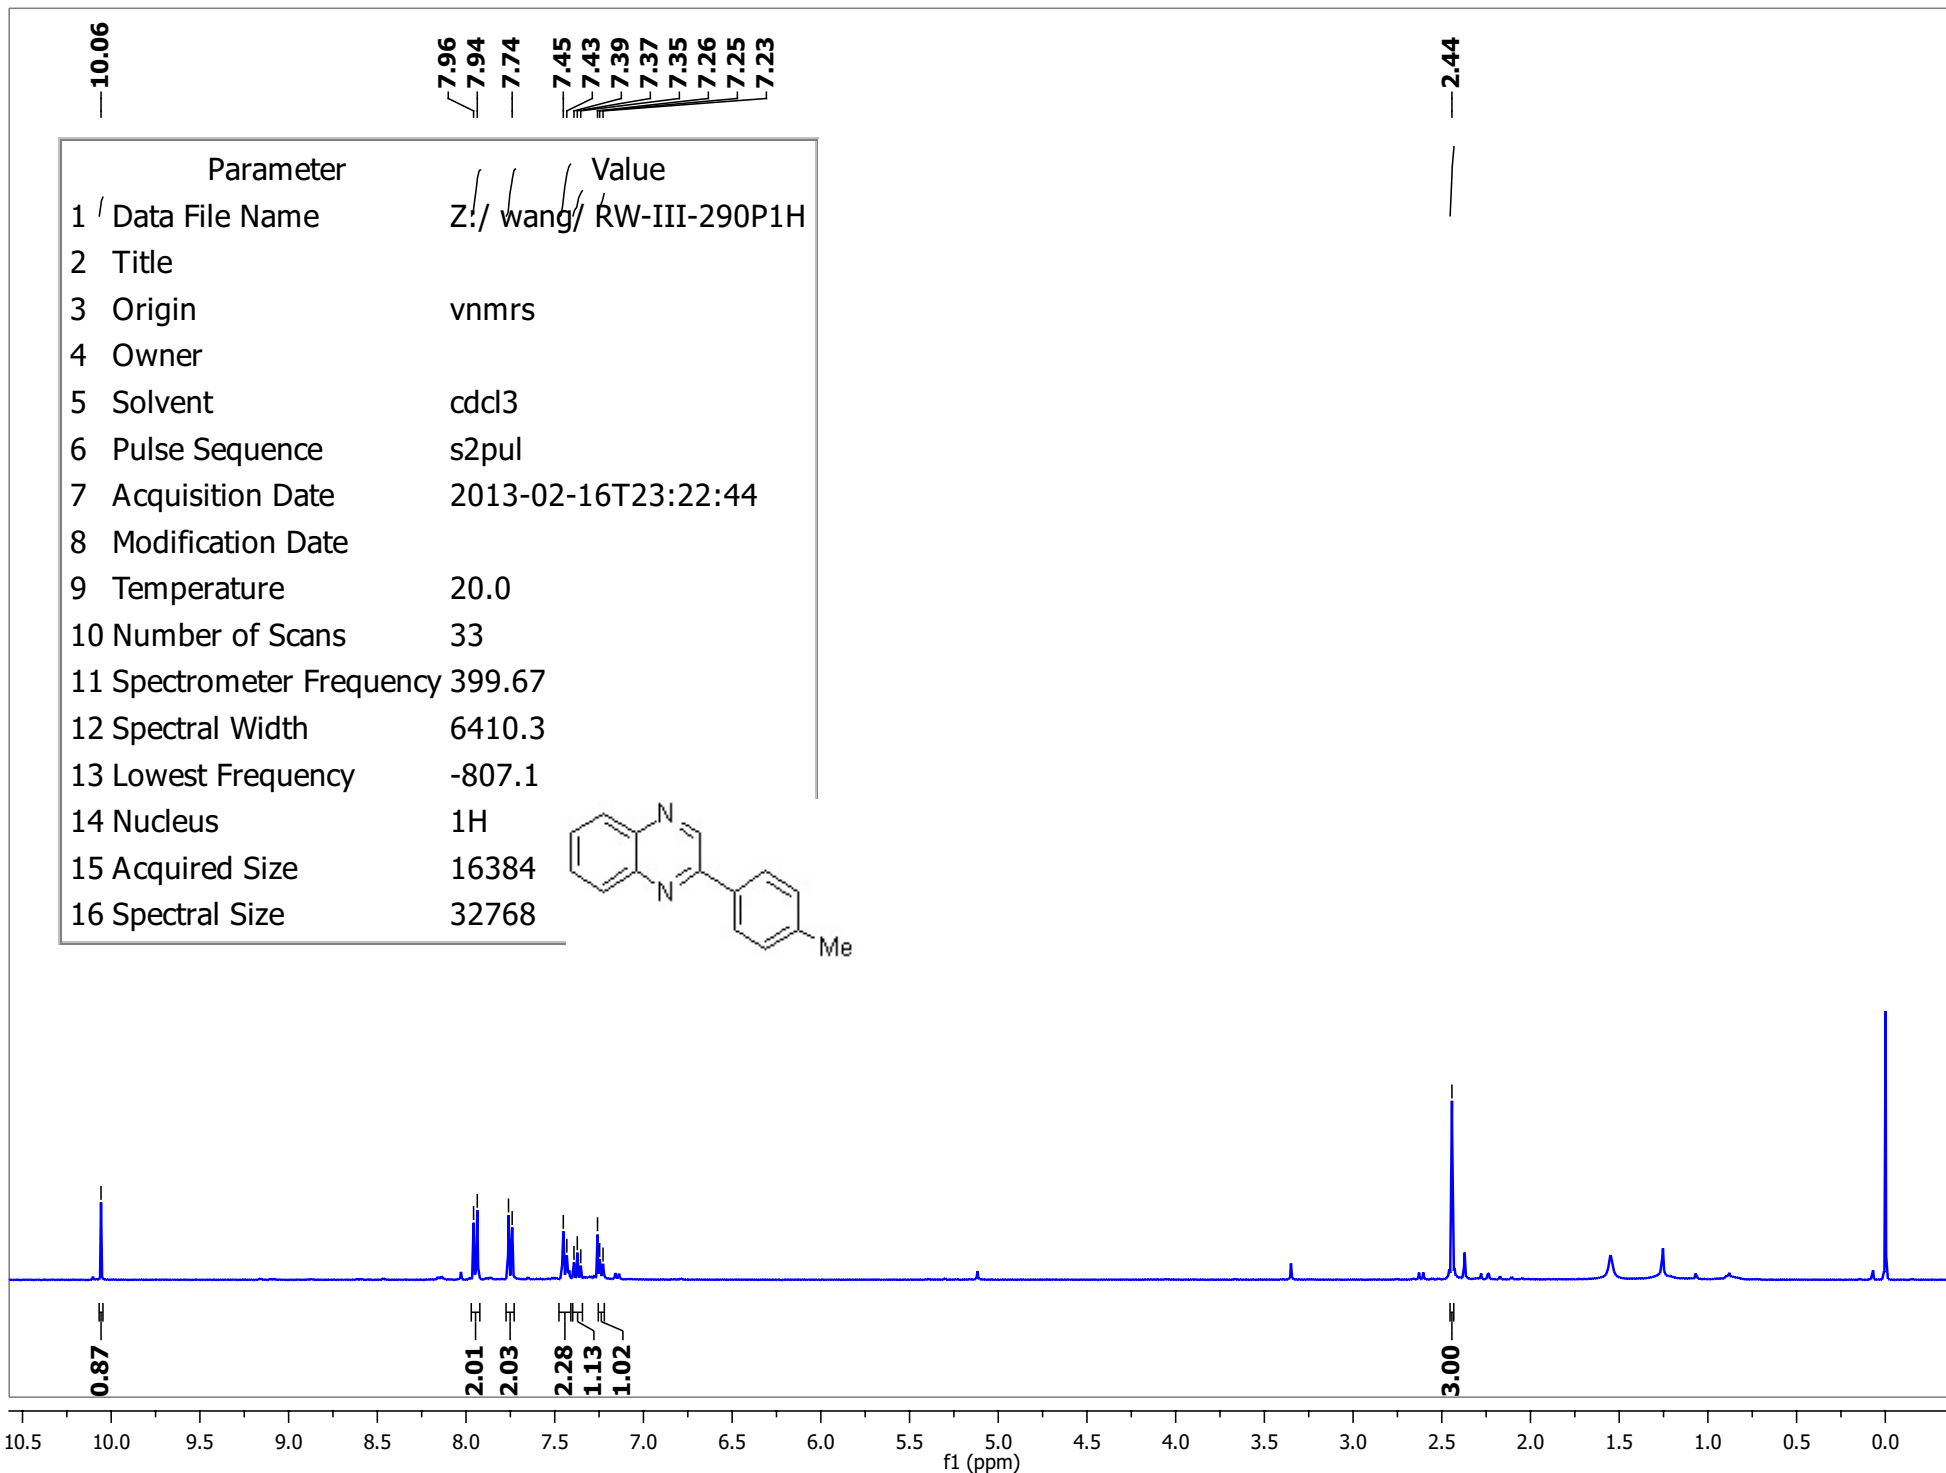

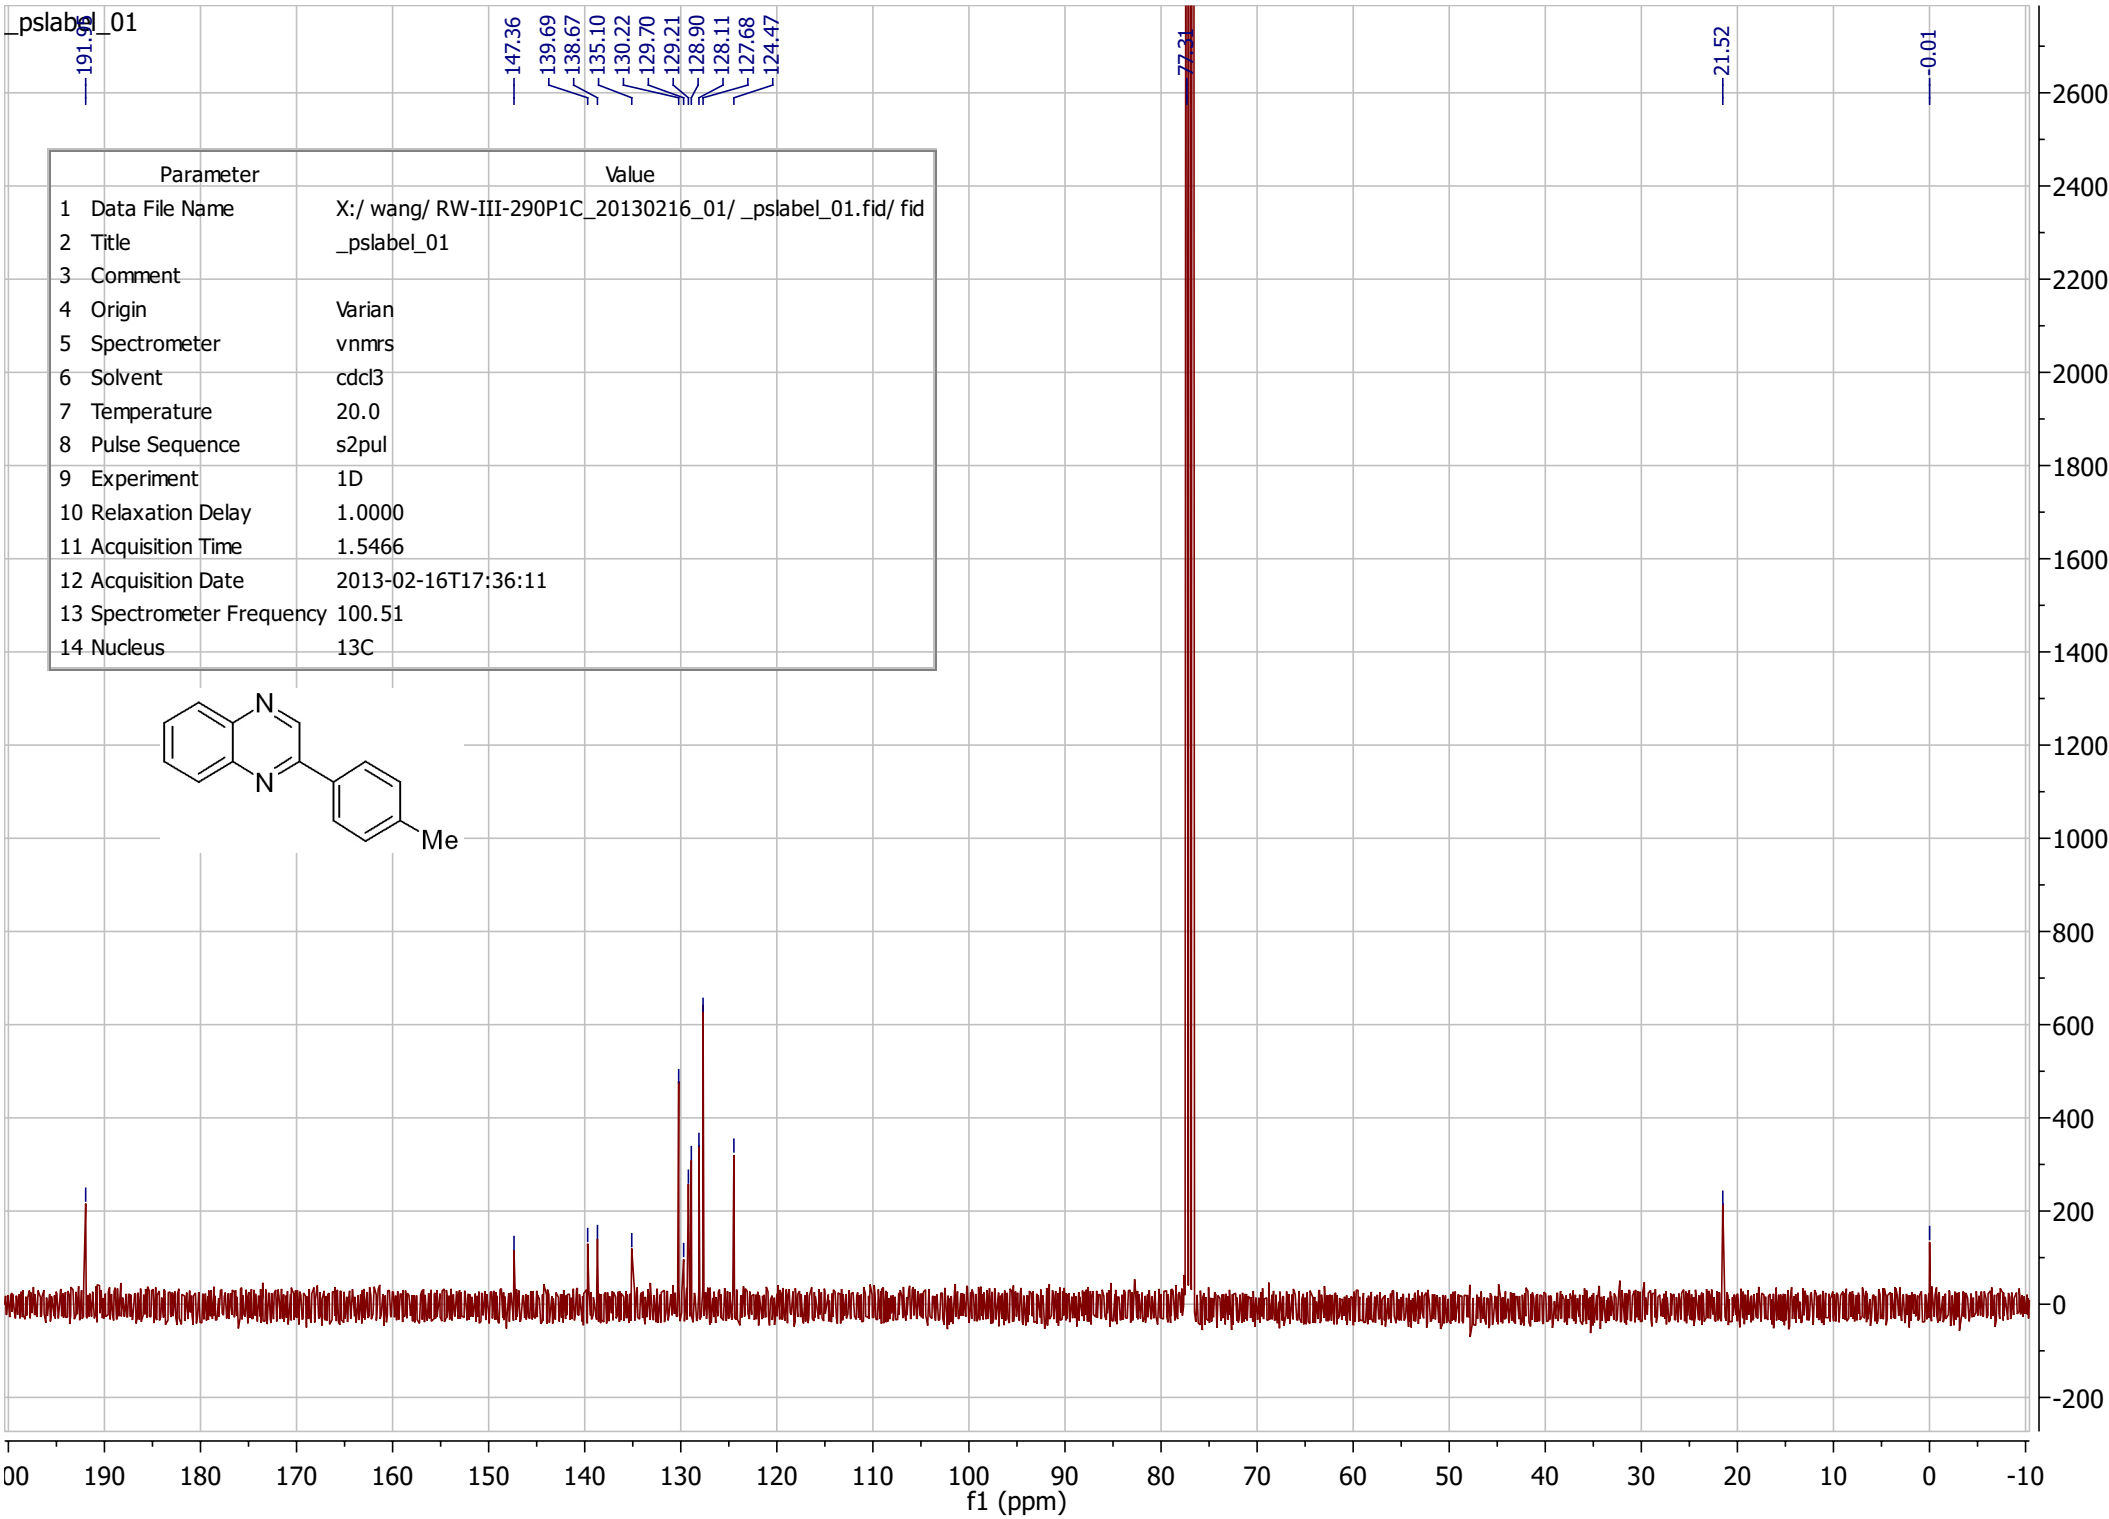

9.31

8.15

8.13

8.13

8.12

8.10

7.75

7.39

7.37

2.46

| Parameter                 | Value                  |
|---------------------------|------------------------|
| 1 Data File Name          | Z:/wang/ RW-III-290P2H |
| 2 Title                   |                        |
| 3 Origin                  | vnmrs                  |
| 4 Owner                   |                        |
| 5 Solvent                 | cdcl3                  |
| 6 Pulse Sequence          | s2pul                  |
| 7 Acquisition Date        | 2013-02-16T23:27:30    |
| 8 Modification Date       |                        |
| 9 Temperature             | 20.0                   |
| 10 Number of Scans        | 33                     |
| 11 Spectrometer Frequency | 399.67                 |
| 12 Spectral Width         | 6410.3                 |
| 13 Lowest Frequency       | -807.1                 |
| 14 Nucleus                | 1H                     |
| 15 Acquired Size          | 16384                  |
| 16 Spectral Size          | 32768                  |

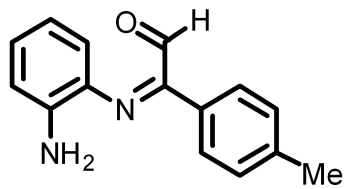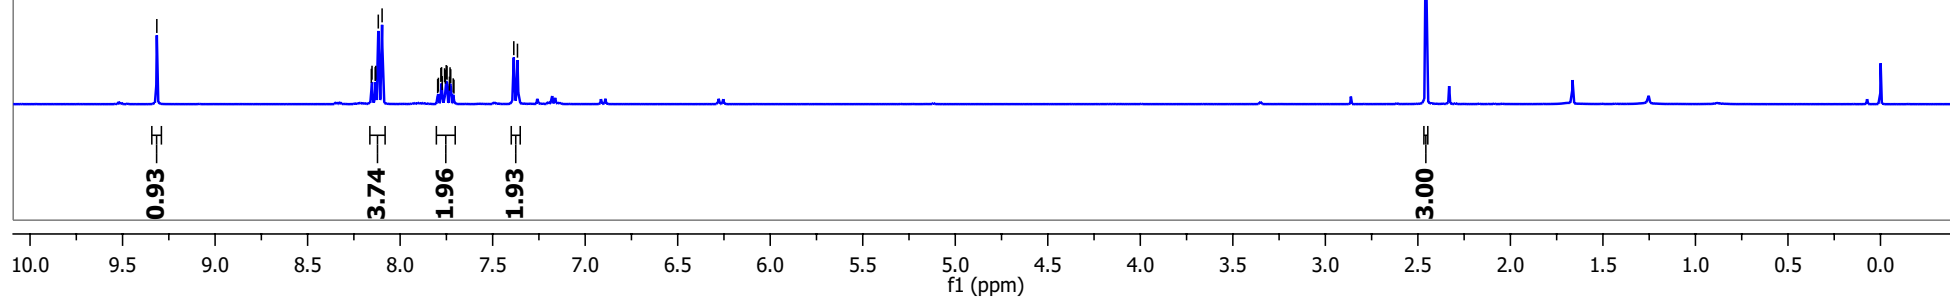

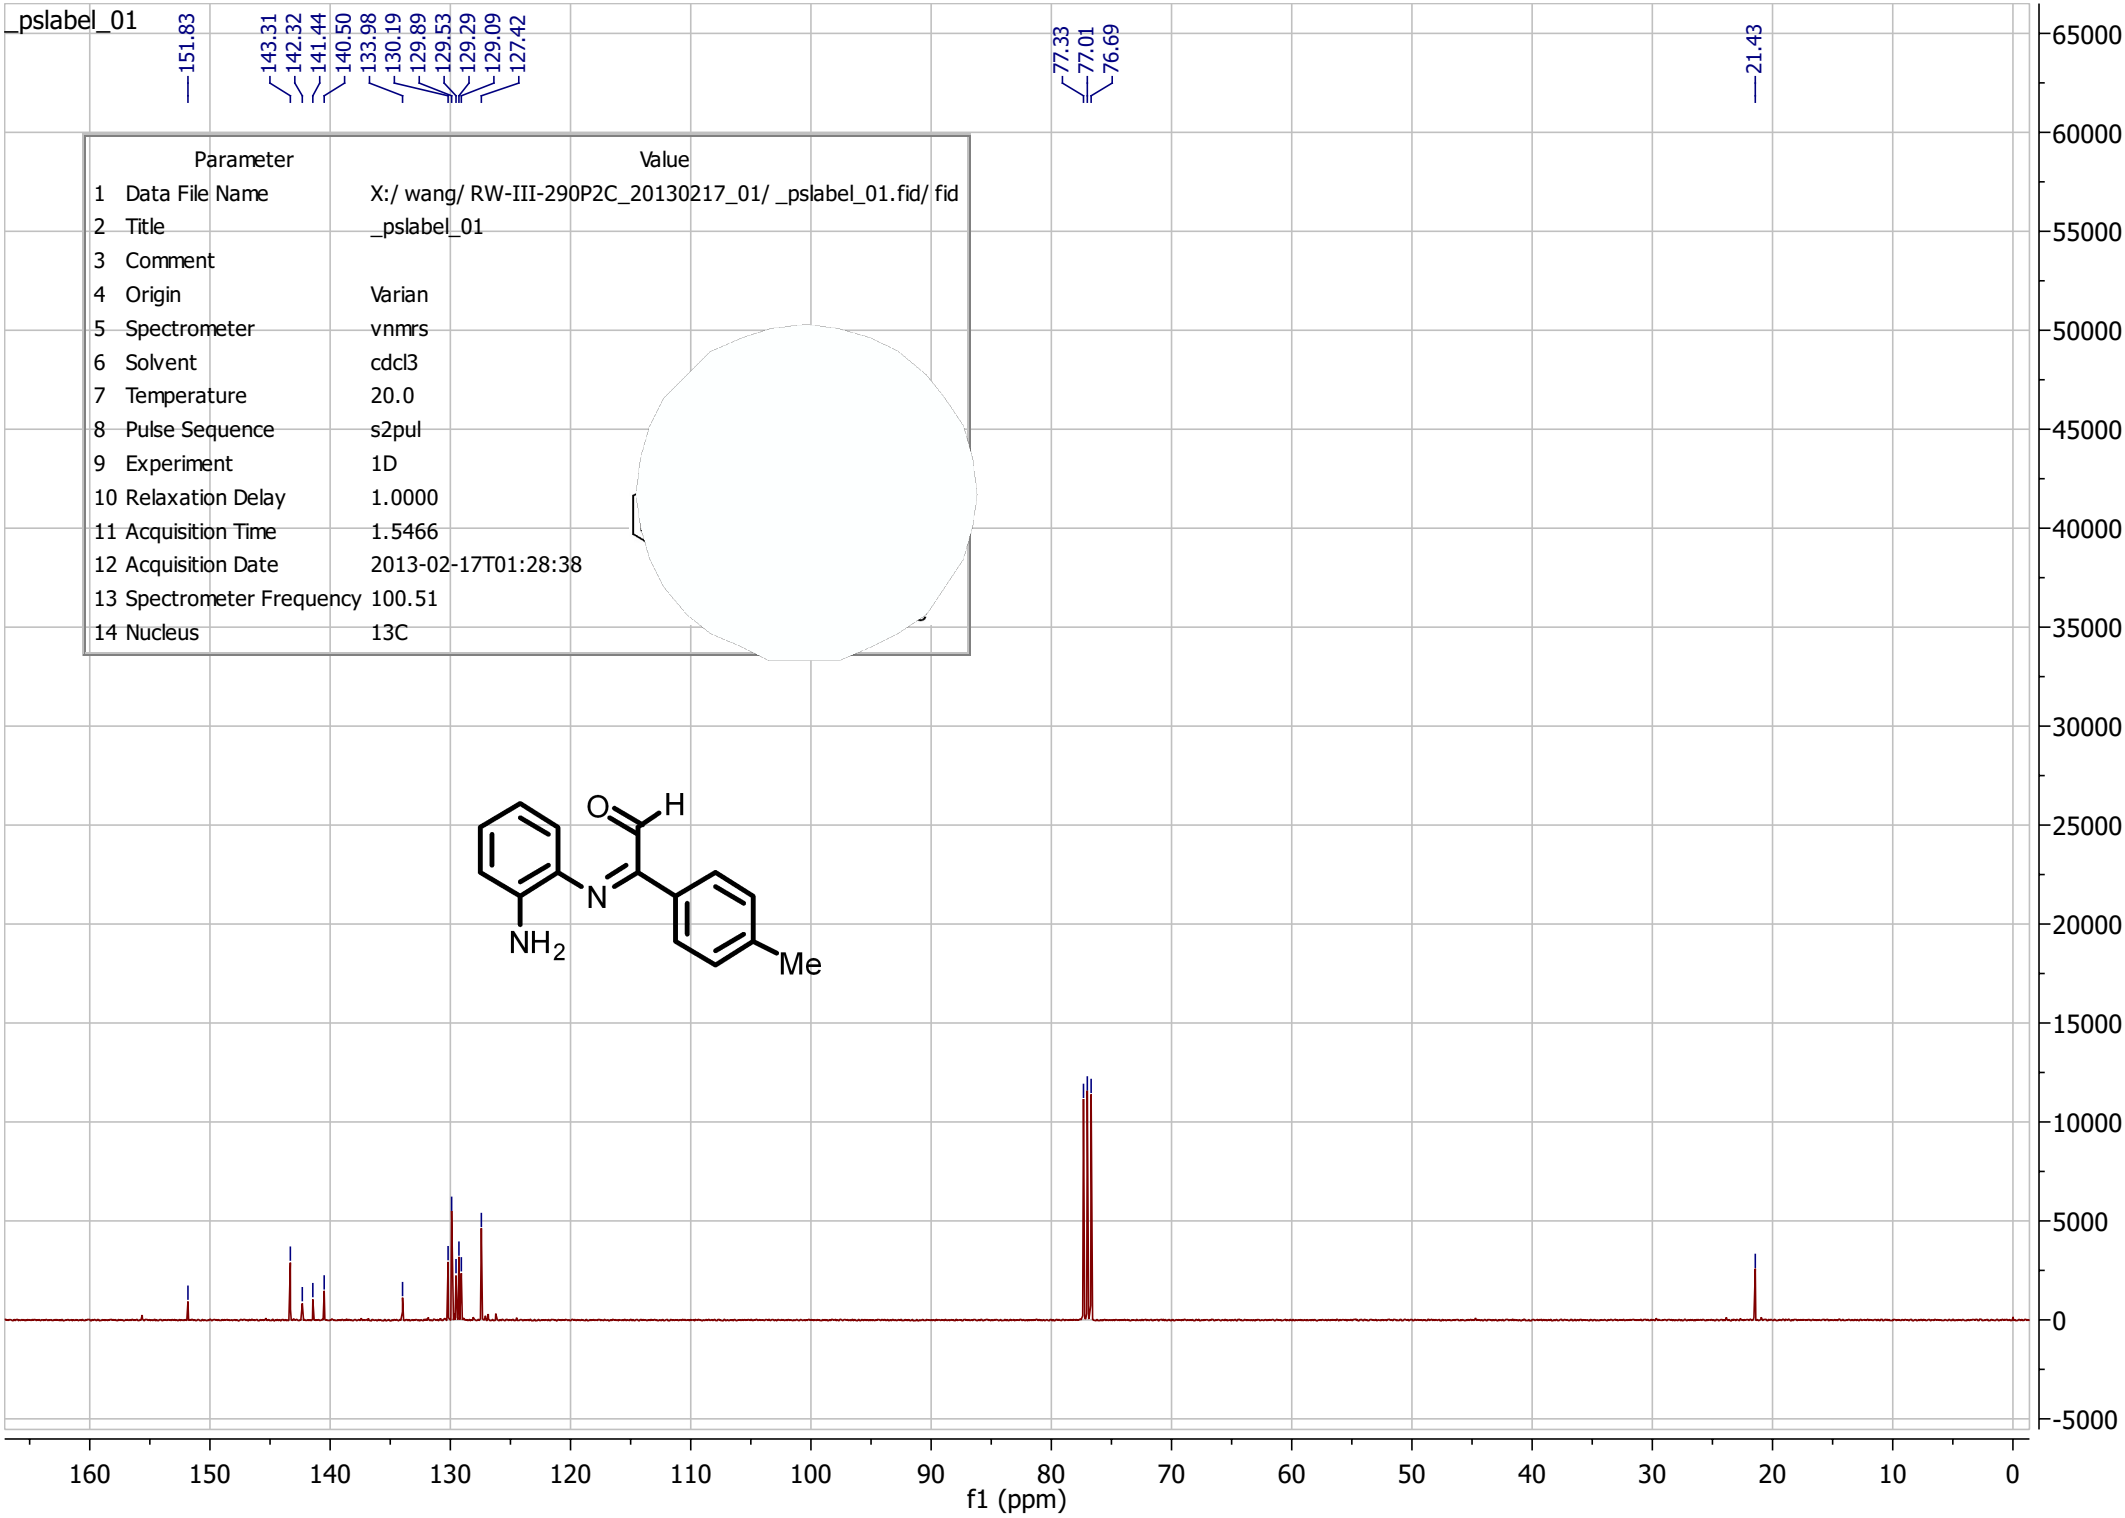

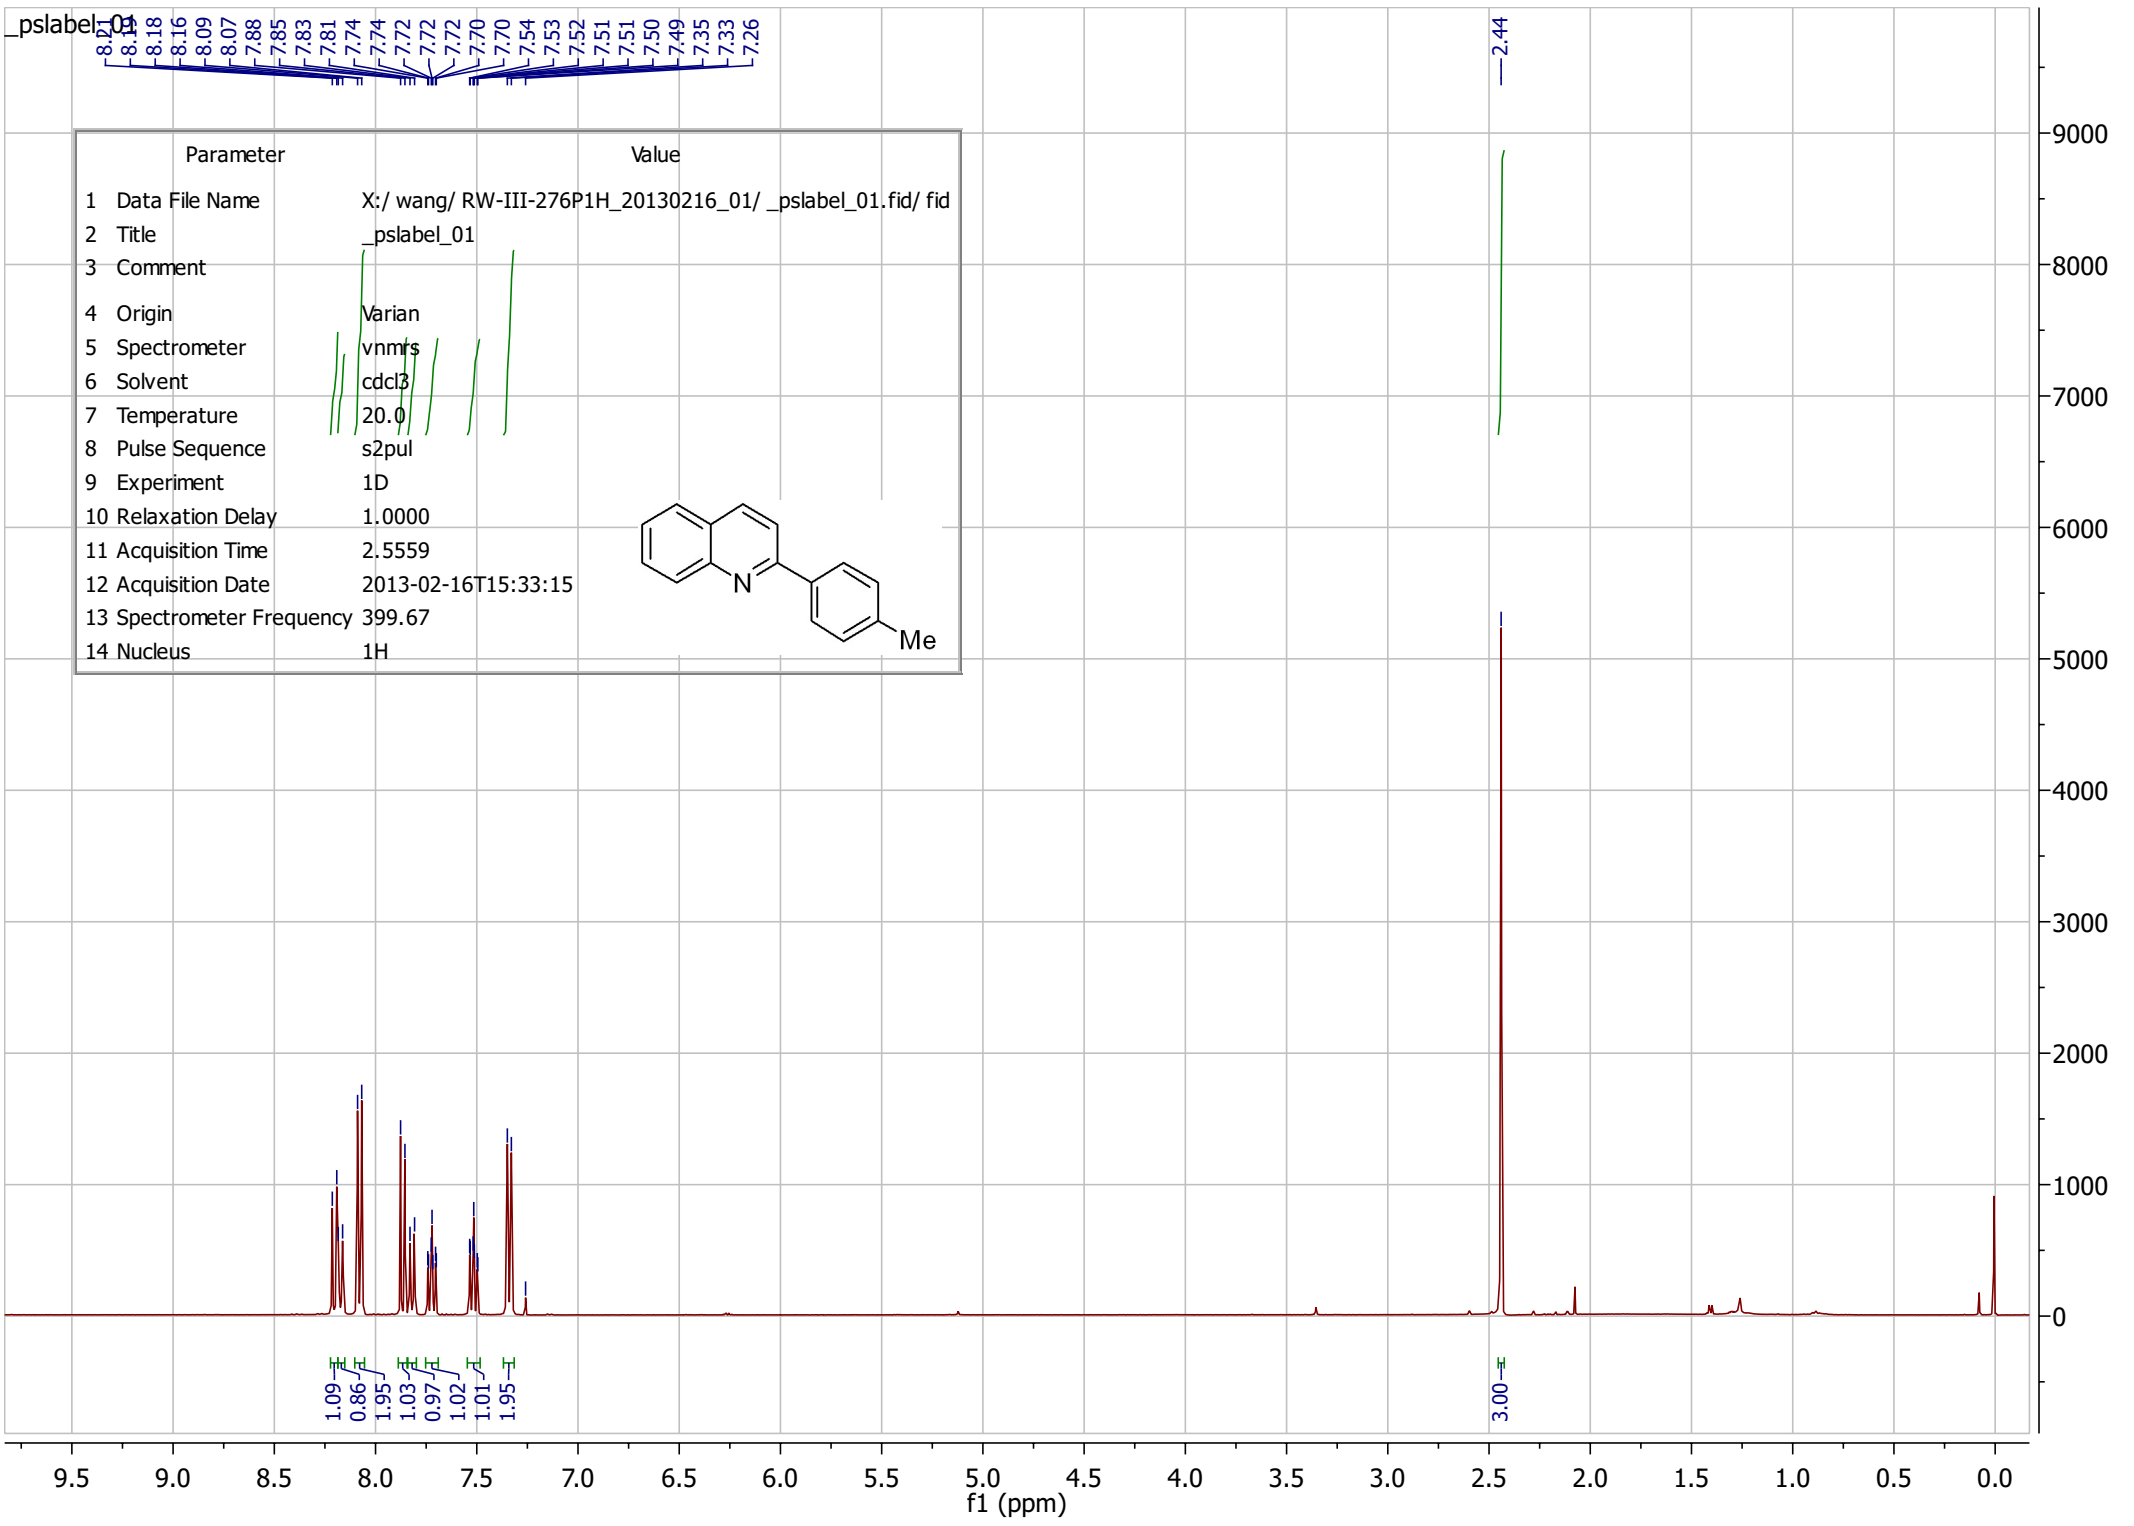

| Parameter                 | Value                                                    |
|---------------------------|----------------------------------------------------------|
| 1 Data File Name          | X:/ wang/ RW-III-276P1H_20130216_01/_pslabel_01.fid/ fid |
| 2 Title                   | _pslabel_01                                              |
| 3 Comment                 |                                                          |
| 4 Origin                  | Varian                                                   |
| 5 Spectrometer            | vnmr5                                                    |
| 6 Solvent                 | cdcl3                                                    |
| 7 Temperature             | 20.0                                                     |
| 8 Pulse Sequence          | s2pul                                                    |
| 9 Experiment              | 1D                                                       |
| 10 Relaxation Delay       | 1.0000                                                   |
| 11 Acquisition Time       | 2.5559                                                   |
| 12 Acquisition Date       | 2013-02-16T15:33:15                                      |
| 13 Spectrometer Frequency | 399.67                                                   |
| 14 Nucleus                | 1H                                                       |

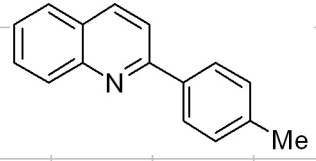

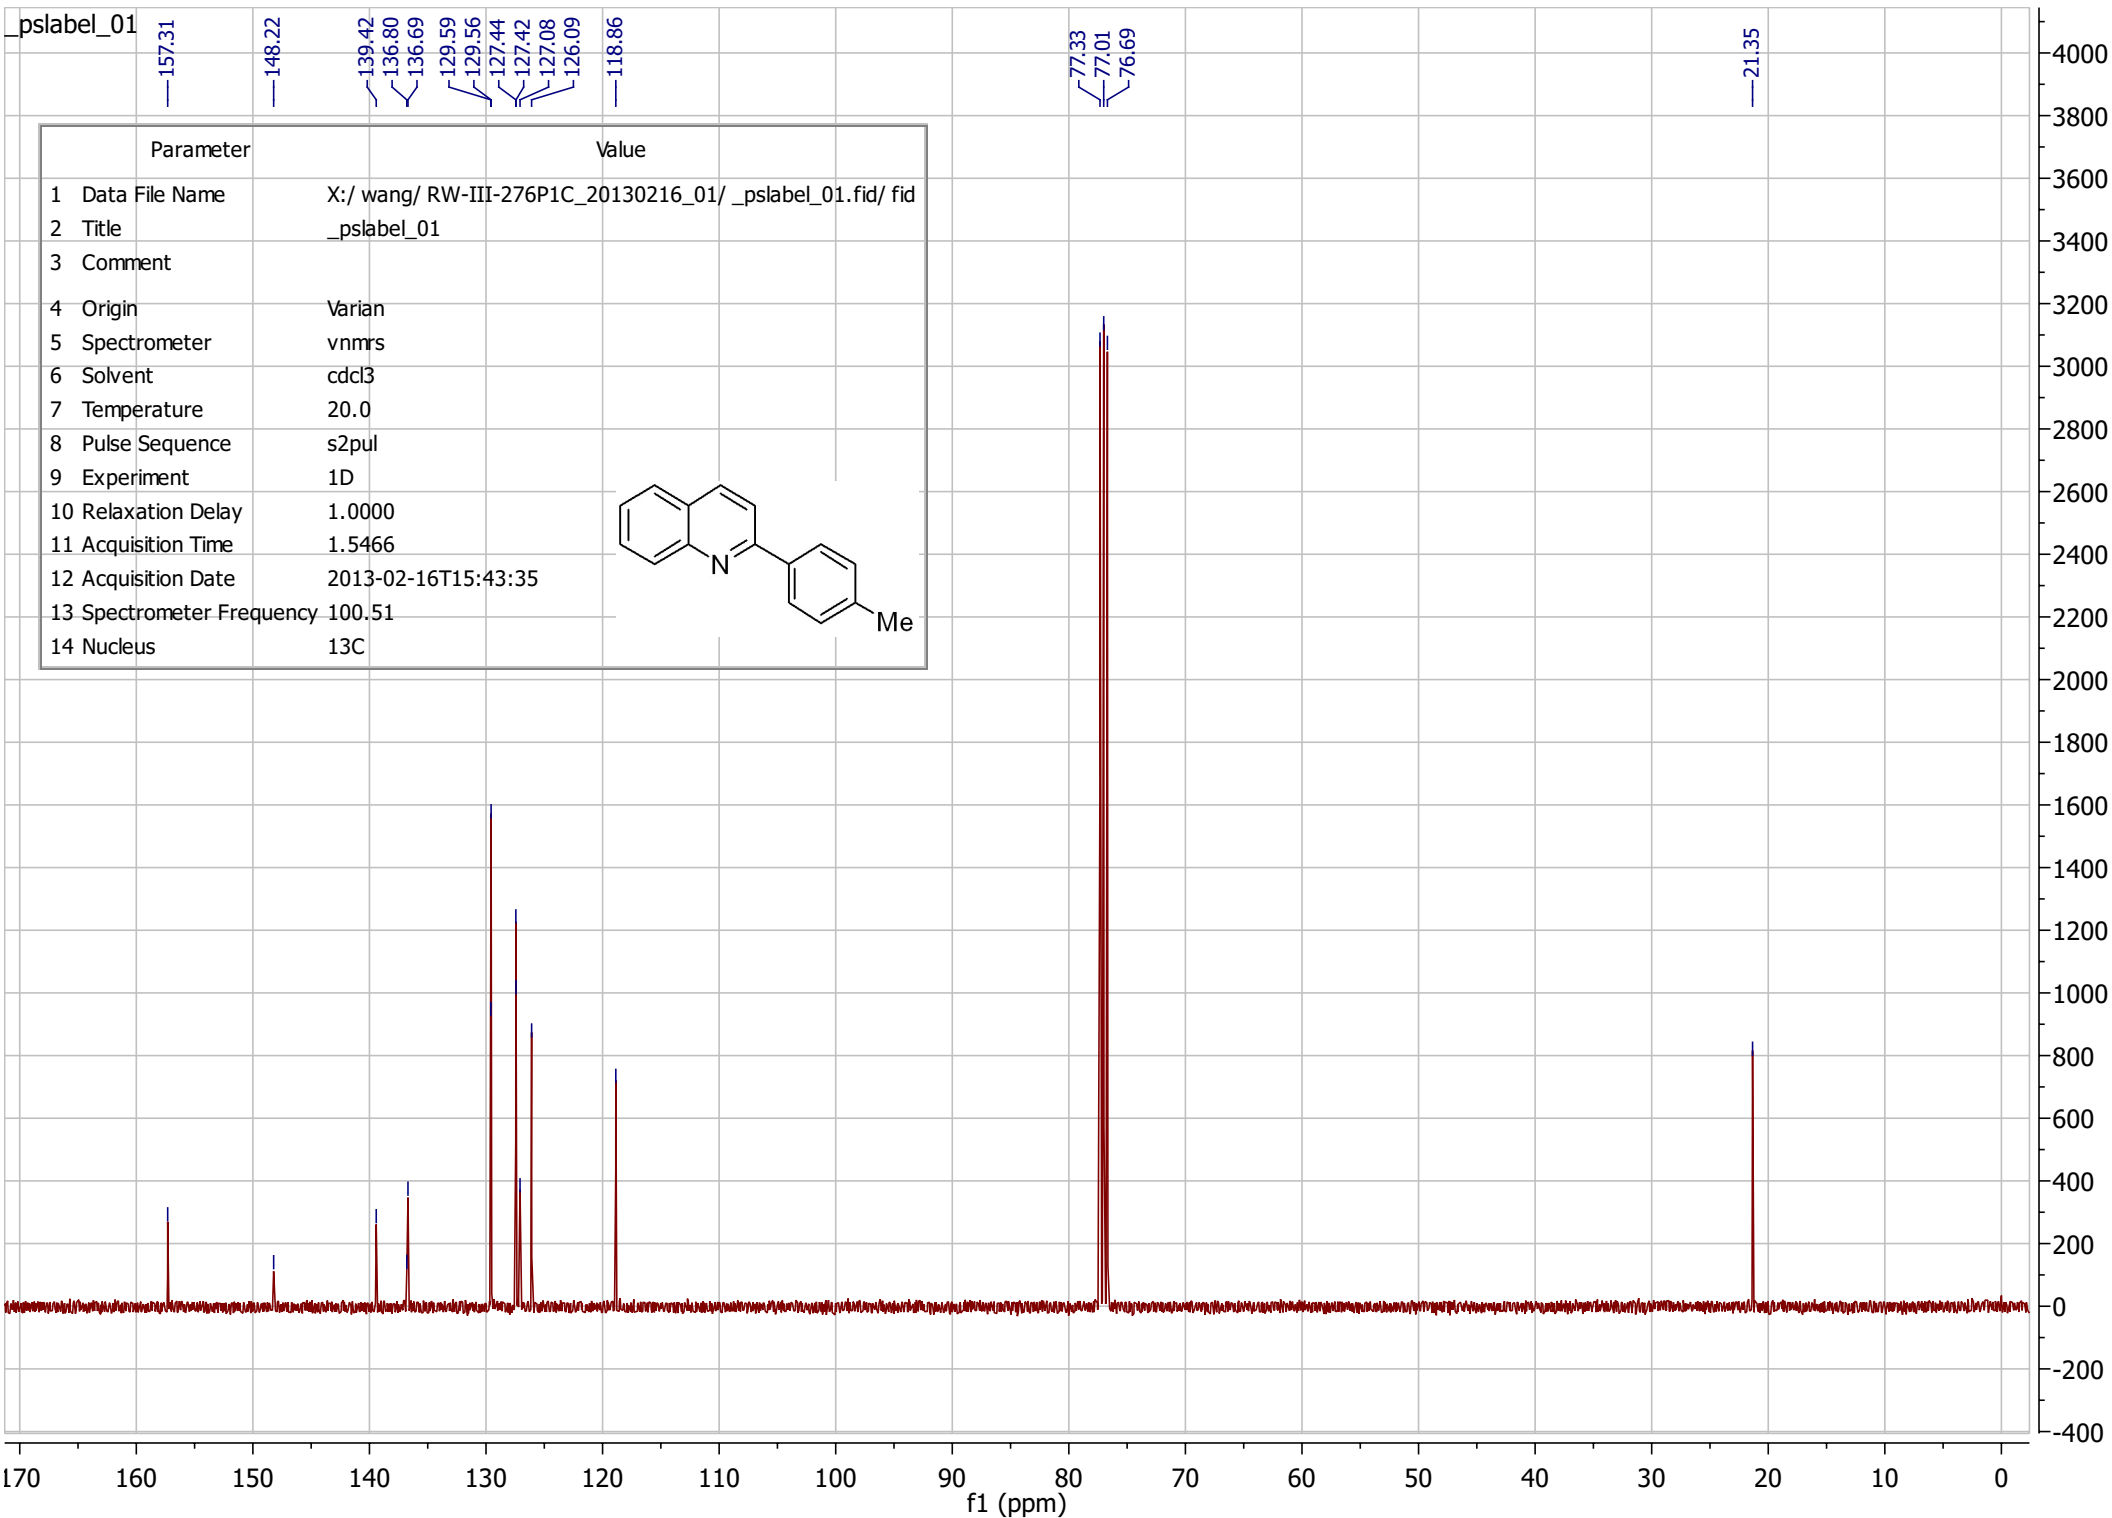

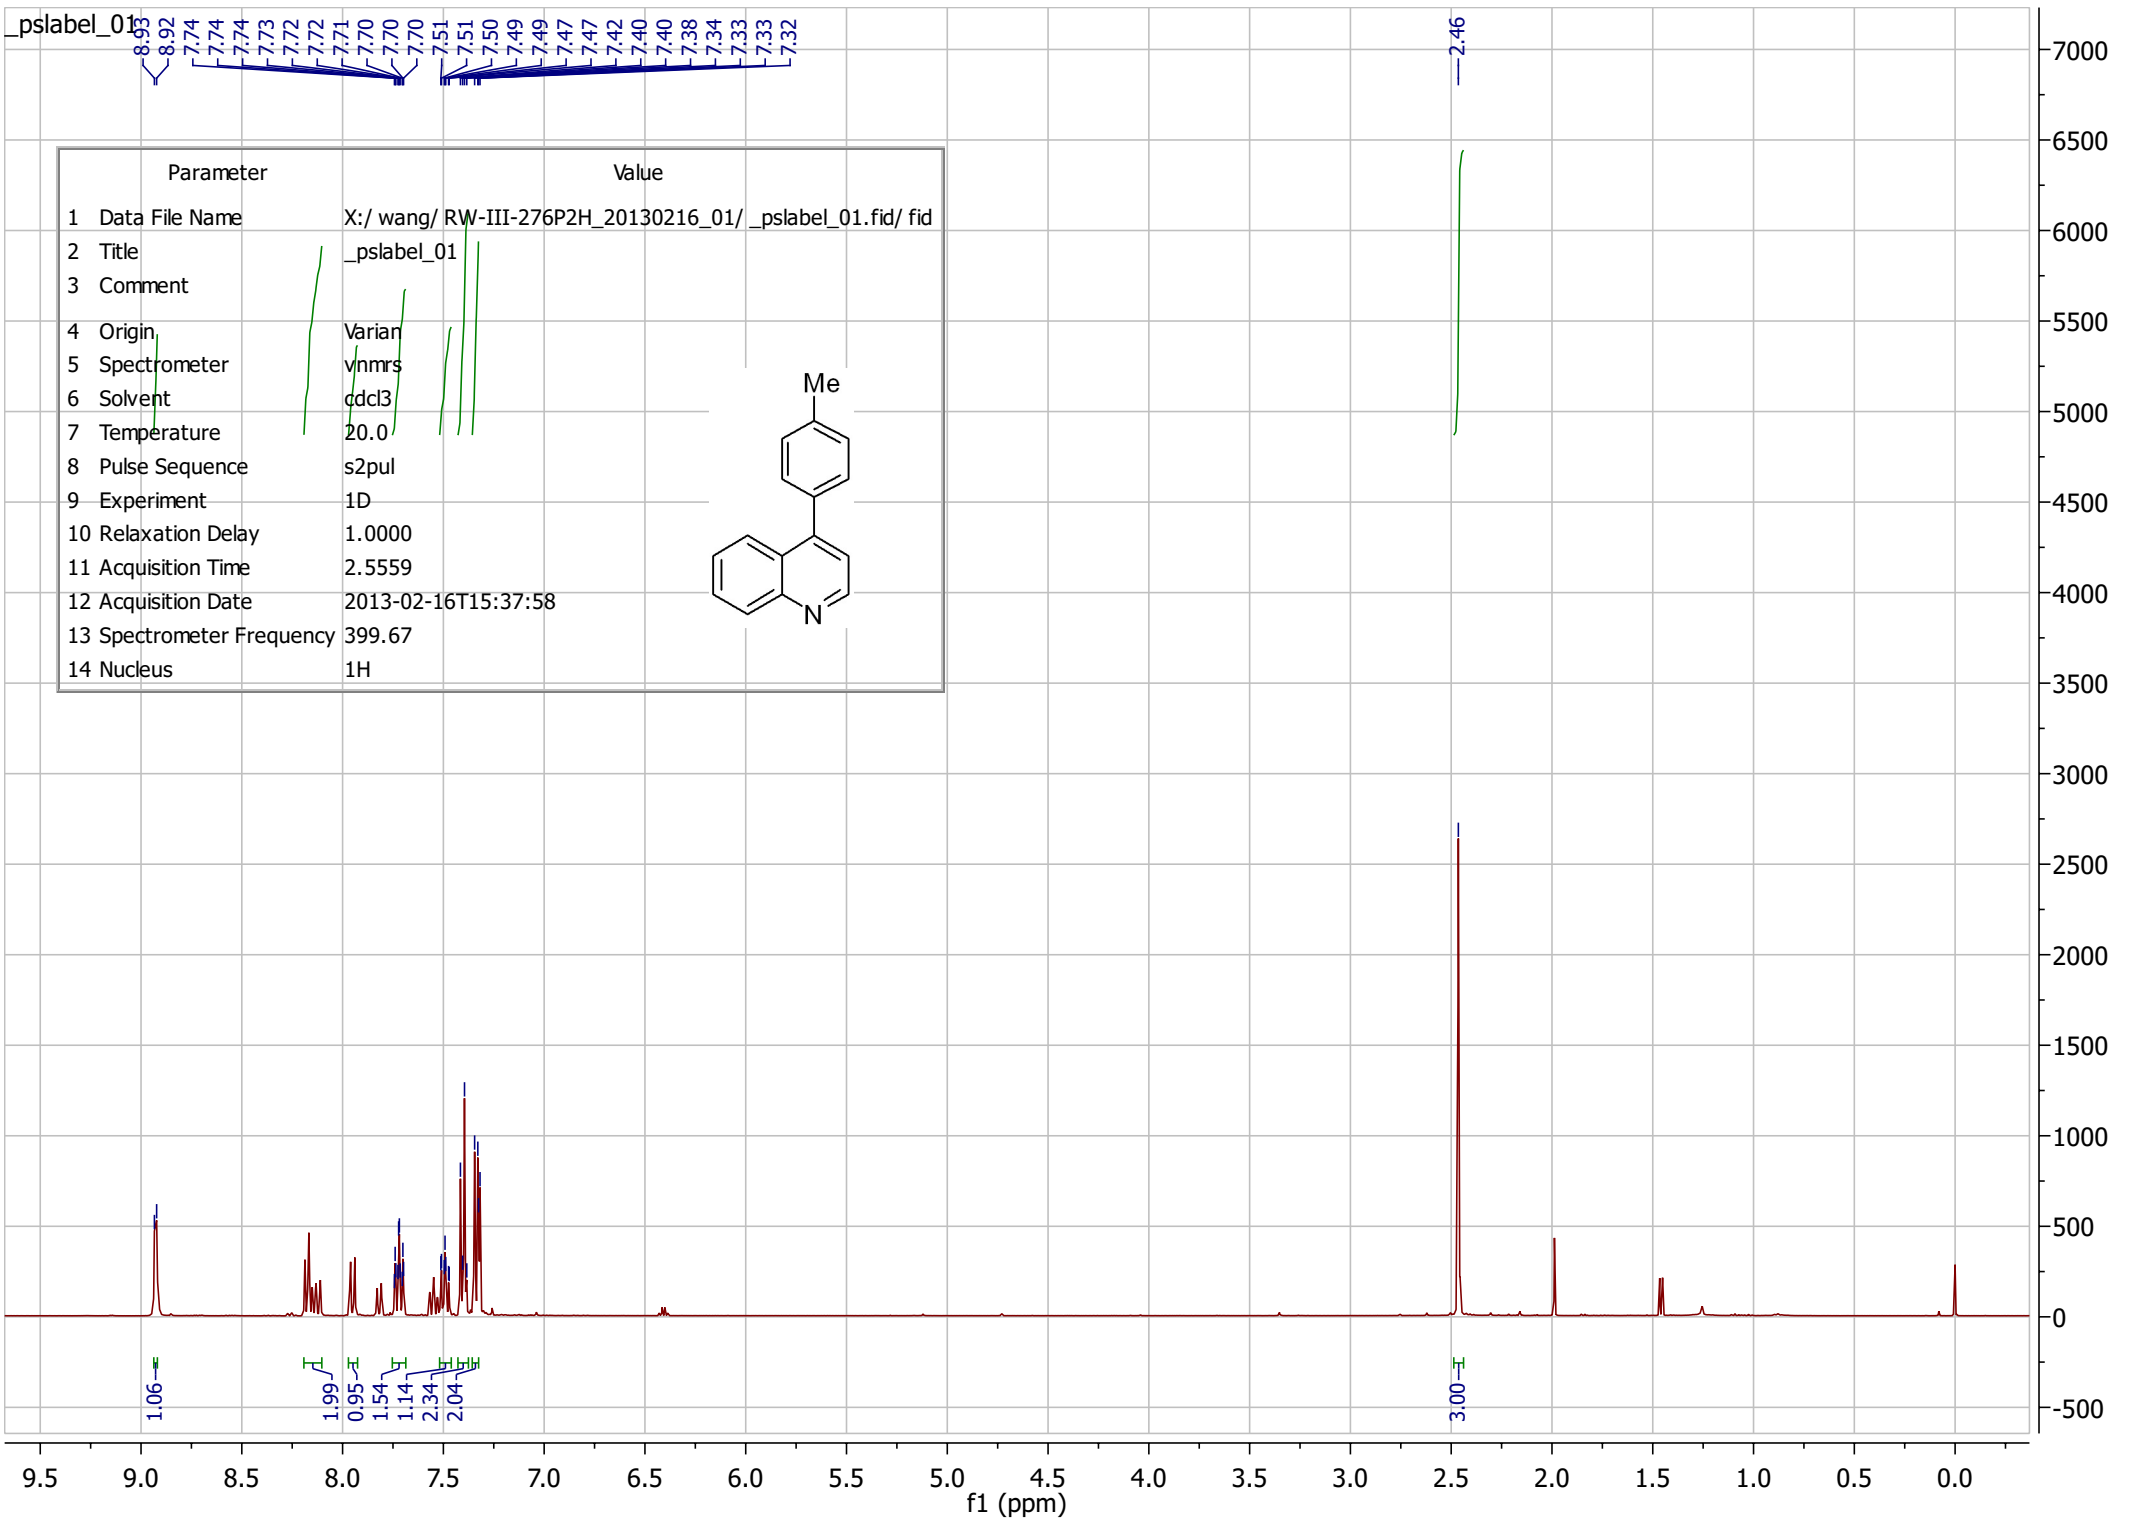

| Parameter                 | Value                                                    |
|---------------------------|----------------------------------------------------------|
| 1 Data File Name          | X:/ wang/ RW-III-276P2H_20130216_01/_pslabel_01.fid/ fid |
| 2 Title                   | _pslabel_01                                              |
| 3 Comment                 |                                                          |
| 4 Origin                  | Varian                                                   |
| 5 Spectrometer            | vnmrs                                                    |
| 6 Solvent                 | cdcl3                                                    |
| 7 Temperature             | 20.0                                                     |
| 8 Pulse Sequence          | s2pul                                                    |
| 9 Experiment              | 1D                                                       |
| 10 Relaxation Delay       | 1.0000                                                   |
| 11 Acquisition Time       | 2.5559                                                   |
| 12 Acquisition Date       | 2013-02-16T15:37:58                                      |
| 13 Spectrometer Frequency | 399.67                                                   |
| 14 Nucleus                | 1H                                                       |

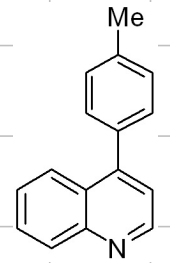



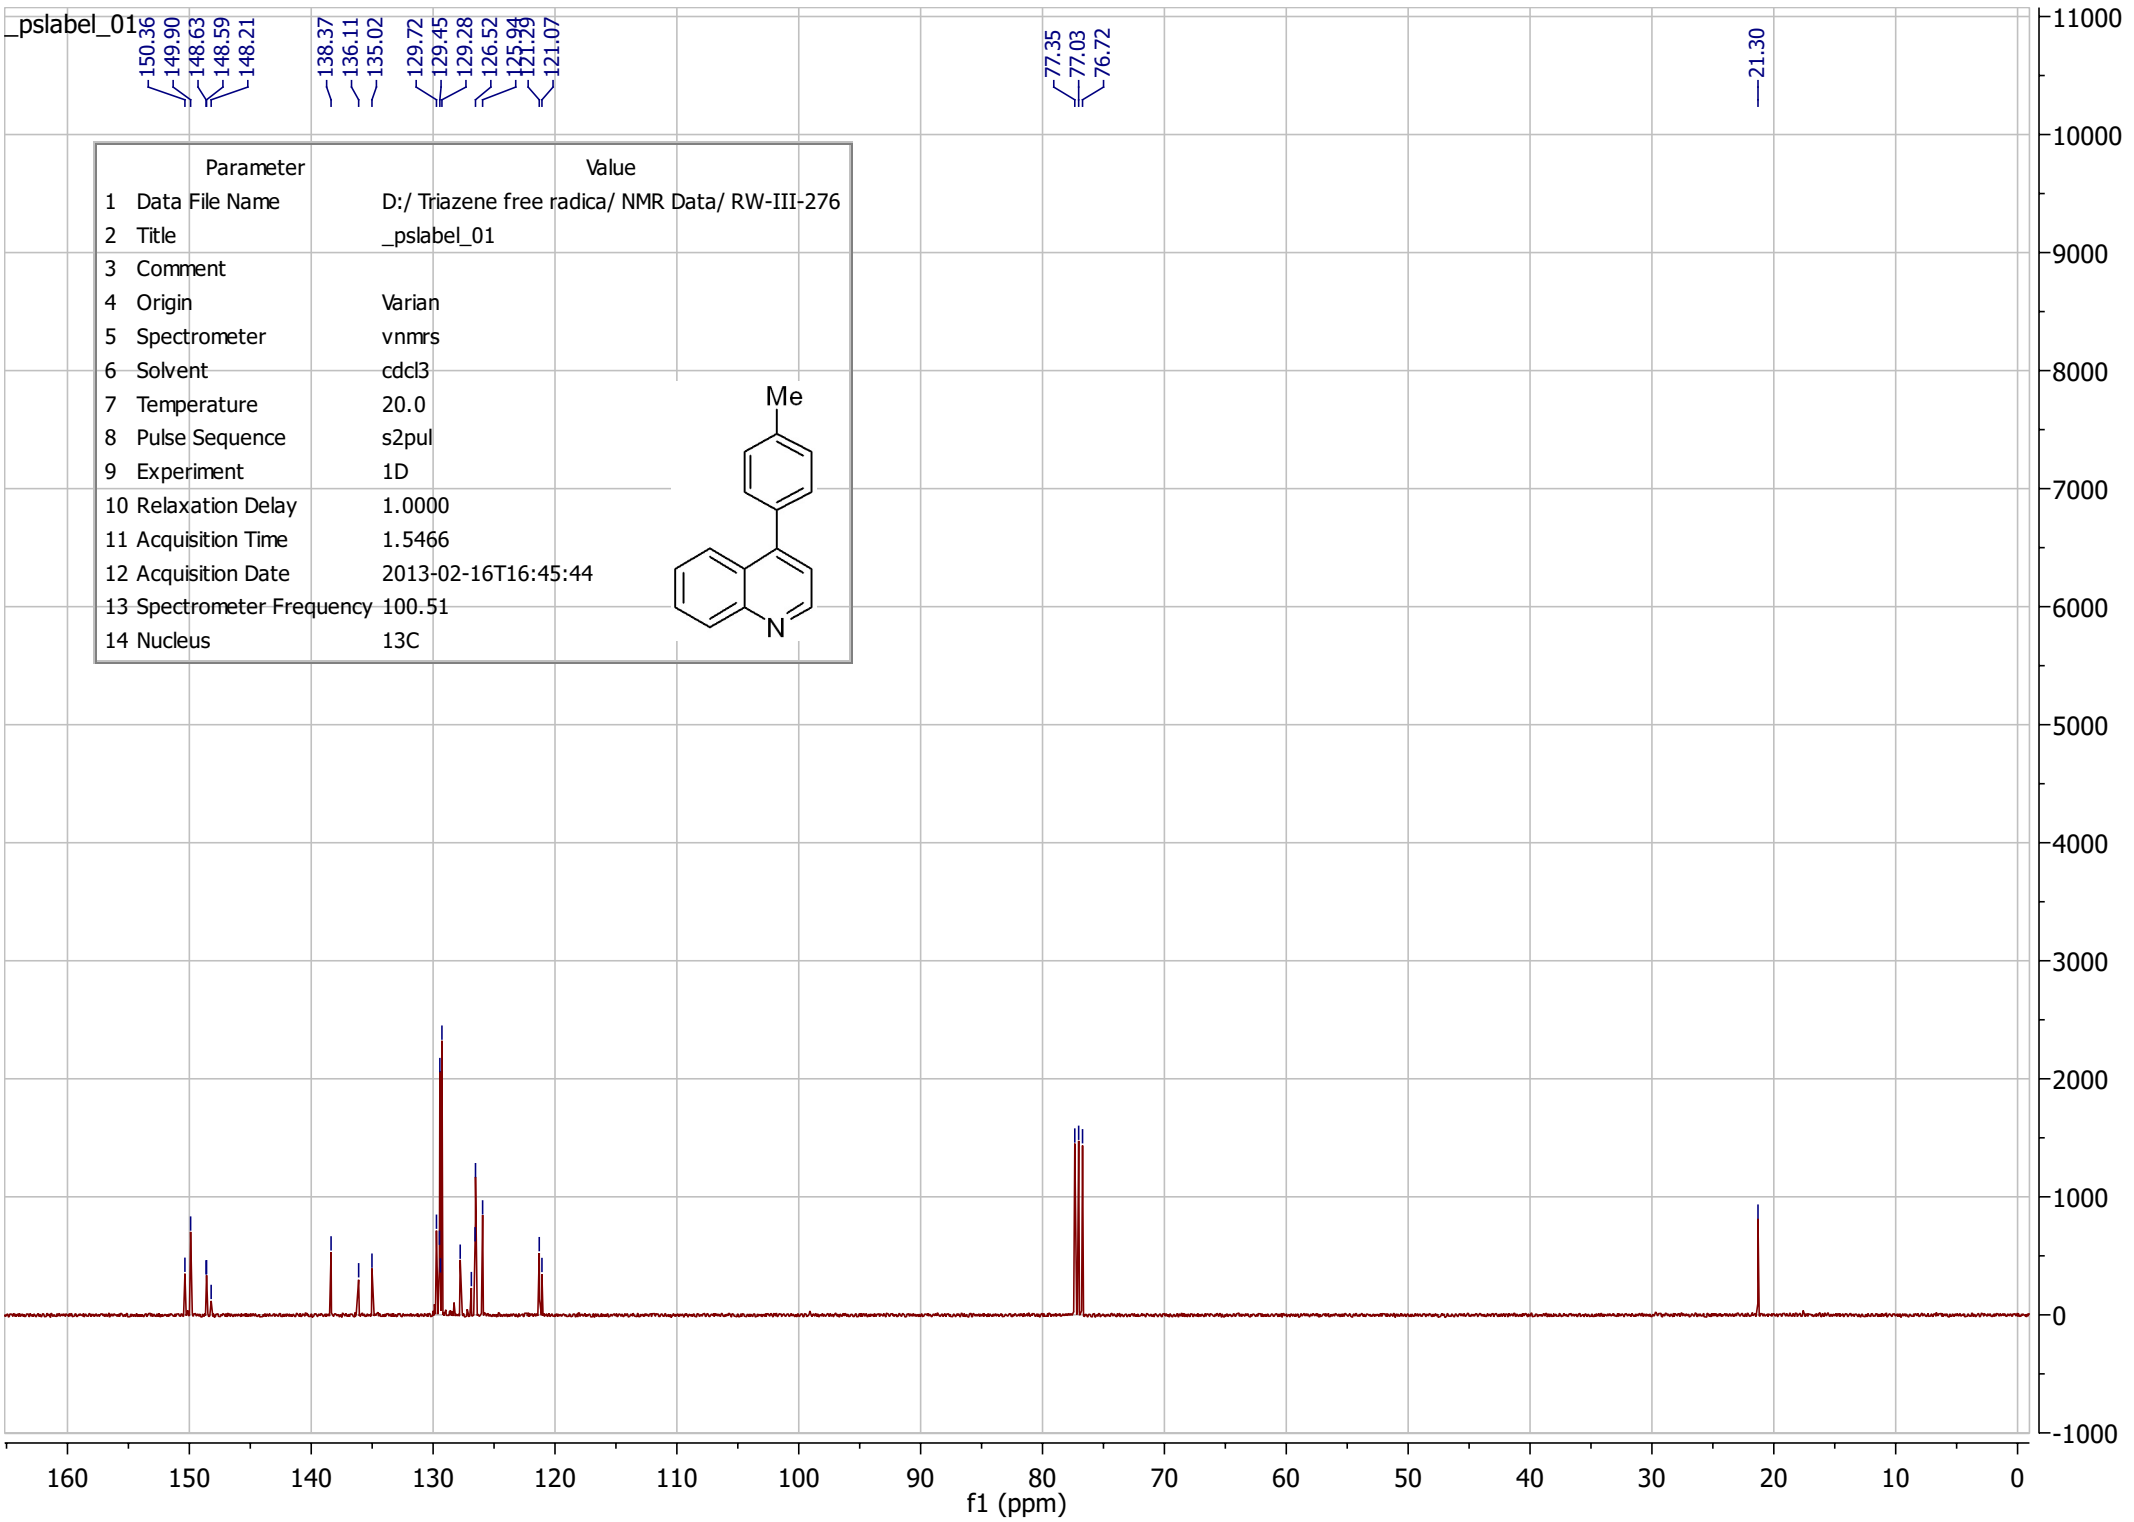

| Parameter                 | Value                                          |
|---------------------------|------------------------------------------------|
| 1 Data File Name          | D:/ Triazene free radica/ NMR Data/ RW-III-276 |
| 2 Title                   | _pslabel_01                                    |
| 3 Comment                 |                                                |
| 4 Origin                  | Varian                                         |
| 5 Spectrometer            | vnmrs                                          |
| 6 Solvent                 | cdcl3                                          |
| 7 Temperature             | 20.0                                           |
| 8 Pulse Sequence          | s2pul                                          |
| 9 Experiment              | 1D                                             |
| 10 Relaxation Delay       | 1.0000                                         |
| 11 Acquisition Time       | 1.5466                                         |
| 12 Acquisition Date       | 2013-02-16T16:45:44                            |
| 13 Spectrometer Frequency | 100.51                                         |
| 14 Nucleus                | 13C                                            |

8.12  
8.10  
8.07  
8.05  
7.79  
7.63  
7.34  
7.33  
7.26

2.44

|    | Parameter              | Value                 |
|----|------------------------|-----------------------|
| 1  | Data File Name         | Z:/ wang/ RW-III-252H |
| 2  | Title                  |                       |
| 3  | Origin                 | vnmrs                 |
| 4  | Owner                  |                       |
| 5  | Solvent                | cdcl3                 |
| 6  | Pulse Sequence         | s2pul                 |
| 7  | Acquisition Date       | 2013-01-19T14:55:33   |
| 8  | Modification Date      |                       |
| 9  | Temperature            | 20.0                  |
| 10 | Number of Scans        | 33                    |
| 11 | Spectrometer Frequency | 399.67                |
| 12 | Spectral Width         | 6410.3                |
| 13 | Lowest Frequency       | -807.1                |
| 14 | Nucleus                | 1H                    |
| 15 | Acquired Size          | 16384                 |
| 16 | Spectral Size          | 32768                 |

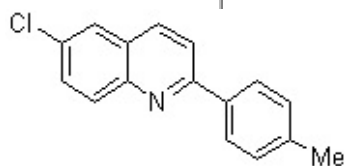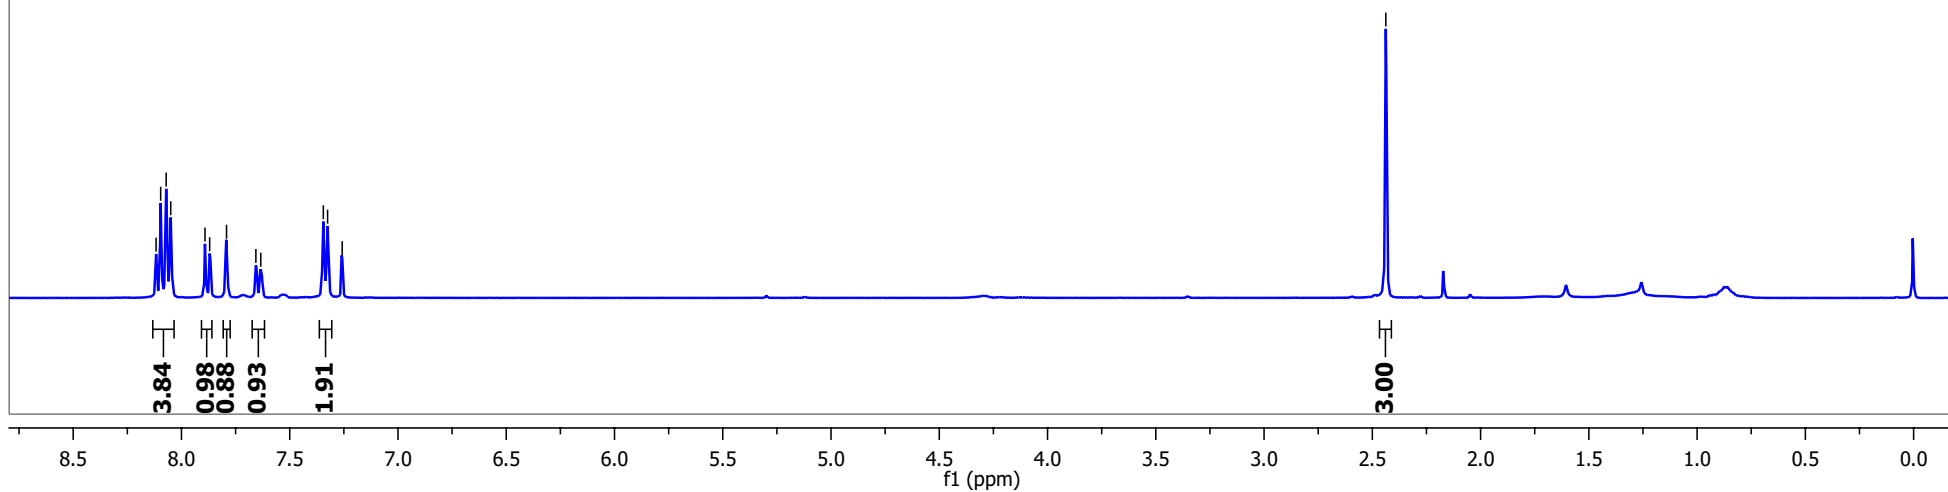

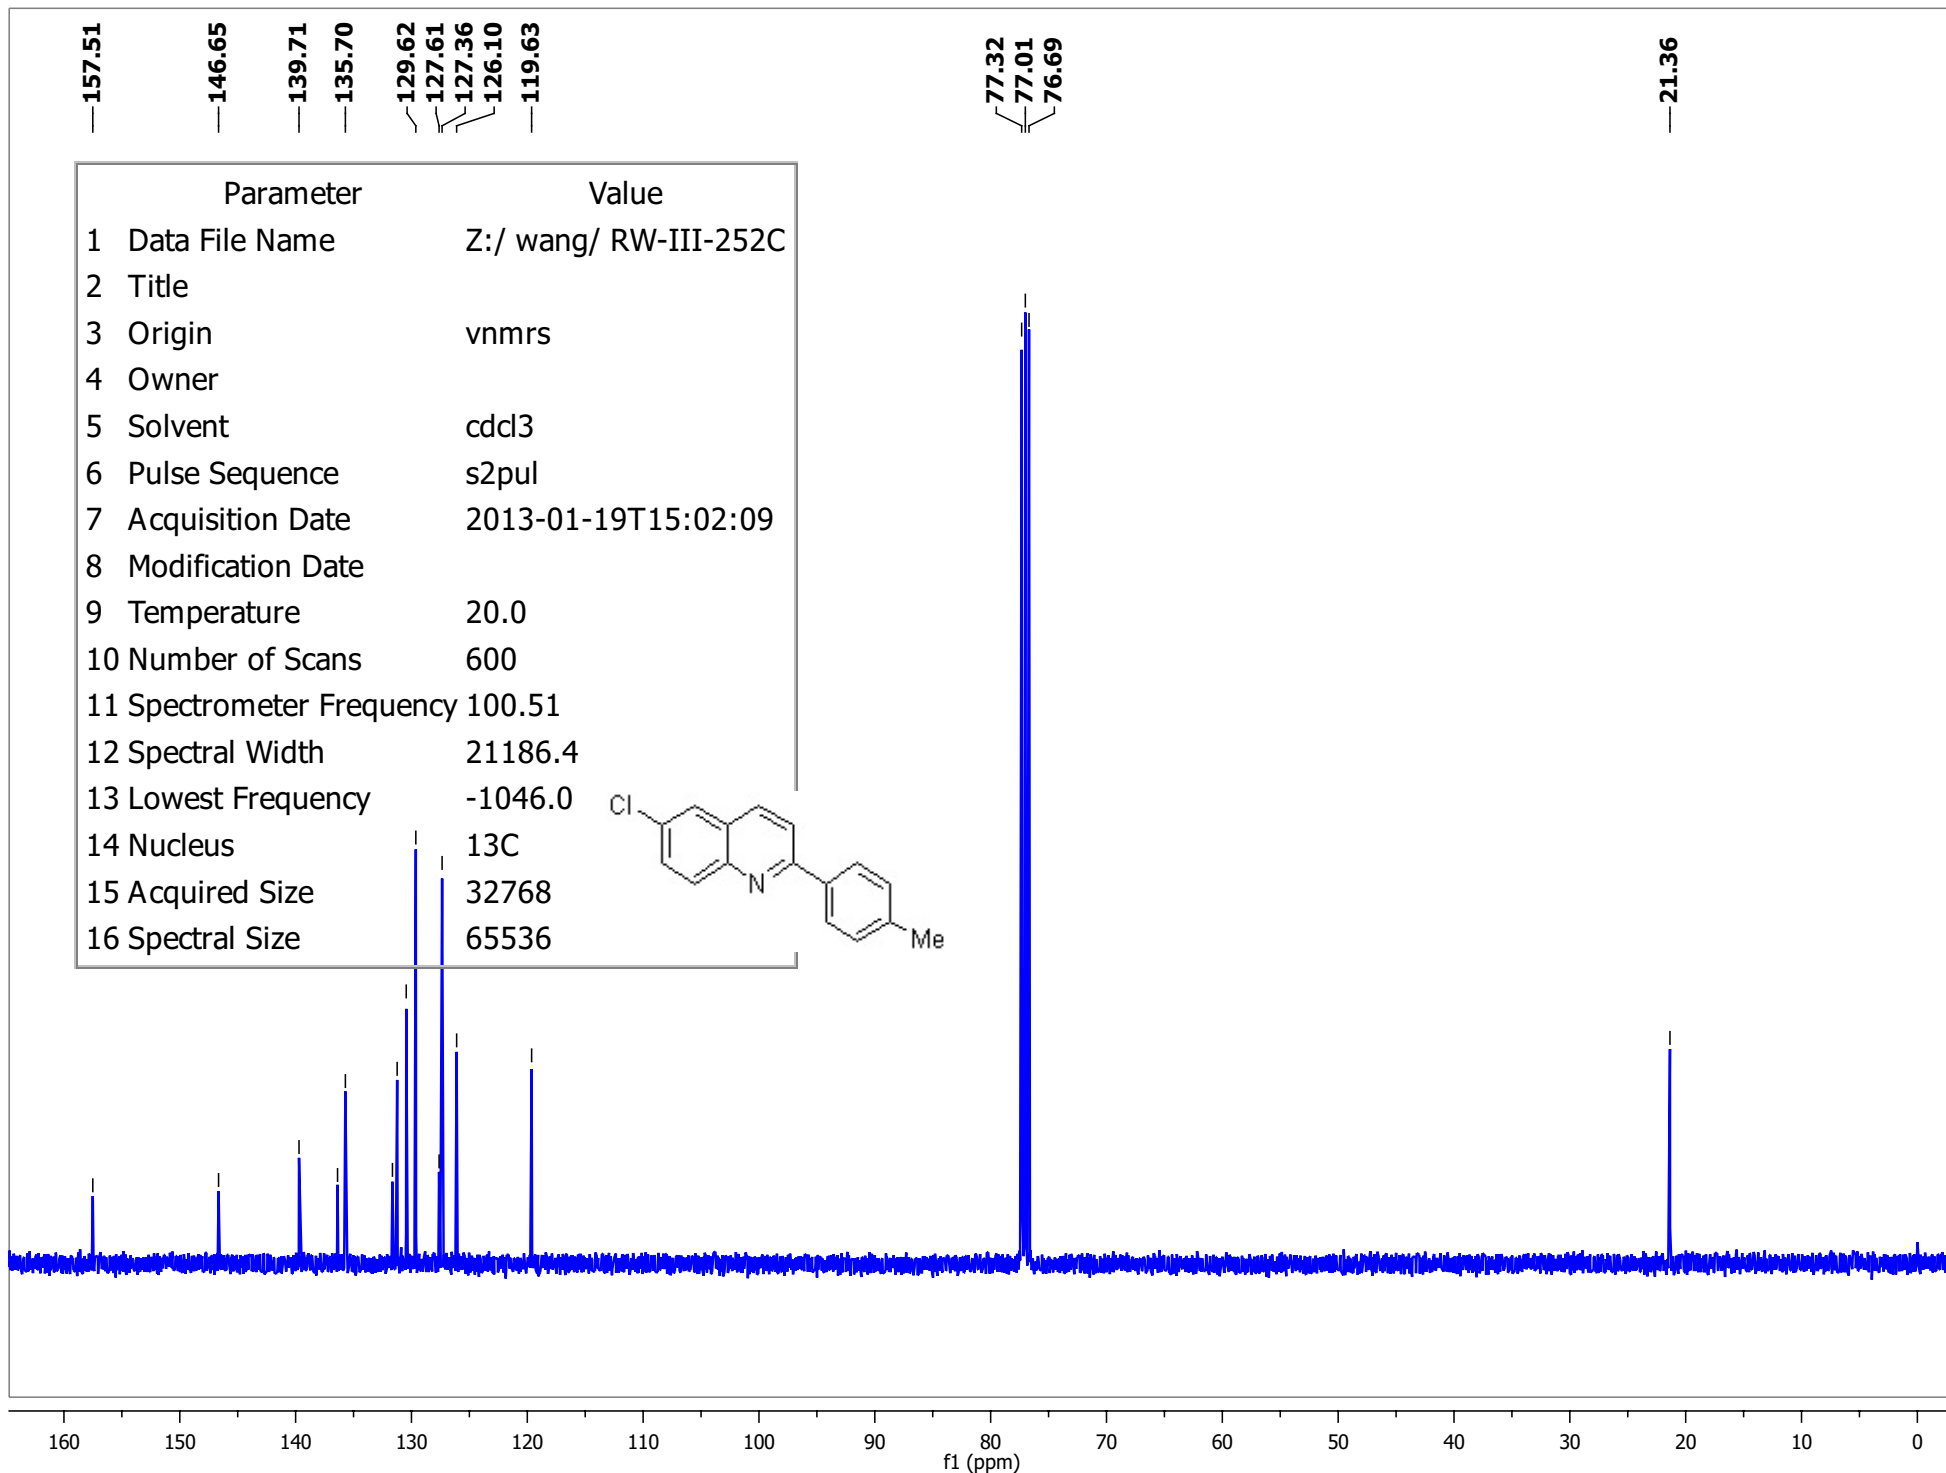

\_pslabel\_02

8.61  
8.60  
8.14  
8.12  
7.89  
7.87  
7.70  
7.69  
7.66  
7.64  
7.62  
7.61  
7.59  
7.55  
7.53  
7.51  
7.35  
7.33

| Parameter                 | Value                                                    |
|---------------------------|----------------------------------------------------------|
| 1 Data File Name          | X:/ wang/ RW-III-277P2_20130217_01/ _pslabel_02.fid/ fid |
| 2 Title                   | _pslabel_02                                              |
| 3 Comment                 |                                                          |
| 4 Origin                  | Varian                                                   |
| 5 Spectrometer            | vnmr5                                                    |
| 6 Solvent                 | cdcl3                                                    |
| 7 Temperature             | 20.0                                                     |
| 8 Pulse Sequence          | s2pul                                                    |
| 9 Experiment              | 1D                                                       |
| 10 Relaxation Delay       | 1.0000                                                   |
| 11 Acquisition Time       | 2.5559                                                   |
| 12 Acquisition Date       | 2013-02-17T12:12:25                                      |
| 13 Spectrometer Frequency | 399.67                                                   |
| 14 Nucleus                | 1H                                                       |

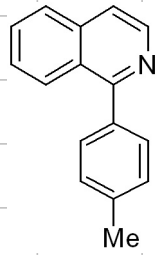

2.46

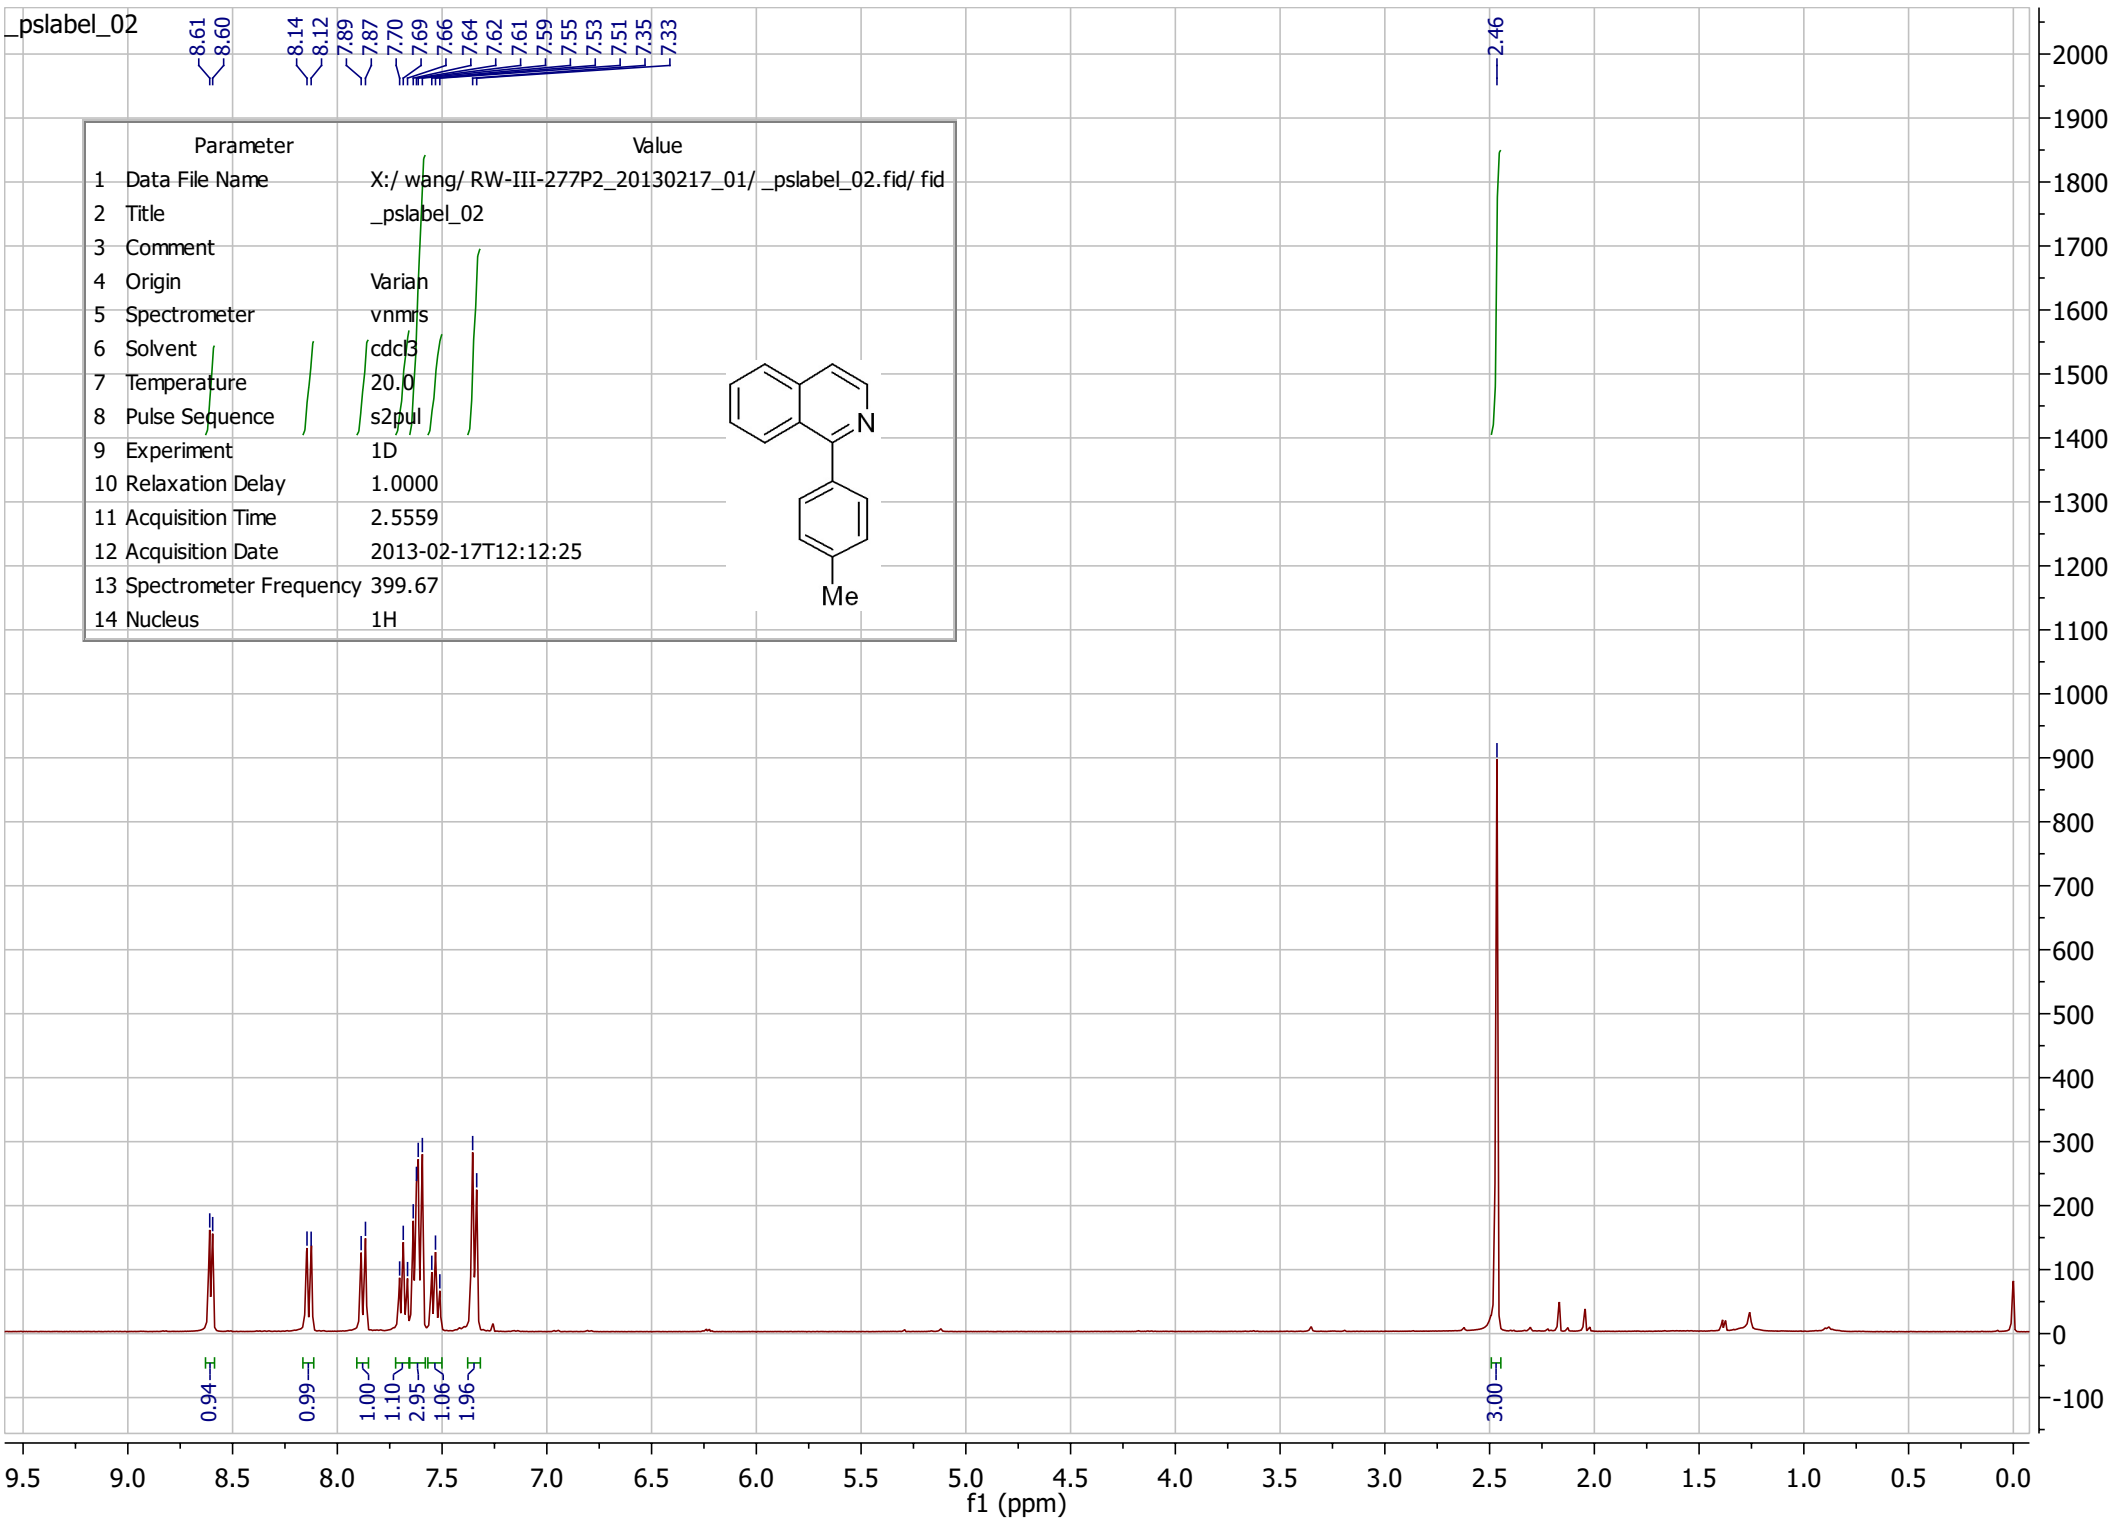

\_pslabel\_01

| Parameter                 | Value                                                   |
|---------------------------|---------------------------------------------------------|
| 1 Data File Name          | X:/ wang/ RW-III-277P2_20130217_01/_pslabel_01.fid/ fid |
| 2 Title                   | _pslabel_01                                             |
| 3 Comment                 |                                                         |
| 4 Origin                  | Varian                                                  |
| 5 Spectrometer            | vnmrs                                                   |
| 6 Solvent                 | cdcl3                                                   |
| 7 Temperature             | 20.0                                                    |
| 8 Pulse Sequence          | s2pul                                                   |
| 9 Experiment              | 1D                                                      |
| 10 Relaxation Delay       | 1.0000                                                  |
| 11 Acquisition Time       | 1.5466                                                  |
| 12 Acquisition Date       | 2013-02-17T08:39:42                                     |
| 13 Spectrometer Frequency | 100.51                                                  |
| 14 Nucleus                | 13C                                                     |

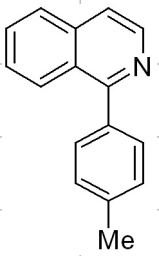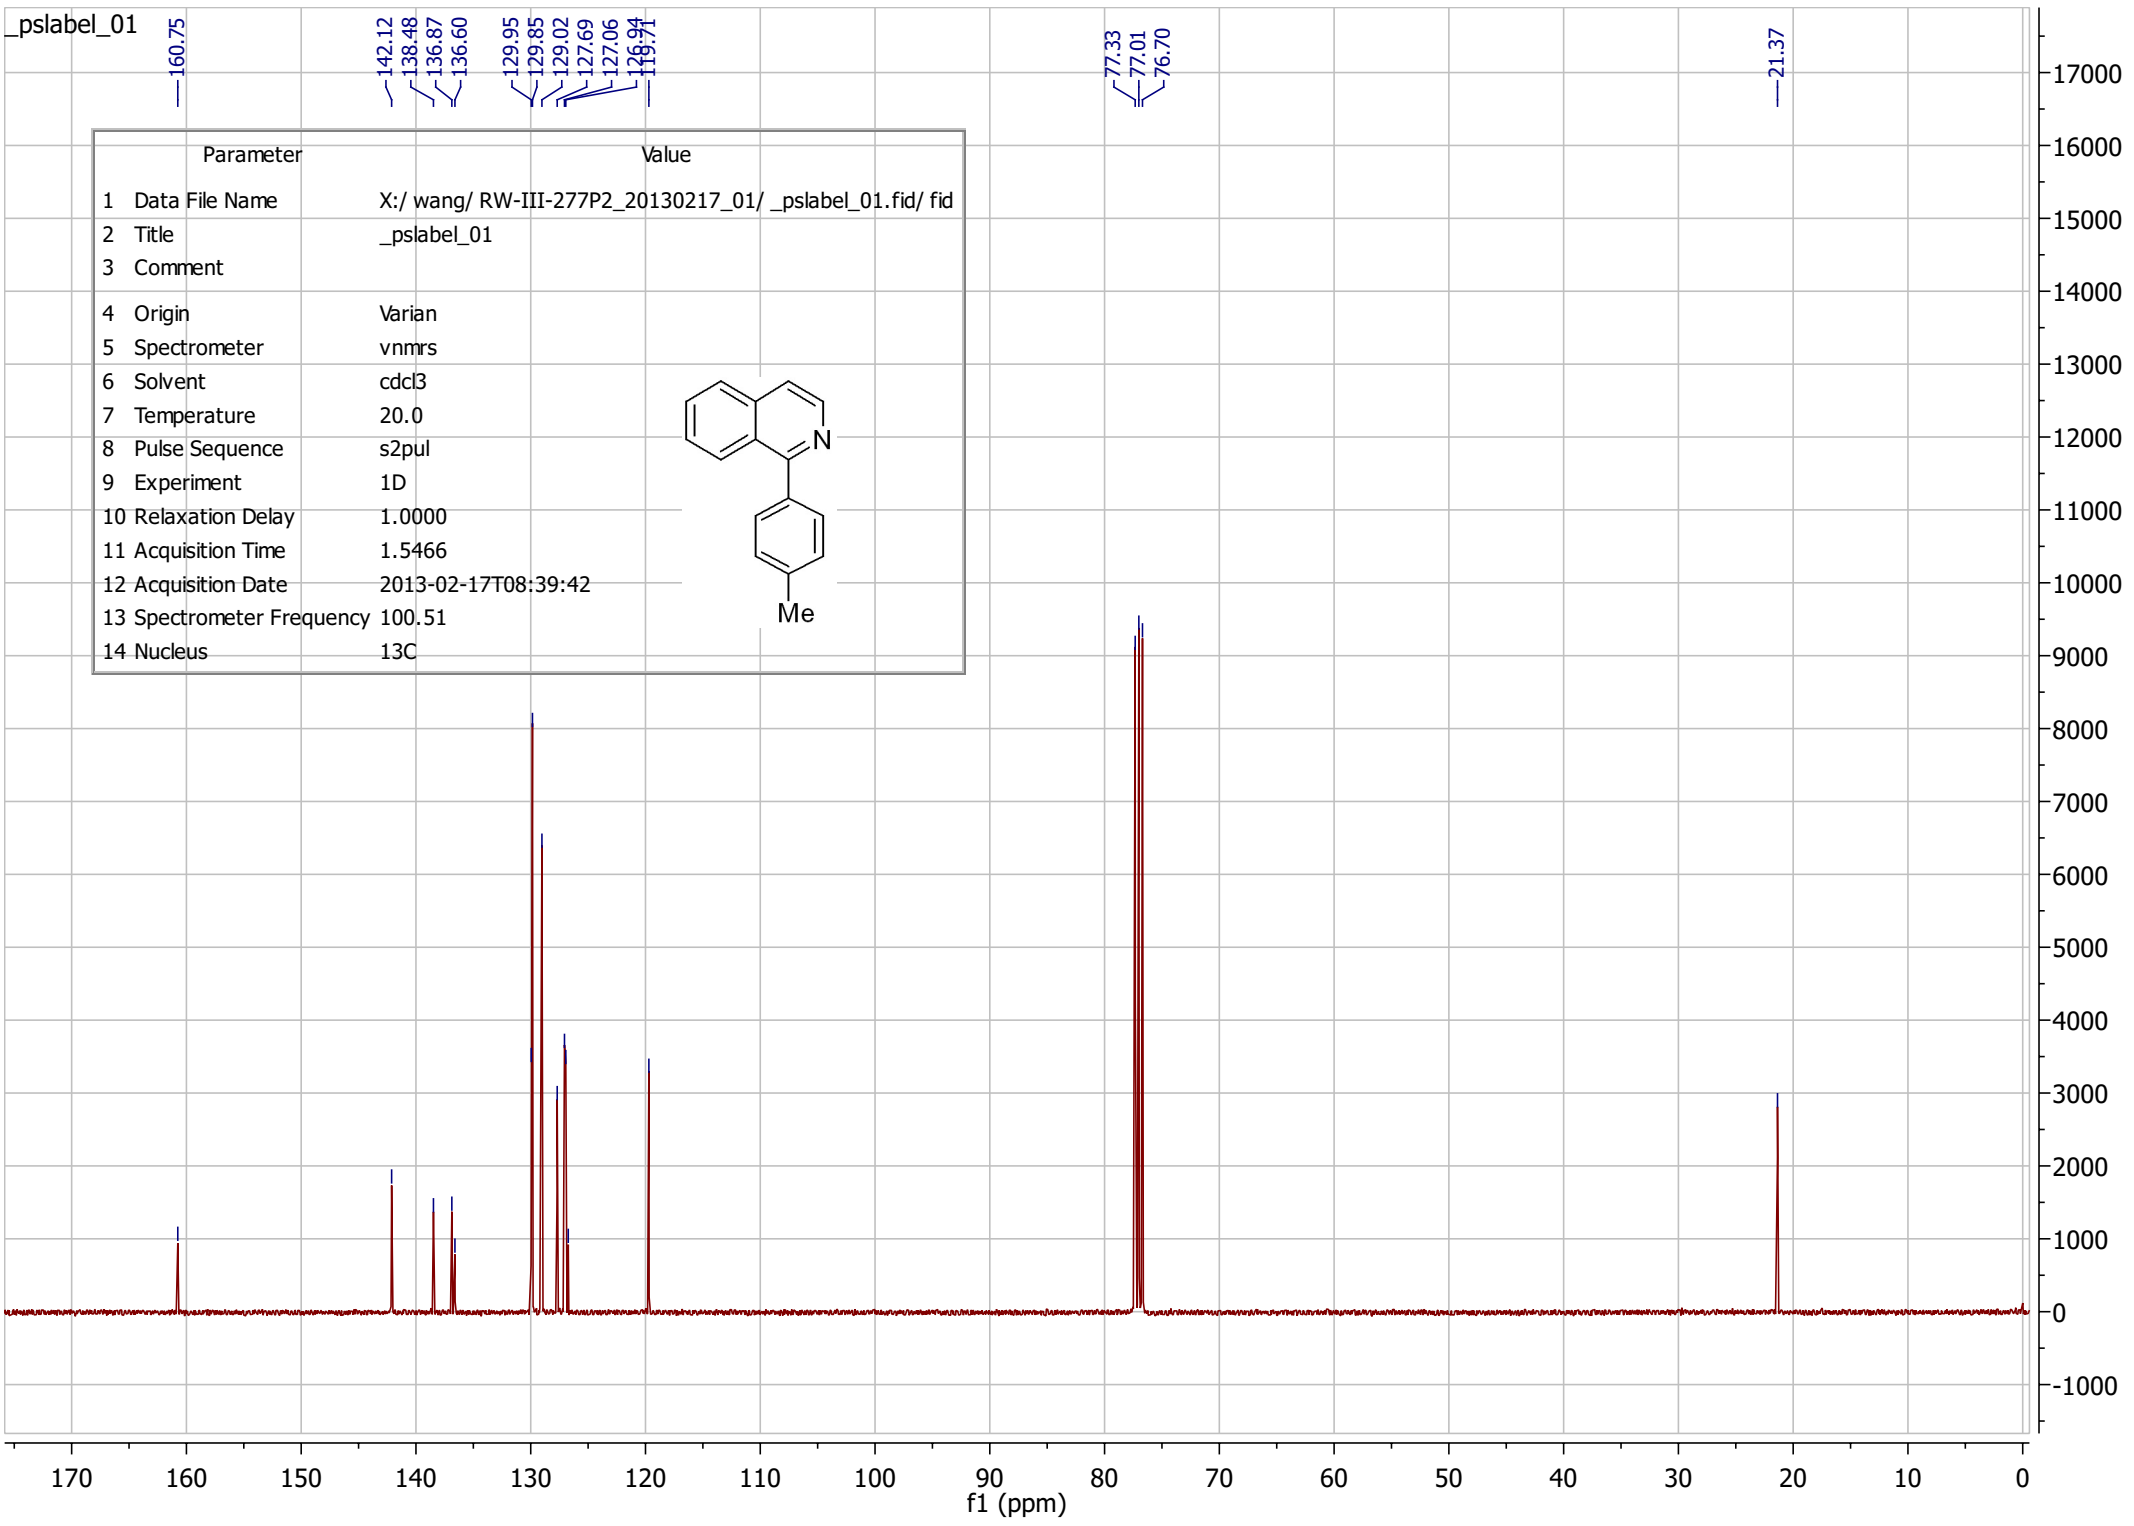

\_pslabel\_01

8.71  
8.69  
8.11  
8.09  
8.01  
7.98  
7.96  
7.58  
7.56  
7.39  
7.37  
7.37  
7.35  
7.33  
7.26

| Parameter                 | Value                                                    |
|---------------------------|----------------------------------------------------------|
| 1 Data File Name          | X:/ wang/ RW-III-281P1_20130220_01/ _pslabel_01.fid/ fid |
| 2 Title                   | _pslabel_01                                              |
| 3 Comment                 |                                                          |
| 4 Origin                  | Varian                                                   |
| 5 Spectrometer            | vhmrs                                                    |
| 6 Solvent                 | cdcl3                                                    |
| 7 Temperature             | 20.0                                                     |
| 8 Pulse Sequence          | s2pul                                                    |
| 9 Experiment              | 1D                                                       |
| 10 Relaxation Delay       | 1.0000                                                   |
| 11 Acquisition Time       | 2.5559                                                   |
| 12 Acquisition Date       | 2013-02-20T16:08:27                                      |
| 13 Spectrometer Frequency | 399.67                                                   |
| 14 Nucleus                | 1H                                                       |

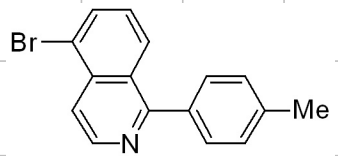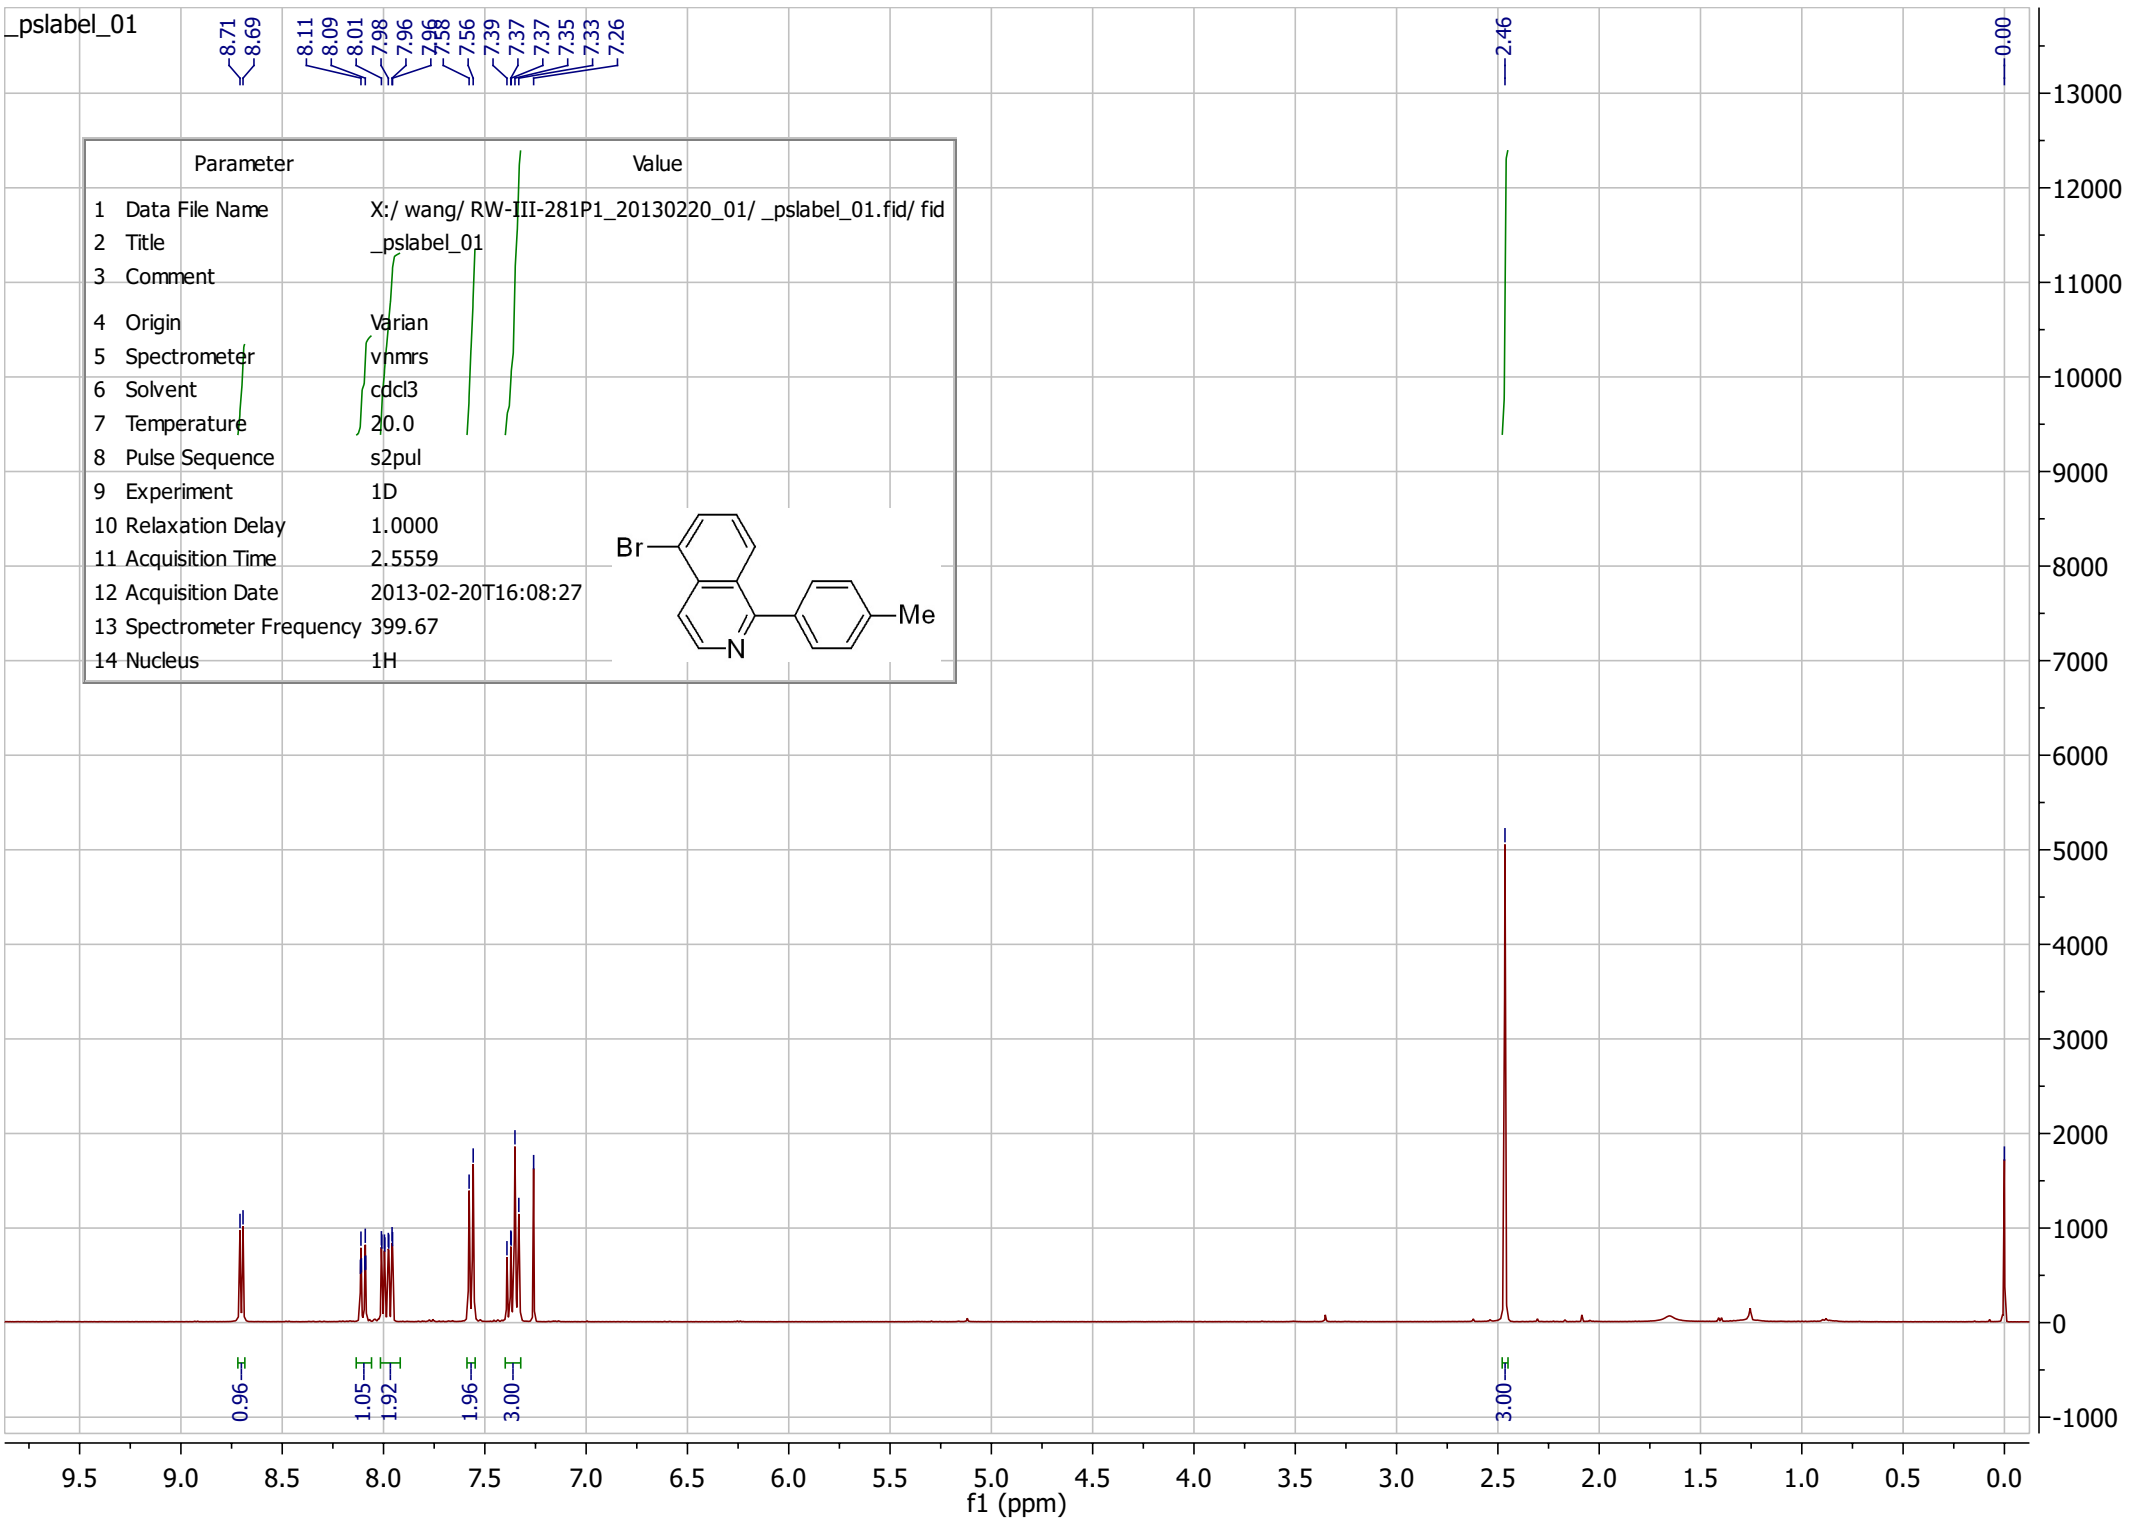

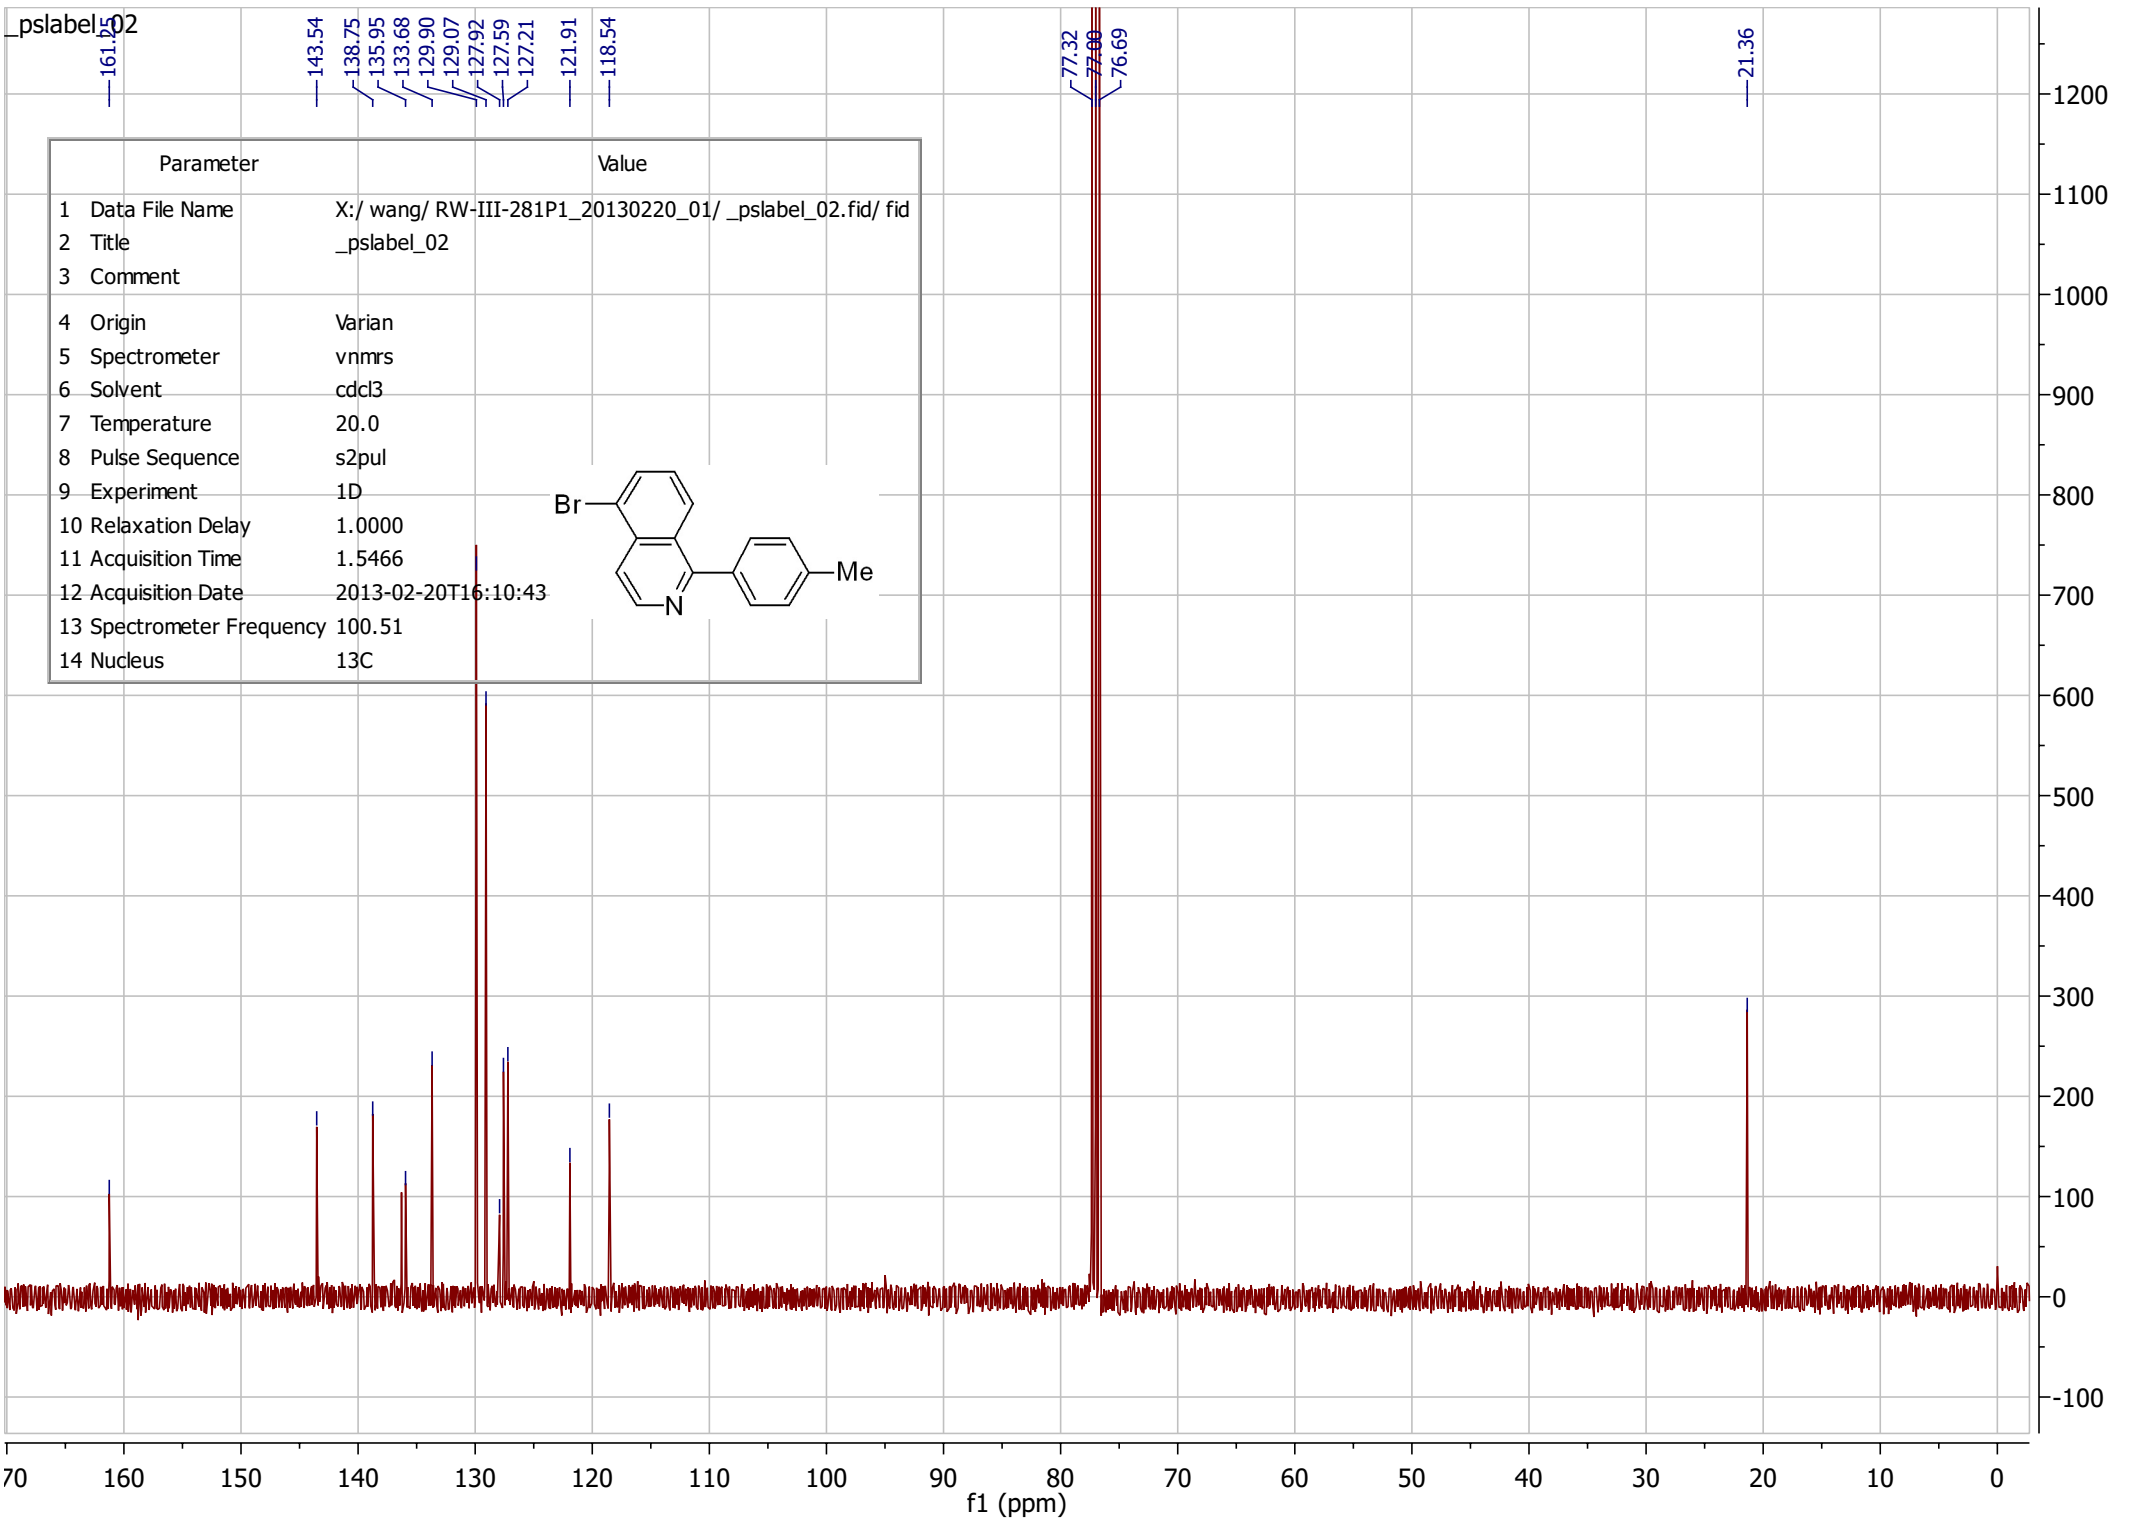

\_pslabel\_02

161.02

143.54

138.75

135.95

133.68

129.90

129.07

127.92

127.59

127.21

121.91

118.54

77.32

77.00

76.69

21.36

f1 (ppm)

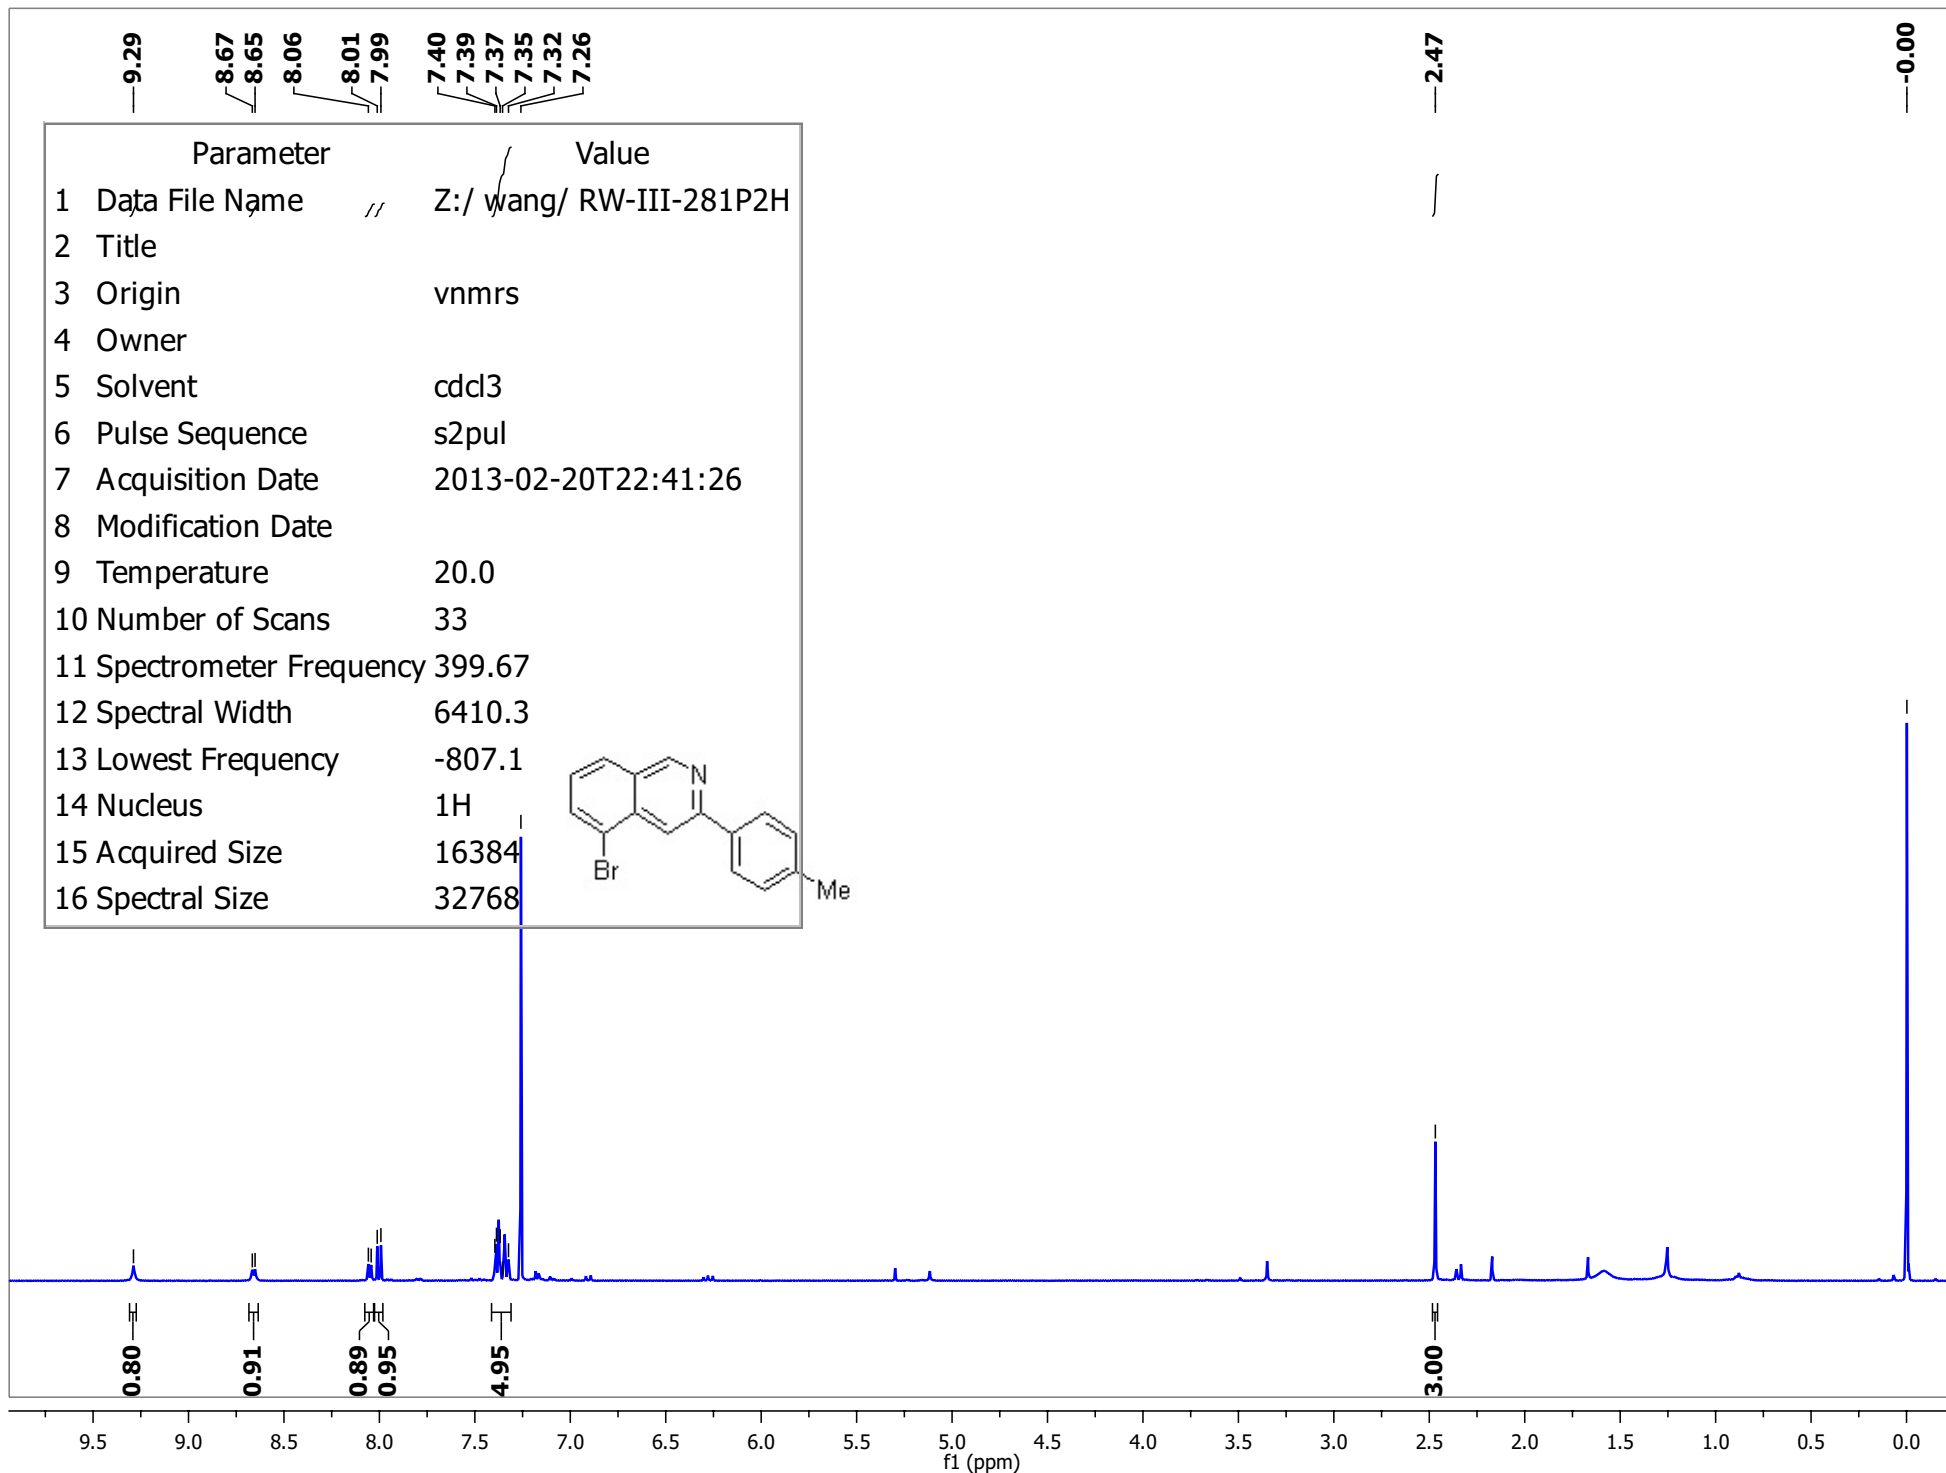



\_pslabel\_02

151.62  
146.13  
144.20  
141.05  
138.13  
135.18  
134.86  
133.53  
129.89  
129.32  
128.55  
120.47  
119.40

77.31  
76.67  
76.67

21.26

| Parameter                 | Value                                                   |
|---------------------------|---------------------------------------------------------|
| 1 Data File Name          | X:/ wang/ RW-III-281P2_20130220_01/_pslabel_02.fid/ fid |
| 2 Title                   | _pslabel_02                                             |
| 3 Comment                 |                                                         |
| 4 Origin                  | Varian                                                  |
| 5 Spectrometer            | vnmrs                                                   |
| 6 Solvent                 | cdcl3                                                   |
| 7 Temperature             | 20.0                                                    |
| 8 Pulse Sequence          | s2pul                                                   |
| 9 Experiment              | 1D                                                      |
| 10 Relaxation Delay       | 1.0000                                                  |
| 11 Acquisition Time       | 1.5466                                                  |
| 12 Acquisition Date       | 2013-02-20T20:57:14                                     |
| 13 Spectrometer Frequency | 100.51                                                  |
| 14 Nucleus                | 13C                                                     |

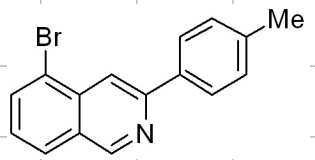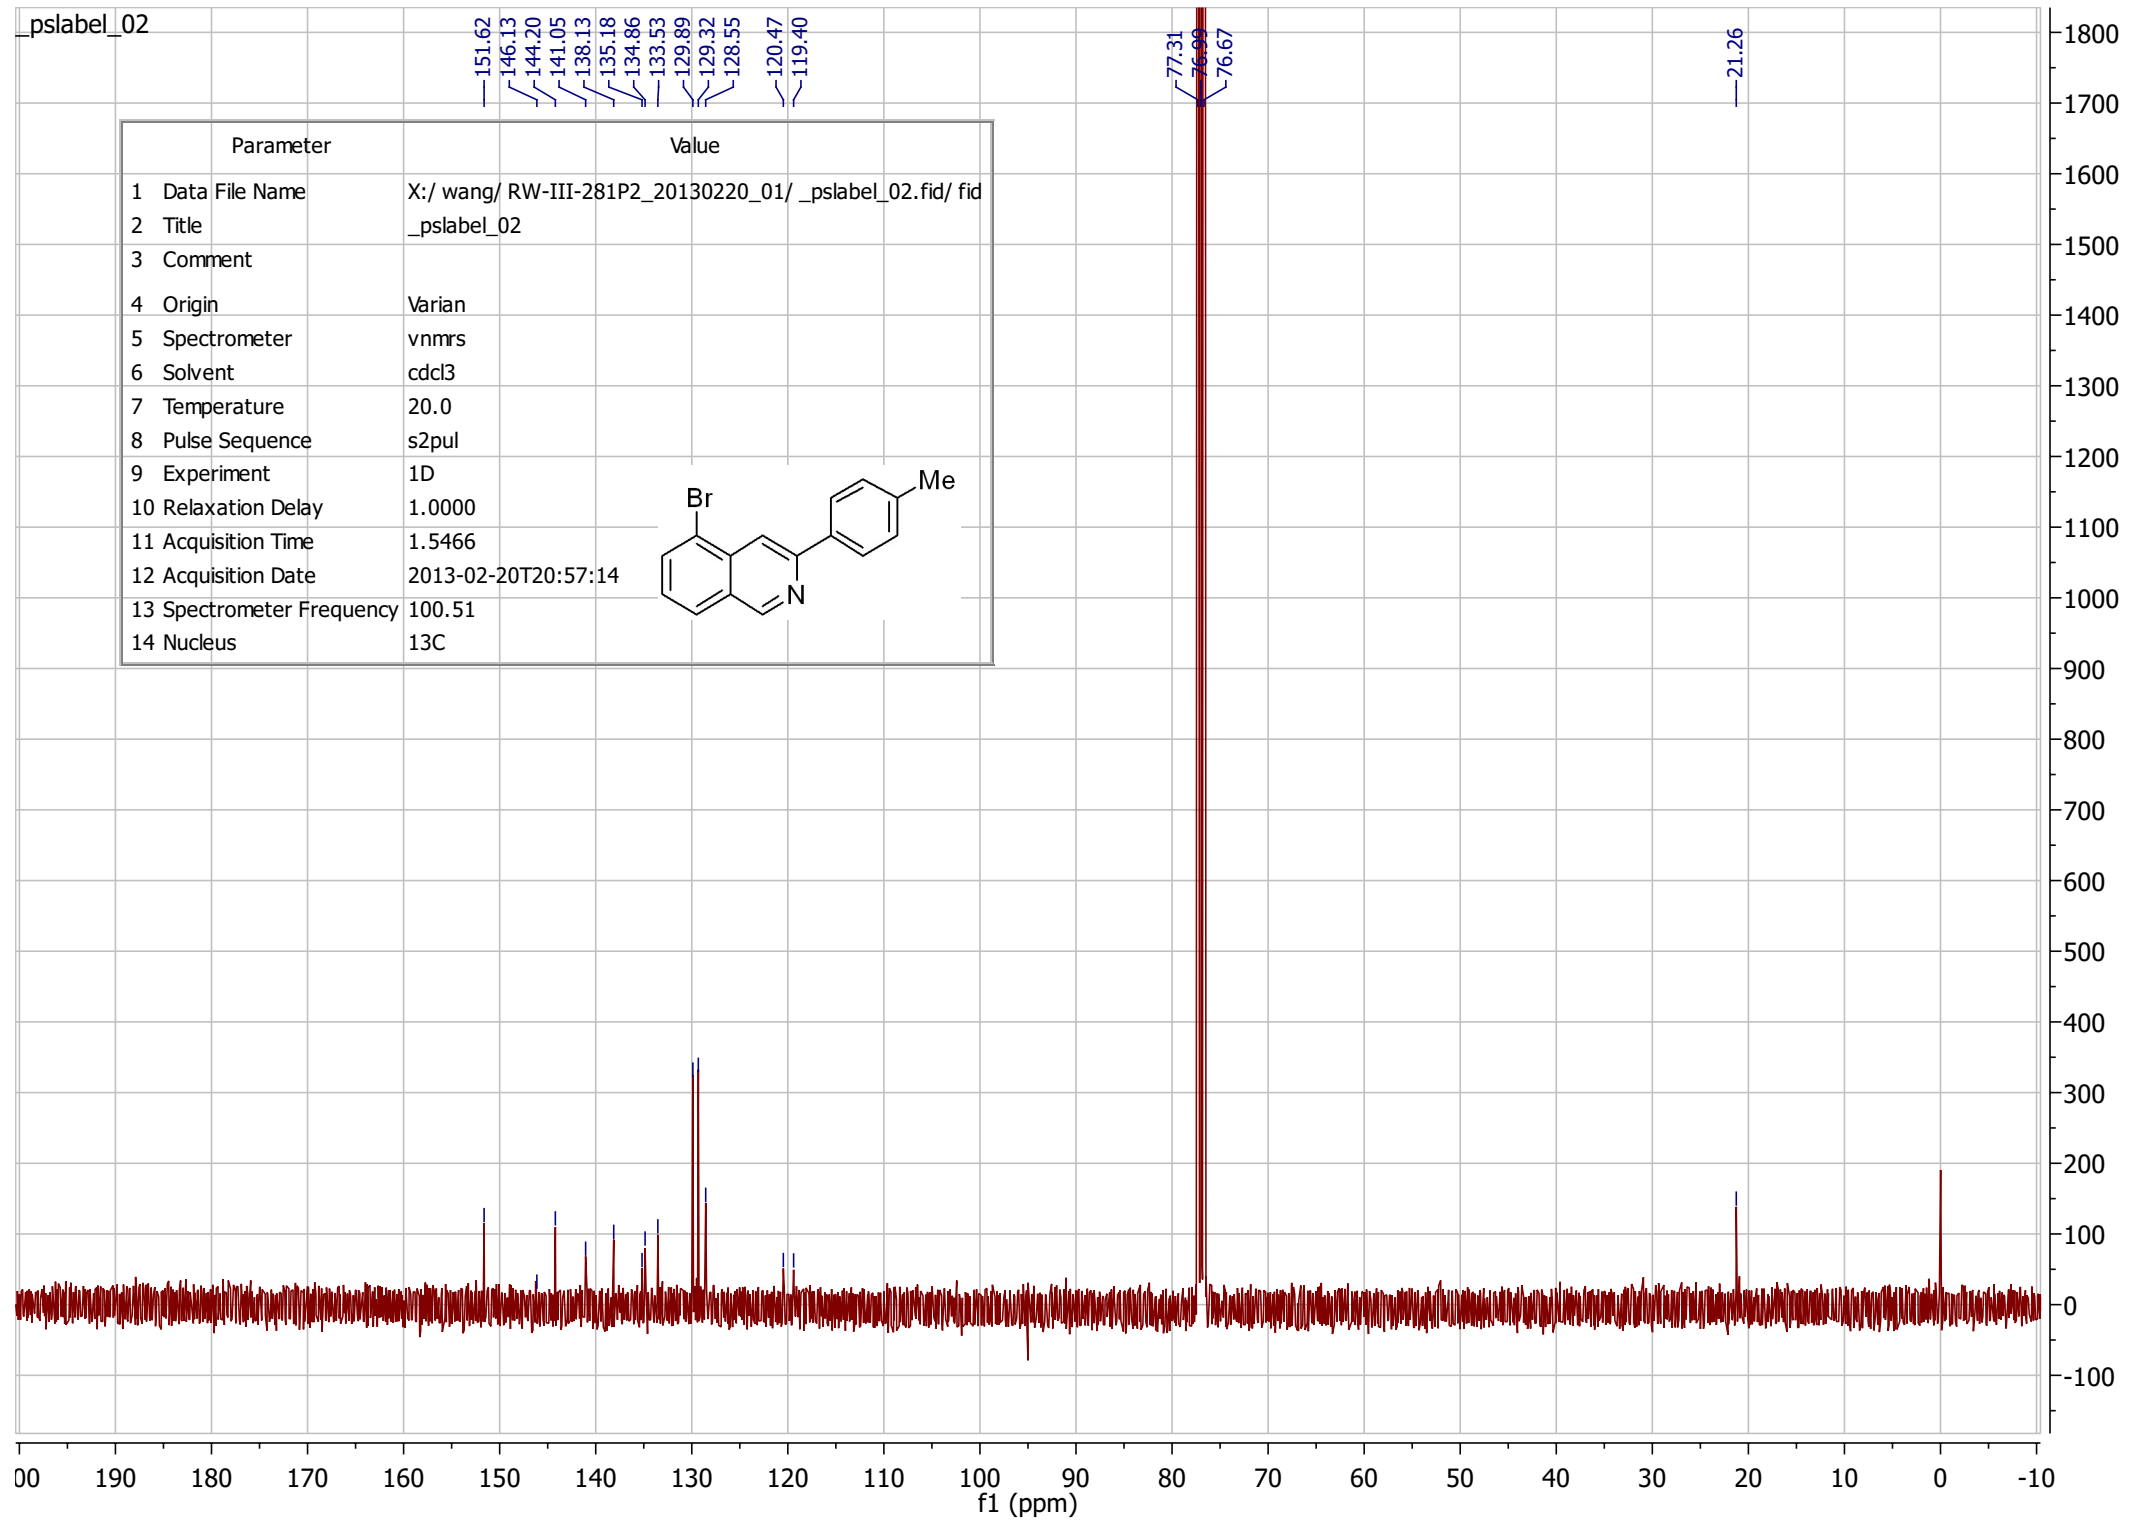

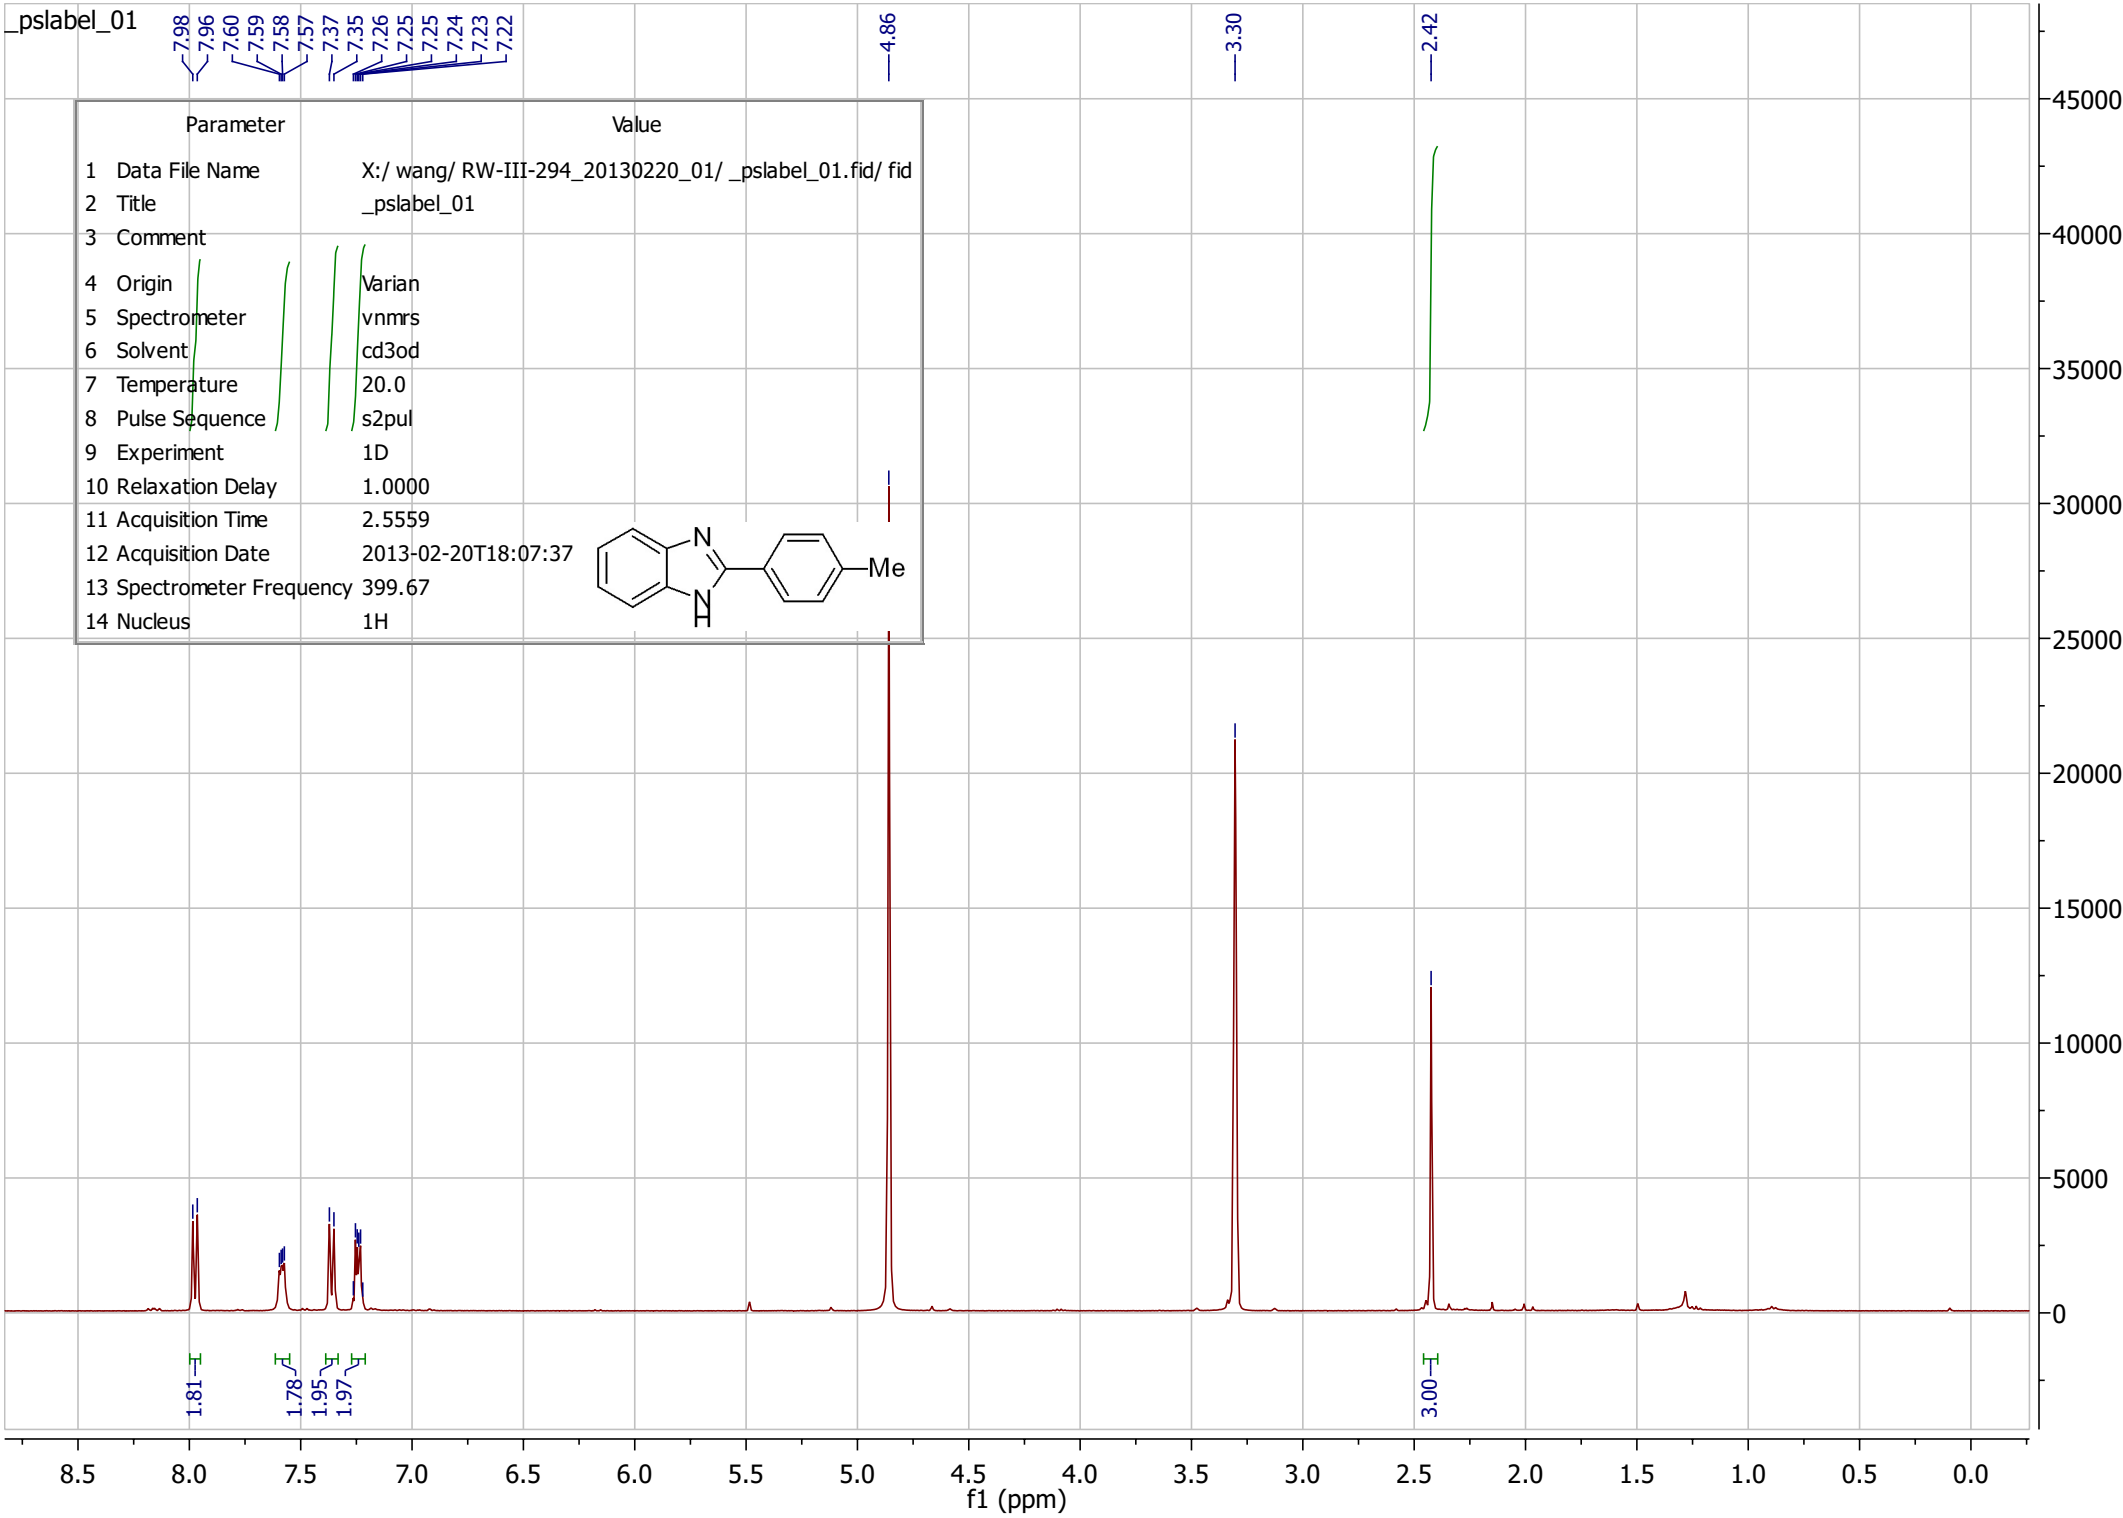

\_pslabel\_01

156.07

144.44

133.28

130.72

130.28

126.30

52.14

51.93

51.72

51.50

51.29

51.08

50.87

23.94

| Parameter                 | Value                                                  |
|---------------------------|--------------------------------------------------------|
| 1 Data File Name          | X:/ wang/ RW-III-294C_20130225_01/_pslabel_01.fid/ fid |
| 2 Title                   | _pslabel_01                                            |
| 3 Comment                 |                                                        |
| 4 Origin                  | Varian                                                 |
| 5 Spectrometer            | vnmrs                                                  |
| 6 Solvent                 | cdcl3                                                  |
| 7 Temperature             | 20.0                                                   |
| 8 Pulse Sequence          | s2pul                                                  |
| 9 Experiment              | 1D                                                     |
| 10 Relaxation Delay       | 1.0000                                                 |
| 11 Acquisition Time       | 1.5466                                                 |
| 12 Acquisition Date       | 2013-02-25T04:28:11                                    |
| 13 Spectrometer Frequency | 100.51                                                 |
| 14 Nucleus                | 13C                                                    |

Cc1ccc(cc1)/N=C2C=CC=CC2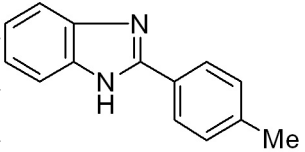

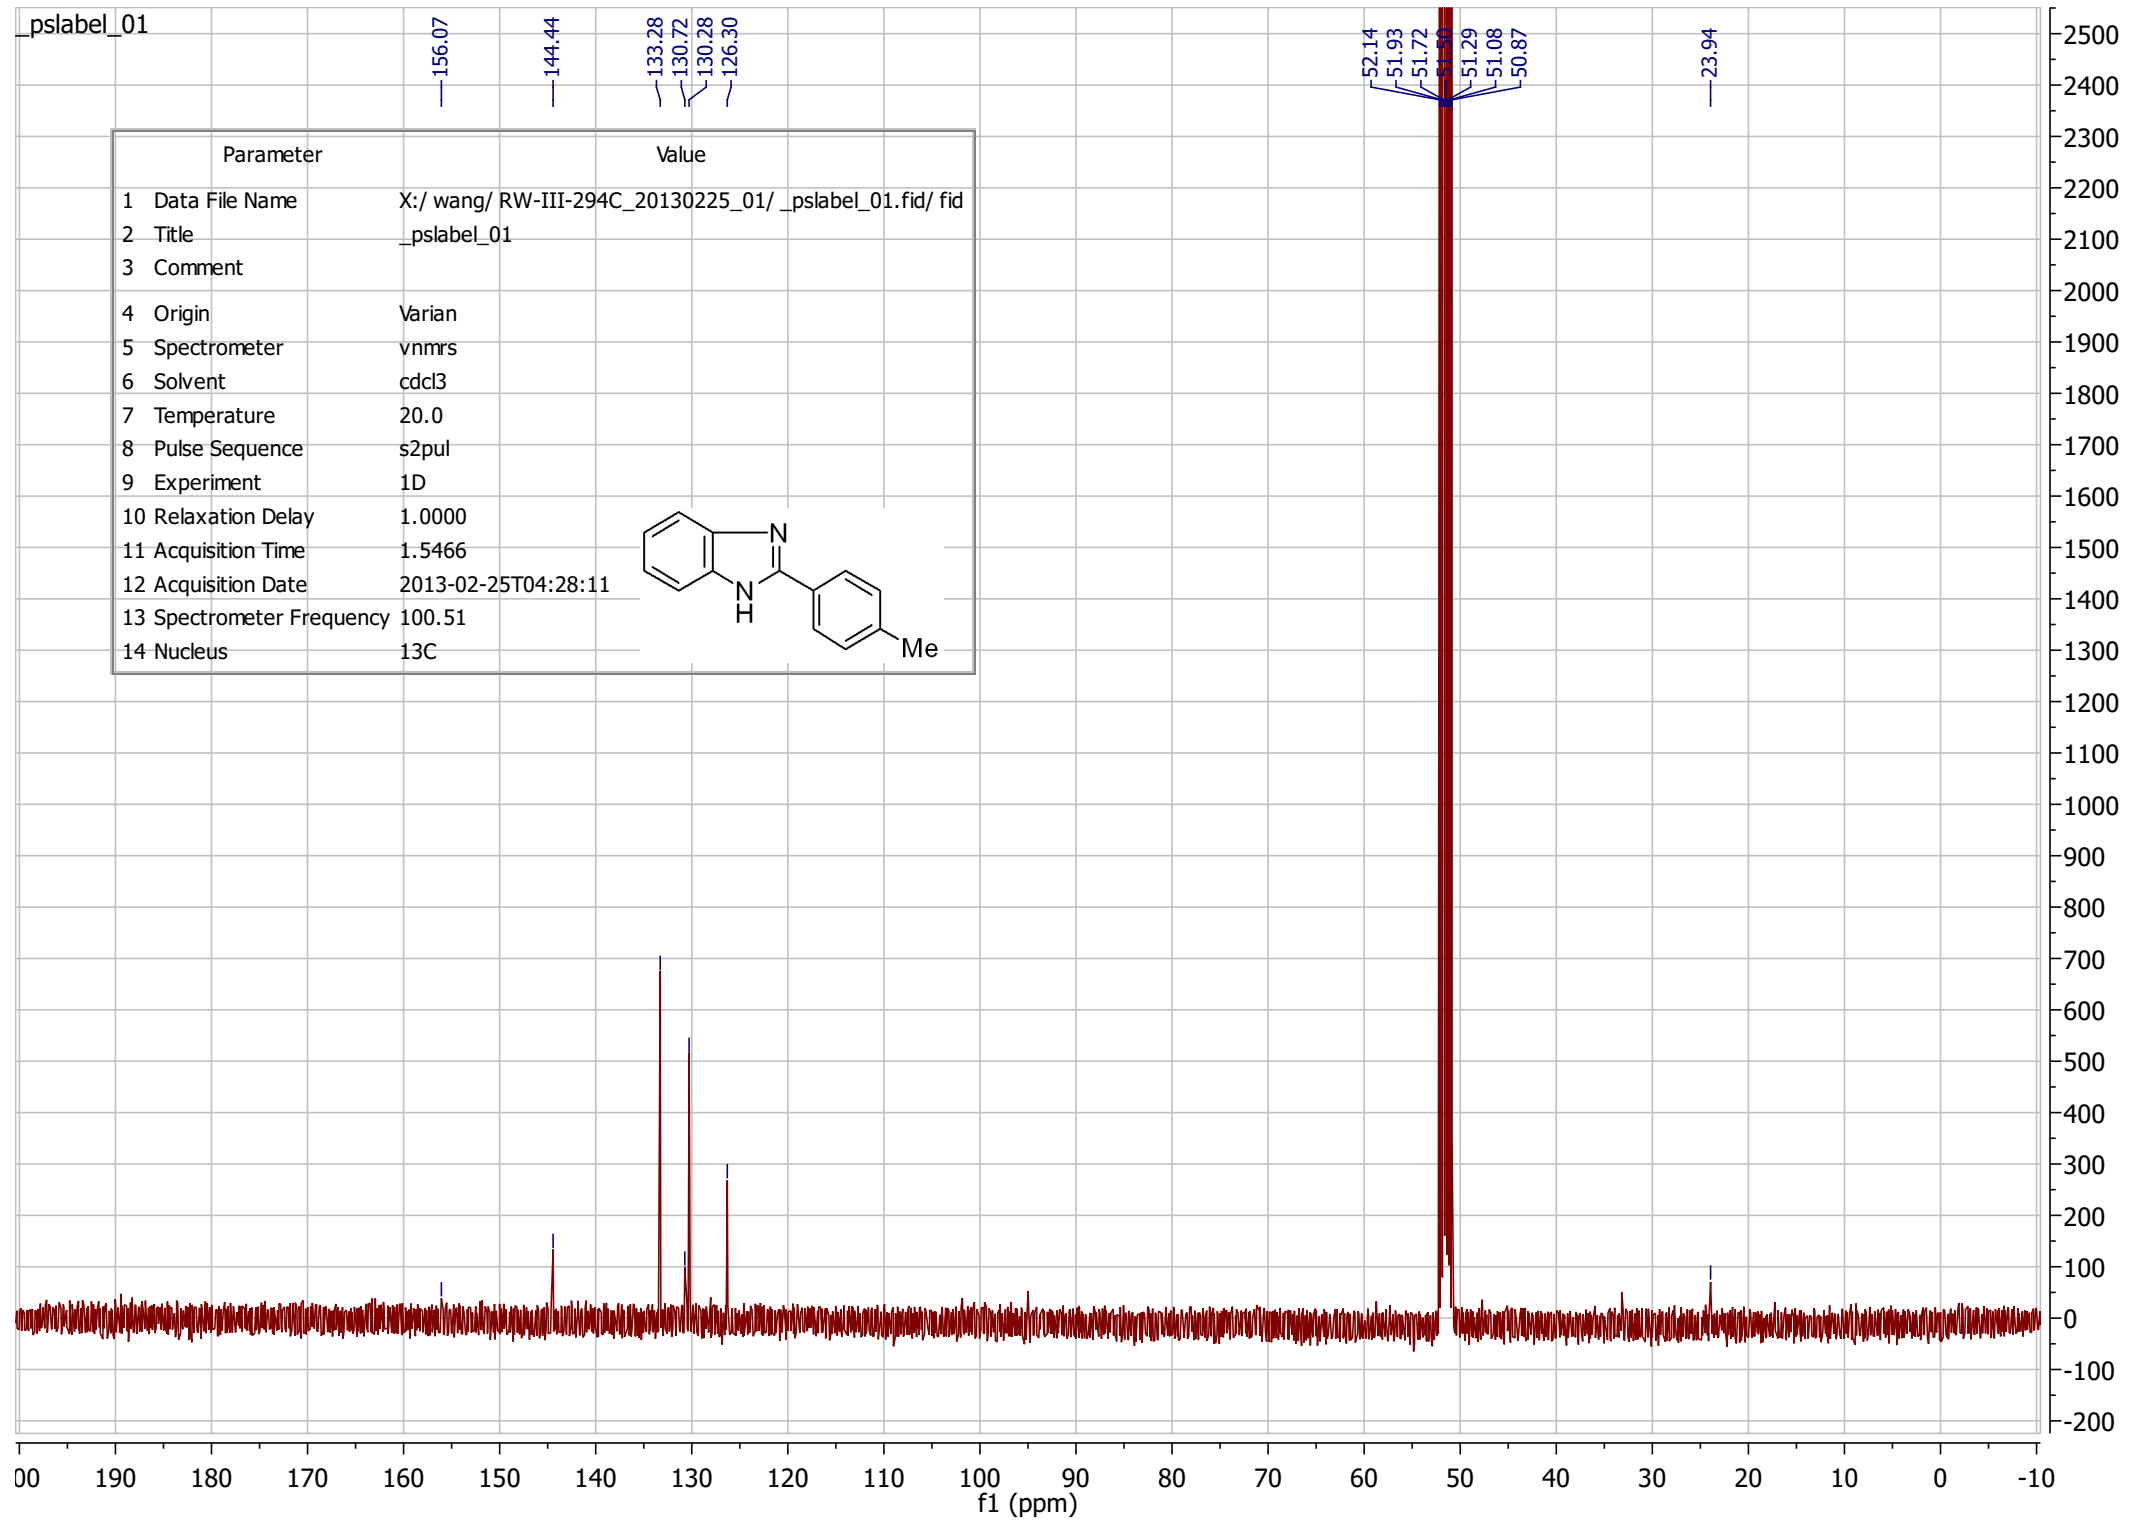

7.48  
7.42  
7.42  
7.40  
7.40  
7.34  
7.32  
7.26

| Parameter                 | Value                 |
|---------------------------|-----------------------|
| 1 Data File Name          | Z:/ wang/ RW-III-280H |
| 2 Title                   |                       |
| 3 Origin                  | vnMrs                 |
| 4 Owner                   |                       |
| 5 Solvent                 | cdcl3                 |
| 6 Pulse Sequence          | s2pul                 |
| 7 Acquisition Date        | 2013-02-23T00:13:49   |
| 8 Modification Date       |                       |
| 9 Temperature             | 20.0                  |
| 10 Number of Scans        | 40                    |
| 11 Spectrometer Frequency | 399.67                |
| 12 Spectral Width         | 6410.3                |
| 13 Lowest Frequency       | -807.1                |
| 14 Nucleus                | 1H                    |
| 15 Acquired Size          | 16384                 |
| 16 Spectral Size          | 32768                 |

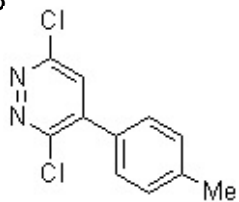

2.45

1.55

-0.00

0.86  
1.90  
1.94

3.00

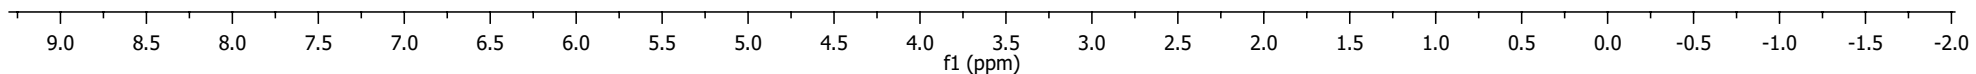

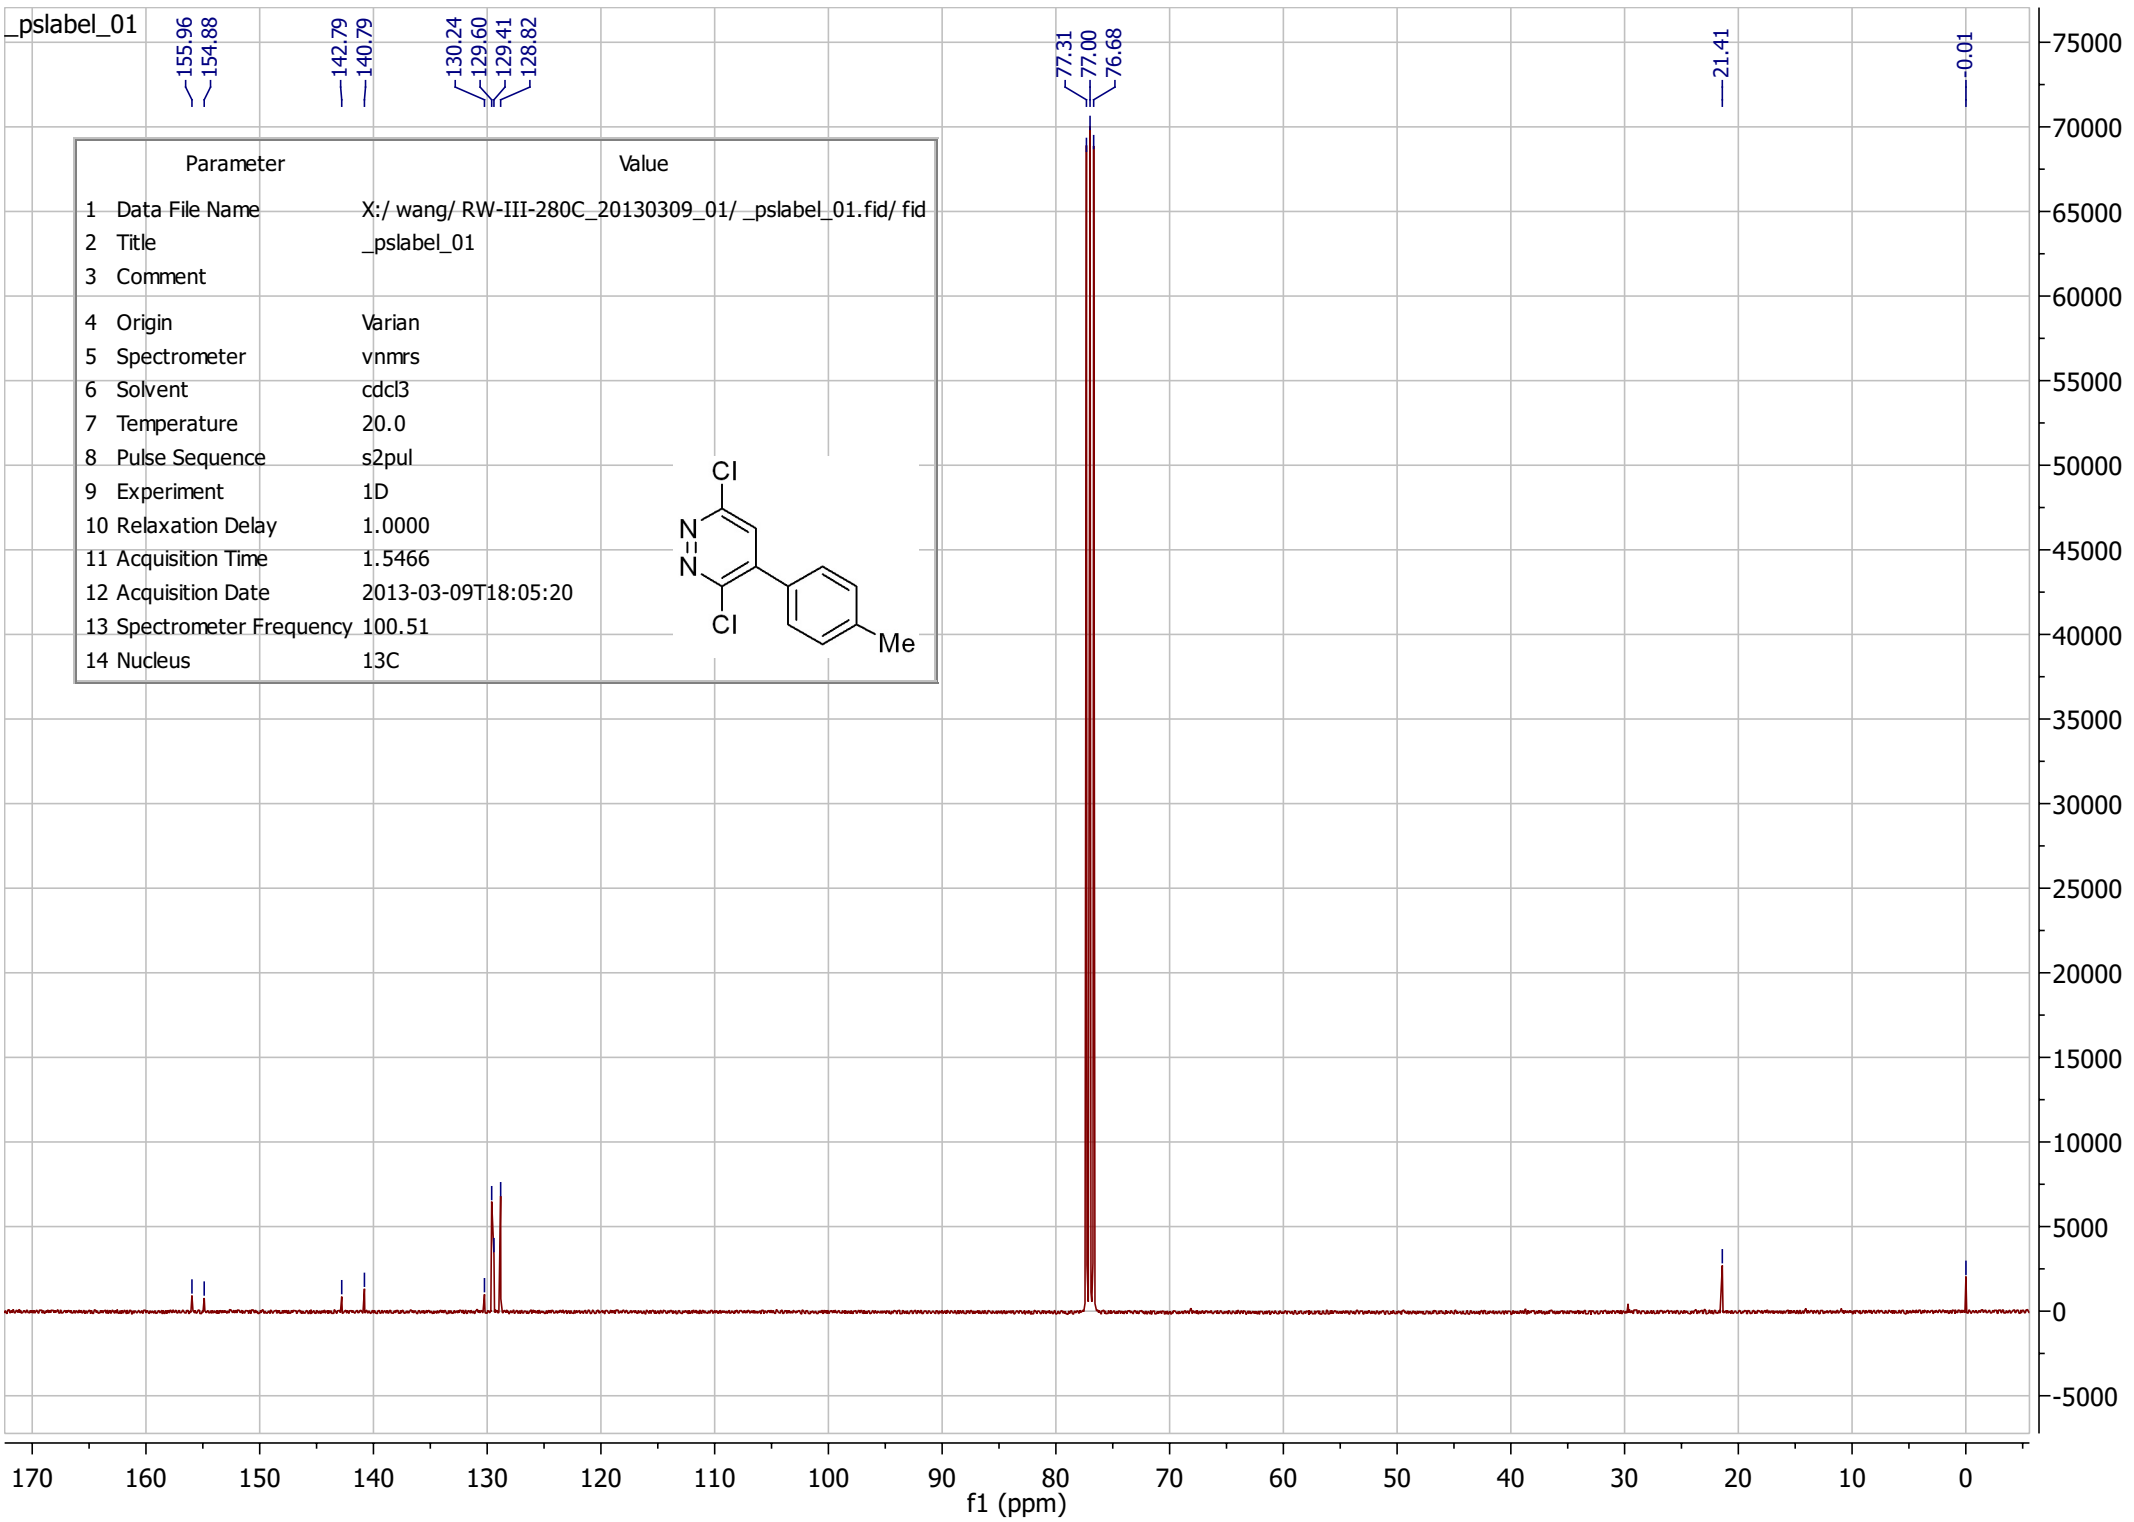

| Parameter                 | Value                                                  |
|---------------------------|--------------------------------------------------------|
| 1 Data File Name          | X:/ wang/ RW-III-280C_20130309_01/_pslabel_01.fid/ fid |
| 2 Title                   | _pslabel_01                                            |
| 3 Comment                 |                                                        |
| 4 Origin                  | Varian                                                 |
| 5 Spectrometer            | vnmrs                                                  |
| 6 Solvent                 | cdcl3                                                  |
| 7 Temperature             | 20.0                                                   |
| 8 Pulse Sequence          | s2pul                                                  |
| 9 Experiment              | 1D                                                     |
| 10 Relaxation Delay       | 1.0000                                                 |
| 11 Acquisition Time       | 1.5466                                                 |
| 12 Acquisition Date       | 2013-03-09T18:05:20                                    |
| 13 Spectrometer Frequency | 100.51                                                 |
| 14 Nucleus                | 13C                                                    |

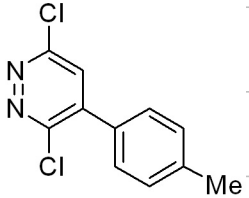

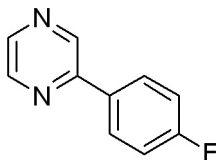

| Parameter                 | Value                                                  |
|---------------------------|--------------------------------------------------------|
| 1 Data File Name          | W:/ wang/ RW-IV-53HF_20130411_01/ _pslabel_01.fid/ fid |
| 2 Title                   | _pslabel_01                                            |
| 3 Comment                 |                                                        |
| 4 Origin                  | Varian                                                 |
| 5 Owner                   |                                                        |
| 6 Site                    |                                                        |
| 7 Spectrometer            | vnmrs                                                  |
| 8 Author                  |                                                        |
| 9 Solvent                 | cdcl3                                                  |
| 10 Temperature            | 20.0                                                   |
| 11 Pulse Sequence         | s2pul                                                  |
| 12 Experiment             | 1D                                                     |
| 13 Number of Scans        | 34                                                     |
| 14 Receiver Gain          | 30                                                     |
| 15 Relaxation Delay       | 1.0000                                                 |
| 16 Pulse Width            | 0.0000                                                 |
| 17 Acquisition Time       | 2.5559                                                 |
| 18 Acquisition Date       | 2013-04-11T16:02:06                                    |
| 19 Modification Date      | 2013-04-11T15:04:12                                    |
| 20 Spectrometer Frequency | 399.67                                                 |
| 21 Spectral Width         | 6410.3                                                 |
| 22 Lowest Frequency       | -802.3                                                 |
| 23 Nucleus                | 1H                                                     |
| 24 Acquired Size          | 16384                                                  |
| 25 Spectral Size          | 32768                                                  |

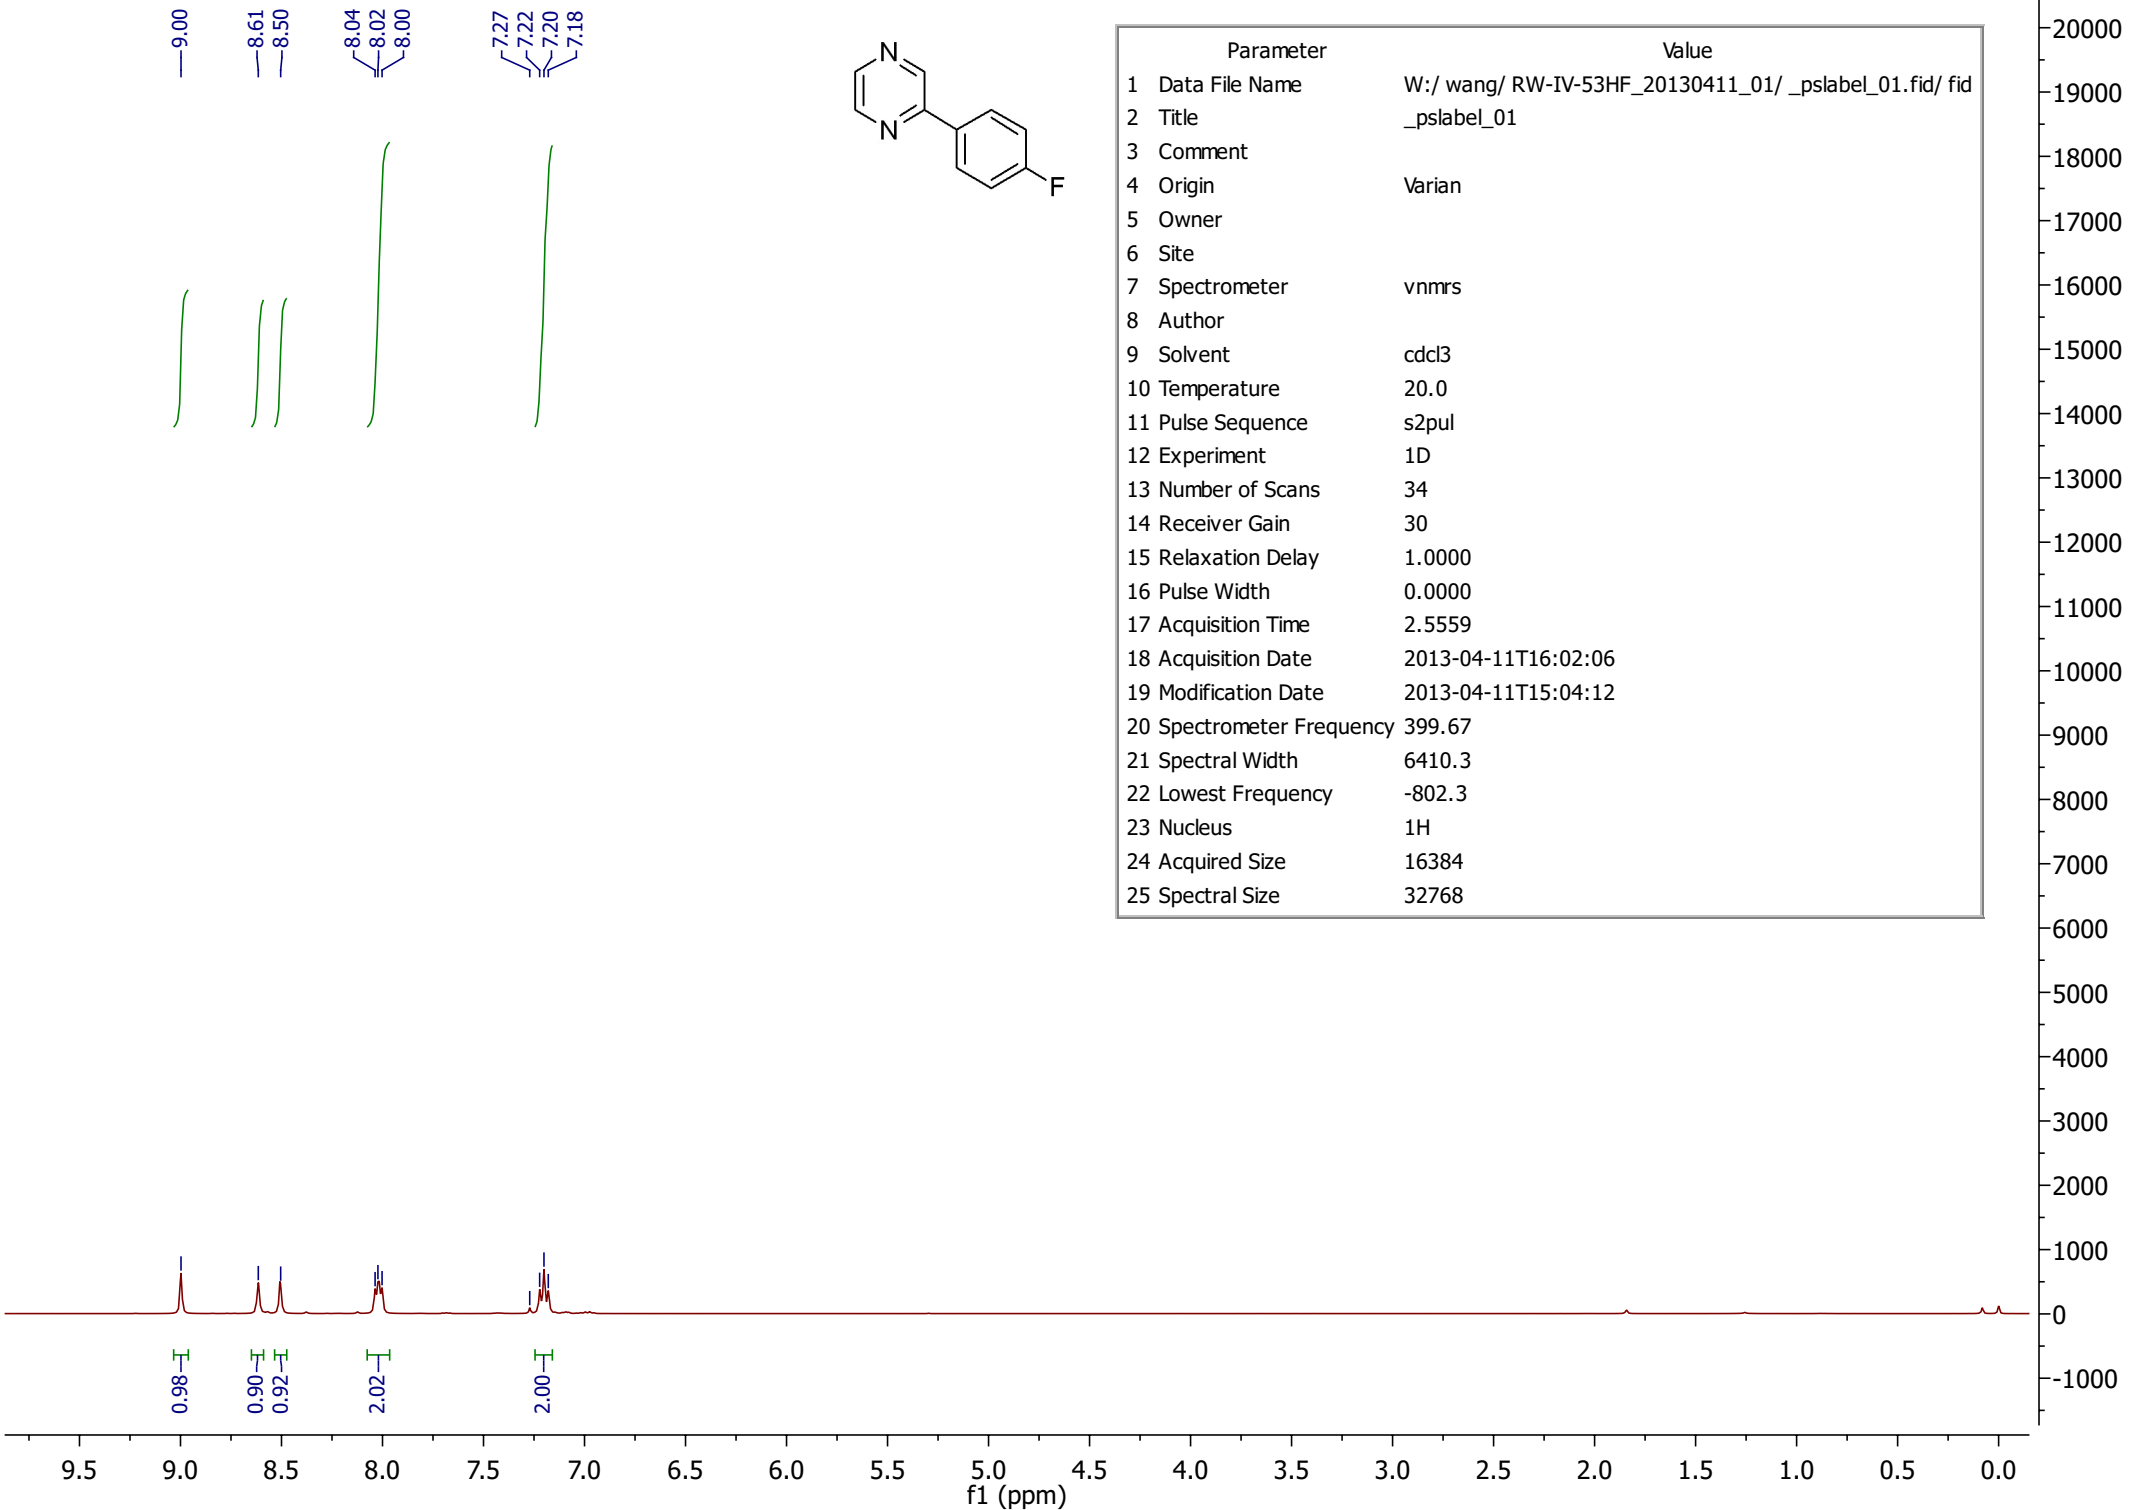

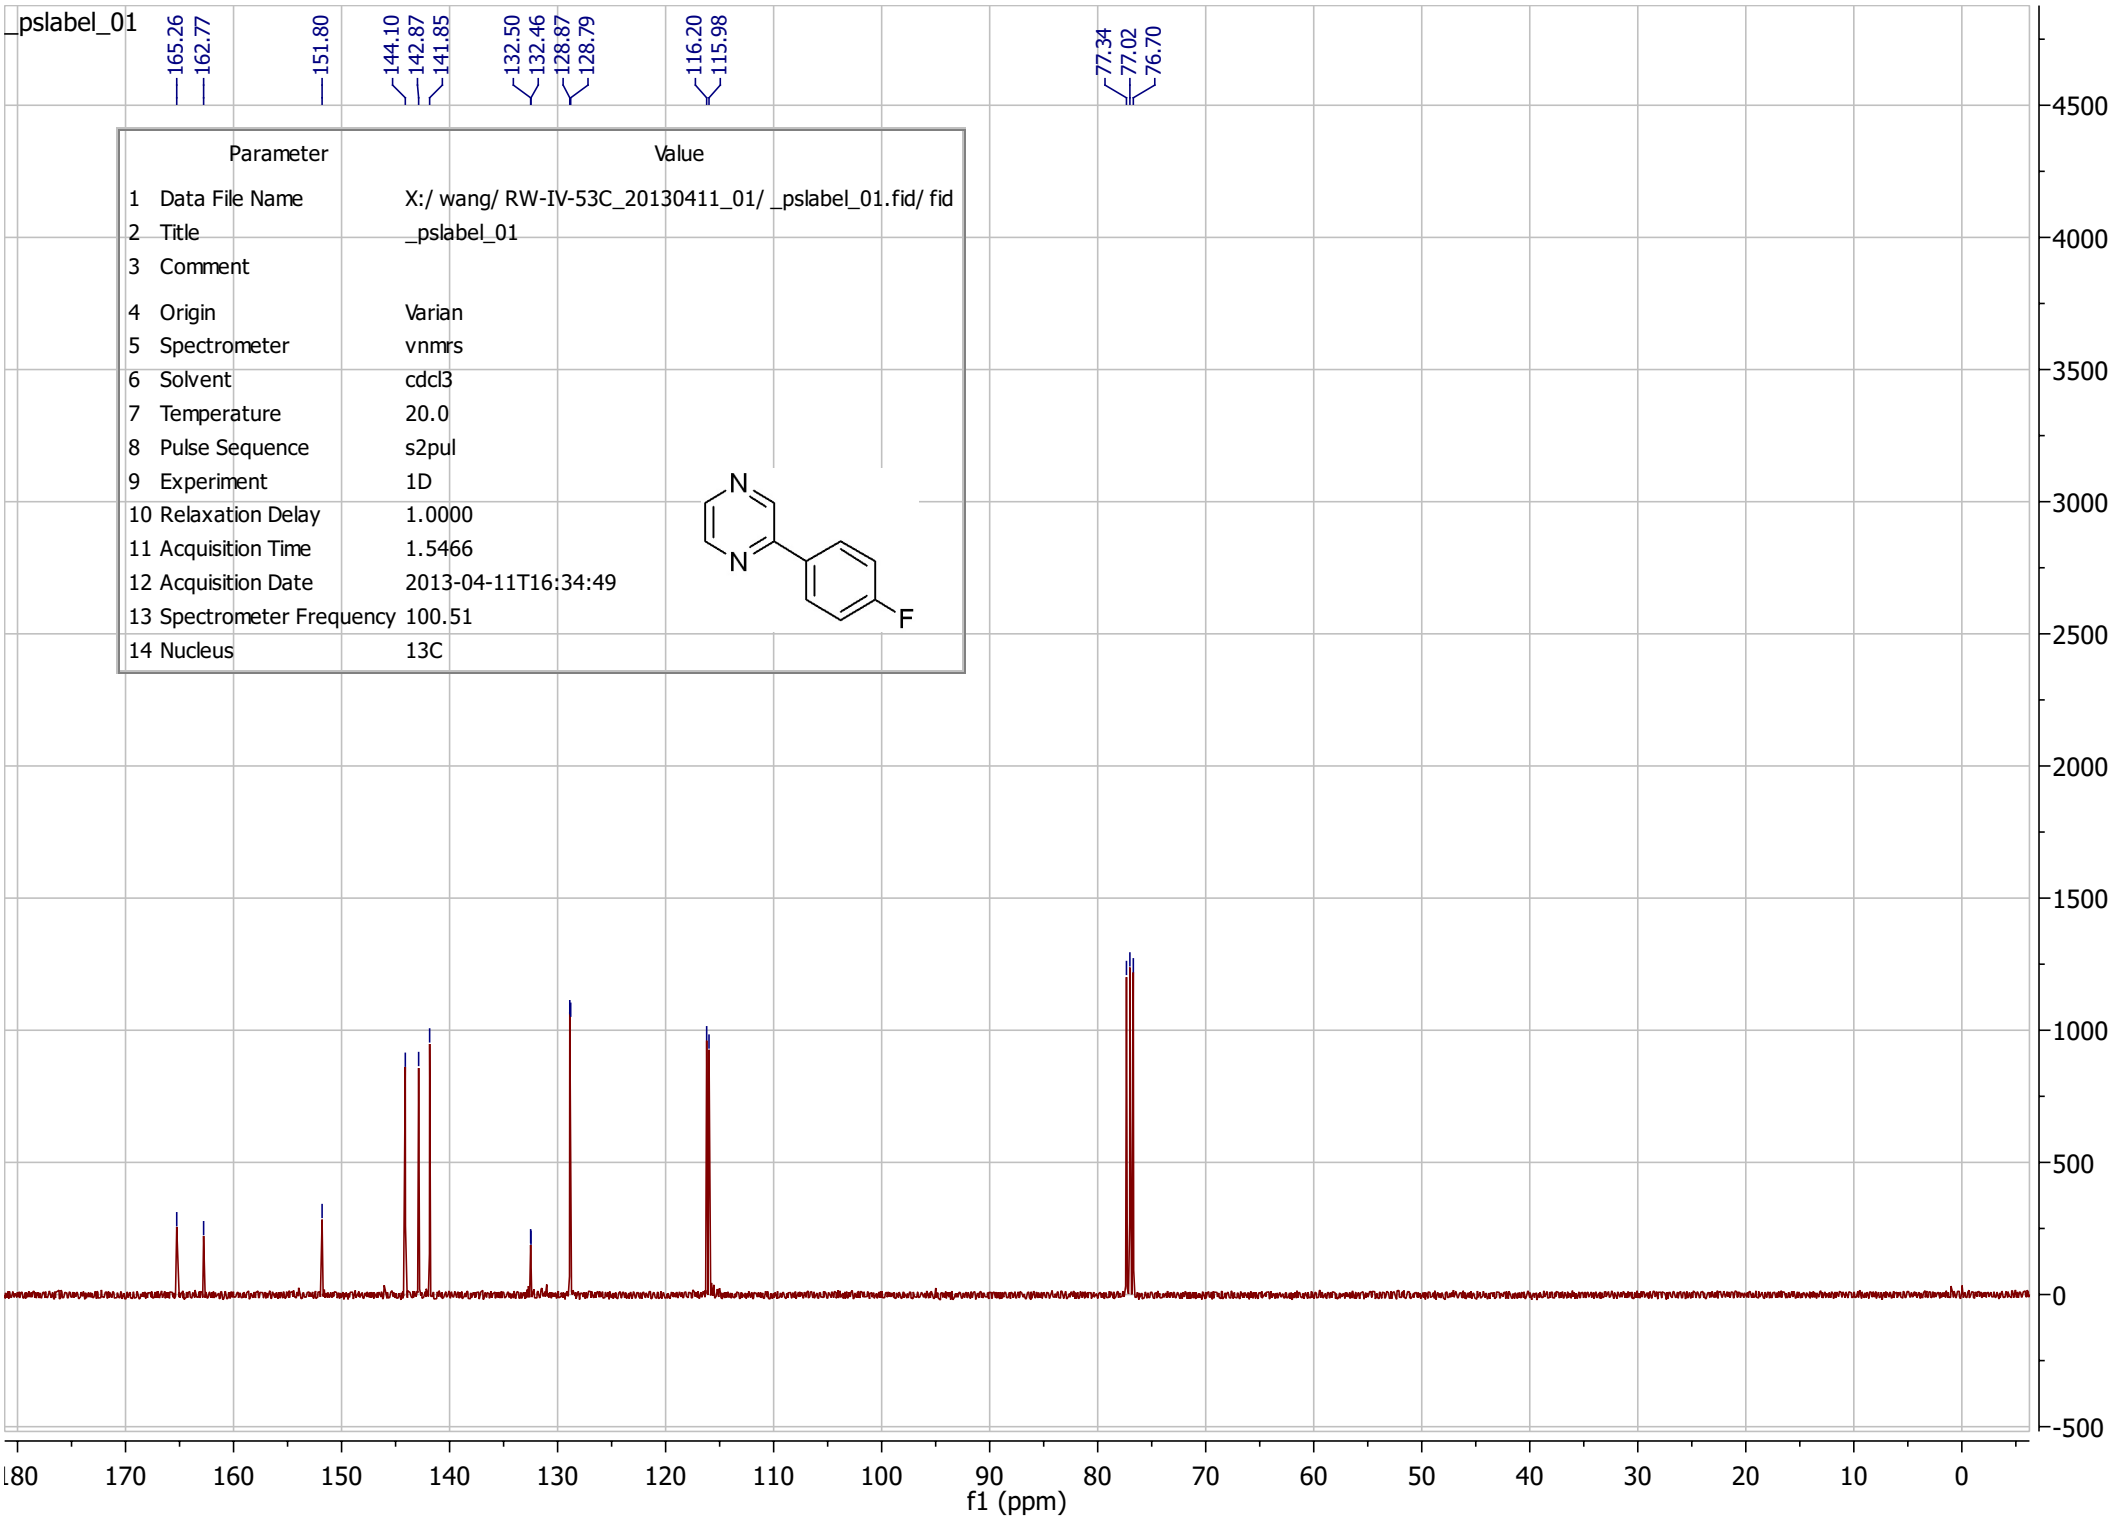

| Parameter                 | Value                                                  |
|---------------------------|--------------------------------------------------------|
| 1 Data File Name          | W:/ wang/ RW-IV-53HF_20130411_01/ _pslabel_02.fid/ fid |
| 2 Title                   | _pslabel_02                                            |
| 3 Comment                 |                                                        |
| 4 Origin                  | Varian                                                 |
| 5 Owner                   |                                                        |
| 6 Site                    |                                                        |
| 7 Spectrometer            | vnmrs                                                  |
| 8 Author                  |                                                        |
| 9 Solvent                 | cdcl3                                                  |
| 10 Temperature            | 20.0                                                   |
| 11 Pulse Sequence         | s2pul                                                  |
| 12 Experiment             | 1D                                                     |
| 13 Number of Scans        | 40                                                     |
| 14 Receiver Gain          | 58                                                     |
| 15 Relaxation Delay       | 1.0000                                                 |
| 16 Pulse Width            | 0.0000                                                 |
| 17 Acquisition Time       | 0.7340                                                 |
| 18 Acquisition Date       | 2013-04-11T16:05:47                                    |
| 19 Modification Date      | 2013-04-11T15:06:59                                    |
| 20 Spectrometer Frequency | 376.03                                                 |
| 21 Spectral Width         | 89285.7                                                |
| 22 Lowest Frequency       | -76608.5                                               |
| 23 Nucleus                | 19F                                                    |
| 24 Acquired Size          | 65536                                                  |
| 25 Spectral Size          | 131072                                                 |

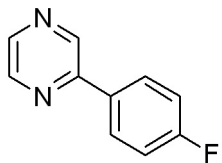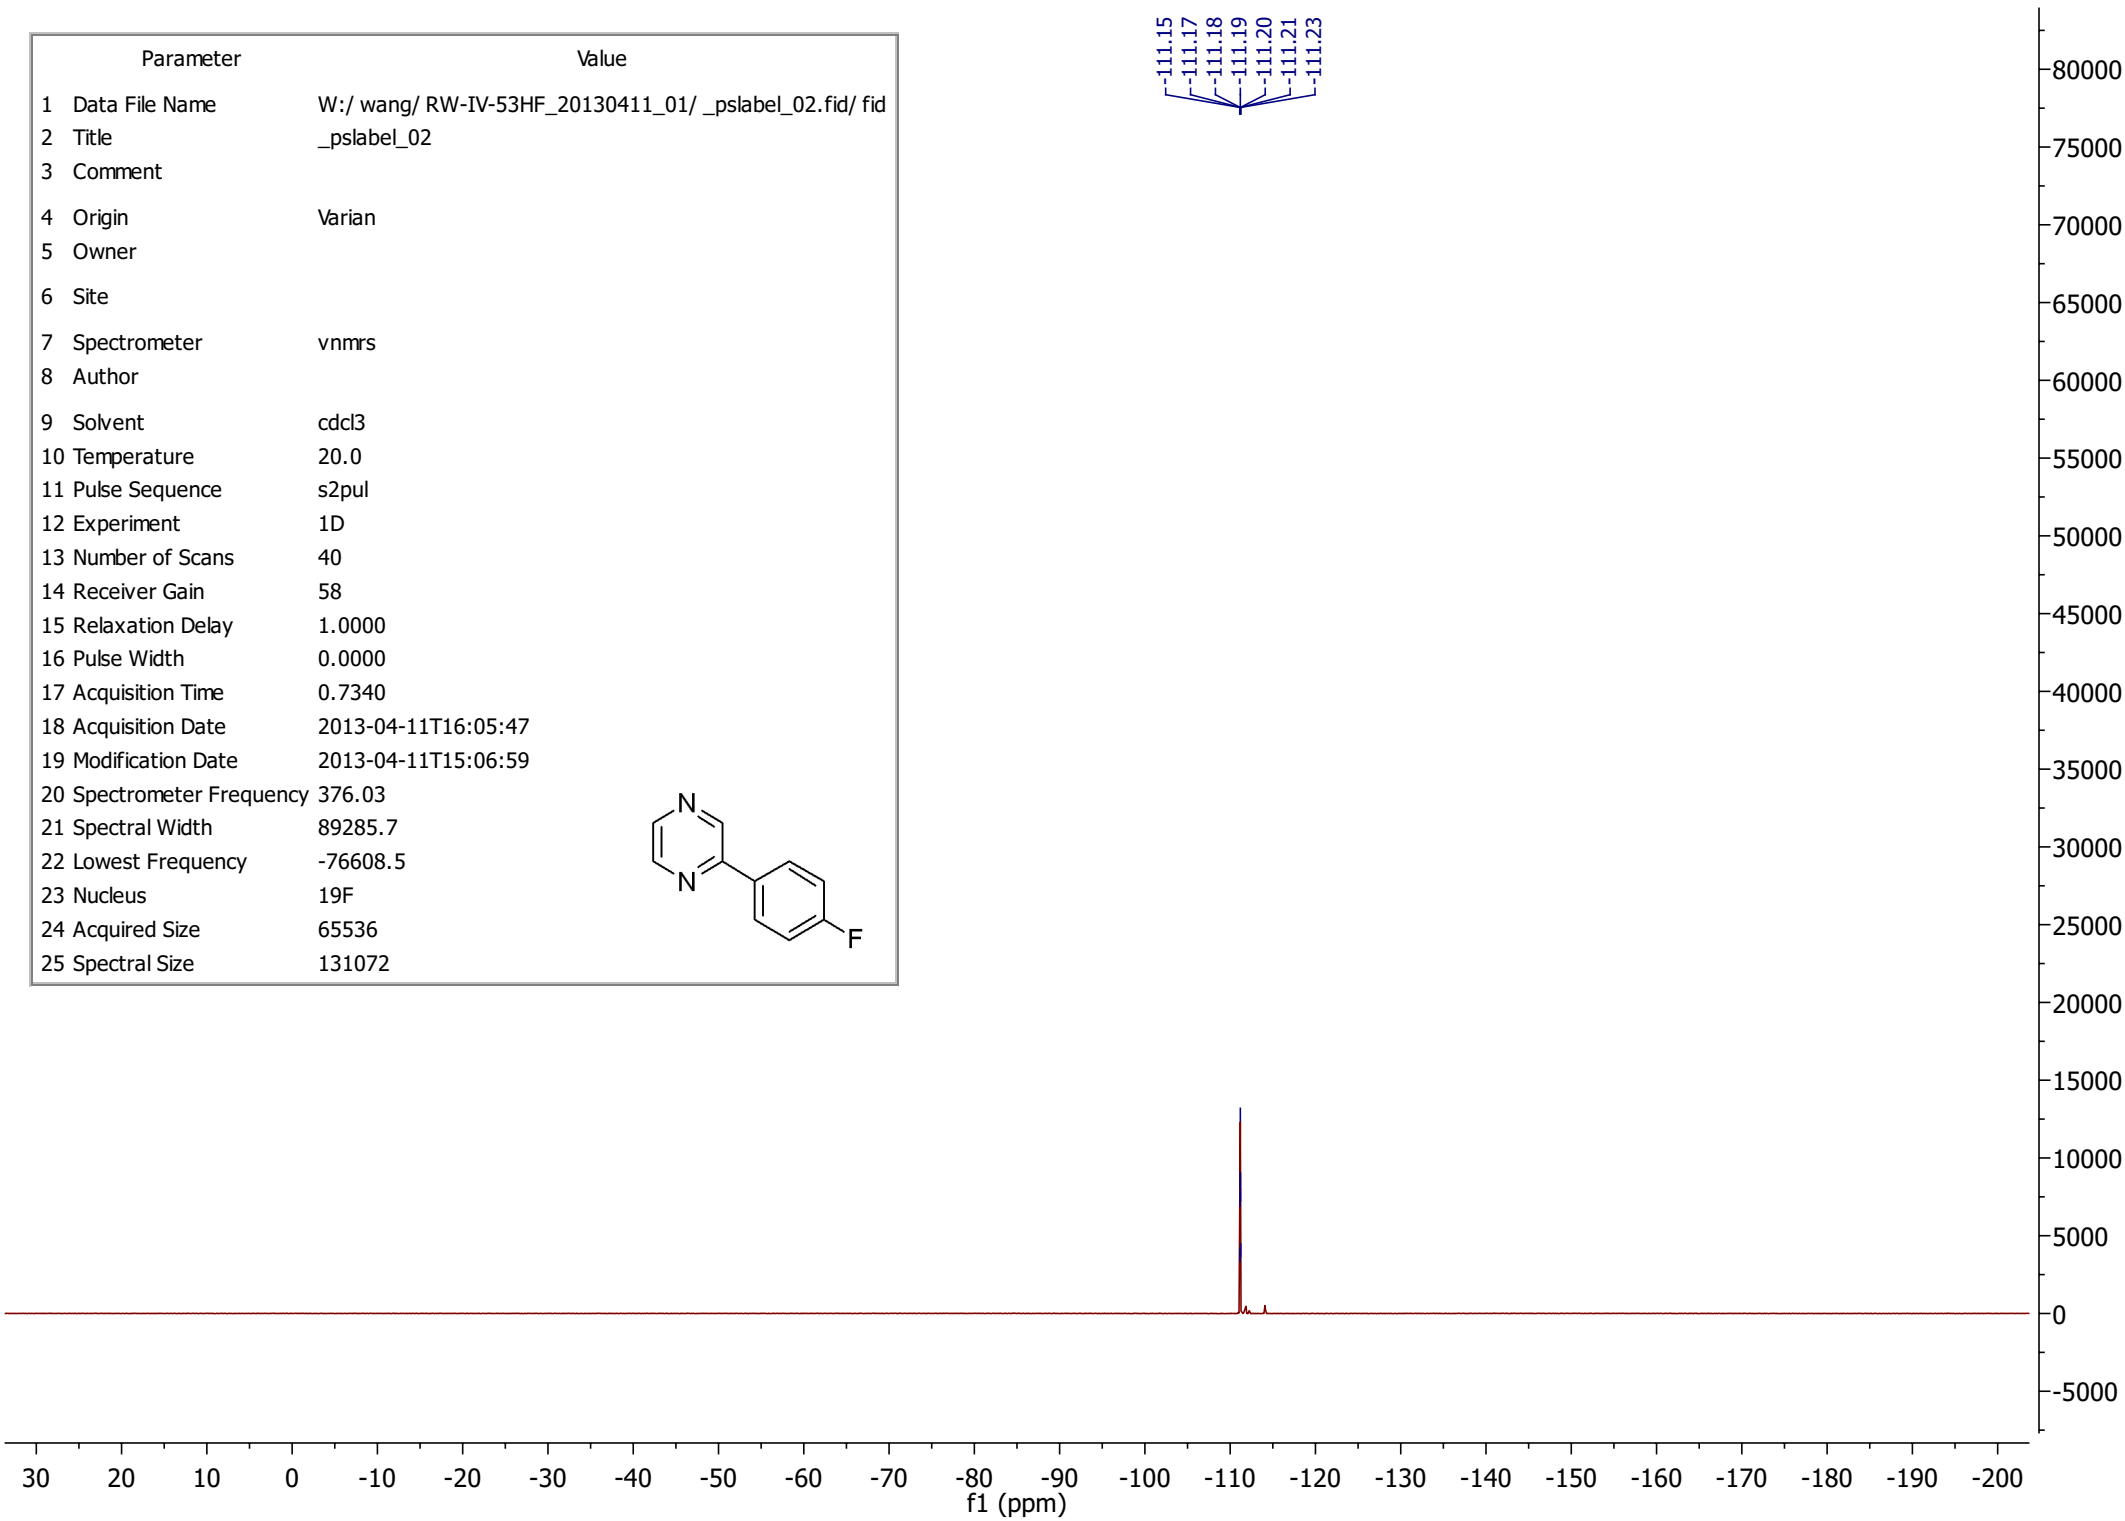



7.40  
7.38  
7.27  
7.25  
6.87  
6.85  
6.82  
6.80

2.40

| Parameter                 | Value                 |
|---------------------------|-----------------------|
| 1 Data File Name          | Z:/ wang/ RW-III-251H |
| 2 Title                   |                       |
| 3 Origin                  | vnmrs                 |
| 4 Owner                   |                       |
| 5 Solvent                 | cdcl3                 |
| 6 Pulse Sequence          | s2pul                 |
| 7 Acquisition Date        | 2013-01-19T14:49:52   |
| 8 Modification Date       |                       |
| 9 Temperature             | 20.0                  |
| 10 Number of Scans        | 33                    |
| 11 Spectrometer Frequency | 399.67                |
| 12 Spectral Width         | 6410.3                |
| 13 Lowest Frequency       | -807.1                |
| 14 Nucleus                | 1H                    |
| 15 Acquired Size          | 16384                 |
| 16 Spectral Size          | 32768                 |

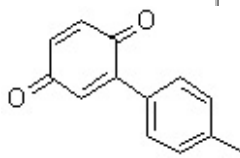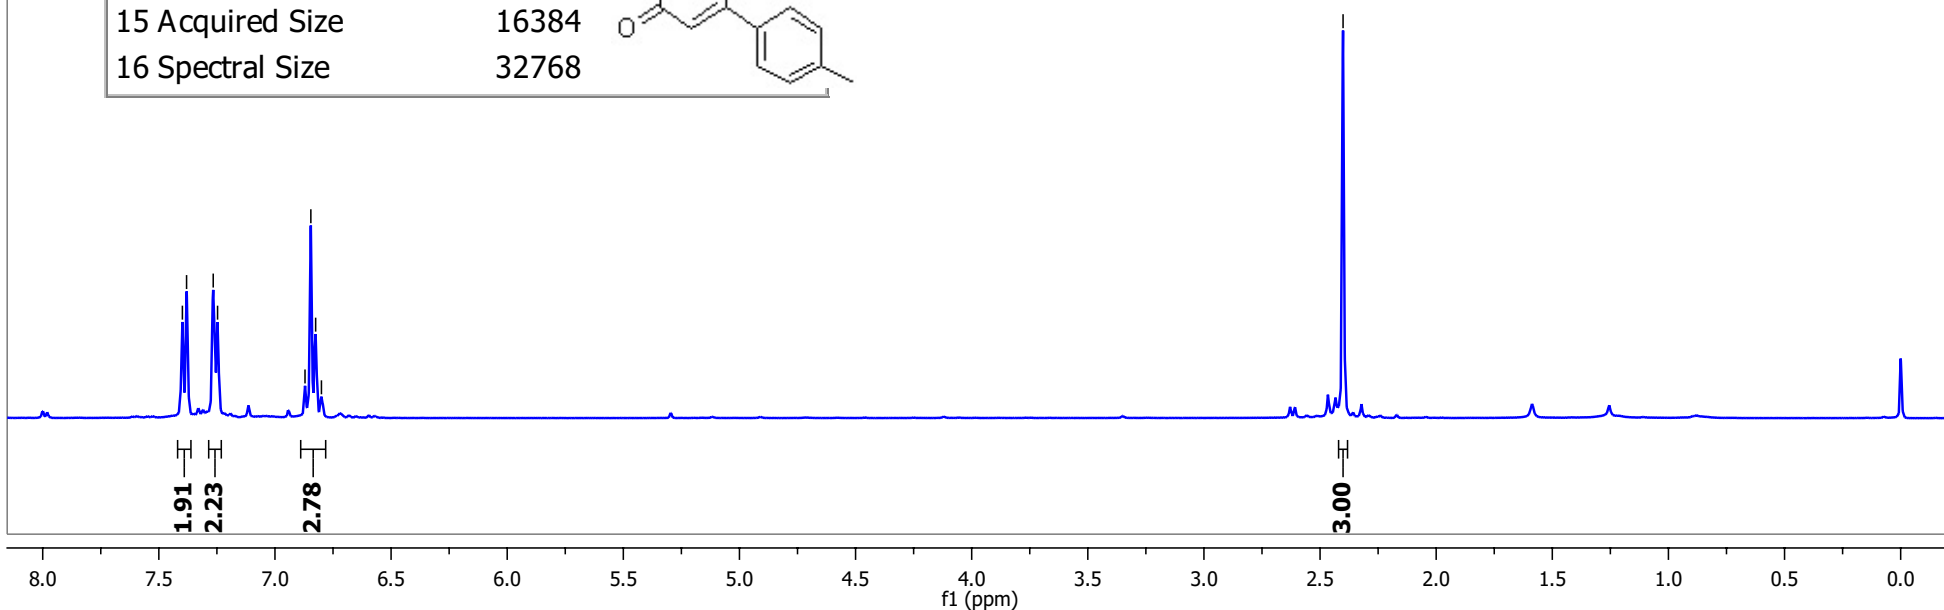

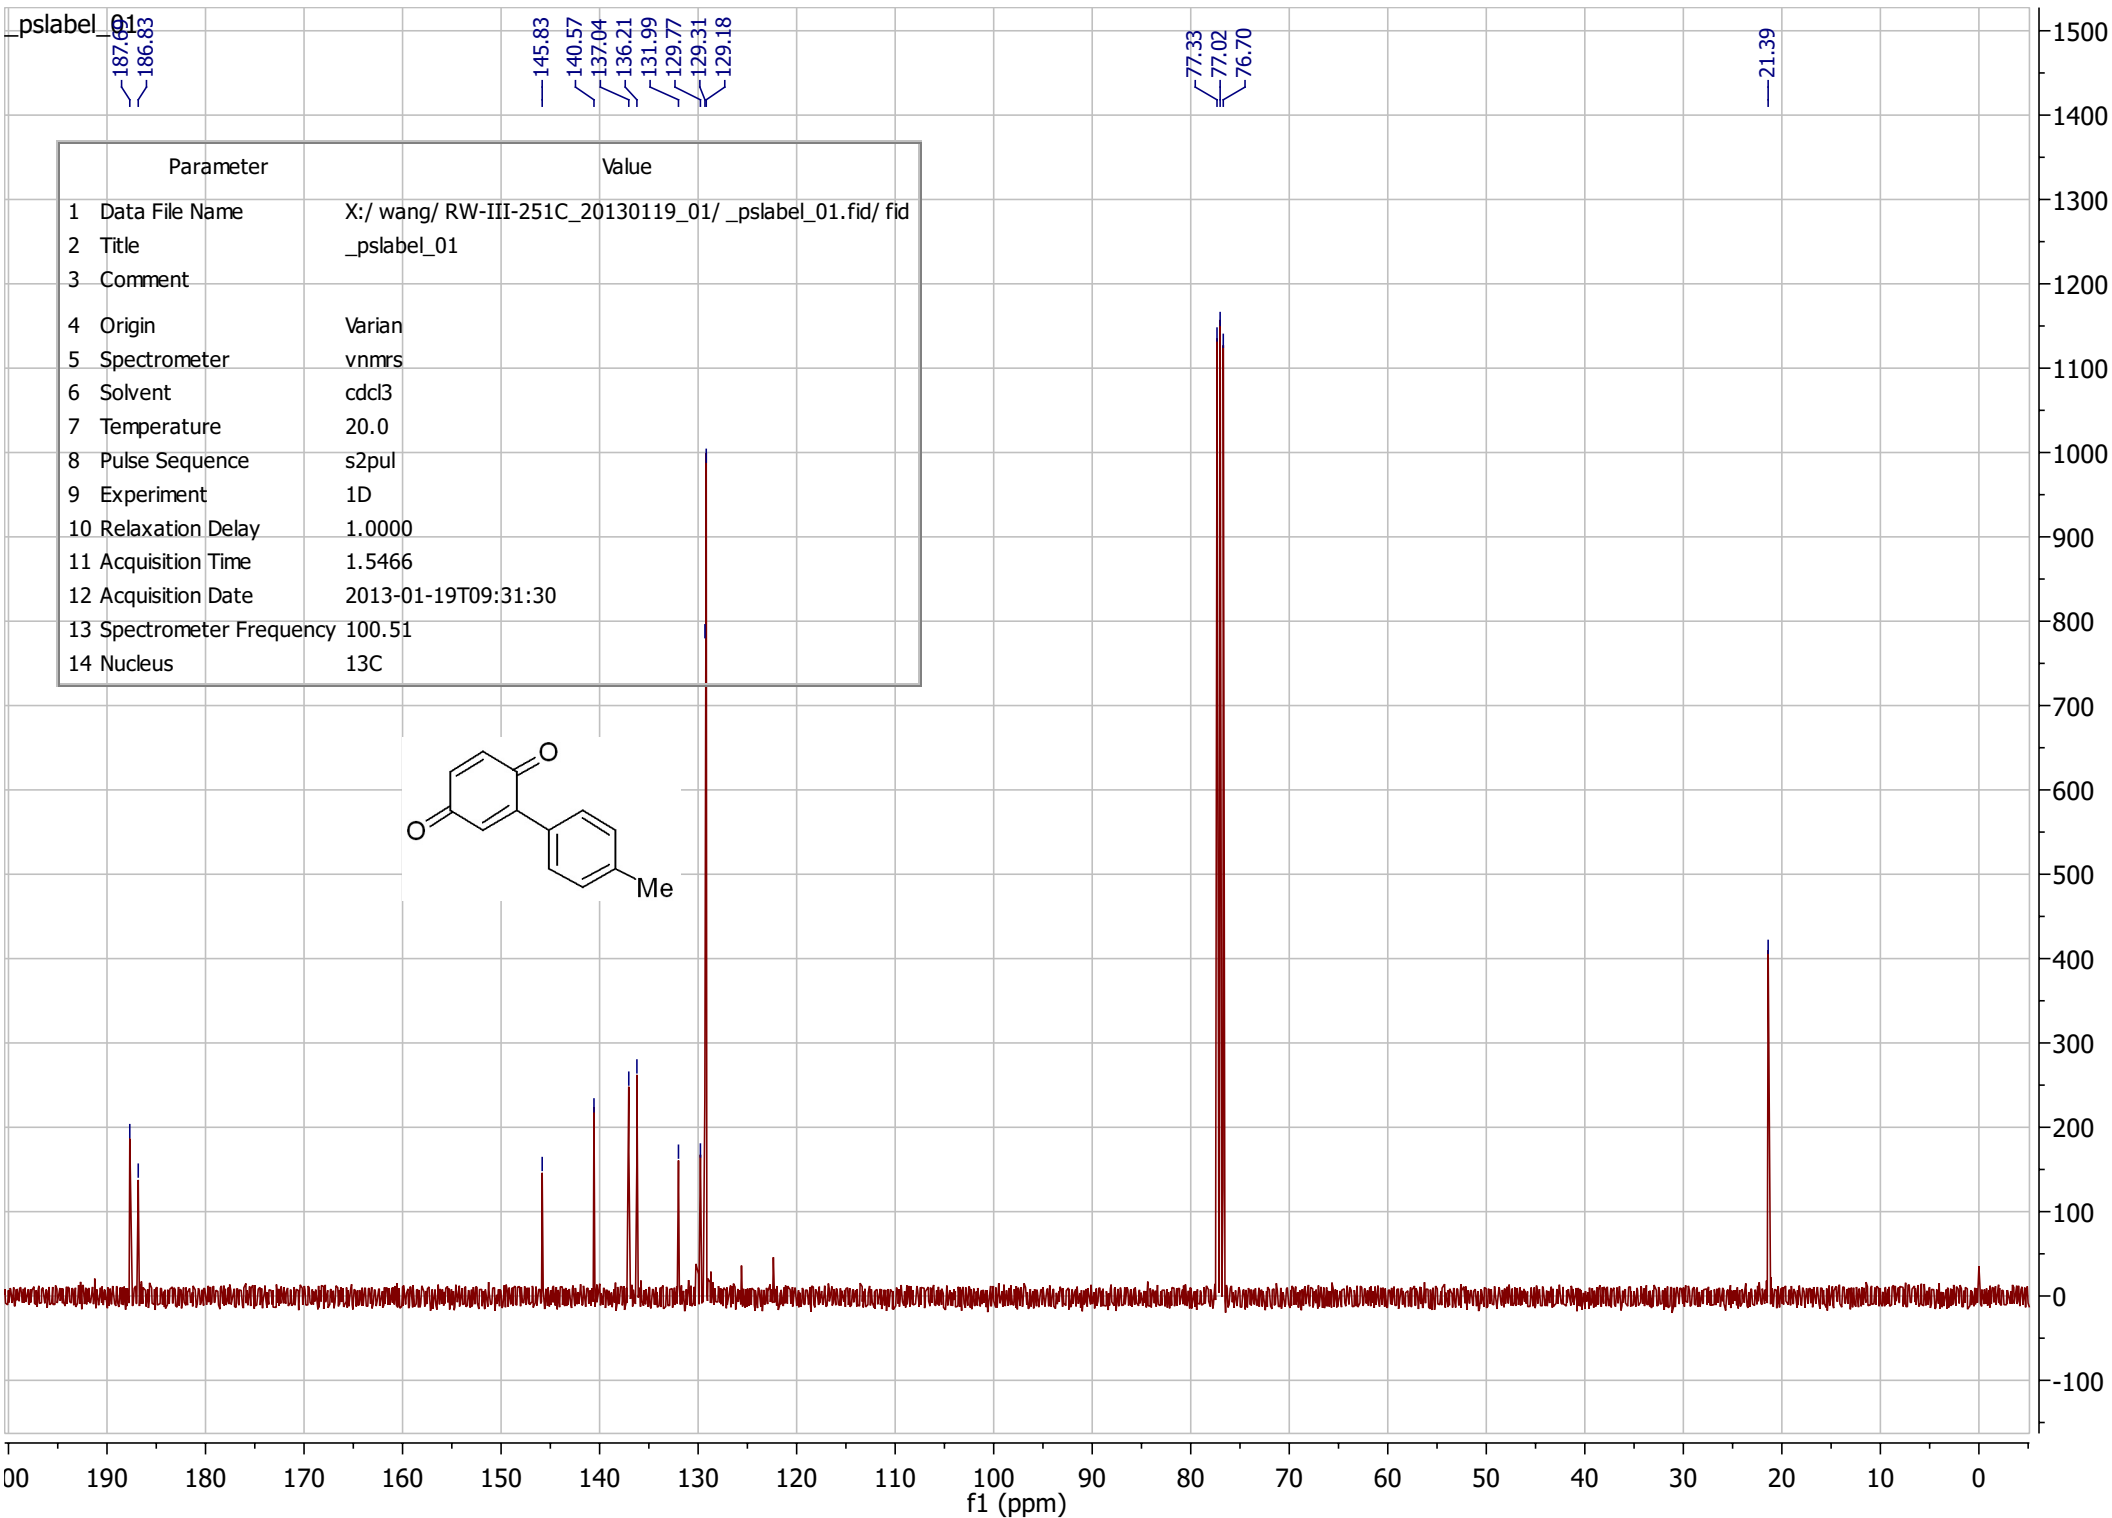

| Parameter                 | Value                                                   |
|---------------------------|---------------------------------------------------------|
| 1 Data File Name          | X:/ wang/ RW-III-251C_20130119_01/ _pslabel_01.fid/ fid |
| 2 Title                   | _pslabel_01                                             |
| 3 Comment                 |                                                         |
| 4 Origin                  | Varian                                                  |
| 5 Spectrometer            | vnmrs                                                   |
| 6 Solvent                 | cdcl3                                                   |
| 7 Temperature             | 20.0                                                    |
| 8 Pulse Sequence          | s2pul                                                   |
| 9 Experiment              | 1D                                                      |
| 10 Relaxation Delay       | 1.0000                                                  |
| 11 Acquisition Time       | 1.5466                                                  |
| 12 Acquisition Date       | 2013-01-19T09:31:30                                     |
| 13 Spectrometer Frequency | 100.51                                                  |
| 14 Nucleus                | 13C                                                     |

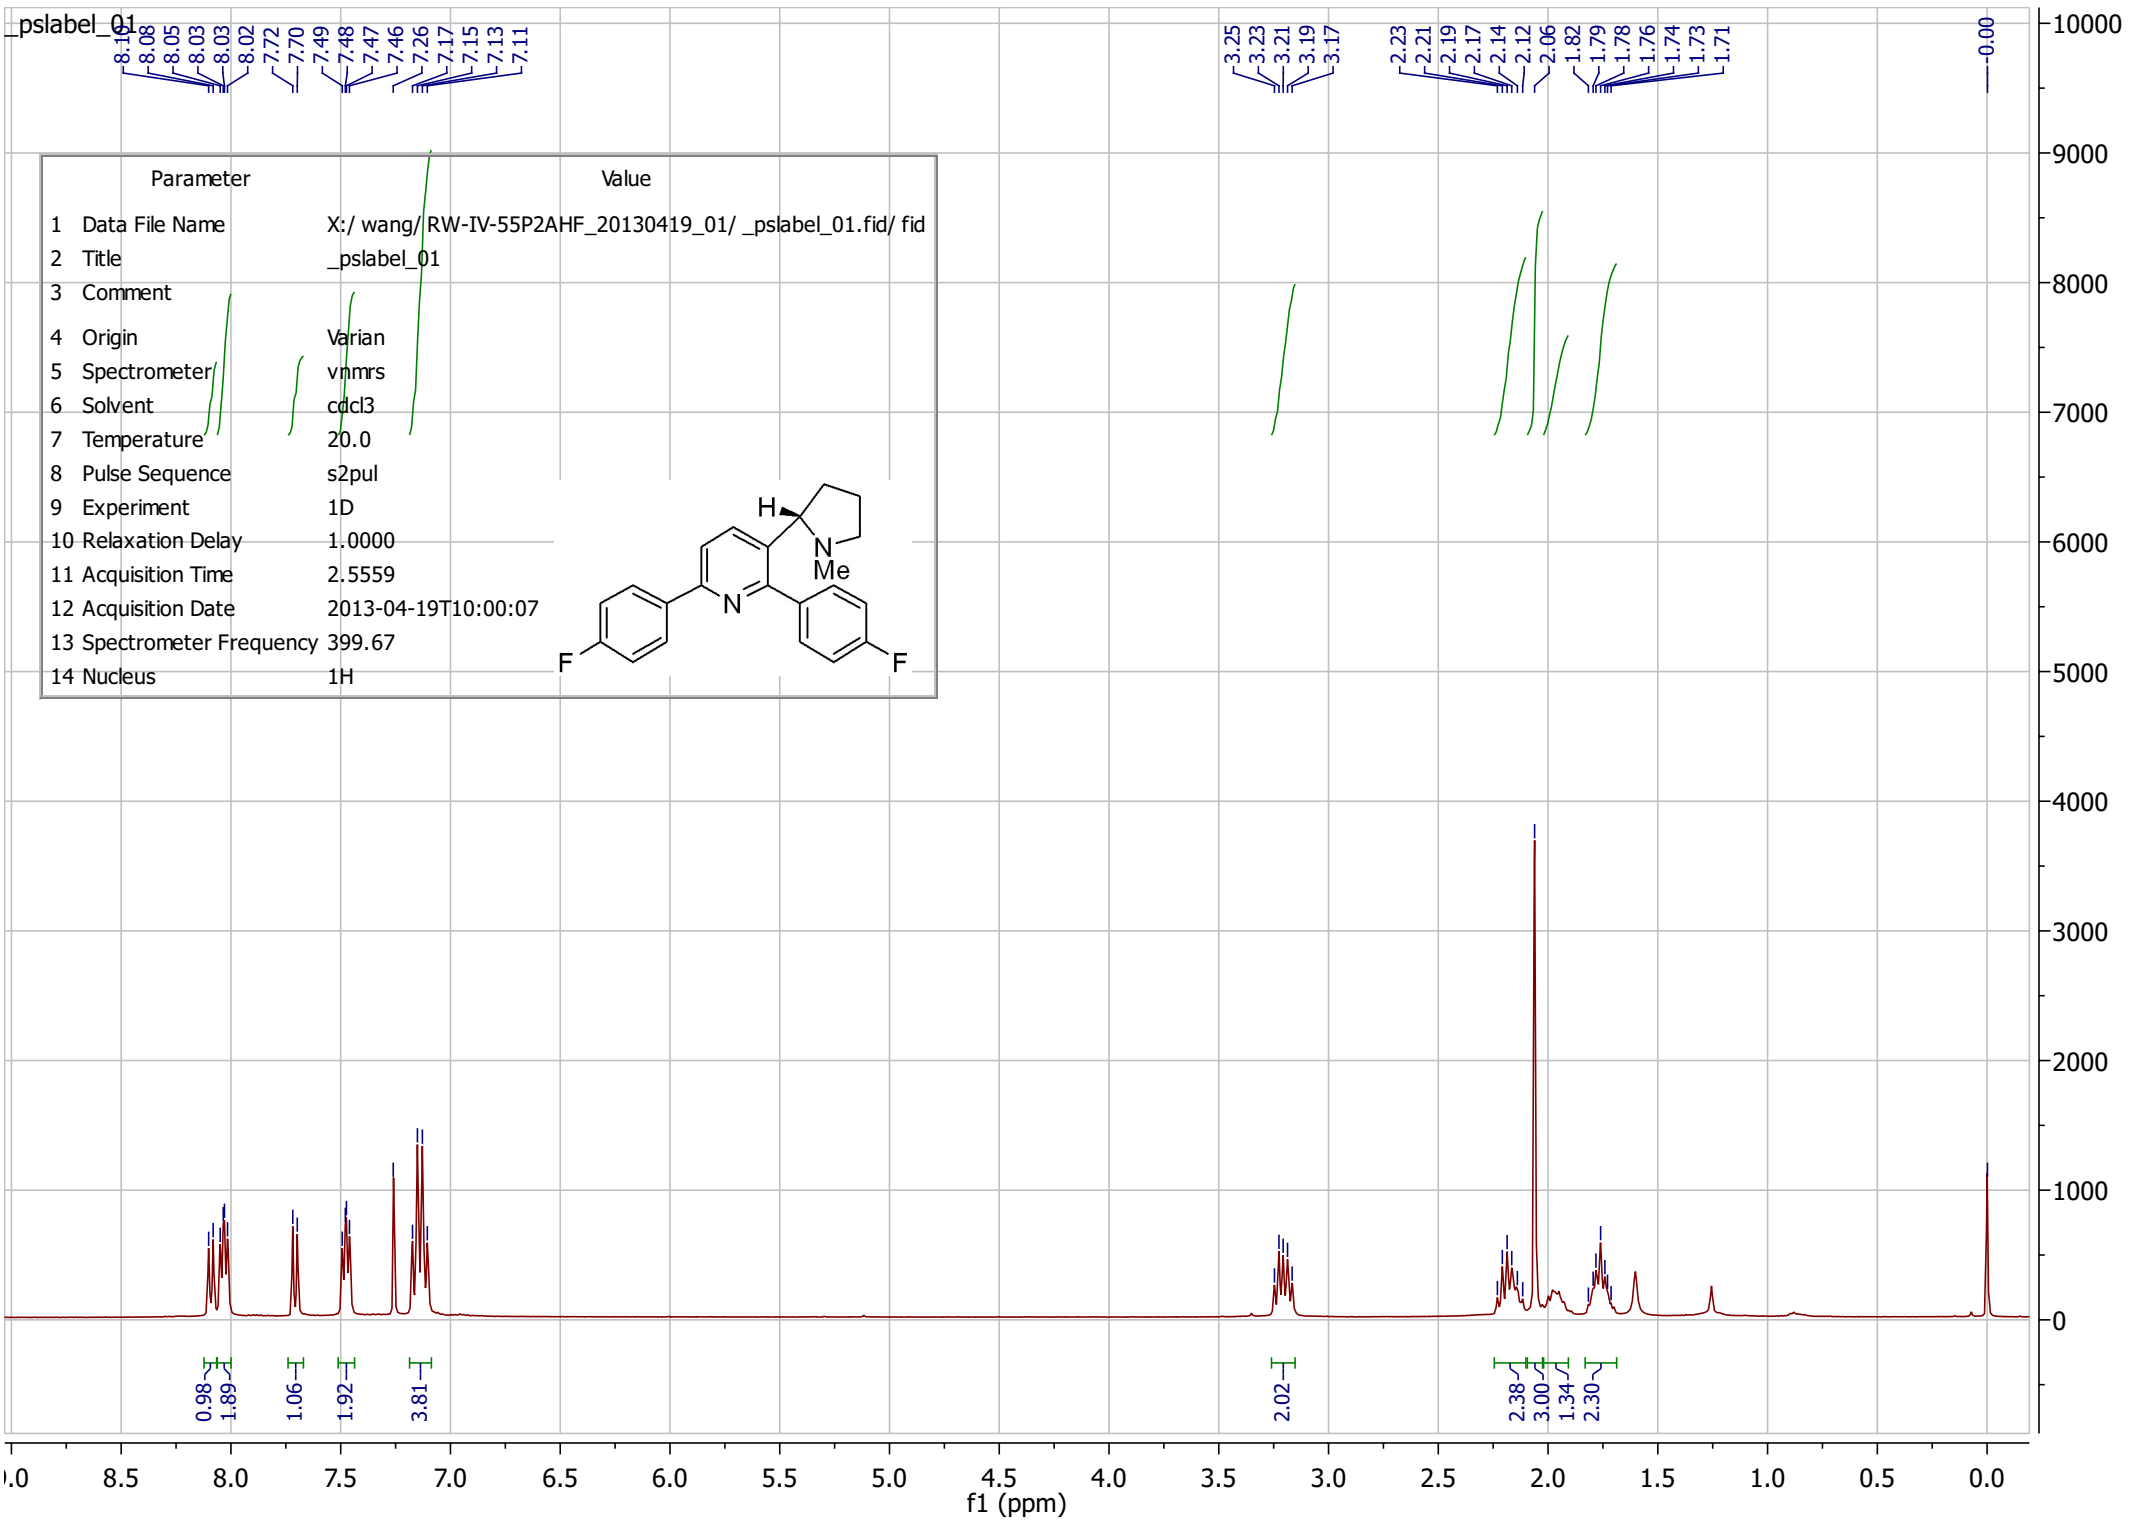

pslabel\_01  
 8.11  
 8.08  
 8.05  
 8.03  
 8.03  
 8.02  
 7.72  
 7.70  
 7.49  
 7.48  
 7.47  
 7.46  
 7.26  
 7.17  
 7.15  
 7.13  
 7.11

3.25  
 3.23  
 3.21  
 3.19  
 3.17  
 2.23  
 2.21  
 2.19  
 2.17  
 2.14  
 2.12  
 2.06  
 1.82  
 1.79  
 1.78  
 1.76  
 1.74  
 1.73  
 1.71

-0.00

| Parameter                 | Value                                                   |
|---------------------------|---------------------------------------------------------|
| 1 Data File Name          | X:/ wang/RW-IV-55P2AHF_20130419_01/_pslabel_01.fid/ fid |
| 2 Title                   | _pslabel_01                                             |
| 3 Comment                 |                                                         |
| 4 Origin                  | Varian                                                  |
| 5 Spectrometer            | vnmrs                                                   |
| 6 Solvent                 | cdcl3                                                   |
| 7 Temperature             | 20.0                                                    |
| 8 Pulse Sequence          | s2pul                                                   |
| 9 Experiment              | 1D                                                      |
| 10 Relaxation Delay       | 1.0000                                                  |
| 11 Acquisition Time       | 2.5559                                                  |
| 12 Acquisition Date       | 2013-04-19T10:00:07                                     |
| 13 Spectrometer Frequency | 399.67                                                  |
| 14 Nucleus                | 1H                                                      |

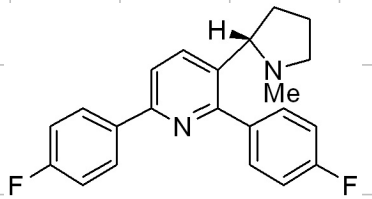

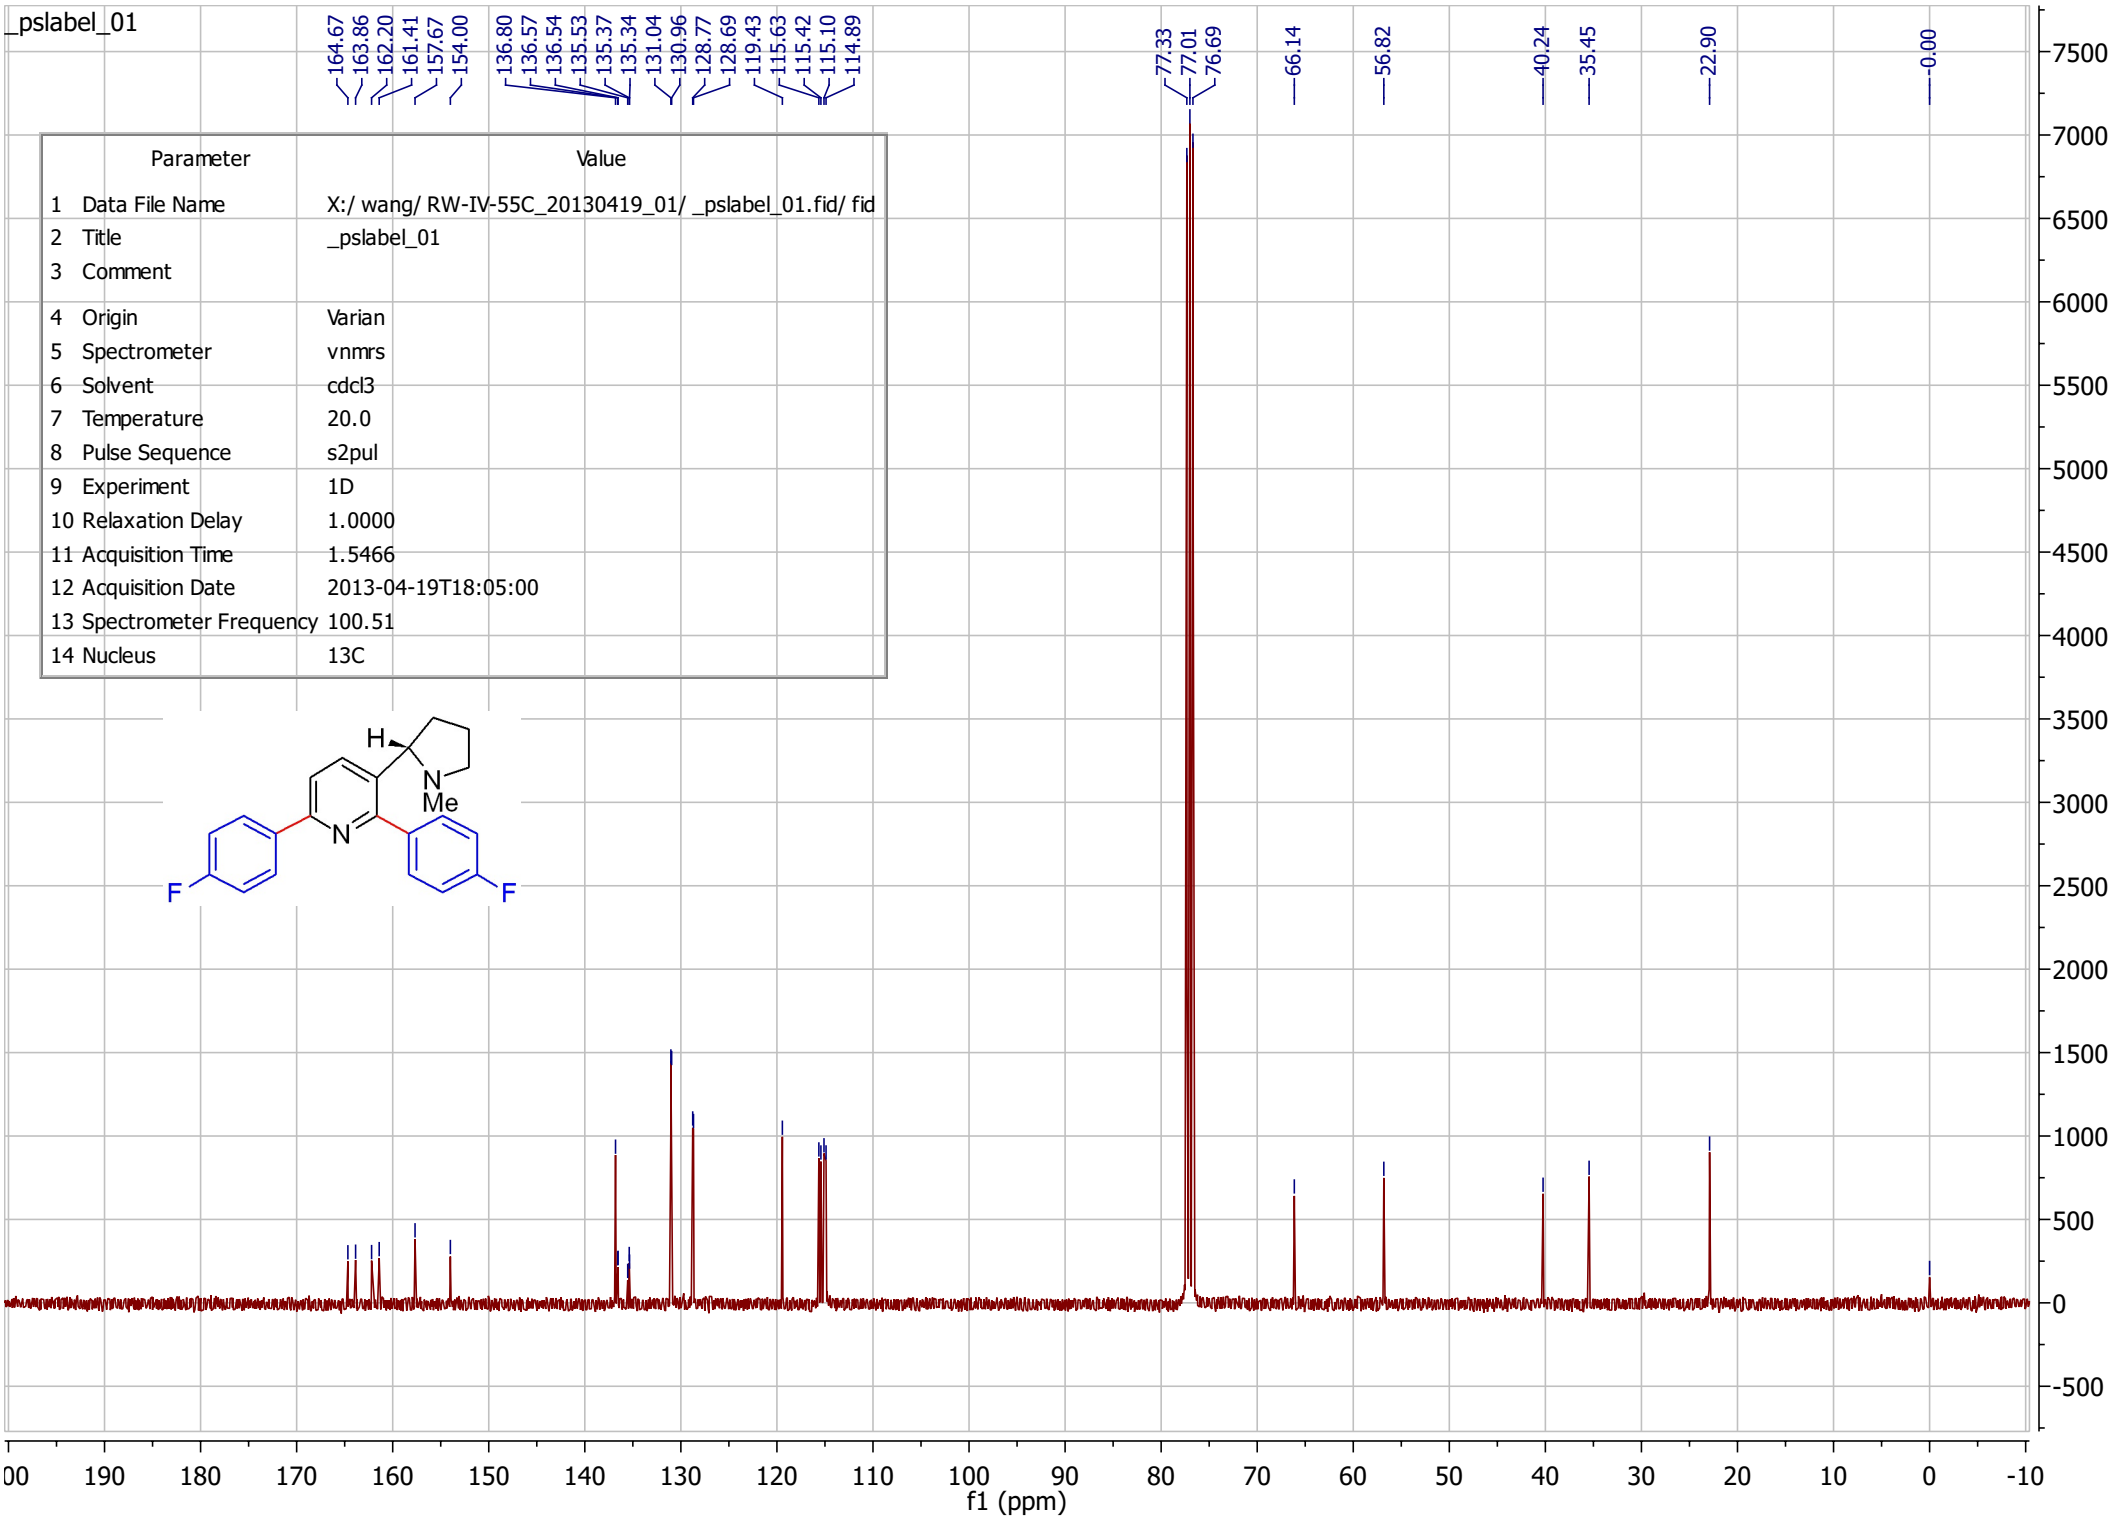

\_pslabel\_02

| Parameter                 | Value                                                     |
|---------------------------|-----------------------------------------------------------|
| 1 Data File Name          | X:/ wang/ RW-IV-55P2AHF_20130419_01/ _pslabel_02.fid/ fid |
| 2 Title                   | _pslabel_02                                               |
| 3 Comment                 |                                                           |
| 4 Origin                  | Varian                                                    |
| 5 Spectrometer            | vnmrs                                                     |
| 6 Solvent                 | cdcl3                                                     |
| 7 Temperature             | 20.0                                                      |
| 8 Pulse Sequence          | s2pul                                                     |
| 9 Experiment              | 1D                                                        |
| 10 Relaxation Delay       | 1.0000                                                    |
| 11 Acquisition Time       | 0.7340                                                    |
| 12 Acquisition Date       | 2013-04-19T10:05:44                                       |
| 13 Spectrometer Frequency | 376.03                                                    |
| 14 Nucleus                | 19F                                                       |

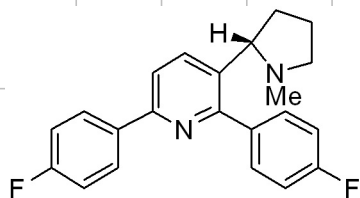

113.41  
113.43  
113.44  
113.46  
113.48  
114.32  
114.34  
114.35  
114.37  
114.39

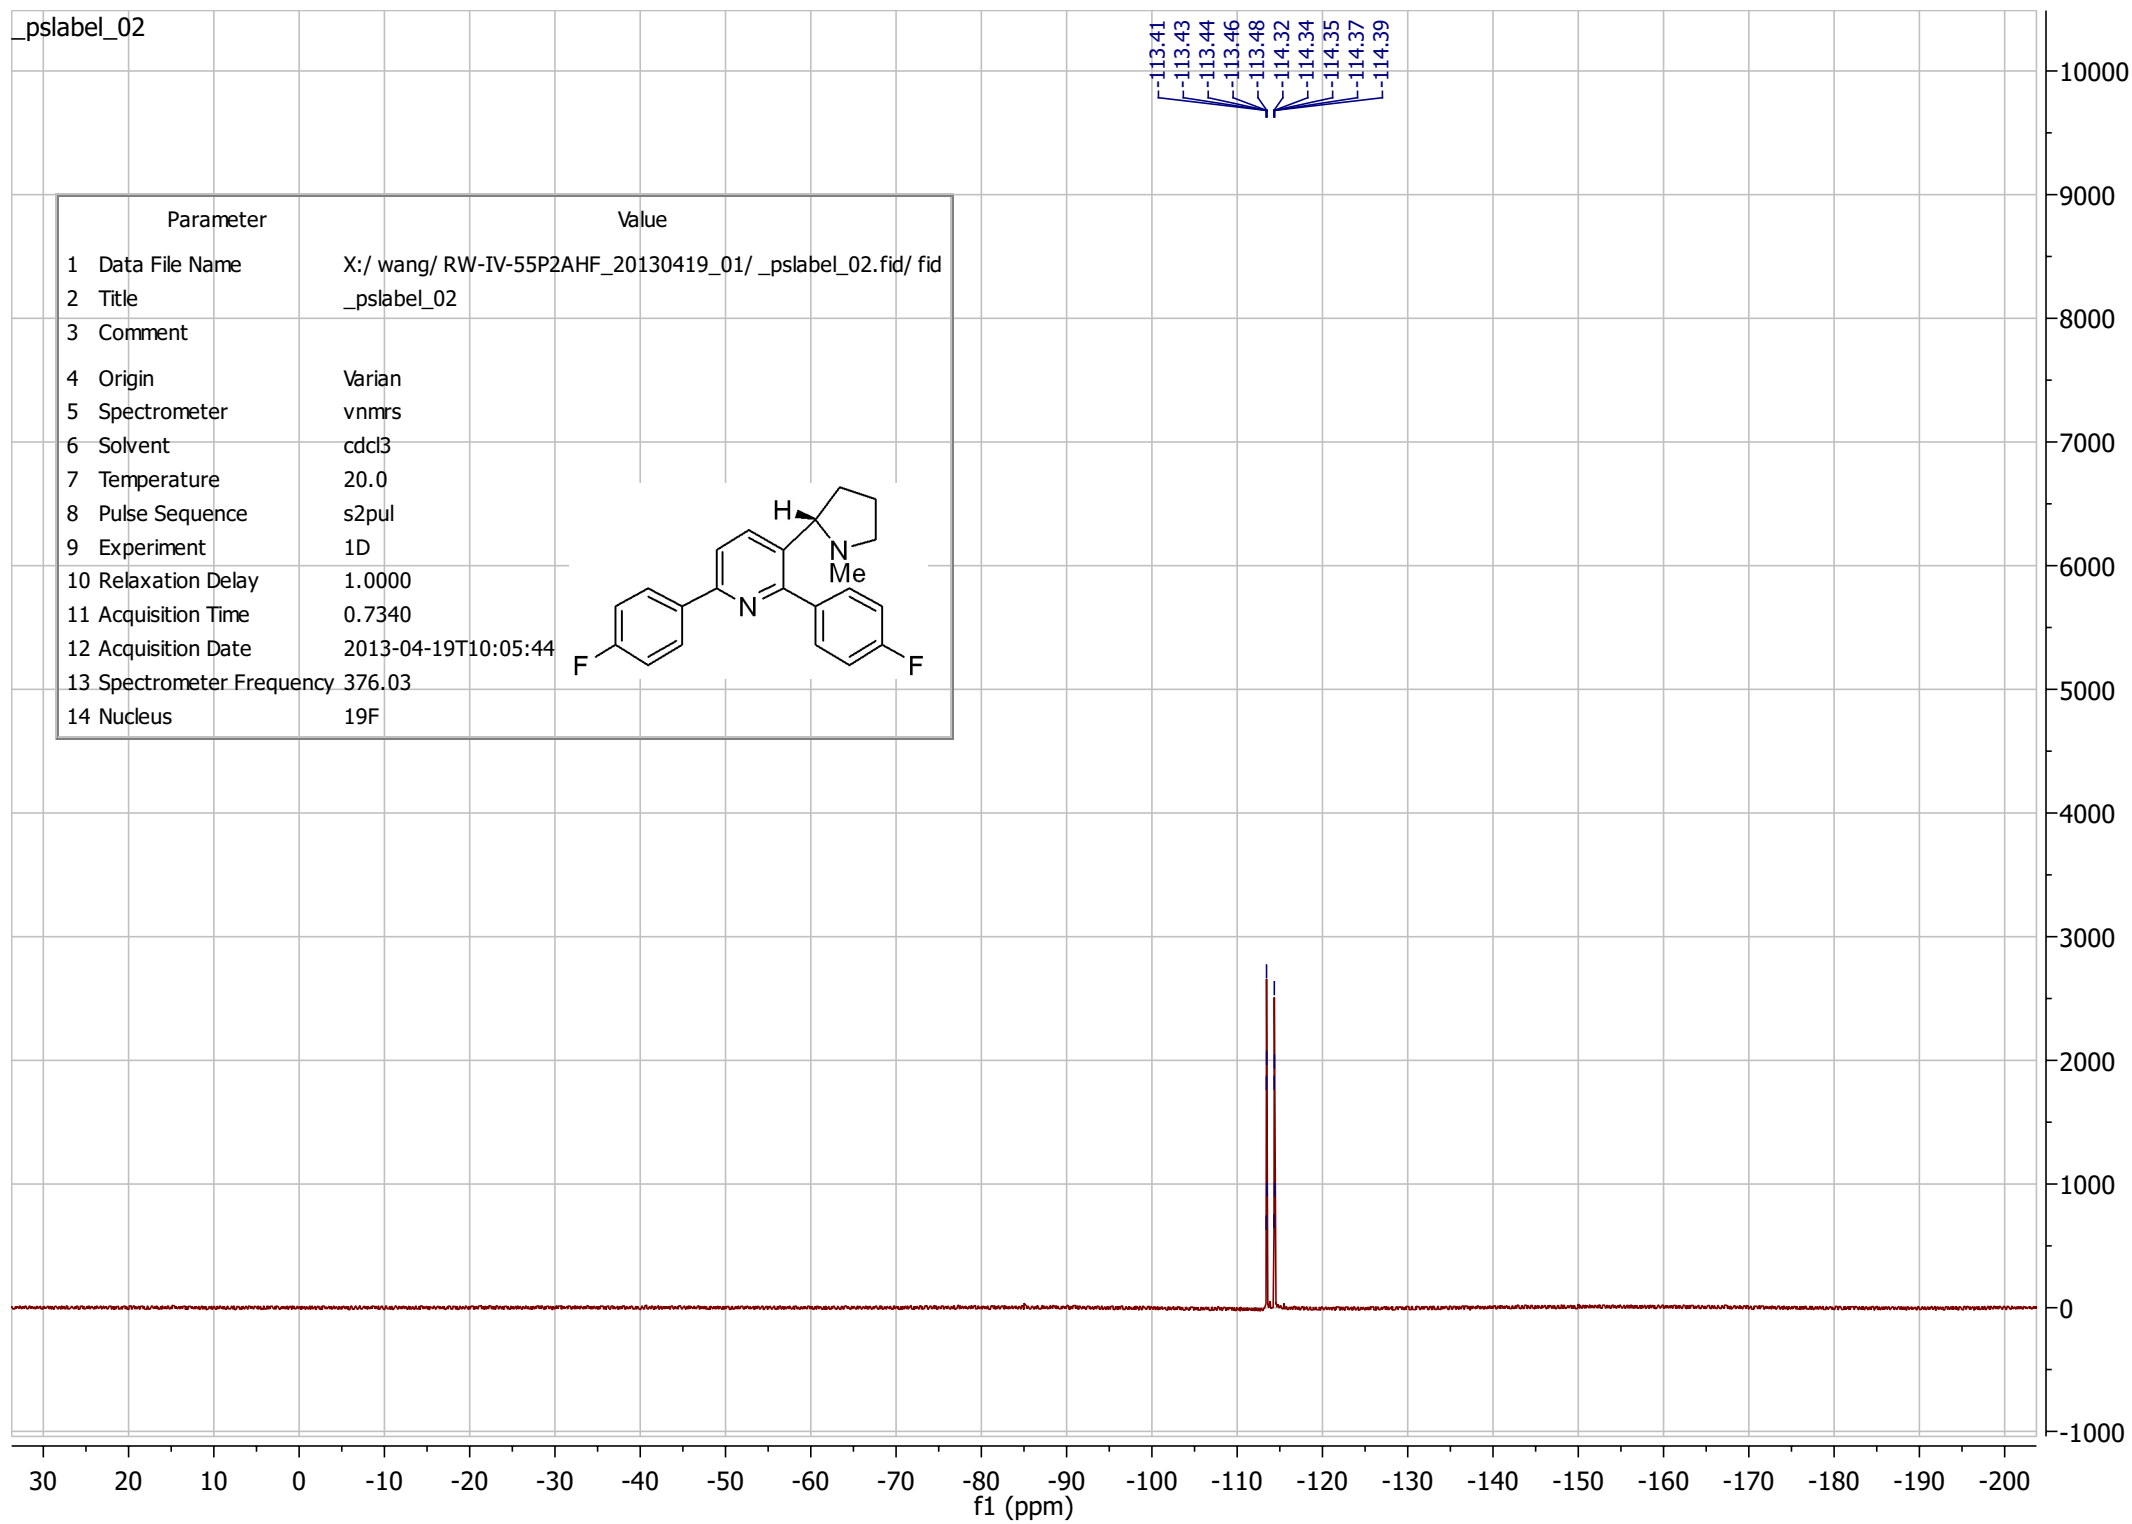

Supplement: c4qo00213j2.pdf [file c4qo00213j2.pdf]
